# Supplementary material
Source: Research Square preprint supplement (doi:10.21203/rs.3.rs-9585445/v1)
Supplement: Supplementary file 1 [file 49b617e187fc5360f341a594.docx]

**Supplementary Information**

Additional file 1:

Figure S1. Length distribution of Unigene.

Figure S2. The numbers of unigenes annotated in four database (KOG, SwissProt, KEGG, Nr) at an E-value < 10−5.

Figure S3. Number of homologous sequences from various species matched to Unigene sequences in the Nr database.

Figure S4. KOG classification statistics.

Figure S5. GO secondary classification statistics.

Figure S6. Gene expression abundance distribution plot and sample expression violin plot.

Figure S7. Sample principal component analysis.

Additional file 2:

Table S1 Correspondence between original sample IDs in the Genome Sequence Archive (GSA) and renamed samples used in this study.

Table S2 The primers used for qRT-PCR analysis.

Table S3 Transcriptome assembly results.

Table S4 Annotated unigenes in four database (KOG, SwissProt, KEGG, Nr) at an E-value < 10−5.

Table S5 SwissProt annotation results.

Table S6 KEGG annotation to pathway results statistics.

Table S7 COG/KOG classification statistics.

Table S8 GO secondary classification statistics.

Table S9 Differentially expressed genes (DEGs) related to plant hormone signaling pathways.
