# Supplementary material
Source: Research Square preprint supplement (doi:10.21203/rs.3.rs-9585445/v1)
Supplement: Supplementary file 2 [file 517e6d59b89da195a5b28f12.xlsx]

## Sheet: Table S1
Table S1 Correspondence between original sample IDs in the Genome Sequence Archive (GSA) and renamed samples used in this study
Original sample ID (in GSA)	Renamed sample ID (in this study)	Description
danhl	Bud_S	single-flower buds
dshl	Bud_SD	semi-double flower buds
yyhl	Bud_D	double-flower buds
dan	Tepal_S	single-flower tepals
ds	Tepal_SD	semi-double flower tepals
yy	Tepal_D	double-flower tepals

## Sheet: Table S2
Table S2 The primers used for qRT-PCR analysis
Description	Genes	Sequences（5' - 3'）	Amplicons（bp）
Forward	CmPI_1	GGAGAAGTACCAGCAGCACT	151
Reverse	CmPI_1	TGGATTCAGCGGGTTCAGAT
Forward	CmJAR1L	CCAACCCATCACTTCGCAAA	233
Reverse	CmJAR1L	AGCCCCGTAATATGCACTCA
Forward	CmWRKY53	CTTTCCACCCACACCAATCG	103
Reverse	CmWRKY53	ACATGGGGATGCCGAGAAAT
Forward	CmZFP1	GGAGGATTCACAAGTGCTCG	126
Reverse	CmZFP1	TTCCAGTTCCAGCTCCACTT
Forward	CmZAT10	CATGACCAAACATCTCCGCC	233
Reverse	CmZAT10	CACCTGTGAATCCTCCCAGT
Forward	CmWRKY40	TCATTTGCTCCAGTTTGCCC	219
Reverse	CmWRKY40	TCTCTCCACAATCTGCCTCG
Forward	CmNAC1	TGCCATGTCAAAACCCGTAG	292
Reverse	CmNAC1	GCAGCACAGAGAACAATCCT
Forward	CmWRKY24	CTTACCCGAATTGTCCGACA	181
Reverse	CmWRKY24	GCACCCAACGAATTATCCGA
Forward	CmMYB86L	TGGGATTGGGCTATCGACAA	276
Reverse	CmMYB86L	ACGTCCTCATGTTCACCTTG
Forward	CmMYB77	CGATGTTGGCCCACTTGTTG	239
Reverse	CmMYB77	AGGATCAAAGGCTCGTGGAC
Forward	CmMyb4L	AGCATTTTCAATCCCATCCGA	273
Reverse	CmMyb4L	GTCCACCTGAGCCTACAACT
Forward	CmbZIP53L	AACGCCAAGATTGTGATGCA	119
Reverse	CmbZIP53L	TTCAACGACCGAAGCCTTTC
Forward	CmNAC62L	GGTATTTTCTGTCCTTCGGCG	295
Reverse	CmNAC62L	AGGAAGATCAACGGTCGGATTC
Forward	18S	CGCGCTACACTGATGTATTC
Reverse	18S	CTGATGACTCGCGCTTACTA

## Sheet: Table S3
Table S3 Transcriptome assembly results
Genes Num	GC percentage	N50 number	N50 length	Max length	Min length	Average length	Total assembled bases
127524	38.7477	24362	1412	16365	201	961	122676266

## Sheet: Table S4
Table S4 Annotated unigenes in four database (KOG, SwissProt, KEGG, Nr) at an E-value < 10−5
Total Unigenes	Nr	KEGG	KEGG_with_KO	KEGG_with_Pathway	KOG	SwissProt	annotation genes	without annotation gene
127524	47845	46372	21225	11572	26711	30491	48937	78587

## Sheet: Table S5
Table S5 SwissProt annotation results
Query_id	Query_length	Query_start	Query_end	Subject_id	Subject_length	Subject_start	Subject_end	Identity(%)	Align_length	Mismatch	Gap	Score	E_value	Subject_annotation
Unigene0000002	774	318	554	sp|Q00451|PRF1_SOLLC	346	264	343	43.8	80	44	1	70.1	4.2e-11	sp|Q00451|PRF1_SOLLC 36.4 kDa proline-rich protein OS=Solanum lycopersicum OX=4081 GN=TPRP-F1 PE=2 SV=1
Unigene0000002	774	318	557	sp|P14009|14KD_DAUCA	137	57	137	35.8	81	51	1	52.8	7.0e-06	sp|P14009|14KD_DAUCA 14 kDa proline-rich protein DC2.15 OS=Daucus carota OX=4039 PE=2 SV=1
Unigene0000002	774	318	443	sp|Q9SU33|ERLL3_ARATH	177	97	138	50	42	21	0	52.8	7.0e-06	sp|Q9SU33|ERLL3_ARATH pEARLI1-like lipid transfer protein 3 OS=Arabidopsis thaliana OX=3702 GN=At4g12500 PE=2 SV=1
Unigene0000002	774	318	443	sp|Q9SU35|ERLL1_ARATH	161	81	122	52.4	42	20	0	52.4	9.2e-06	sp|Q9SU35|ERLL1_ARATH pEARLI1-like lipid transfer protein 1 OS=Arabidopsis thaliana OX=3702 GN=AZI1 PE=1 SV=1
Unigene0000002	774	318	443	sp|Q9SU34|ERLL2_ARATH	182	102	143	52.4	42	20	0	52.4	9.2e-06	sp|Q9SU34|ERLL2_ARATH pEARLI1-like lipid transfer protein 2 OS=Arabidopsis thaliana OX=3702 GN=At4g12490 PE=2 SV=1
Unigene0000006	2914	2700	913	sp|Q5YDB5|CPL2_ARATH	770	7	746	48.7	749	222	162	625.9	7.6e-178	sp|Q5YDB5|CPL2_ARATH RNA polymerase II C-terminal domain phosphatase-like 2 OS=Arabidopsis thaliana OX=3702 GN=CPL2 PE=1 SV=3
Unigene0000006	2914	2691	592	sp|Q5YDB6|CPL1_ARATH	967	9	928	37.3	932	340	244	539.7	7.1e-152	sp|Q5YDB6|CPL1_ARATH RNA polymerase II C-terminal domain phosphatase-like 1 OS=Arabidopsis thaliana OX=3702 GN=CPL1 PE=1 SV=1
Unigene0000007	722	141	311	sp|Q4HXT6|PMP3_GIBZE	57	1	57	93	57	4	0	108.2	1.3e-22	sp|Q4HXT6|PMP3_GIBZE Plasma membrane proteolipid 3 OS=Gibberella zeae (strain ATCC MYA-4620 / CBS 123657 / FGSC 9075 / NRRL 31084 / PH-1) OX=229533 GN=PMP3 PE=3 SV=2
Unigene0000007	722	141	311	sp|Q871V2|PMP3_NEUCR	57	1	57	89.5	57	6	0	104.4	1.9e-21	sp|Q871V2|PMP3_NEUCR Plasma membrane proteolipid 3 OS=Neurospora crassa (strain ATCC 24698 / 74-OR23-1A / CBS 708.71 / DSM 1257 / FGSC 987) OX=367110 GN=pmp-1 PE=3 SV=1
Unigene0000007	722	141	311	sp|P0CS19|PMP3_CRYNB	57	1	57	93	57	4	0	103.6	3.2e-21	sp|P0CS19|PMP3_CRYNB Plasma membrane proteolipid 3 OS=Cryptococcus neoformans var. neoformans serotype D (strain B-3501A) OX=283643 GN=PMP3 PE=3 SV=1
Unigene0000007	722	141	311	sp|P0CS18|PMP3_CRYNJ	57	1	57	93	57	4	0	103.6	3.2e-21	sp|P0CS18|PMP3_CRYNJ Plasma membrane proteolipid 3 OS=Cryptococcus neoformans var. neoformans serotype D (strain JEC21 / ATCC MYA-565) OX=214684 GN=PMP3 PE=3 SV=1
Unigene0000007	722	141	311	sp|Q4WYA5|PMP3_ASPFU	57	1	57	87.7	57	7	0	103.2	4.2e-21	sp|Q4WYA5|PMP3_ASPFU Plasma membrane proteolipid 3 OS=Aspergillus fumigatus (strain ATCC MYA-4609 / CBS 101355 / FGSC A1100 / Af293) OX=330879 GN=pmp3 PE=3 SV=1
Unigene0000007	722	141	311	sp|Q9C1W4|PMP3_SCHPO	57	1	57	78.9	57	12	0	92.8	5.7e-18	sp|Q9C1W4|PMP3_SCHPO Plasma membrane proteolipid 3 OS=Schizosaccharomyces pombe (strain 972 / ATCC 24843) OX=284812 GN=pmp3 PE=3 SV=2
Unigene0000007	722	141	311	sp|Q6BVN0|PMP3_DEBHA	57	1	57	78.9	57	12	0	91.7	1.3e-17	sp|Q6BVN0|PMP3_DEBHA Plasma membrane proteolipid 3 OS=Debaryomyces hansenii (strain ATCC 36239 / CBS 767 / BCRC 21394 / JCM 1990 / NBRC 0083 / IGC 2968) OX=284592 GN=PMP3 PE=3 SV=1
Unigene0000007	722	141	266	sp|Q2HAR0|PMP3_CHAGB	53	1	42	92.9	42	3	0	78.2	1.4e-13	sp|Q2HAR0|PMP3_CHAGB Plasma membrane proteolipid 3 OS=Chaetomium globosum (strain ATCC 6205 / CBS 148.51 / DSM 1962 / NBRC 6347 / NRRL 1970) OX=306901 GN=PMP3 PE=3 SV=1
Unigene0000007	722	141	311	sp|Q22702|YCU5_CAEEL	57	1	57	64.9	57	20	0	75.5	9.4e-13	sp|Q22702|YCU5_CAEEL UPF0057 membrane protein T23F2.5 OS=Caenorhabditis elegans OX=6239 GN=T23F2.5 PE=3 SV=1
Unigene0000007	722	141	308	sp|Q9Y068|RIC1_PHYIN	57	1	56	60.7	56	22	0	75.1	1.2e-12	sp|Q9Y068|RIC1_PHYIN Protein Ric1 OS=Phytophthora infestans OX=4787 GN=RIC1 PE=3 SV=1
Unigene0000007	722	141	311	sp|Q22700|YCU3_CAEEL	57	1	57	66.7	57	19	0	73.9	2.7e-12	sp|Q22700|YCU3_CAEEL UPF0057 membrane protein T23F2.3 OS=Caenorhabditis elegans OX=6239 GN=T23F2.3 PE=3 SV=1
Unigene0000007	722	141	311	sp|Q22701|YCU4_CAEEL	57	1	57	64.9	57	20	0	71.2	1.8e-11	sp|Q22701|YCU4_CAEEL UPF0057 membrane protein T23F2.4 OS=Caenorhabditis elegans OX=6239 GN=T23F2.4 PE=3 SV=2
Unigene0000007	722	159	308	sp|Q9I5W9|Y567_PSEAE	52	2	51	62	50	19	0	67.8	2.0e-10	sp|Q9I5W9|Y567_PSEAE UPF0057 membrane protein PA0567 OS=Pseudomonas aeruginosa (strain ATCC 15692 / DSM 22644 / CIP 104116 / JCM 14847 / LMG 12228 / 1C / PRS 101 / PAO1) OX=208964 GN=PA0567 PE=3 SV=1
Unigene0000007	722	171	308	sp|Q9ZNQ7|RCI2A_ARATH	54	9	54	60.9	46	18	0	62.8	6.3e-09	sp|Q9ZNQ7|RCI2A_ARATH Hydrophobic protein RCI2A OS=Arabidopsis thaliana OX=3702 GN=RCI2A PE=2 SV=1
Unigene0000007	722	162	305	sp|P34655|YOT0_CAEEL	80	1	51	66.7	51	14	3	62.8	6.3e-09	sp|P34655|YOT0_CAEEL UPF0057 membrane protein ZK632.10 OS=Caenorhabditis elegans OX=6239 GN=ZK632.10 PE=3 SV=2
Unigene0000007	722	171	308	sp|A2Y075|LTI6B_ORYSI	55	10	55	65.2	46	16	0	62	1.1e-08	sp|A2Y075|LTI6B_ORYSI Hydrophobic protein LTI6B OS=Oryza sativa subsp. indica OX=39946 GN=LTI6B PE=3 SV=2
Unigene0000007	722	171	308	sp|Q0DKW8|LTI6B_ORYSJ	55	10	55	65.2	46	16	0	62	1.1e-08	sp|Q0DKW8|LTI6B_ORYSJ Hydrophobic protein LTI6B OS=Oryza sativa subsp. japonica OX=39947 GN=LTI6B PE=2 SV=1
Unigene0000007	722	165	305	sp|Q9M095|RC23_ARATH	73	9	56	62.5	48	17	1	61.6	1.4e-08	sp|Q9M095|RC23_ARATH UPF0057 membrane protein At4g30650 OS=Arabidopsis thaliana OX=3702 GN=At4g30650 PE=3 SV=1
Unigene0000007	722	141	305	sp|Q9SUI0|RC24_ARATH	74	1	56	51.8	56	26	1	61.6	1.4e-08	sp|Q9SUI0|RC24_ARATH UPF0057 membrane protein At4g30660 OS=Arabidopsis thaliana OX=3702 GN=At4g30660 PE=3 SV=1
Unigene0000007	722	168	308	sp|Q9ZNS6|RCI2B_ARATH	54	8	54	61.7	47	18	0	61.6	1.4e-08	sp|Q9ZNS6|RCI2B_ARATH Hydrophobic protein RCI2B OS=Arabidopsis thaliana OX=3702 GN=RCI2B PE=2 SV=1
Unigene0000009	1952	421	1737	sp|Q5W736|CIPKI_ORYSJ	457	3	447	74.2	445	109	6	668.3	8.9e-191	sp|Q5W736|CIPKI_ORYSJ CBL-interacting protein kinase 18 OS=Oryza sativa subsp. japonica OX=39947 GN=CIPK18 PE=2 SV=1
Unigene0000009	1952	427	1752	sp|Q7X996|CIPK2_ORYSJ	443	3	440	73.8	442	112	4	666	4.4e-190	sp|Q7X996|CIPK2_ORYSJ CBL-interacting protein kinase 2 OS=Oryza sativa subsp. japonica OX=39947 GN=CIPK2 PE=2 SV=1
Unigene0000009	1952	424	1752	sp|Q9C562|CIPKA_ARATH	479	1	457	66.5	457	139	14	636	4.9e-181	sp|Q9C562|CIPKA_ARATH CBL-interacting serine/threonine-protein kinase 10 OS=Arabidopsis thaliana OX=3702 GN=CIPK10 PE=1 SV=1
Unigene0000009	1952	424	1752	sp|Q10LQ2|CIPKA_ORYSJ	451	2	450	69	455	123	18	620.9	1.6e-176	sp|Q10LQ2|CIPKA_ORYSJ CBL-interacting protein kinase 10 OS=Oryza sativa subsp. japonica OX=39947 GN=CIPK10 PE=2 SV=1
Unigene0000009	1952	424	1776	sp|Q9LYQ8|CIPK2_ARATH	456	1	451	67.3	456	139	10	612.5	5.8e-174	sp|Q9LYQ8|CIPK2_ARATH CBL-interacting serine/threonine-protein kinase 2 OS=Arabidopsis thaliana OX=3702 GN=CIPK2 PE=1 SV=1
Unigene0000009	1952	424	1749	sp|Q9LWM4|CIPK5_ORYSJ	461	1	445	66.2	455	131	23	604	2.1e-171	sp|Q9LWM4|CIPK5_ORYSJ CBL-interacting protein kinase 5 OS=Oryza sativa subsp. japonica OX=39947 GN=CIPK5 PE=2 SV=1
Unigene0000009	1952	424	1728	sp|Q9FJ54|CIPKK_ARATH	439	1	425	68.9	437	122	14	598.6	8.6e-170	sp|Q9FJ54|CIPKK_ARATH CBL-interacting serine/threonine-protein kinase 20 OS=Arabidopsis thaliana OX=3702 GN=CIPK20 PE=1 SV=1
Unigene0000009	1952	424	1734	sp|Q0JI49|CIPKB_ORYSJ	502	2	439	66.1	439	146	3	594.3	1.6e-168	sp|Q0JI49|CIPKB_ORYSJ CBL-interacting protein kinase 11 OS=Oryza sativa subsp. japonica OX=39947 GN=CIPK11 PE=2 SV=1
Unigene0000009	1952	424	1758	sp|Q6H7U5|CIPKQ_ORYSJ	493	1	474	64.2	475	139	31	594	2.1e-168	sp|Q6H7U5|CIPKQ_ORYSJ CBL-interacting protein kinase 26 OS=Oryza sativa subsp. japonica OX=39947 GN=CIPK26 PE=2 SV=1
Unigene0000009	1952	424	1734	sp|Q2QYM3|CIPKE_ORYSJ	439	1	439	64.5	439	154	2	571.2	1.5e-161	sp|Q2QYM3|CIPKE_ORYSJ CBL-interacting protein kinase 14 OS=Oryza sativa subsp. japonica OX=39947 GN=CIPK14 PE=2 SV=1
Unigene0000009	1952	439	1737	sp|A3B529|CIPKS_ORYSJ	435	5	435	65	437	143	10	569.3	5.6e-161	sp|A3B529|CIPKS_ORYSJ CBL-interacting protein kinase 28 OS=Oryza sativa subsp. japonica OX=39947 GN=CIPK28 PE=2 SV=2
Unigene0000009	1952	424	1719	sp|Q2RBF0|CIPKF_ORYSJ	434	1	434	64.5	434	152	2	563.5	3.1e-159	sp|Q2RBF0|CIPKF_ORYSJ CBL-interacting protein kinase 15 OS=Oryza sativa subsp. japonica OX=39947 GN=CIPK15 PE=2 SV=1
Unigene0000009	1952	424	1722	sp|P92937|CIPKF_ARATH	421	1	420	64.1	434	141	15	555.4	8.4e-157	sp|P92937|CIPKF_ARATH CBL-interacting serine/threonine-protein kinase 15 OS=Arabidopsis thaliana OX=3702 GN=CIPK15 PE=1 SV=2
Unigene0000009	1952	430	1716	sp|O65554|CIPK6_ARATH	441	15	436	61.9	433	150	15	527.3	2.4e-148	sp|O65554|CIPK6_ARATH CBL-interacting serine/threonine-protein kinase 6 OS=Arabidopsis thaliana OX=3702 GN=CIPK6 PE=1 SV=1
Unigene0000009	1952	421	1710	sp|Q9SN43|CIPKC_ARATH	489	14	455	61	444	157	16	519.2	6.7e-146	sp|Q9SN43|CIPKC_ARATH CBL-interacting serine/threonine-protein kinase 12 OS=Arabidopsis thaliana OX=3702 GN=CIPK12 PE=1 SV=1
Unigene0000009	1952	415	1710	sp|Q9FJ55|CIPKJ_ARATH	483	14	460	58.3	451	165	23	511.5	1.4e-143	sp|Q9FJ55|CIPKJ_ARATH CBL-interacting serine/threonine-protein kinase 19 OS=Arabidopsis thaliana OX=3702 GN=CIPK19 PE=1 SV=1
Unigene0000009	1952	439	1713	sp|Q9LP51|CIPKI_ARATH	520	68	503	59.5	437	164	13	508.4	1.2e-142	sp|Q9LP51|CIPKI_ARATH CBL-interacting serine/threonine-protein kinase 18 OS=Arabidopsis thaliana OX=3702 GN=CIPK18 PE=1 SV=1
Unigene0000009	1952	442	1731	sp|Q8W1D5|CIPKP_ARATH	488	38	465	58.5	431	175	4	507.7	2.0e-142	sp|Q8W1D5|CIPKP_ARATH CBL-interacting serine/threonine-protein kinase 25 OS=Arabidopsis thaliana OX=3702 GN=CIPK25 PE=2 SV=1
Unigene0000009	1952	424	1716	sp|Q60EY8|CIPKK_ORYSJ	466	1	439	56.9	452	161	34	501.9	1.1e-140	sp|Q60EY8|CIPKK_ORYSJ CBL-interacting protein kinase 20 OS=Oryza sativa subsp. japonica OX=39947 GN=CIPK20 PE=2 SV=1
Unigene0000009	1952	436	1713	sp|Q68Y49|CIPKJ_ORYSJ	508	30	494	55.6	468	163	45	495.7	7.9e-139	sp|Q68Y49|CIPKJ_ORYSJ CBL-interacting protein kinase 19 OS=Oryza sativa subsp. japonica OX=39947 GN=CIPK19 PE=1 SV=1
Unigene0000010	950	99	947	sp|Q9US27|LOA1_SCHPO	300	1	287	27.2	294	196	18	82	1.3e-14	sp|Q9US27|LOA1_SCHPO Putative lysophosphatidic acid:oleoyl-CoA acyltransferase OS=Schizosaccharomyces pombe (strain 972 / ATCC 24843) OX=284812 GN=vps66 PE=3 SV=2
Unigene0000010	950	99	878	sp|Q06508|LOA1_YEAST	300	1	262	24.6	276	178	30	57	4.6e-07	sp|Q06508|LOA1_YEAST Lysophosphatidic acid:oleoyl-CoA acyltransferase 1 OS=Saccharomyces cerevisiae (strain ATCC 204508 / S288c) OX=559292 GN=LOA1 PE=1 SV=1
Unigene0000012	800	744	91	sp|Q9FNH6|NHL3_ARATH	231	4	230	44.4	234	107	23	163.3	3.8e-39	sp|Q9FNH6|NHL3_ARATH NDR1/HIN1-like protein 3 OS=Arabidopsis thaliana OX=3702 GN=NHL3 PE=1 SV=1
Unigene0000012	800	744	91	sp|Q9SJ52|NHL10_ARATH	227	7	226	41.4	227	117	16	154.1	2.3e-36	sp|Q9SJ52|NHL10_ARATH NDR1/HIN1-like protein 10 OS=Arabidopsis thaliana OX=3702 GN=NHL10 PE=2 SV=1
Unigene0000012	800	756	88	sp|Q9SRN1|NHL2_ARATH	240	4	239	38.9	239	127	19	134	2.5e-30	sp|Q9SRN1|NHL2_ARATH NDR1/HIN1-like protein 2 OS=Arabidopsis thaliana OX=3702 GN=NHL2 PE=2 SV=1
Unigene0000013	1267	1154	162	sp|Q9FFC6|GDL78_ARATH	362	30	362	65.5	333	113	2	446.4	3.6e-124	sp|Q9FFC6|GDL78_ARATH GDSL esterase/lipase At5g22810 OS=Arabidopsis thaliana OX=3702 GN=At5g22810 PE=3 SV=3
Unigene0000013	1267	1214	162	sp|Q9LZC5|GDL73_ARATH	354	3	354	62.1	354	129	5	441.8	8.8e-123	sp|Q9LZC5|GDL73_ARATH GDSL esterase/lipase At5g03820 OS=Arabidopsis thaliana OX=3702 GN=At5g03820 PE=3 SV=1
Unigene0000013	1267	1211	162	sp|Q9FFN0|GDL72_ARATH	353	3	353	62.6	353	127	5	438.7	7.4e-122	sp|Q9FFN0|GDL72_ARATH GDSL esterase/lipase At5g03810 OS=Arabidopsis thaliana OX=3702 GN=At5g03810 PE=3 SV=1
Unigene0000013	1267	1184	162	sp|Q0WPI9|GDL59_ARATH	351	11	351	59.8	343	134	4	420.2	2.7e-116	sp|Q0WPI9|GDL59_ARATH GDSL esterase/lipase At3g53100 OS=Arabidopsis thaliana OX=3702 GN=At3g53100 PE=2 SV=1
Unigene0000013	1267	1199	165	sp|Q9LU14|APG2_ARATH	353	9	352	60.5	347	132	5	419.5	4.7e-116	sp|Q9LU14|APG2_ARATH GDSL esterase/lipase APG OS=Arabidopsis thaliana OX=3702 GN=APG PE=2 SV=1
Unigene0000013	1267	1196	186	sp|Q9SJB4|GDL34_ARATH	350	10	342	43.7	339	183	8	284.3	2.3e-75	sp|Q9SJB4|GDL34_ARATH GDSL esterase/lipase At2g04570 OS=Arabidopsis thaliana OX=3702 GN=At2g04570 PE=2 SV=1
Unigene0000013	1267	1139	186	sp|Q9FHW9|GDL90_ARATH	369	48	361	42.3	319	178	6	271.2	2.1e-71	sp|Q9FHW9|GDL90_ARATH GDSL esterase/lipase At5g42170 OS=Arabidopsis thaliana OX=3702 GN=At5g42170/At5g42160 PE=3 SV=2
Unigene0000013	1267	1139	195	sp|Q67ZI9|GDL48_ARATH	350	26	339	40.5	316	185	3	255	1.5e-66	sp|Q67ZI9|GDL48_ARATH GDSL esterase/lipase At2g42990 OS=Arabidopsis thaliana OX=3702 GN=At2g42990 PE=2 SV=1
Unigene0000013	1267	1223	186	sp|Q8VY93|GDL66_ARATH	351	2	343	39.5	347	204	6	254.6	2.0e-66	sp|Q8VY93|GDL66_ARATH GDSL esterase/lipase At4g26790 OS=Arabidopsis thaliana OX=3702 GN=At4g26790 PE=2 SV=1
Unigene0000013	1267	1139	213	sp|Q9FJ40|GDL86_ARATH	375	45	356	42.2	315	173	9	252.7	7.6e-66	sp|Q9FJ40|GDL86_ARATH GDSL esterase/lipase At5g45960 OS=Arabidopsis thaliana OX=3702 GN=At5g45960 PE=2 SV=1
Unigene0000013	1267	1139	180	sp|Q9LH73|GDL52_ARATH	351	30	344	39.9	321	186	7	251.9	1.3e-65	sp|Q9LH73|GDL52_ARATH GDSL esterase/lipase At3g14820 OS=Arabidopsis thaliana OX=3702 GN=At3g14820 PE=3 SV=2
Unigene0000013	1267	1142	186	sp|Q94CH6|EXL3_ARATH	364	40	356	40	320	188	4	251.1	2.2e-65	sp|Q94CH6|EXL3_ARATH GDSL esterase/lipase EXL3 OS=Arabidopsis thaliana OX=3702 GN=EXL3 PE=2 SV=1
Unigene0000013	1267	1136	198	sp|P0DKJ6|GDL4_ARATH	402	77	388	40.4	314	184	3	243.8	3.5e-63	sp|P0DKJ6|GDL4_ARATH GDSL esterase/lipase At1g20120 OS=Arabidopsis thaliana OX=3702 GN=At1g20120 PE=2 SV=1
Unigene0000013	1267	1148	189	sp|Q9C648|GDL23_ARATH	360	30	350	40.1	324	187	7	241.9	1.3e-62	sp|Q9C648|GDL23_ARATH GDSL esterase/lipase At1g58430 OS=Arabidopsis thaliana OX=3702 GN=At1g58430 PE=2 SV=1
Unigene0000013	1267	1217	180	sp|Q9SJA9|GDL39_ARATH	363	3	352	38.8	353	206	10	239.2	8.6e-62	sp|Q9SJA9|GDL39_ARATH GDSL esterase/lipase At2g24560 OS=Arabidopsis thaliana OX=3702 GN=At2g24560 PE=2 SV=2
Unigene0000013	1267	1145	180	sp|Q9FMK6|GDL89_ARATH	338	24	332	41.5	323	174	15	238.8	1.1e-61	sp|Q9FMK6|GDL89_ARATH GDSL esterase/lipase At5g63170 OS=Arabidopsis thaliana OX=3702 GN=At5g63170 PE=3 SV=1
Unigene0000013	1267	1136	198	sp|Q94CH7|EXL2_ARATH	379	46	371	38.4	328	185	17	236.9	4.3e-61	sp|Q94CH7|EXL2_ARATH GDSL esterase/lipase EXL2 OS=Arabidopsis thaliana OX=3702 GN=EXL2 PE=2 SV=1
Unigene0000013	1267	1142	177	sp|Q9SIQ2|GDL44_ARATH	360	32	356	40.5	328	186	9	236.9	4.3e-61	sp|Q9SIQ2|GDL44_ARATH GDSL esterase/lipase At2g31550 OS=Arabidopsis thaliana OX=3702 GN=At2g31550 PE=3 SV=3
Unigene0000013	1267	1142	177	sp|Q9SIQ3|GDL43_ARATH	360	32	356	40.5	328	186	9	236.5	5.6e-61	sp|Q9SIQ3|GDL43_ARATH GDSL esterase/lipase At2g31540 OS=Arabidopsis thaliana OX=3702 GN=At2g31540 PE=2 SV=1
Unigene0000013	1267	1148	180	sp|O22918|GDL41_ARATH	358	28	351	39.4	327	191	7	234.6	2.1e-60	sp|O22918|GDL41_ARATH GDSL esterase/lipase At2g30220 OS=Arabidopsis thaliana OX=3702 GN=At2g30220 PE=3 SV=1
Unigene0000022	694	19	624	sp|O43105|RS7_NEUCR	202	2	202	80.7	202	38	1	310.5	1.7e-83	sp|O43105|RS7_NEUCR Small ribosomal subunit protein eS7 OS=Neurospora crassa (strain ATCC 24698 / 74-OR23-1A / CBS 708.71 / DSM 1257 / FGSC 987) OX=367110 GN=crp-15 PE=1 SV=2
Unigene0000022	694	22	603	sp|Q10101|RS7_SCHPO	195	1	188	60.3	194	71	6	222.2	6.0e-57	sp|Q10101|RS7_SCHPO Small ribosomal subunit protein eS7 OS=Schizosaccharomyces pombe (strain 972 / ATCC 24843) OX=284812 GN=rps7 PE=1 SV=2
Unigene0000022	694	55	606	sp|P02362|RS7_XENLA	194	11	191	60.3	184	70	3	214.5	1.2e-54	sp|P02362|RS7_XENLA Small ribosomal subunit protein eS7 OS=Xenopus laevis OX=8355 GN=rps7 PE=1 SV=2
Unigene0000022	694	70	603	sp|P26786|RS7A_YEAST	190	13	186	60.7	178	66	4	214.2	1.6e-54	sp|P26786|RS7A_YEAST Small ribosomal subunit protein eS7A OS=Saccharomyces cerevisiae (strain ATCC 204508 / S288c) OX=559292 GN=RPS7A PE=1 SV=4
Unigene0000022	694	25	606	sp|A6H769|RS7_BOVIN	194	3	191	59.3	194	74	5	213.8	2.1e-54	sp|A6H769|RS7_BOVIN Small ribosomal subunit protein eS7 OS=Bos taurus OX=9913 GN=RPS7 PE=1 SV=1
Unigene0000022	694	25	606	sp|Q5RT64|RS7_FELCA	194	3	191	59.3	194	74	5	213.8	2.1e-54	sp|Q5RT64|RS7_FELCA Small ribosomal subunit protein eS7 OS=Felis catus OX=9685 GN=RPS7 PE=2 SV=1
Unigene0000022	694	25	606	sp|P62081|RS7_HUMAN	194	3	191	59.3	194	74	5	213.8	2.1e-54	sp|P62081|RS7_HUMAN Small ribosomal subunit protein eS7 OS=Homo sapiens OX=9606 GN=RPS7 PE=1 SV=1
Unigene0000022	694	25	606	sp|P62082|RS7_MOUSE	194	3	191	59.3	194	74	5	213.8	2.1e-54	sp|P62082|RS7_MOUSE Small ribosomal subunit protein eS7 OS=Mus musculus OX=10090 GN=Rps7 PE=1 SV=1
Unigene0000022	694	25	606	sp|G1SVB0|RS7_RABIT	194	3	191	59.3	194	74	5	213.8	2.1e-54	sp|G1SVB0|RS7_RABIT Small ribosomal subunit protein eS7 OS=Oryctolagus cuniculus OX=9986 GN=RPS7 PE=1 SV=3
Unigene0000022	694	25	606	sp|P62083|RS7_RAT	194	3	191	59.3	194	74	5	213.8	2.1e-54	sp|P62083|RS7_RAT Small ribosomal subunit protein eS7 OS=Rattus norvegicus OX=10116 GN=Rps7 PE=1 SV=1
Unigene0000022	694	70	606	sp|Q90YR7|RS7_ICTPU	194	16	191	60.9	179	67	3	209.9	3.1e-53	sp|Q90YR7|RS7_ICTPU Small ribosomal subunit protein eS7 OS=Ictalurus punctatus OX=7998 GN=rps7 PE=2 SV=1
Unigene0000022	694	55	606	sp|P50894|RS7_TAKRU	194	11	191	58.2	184	74	3	208.8	6.8e-53	sp|P50894|RS7_TAKRU Small ribosomal subunit protein eS7 OS=Takifugu rubripes OX=31033 GN=rps7 PE=3 SV=1
Unigene0000022	694	67	603	sp|Q5AJ93|RS7A_CANAL	186	9	182	61.5	179	64	5	208	1.2e-52	sp|Q5AJ93|RS7A_CANAL Small ribosomal subunit protein eS7 OS=Candida albicans (strain SC5314 / ATCC MYA-2876) OX=237561 GN=RPS7A PE=1 SV=1
Unigene0000022	694	70	603	sp|P48164|RS7B_YEAST	190	13	186	58.4	178	70	4	207.6	1.5e-52	sp|P48164|RS7B_YEAST Small ribosomal subunit protein eS7B OS=Saccharomyces cerevisiae (strain ATCC 204508 / S288c) OX=559292 GN=RPS7B PE=1 SV=1
Unigene0000022	694	55	606	sp|P62084|RS7_DANRE	194	11	191	58.2	184	74	3	205.7	5.8e-52	sp|P62084|RS7_DANRE Small ribosomal subunit protein eS7 OS=Danio rerio OX=7955 GN=rps7 PE=1 SV=1
Unigene0000022	694	58	606	sp|Q962S0|RS7_SPOFR	190	9	187	56.8	183	75	4	199.1	5.4e-50	sp|Q962S0|RS7_SPOFR Small ribosomal subunit protein eS7 OS=Spodoptera frugiperda OX=7108 GN=RpS7 PE=2 SV=1
Unigene0000022	694	82	606	sp|P48155|RS7_MANSE	190	17	187	57.7	175	70	4	196.4	3.5e-49	sp|P48155|RS7_MANSE Small ribosomal subunit protein eS7 OS=Manduca sexta OX=7130 GN=RpS7 PE=2 SV=1
Unigene0000022	694	22	603	sp|Q9VA91|RS7_DROME	194	1	188	54.1	194	83	6	195.3	7.8e-49	sp|Q9VA91|RS7_DROME Small ribosomal subunit protein eS7 OS=Drosophila melanogaster OX=7227 GN=RpS7 PE=1 SV=1
Unigene0000022	694	22	603	sp|P62085|RS7_DROYA	194	1	188	53.6	194	84	6	193.7	2.3e-48	sp|P62085|RS7_DROYA Small ribosomal subunit protein eS7 OS=Drosophila yakuba OX=7245 GN=RpS7 PE=2 SV=1
Unigene0000022	694	64	606	sp|Q9NB21|RS7_CULQU	192	13	189	55.8	181	76	4	192.2	6.6e-48	sp|Q9NB21|RS7_CULQU Small ribosomal subunit protein eS7 OS=Culex quinquefasciatus OX=7176 GN=RpS7 PE=2 SV=1
Unigene0000031	308	277	71	sp|Q02921|NO93_SOYBN	105	29	97	85.5	69	10	0	108.2	5.6e-23	sp|Q02921|NO93_SOYBN Early nodulin-93 OS=Glycine max OX=3847 PE=2 SV=1
Unigene0000041	1120	53	982	sp|Q94K71|CBBY_ARATH	319	19	318	68.7	310	87	10	409.8	3.3e-113	sp|Q94K71|CBBY_ARATH CBBY-like protein OS=Arabidopsis thaliana OX=3702 GN=CBBY PE=1 SV=1
Unigene0000041	1120	260	907	sp|Q680K2|GPPL1_ARATH	316	65	294	39	231	125	16	160.6	3.5e-38	sp|Q680K2|GPPL1_ARATH Haloacid dehalogenase-like hydrolase domain-containing protein At4g39970 OS=Arabidopsis thaliana OX=3702 GN=At4g39970 PE=2 SV=1
Unigene0000041	1120	260	931	sp|P40119|CBBYC_CUPNH	254	3	223	38.2	225	134	5	139	1.1e-31	sp|P40119|CBBYC_CUPNH Protein CbbY, chromosomal OS=Cupriavidus necator (strain ATCC 17699 / DSM 428 / KCTC 22496 / NCIMB 10442 / H16 / Stanier 337) OX=381666 GN=cbbYC PE=3 SV=3
Unigene0000041	1120	260	871	sp|P54607|YHCW_BACSU	220	4	189	30.4	204	124	18	80.5	4.5e-14	sp|P54607|YHCW_BACSU Putative phosphatase YhcW OS=Bacillus subtilis (strain 168) OX=224308 GN=yhcW PE=3 SV=1
Unigene0000041	1120	260	853	sp|Q7ADF8|HXPB_ECO57	222	9	190	29.3	198	124	16	70.1	6.1e-11	sp|Q7ADF8|HXPB_ECO57 Hexitol phosphatase B OS=Escherichia coli O157:H7 OX=83334 GN=hxpB PE=3 SV=1
Unigene0000041	1120	260	853	sp|P77247|HXPB_ECOLI	222	9	190	29.3	198	124	16	70.1	6.1e-11	sp|P77247|HXPB_ECOLI Hexitol phosphatase B OS=Escherichia coli (strain K12) OX=83333 GN=hxpB PE=1 SV=1
Unigene0000041	1120	254	868	sp|Q4K4Z4|GPH_PSEF5	272	13	204	27.7	220	116	43	57	5.4e-07	sp|Q4K4Z4|GPH_PSEF5 Phosphoglycolate phosphatase OS=Pseudomonas fluorescens (strain ATCC BAA-477 / NRRL B-23932 / Pf-5) OX=220664 GN=PFL_5630 PE=3 SV=1
Unigene0000041	1120	254	868	sp|Q3K5U8|GPH_PSEPF	272	13	204	26.2	214	127	31	53.1	7.8e-06	sp|Q3K5U8|GPH_PSEPF Phosphoglycolate phosphatase OS=Pseudomonas fluorescens (strain Pf0-1) OX=205922 GN=Pfl01_5119 PE=3 SV=1
Unigene0000043	1106	1065	133	sp|Q9FLC0|PER52_ARATH	324	8	324	64.4	317	107	6	390.2	2.6e-107	sp|Q9FLC0|PER52_ARATH Peroxidase 52 OS=Arabidopsis thaliana OX=3702 GN=PER52 PE=2 SV=1
Unigene0000043	1106	1014	133	sp|P00434|PERP7_BRARR	296	1	296	65.5	296	100	2	383.3	3.2e-105	sp|P00434|PERP7_BRARR Peroxidase P7 OS=Brassica rapa subsp. rapa OX=51350 PE=1 SV=3
Unigene0000043	1106	1062	133	sp|A7NY33|PER4_VITVI	321	10	321	61.9	312	117	2	380.9	1.6e-104	sp|A7NY33|PER4_VITVI Peroxidase 4 OS=Vitis vinifera OX=29760 GN=GSVIVT00023967001 PE=1 SV=1
Unigene0000043	1106	1059	133	sp|P22195|PER1_ARAHY	316	10	316	61.8	309	116	2	378.6	8.0e-104	sp|P22195|PER1_ARAHY Cationic peroxidase 1 OS=Arachis hypogaea OX=3818 GN=PNC1 PE=1 SV=2
Unigene0000043	1106	1077	133	sp|A5H452|PER70_MAIZE	321	4	321	57.5	318	132	3	364.8	1.2e-99	sp|A5H452|PER70_MAIZE Peroxidase 70 OS=Zea mays OX=4577 GN=PER70 PE=1 SV=1
Unigene0000043	1106	1053	130	sp|Q7F1U0|PER22_ORYSJ	317	13	317	61	310	114	7	360.9	1.7e-98	sp|Q7F1U0|PER22_ORYSJ Peroxidase 22.3 OS=Oryza sativa subsp. japonica OX=39947 GN=POX22.3 PE=2 SV=1
Unigene0000043	1106	1080	133	sp|Q0D3N0|PER2_ORYSJ	314	1	314	58.9	319	123	8	356.7	3.2e-97	sp|Q0D3N0|PER2_ORYSJ Peroxidase 2 OS=Oryza sativa subsp. japonica OX=39947 GN=PRX112 PE=2 SV=1
Unigene0000043	1106	1080	133	sp|A2YPX3|PER2_ORYSI	314	1	314	58.6	319	124	8	355.1	9.4e-97	sp|A2YPX3|PER2_ORYSI Peroxidase 2 OS=Oryza sativa subsp. indica OX=39946 GN=PRX112 PE=3 SV=2
Unigene0000043	1106	1062	133	sp|Q9LVL2|PER67_ARATH	316	4	316	56.9	313	132	3	347.8	1.5e-94	sp|Q9LVL2|PER67_ARATH Peroxidase 67 OS=Arabidopsis thaliana OX=3702 GN=PER67 PE=2 SV=1
Unigene0000043	1106	1053	133	sp|Q9LVL1|PER68_ARATH	325	16	325	58.4	310	126	3	346.3	4.4e-94	sp|Q9LVL1|PER68_ARATH Peroxidase 68 OS=Arabidopsis thaliana OX=3702 GN=PER68 PE=2 SV=1
Unigene0000043	1106	1074	133	sp|Q02200|PERX_NICSY	322	7	322	55.4	316	139	2	346.3	4.4e-94	sp|Q02200|PERX_NICSY Lignin-forming anionic peroxidase OS=Nicotiana sylvestris OX=4096 PE=2 SV=1
Unigene0000043	1106	1062	136	sp|Q40372|RIP1_MEDTR	325	9	324	56.5	317	129	9	335.5	7.7e-91	sp|Q40372|RIP1_MEDTR Peroxidase RIP1 OS=Medicago truncatula OX=3880 GN=RIP1 PE=2 SV=1
Unigene0000043	1106	1065	130	sp|Q05855|PER1_WHEAT	312	7	312	56.4	314	127	10	332	8.5e-90	sp|Q05855|PER1_WHEAT Peroxidase OS=Triticum aestivum OX=4565 PE=2 SV=1
Unigene0000043	1106	1032	130	sp|A5H453|PER42_MAIZE	321	24	320	55.3	302	129	6	328.6	9.4e-89	sp|A5H453|PER42_MAIZE Peroxidase 42 OS=Zea mays OX=4577 GN=PER42 PE=2 SV=1
Unigene0000043	1106	1047	130	sp|A5H454|PER66_MAIZE	320	19	320	56	307	129	6	325.1	1.0e-87	sp|A5H454|PER66_MAIZE Peroxidase 66 OS=Zea mays OX=4577 GN=PER66 PE=1 SV=1
Unigene0000043	1106	1083	130	sp|O23237|PER49_ARATH	331	3	331	51.1	329	150	11	316.6	3.7e-85	sp|O23237|PER49_ARATH Peroxidase 49 OS=Arabidopsis thaliana OX=3702 GN=PER49 PE=2 SV=2
Unigene0000043	1106	1080	133	sp|Q9M9Q9|PER5_ARATH	321	1	321	52	321	149	5	315.5	8.3e-85	sp|Q9M9Q9|PER5_ARATH Peroxidase 5 OS=Arabidopsis thaliana OX=3702 GN=PER5 PE=3 SV=2
Unigene0000043	1106	1026	133	sp|Q96512|PER9_ARATH	346	40	346	53.1	307	135	9	312.4	7.0e-84	sp|Q96512|PER9_ARATH Peroxidase 9 OS=Arabidopsis thaliana OX=3702 GN=PER9 PE=1 SV=1
Unigene0000043	1106	1083	130	sp|Q9SI16|PER15_ARATH	338	3	337	48.4	337	153	21	310.1	3.5e-83	sp|Q9SI16|PER15_ARATH Peroxidase 15 OS=Arabidopsis thaliana OX=3702 GN=PER15 PE=2 SV=1
Unigene0000043	1106	1080	130	sp|P27337|PER1_HORVU	315	1	315	53	321	141	10	309.3	5.9e-83	sp|P27337|PER1_HORVU Peroxidase 1 OS=Hordeum vulgare OX=4513 PE=2 SV=1
Unigene0000044	1956	821	1720	sp|Q1MTP1|THP3_SCHPO	395	102	395	53.3	304	128	14	312.4	1.2e-83	sp|Q1MTP1|THP3_SCHPO THP3 homolog C2A9.11c OS=Schizosaccharomyces pombe (strain 972 / ATCC 24843) OX=284812 GN=SPBC2A9.11c PE=3 SV=1
Unigene0000044	1956	662	1588	sp|Q32NW2|LENG8_XENLA	800	457	773	41.7	319	174	12	241.9	2.1e-62	sp|Q32NW2|LENG8_XENLA Leukocyte receptor cluster member 8 homolog OS=Xenopus laevis OX=8355 GN=leng8 PE=2 SV=1
Unigene0000044	1956	752	1558	sp|A4QNR8|LENG8_DANRE	839	541	802	46.5	271	134	11	236.1	1.1e-60	sp|A4QNR8|LENG8_DANRE Leukocyte receptor cluster member 8 homolog OS=Danio rerio OX=7955 GN=leng8 PE=2 SV=1
Unigene0000044	1956	611	1588	sp|Q96PV6|LENG8_HUMAN	800	435	773	40.6	340	187	15	233.4	7.3e-60	sp|Q96PV6|LENG8_HUMAN Leukocyte receptor cluster member 8 OS=Homo sapiens OX=9606 GN=LENG8 PE=1 SV=3
Unigene0000044	1956	611	1513	sp|Q8CBY3|LENG8_MOUSE	785	436	749	42.5	315	166	15	224.9	2.6e-57	sp|Q8CBY3|LENG8_MOUSE Leukocyte receptor cluster member 8 homolog OS=Mus musculus OX=10090 GN=Leng8 PE=1 SV=1
Unigene0000044	1956	791	1690	sp|F4IUY8|SAC3A_ARATH	1006	677	978	40.3	305	174	8	204.9	2.8e-51	sp|F4IUY8|SAC3A_ARATH SAC3 family protein A OS=Arabidopsis thaliana OX=3702 GN=SAC3A PE=1 SV=1
Unigene0000044	1956	917	1717	sp|Q12049|THP3_YEAST	470	189	469	36.9	282	162	16	181.8	2.5e-44	sp|Q12049|THP3_YEAST Protein THP3 OS=Saccharomyces cerevisiae (strain ATCC 204508 / S288c) OX=559292 GN=THP3 PE=1 SV=1
Unigene0000048	4813	2347	1688	sp|Q16773|KAT1_HUMAN	422	181	415	35.3	238	133	21	155.6	4.8e-36	sp|Q16773|KAT1_HUMAN Kynurenine--oxoglutarate transaminase 1 OS=Homo sapiens OX=9606 GN=KYAT1 PE=1 SV=1
Unigene0000048	4813	2347	1679	sp|Q54KM6|KAT_DICDI	435	194	433	35.4	243	134	23	155.2	6.2e-36	sp|Q54KM6|KAT_DICDI Kynurenine--oxoglutarate transaminase OS=Dictyostelium discoideum OX=44689 GN=ccbl PE=3 SV=1
Unigene0000048	4813	2347	1694	sp|Q0P5G4|KAT3_BOVIN	455	214	445	34.7	239	128	28	152.5	4.0e-35	sp|Q0P5G4|KAT3_BOVIN Kynurenine--oxoglutarate transaminase 3 OS=Bos taurus OX=9913 GN=KYAT3 PE=2 SV=1
Unigene0000048	4813	2347	1694	sp|Q6YP21|KAT3_HUMAN	454	214	444	33.8	234	136	19	151	1.2e-34	sp|Q6YP21|KAT3_HUMAN Kynurenine--oxoglutarate transaminase 3 OS=Homo sapiens OX=9606 GN=KYAT3 PE=1 SV=1
Unigene0000048	4813	2347	1688	sp|Q8BTY1|KAT1_MOUSE	424	181	415	34.9	238	134	21	150.2	2.0e-34	sp|Q8BTY1|KAT1_MOUSE Kynurenine--oxoglutarate transaminase 1 OS=Mus musculus OX=10090 GN=Kyat1 PE=1 SV=1
Unigene0000048	4813	4604	4245	sp|Q8BTY1|KAT1_MOUSE	424	16	140	34.4	125	77	5	78.2	9.7e-13	sp|Q8BTY1|KAT1_MOUSE Kynurenine--oxoglutarate transaminase 1 OS=Mus musculus OX=10090 GN=Kyat1 PE=1 SV=1
Unigene0000048	4813	2347	1676	sp|P9WPZ4|DAPC_MYCTO	397	166	392	36.7	229	138	7	148.7	5.8e-34	sp|P9WPZ4|DAPC_MYCTO Probable N-succinyldiaminopimelate aminotransferase DapC OS=Mycobacterium tuberculosis (strain CDC 1551 / Oshkosh) OX=83331 GN=dapC PE=1 SV=1
Unigene0000048	4813	2347	1676	sp|P9WPZ5|DAPC_MYCTU	397	166	392	36.7	229	138	7	148.7	5.8e-34	sp|P9WPZ5|DAPC_MYCTU Probable N-succinyldiaminopimelate aminotransferase DapC OS=Mycobacterium tuberculosis (strain ATCC 25618 / H37Rv) OX=83332 GN=dapC PE=1 SV=1
Unigene0000048	4813	2347	1688	sp|Q08415|KAT1_RAT	423	181	415	32.8	238	139	21	146.4	2.9e-33	sp|Q08415|KAT1_RAT Kynurenine--oxoglutarate transaminase 1 OS=Rattus norvegicus OX=10116 GN=Kyat1 PE=1 SV=2
Unigene0000048	4813	4592	4245	sp|Q08415|KAT1_RAT	423	20	140	34.7	121	74	5	80.5	2.0e-13	sp|Q08415|KAT1_RAT Kynurenine--oxoglutarate transaminase 1 OS=Rattus norvegicus OX=10116 GN=Kyat1 PE=1 SV=2
Unigene0000048	4813	2347	1694	sp|Q58FK9|KAT3_RAT	454	214	444	33.3	234	137	19	146	3.8e-33	sp|Q58FK9|KAT3_RAT Kynurenine--oxoglutarate transaminase 3 OS=Rattus norvegicus OX=10116 GN=Kyat3 PE=2 SV=1
Unigene0000048	4813	2347	1694	sp|Q71RI9|KAT3_MOUSE	455	215	445	32.5	234	139	19	143.7	1.9e-32	sp|Q71RI9|KAT3_MOUSE Kynurenine--oxoglutarate transaminase 3 OS=Mus musculus OX=10090 GN=Kyat3 PE=1 SV=1
Unigene0000048	4813	2347	1670	sp|Q17CS8|KAT_AEDAE	477	237	476	32.7	245	141	24	142.5	4.2e-32	sp|Q17CS8|KAT_AEDAE Kynurenine aminotransferase OS=Aedes aegypti OX=7159 GN=KAT PE=1 SV=1
Unigene0000048	4813	2347	1700	sp|Q7T3E5|KAT3_DANRE	450	212	440	33.6	232	135	19	140.2	2.1e-31	sp|Q7T3E5|KAT3_DANRE Kynurenine--oxoglutarate transaminase 3 OS=Danio rerio OX=7955 GN=kyat3 PE=2 SV=2
Unigene0000048	4813	2347	1655	sp|C6C2Z3|AAT_MUSP7	400	172	396	34.3	233	143	10	132.9	3.3e-29	sp|C6C2Z3|AAT_MUSP7 Aspartate aminotransferase OS=Musicola paradisiaca (strain Ech703) OX=579405 GN=Dd703_1457 PE=1 SV=1
Unigene0000048	4813	2347	1787	sp|P53001|AAT1_BACSU	393	170	361	35.4	192	119	5	129	4.8e-28	sp|P53001|AAT1_BACSU Aspartate aminotransferase OS=Bacillus subtilis (strain 168) OX=224308 GN=aspB PE=3 SV=1
Unigene0000048	4813	2341	1688	sp|P16524|DAPX_BACSU	393	170	375	34.4	218	131	12	127.5	1.4e-27	sp|P16524|DAPX_BACSU Probable N-acetyl-LL-diaminopimelate aminotransferase OS=Bacillus subtilis (strain 168) OX=224308 GN=dapX PE=1 SV=3
Unigene0000048	4813	2347	1787	sp|Q59228|AAT_GEOSE	393	170	361	34.7	193	119	7	125.6	5.3e-27	sp|Q59228|AAT_GEOSE Aspartate aminotransferase OS=Geobacillus stearothermophilus OX=1422 GN=aspC PE=3 SV=1
Unigene0000048	4813	2347	1787	sp|P23034|AAT_BACY2	392	172	363	33.7	193	121	7	117.1	1.9e-24	sp|P23034|AAT_BACY2 Aspartate aminotransferase OS=Bacillus sp. (strain YM-2) OX=72580 PE=1 SV=1
Unigene0000048	4813	2347	1787	sp|Q9V0L2|AAT_PYRAB	389	167	353	34.4	189	120	4	117.1	1.9e-24	sp|Q9V0L2|AAT_PYRAB Aspartate aminotransferase OS=Pyrococcus abyssi (strain GE5 / Orsay) OX=272844 GN=aspC PE=3 SV=1
Unigene0000048	4813	2347	1787	sp|H3ZPU1|ARAT2_THELN	389	167	353	33.9	189	121	4	117.1	1.9e-24	sp|H3ZPU1|ARAT2_THELN Aromatic-amino-acid aminotransferase 2 OS=Thermococcus litoralis (strain ATCC 51850 / DSM 5473 / JCM 8560 / NS-C) OX=523849 GN=OCC_04737 PE=1 SV=1
Unigene0000048	4813	2347	1787	sp|Q55128|AAT_SYNY3	389	170	357	31.2	189	127	3	112.1	6.1e-23	sp|Q55128|AAT_SYNY3 Aspartate aminotransferase OS=Synechocystis sp. (strain PCC 6803 / Kazusa) OX=1111708 GN=aspC PE=1 SV=1
Unigene0000049	2204	148	363	sp|P50888|RL24_HORVU	162	1	72	86.1	72	10	0	135.2	3.1e-30	sp|P50888|RL24_HORVU Large ribosomal subunit protein eL24 OS=Hordeum vulgare OX=4513 GN=RPL24 PE=2 SV=1
Unigene0000049	2204	357	485	sp|P50888|RL24_HORVU	162	71	113	88.4	43	5	0	73.9	8.4e-12	sp|P50888|RL24_HORVU Large ribosomal subunit protein eL24 OS=Hordeum vulgare OX=4513 GN=RPL24 PE=2 SV=1
Unigene0000049	2204	148	363	sp|Q9FUL4|RL24_PRUAV	186	1	72	84.7	72	11	0	131.3	4.4e-29	sp|Q9FUL4|RL24_PRUAV Large ribosomal subunit protein eL24 OS=Prunus avium OX=42229 GN=RPL24 PE=2 SV=1
Unigene0000049	2204	357	485	sp|Q9FUL4|RL24_PRUAV	186	71	113	88.4	43	5	0	74.7	4.9e-12	sp|Q9FUL4|RL24_PRUAV Large ribosomal subunit protein eL24 OS=Prunus avium OX=42229 GN=RPL24 PE=2 SV=1
Unigene0000049	2204	148	414	sp|O65743|RL24_CICAR	164	1	93	68.8	93	25	4	125.9	1.9e-27	sp|O65743|RL24_CICAR Large ribosomal subunit protein eL24 OS=Cicer arietinum OX=3827 GN=RPL24 PE=2 SV=1
Unigene0000049	2204	357	485	sp|O65743|RL24_CICAR	164	71	113	90.7	43	4	0	75.9	2.2e-12	sp|O65743|RL24_CICAR Large ribosomal subunit protein eL24 OS=Cicer arietinum OX=3827 GN=RPL24 PE=2 SV=1
Unigene0000049	2204	148	363	sp|P38666|RL242_ARATH	163	1	72	77.8	72	16	0	122.5	2.1e-26	sp|P38666|RL242_ARATH Large ribosomal subunit protein eL24y OS=Arabidopsis thaliana OX=3702 GN=RPL24B PE=1 SV=2
Unigene0000049	2204	357	485	sp|P38666|RL242_ARATH	163	71	113	86	43	6	0	72.8	1.9e-11	sp|P38666|RL242_ARATH Large ribosomal subunit protein eL24y OS=Arabidopsis thaliana OX=3702 GN=RPL24B PE=1 SV=2
Unigene0000049	2204	148	363	sp|Q42347|RL241_ARATH	164	1	72	77.8	72	16	0	122.1	2.7e-26	sp|Q42347|RL241_ARATH Large ribosomal subunit protein eL24z OS=Arabidopsis thaliana OX=3702 GN=RPL24A PE=1 SV=2
Unigene0000049	2204	357	485	sp|Q42347|RL241_ARATH	164	71	113	86	43	6	0	72.8	1.9e-11	sp|Q42347|RL241_ARATH Large ribosomal subunit protein eL24z OS=Arabidopsis thaliana OX=3702 GN=RPL24A PE=1 SV=2
Unigene0000049	2204	154	453	sp|Q6BNC2|RL24_DEBHA	156	1	97	44.7	103	48	9	86.7	1.2e-15	sp|Q6BNC2|RL24_DEBHA Large ribosomal subunit protein eL24 OS=Debaryomyces hansenii (strain ATCC 36239 / CBS 767 / BCRC 21394 / JCM 1990 / NBRC 0083 / IGC 2968) OX=284592 GN=RPL24 PE=3 SV=1
Unigene0000049	2204	154	414	sp|Q54VN6|RL24_DICDI	127	1	90	35.6	90	55	3	67.4	7.8e-10	sp|Q54VN6|RL24_DICDI Large ribosomal subunit protein eL24 OS=Dictyostelium discoideum OX=44689 GN=rpl24 PE=1 SV=1
Unigene0000057	422	382	8	sp|P46600|HAT1_ARATH	282	4	127	48.9	131	54	13	78.6	6.5e-14	sp|P46600|HAT1_ARATH Homeobox-leucine zipper protein HAT1 OS=Arabidopsis thaliana OX=3702 GN=HAT1 PE=1 SV=1
Unigene0000057	422	382	5	sp|P46601|HAT2_ARATH	283	4	124	47.8	134	49	21	74.7	9.3e-13	sp|P46601|HAT2_ARATH Homeobox-leucine zipper protein HAT2 OS=Arabidopsis thaliana OX=3702 GN=HAT2 PE=1 SV=2
Unigene0000057	422	373	2	sp|Q05466|HAT4_ARATH	284	7	125	42.4	132	55	21	59.7	3.1e-08	sp|Q05466|HAT4_ARATH Homeobox-leucine zipper protein HAT4 OS=Arabidopsis thaliana OX=3702 GN=HAT4 PE=1 SV=1
Unigene0000057	422	379	5	sp|P46602|HAT3_ARATH	315	3	152	39.2	153	62	31	51.6	8.5e-06	sp|P46602|HAT3_ARATH Homeobox-leucine zipper protein HAT3 OS=Arabidopsis thaliana OX=3702 GN=HAT3 PE=1 SV=2
Unigene0000058	708	78	482	sp|P0CU28|RS24_CHATD	136	1	135	83	135	23	0	205.7	5.9e-52	sp|P0CU28|RS24_CHATD Small ribosomal subunit protein eS24 OS=Chaetomium thermophilum (strain DSM 1495 / CBS 144.50 / IMI 039719) OX=759272 GN=CTHT_0041970.2 PE=1 SV=1
Unigene0000058	708	99	455	sp|P0CX31|RS24A_YEAST	135	5	123	63.9	119	43	0	151.8	1.0e-35	sp|P0CX31|RS24A_YEAST Small ribosomal subunit protein eS24A OS=Saccharomyces cerevisiae (strain ATCC 204508 / S288c) OX=559292 GN=RPS24A PE=1 SV=1
Unigene0000058	708	99	455	sp|P0CX32|RS24B_YEAST	135	5	123	63.9	119	43	0	151.8	1.0e-35	sp|P0CX32|RS24B_YEAST Small ribosomal subunit protein eS24B OS=Saccharomyces cerevisiae (strain ATCC 204508 / S288c) OX=559292 GN=RPS24B PE=1 SV=1
Unigene0000058	708	99	398	sp|Q5A7K0|RS24_CANAL	135	5	104	70	100	30	0	149.4	5.0e-35	sp|Q5A7K0|RS24_CANAL Small ribosomal subunit protein eS24 OS=Candida albicans (strain SC5314 / ATCC MYA-2876) OX=237561 GN=RPS24 PE=1 SV=1
Unigene0000058	708	99	482	sp|O59865|RS24B_SCHPO	134	5	132	57	128	55	0	148.7	8.6e-35	sp|O59865|RS24B_SCHPO Small ribosomal subunit protein eS24B OS=Schizosaccharomyces pombe (strain 972 / ATCC 24843) OX=284812 GN=rps2402 PE=2 SV=3
Unigene0000058	708	99	482	sp|O13784|RS24A_SCHPO	134	5	132	57	128	55	0	147.5	1.9e-34	sp|O13784|RS24A_SCHPO Small ribosomal subunit protein eS24A OS=Schizosaccharomyces pombe (strain 972 / ATCC 24843) OX=284812 GN=rps2401 PE=3 SV=3
Unigene0000058	708	90	476	sp|P14249|RS24_MUCCL	148	21	148	52.7	129	60	1	138.7	8.9e-32	sp|P14249|RS24_MUCCL Small ribosomal subunit protein eS24 OS=Mucor circinelloides f. lusitanicus OX=29924 GN=RPS24 PE=3 SV=1
Unigene0000058	708	90	482	sp|O42387|RS24_TAKRU	132	2	132	59.1	132	52	2	131.7	1.1e-29	sp|O42387|RS24_TAKRU Small ribosomal subunit protein eS24 OS=Takifugu rubripes OX=31033 GN=rps24 PE=3 SV=1
Unigene0000058	708	90	479	sp|Q90YQ0|RS24_ICTPU	131	2	131	60.3	131	50	2	128.6	9.2e-29	sp|Q90YQ0|RS24_ICTPU Small ribosomal subunit protein eS24 OS=Ictalurus punctatus OX=7998 GN=rps24 PE=2 SV=1
Unigene0000058	708	90	479	sp|Q56JU9|RS24_BOVIN	131	2	131	55.7	131	56	2	127.9	1.6e-28	sp|Q56JU9|RS24_BOVIN Small ribosomal subunit protein eS24 OS=Bos taurus OX=9913 GN=RPS24 PE=2 SV=2
Unigene0000058	708	90	479	sp|Q5RAQ8|RS24_PONAB	131	2	131	55.7	131	56	2	127.9	1.6e-28	sp|Q5RAQ8|RS24_PONAB Small ribosomal subunit protein eS24 OS=Pongo abelii OX=9601 GN=RPS24 PE=2 SV=1
Unigene0000058	708	99	482	sp|Q9SS17|RS241_ARATH	133	6	133	51.2	129	61	2	127.5	2.0e-28	sp|Q9SS17|RS241_ARATH Small ribosomal subunit protein eS24z OS=Arabidopsis thaliana OX=3702 GN=RPS24A PE=2 SV=1
Unigene0000058	708	90	482	sp|P02377|RS24_XENLA	132	2	132	54.5	132	58	2	127.5	2.0e-28	sp|P02377|RS24_XENLA Small ribosomal subunit protein eS24 OS=Xenopus laevis OX=8355 GN=rps24 PE=1 SV=1
Unigene0000058	708	90	482	sp|P62847|RS24_HUMAN	133	2	133	54.9	133	57	3	126.7	3.5e-28	sp|P62847|RS24_HUMAN Small ribosomal subunit protein eS24 OS=Homo sapiens OX=9606 GN=RPS24 PE=1 SV=1
Unigene0000058	708	90	482	sp|P62848|RS24_MESAU	133	2	133	54.9	133	57	3	126.7	3.5e-28	sp|P62848|RS24_MESAU Small ribosomal subunit protein eS24 OS=Mesocricetus auratus OX=10036 GN=RPS24 PE=3 SV=1
Unigene0000058	708	90	482	sp|P62849|RS24_MOUSE	133	2	133	54.9	133	57	3	126.7	3.5e-28	sp|P62849|RS24_MOUSE Small ribosomal subunit protein eS24 OS=Mus musculus OX=10090 GN=Rps24 PE=1 SV=1
Unigene0000058	708	90	482	sp|A0A5F9D2E6|RS24_RABIT	133	2	133	54.9	133	57	3	126.7	3.5e-28	sp|A0A5F9D2E6|RS24_RABIT Small ribosomal subunit protein eS24 OS=Oryctolagus cuniculus OX=9986 GN=RPS24 PE=1 SV=1
Unigene0000058	708	90	482	sp|P62850|RS24_RAT	133	2	133	54.9	133	57	3	126.7	3.5e-28	sp|P62850|RS24_RAT Small ribosomal subunit protein eS24 OS=Rattus norvegicus OX=10116 GN=Rps24 PE=1 SV=1
Unigene0000058	708	90	479	sp|Q4R5H5|RS24_MACFA	131	2	131	55	131	57	2	125.2	1.0e-27	sp|Q4R5H5|RS24_MACFA Small ribosomal subunit protein eS24 OS=Macaca fascicularis OX=9541 GN=RPS24 PE=2 SV=1
Unigene0000058	708	90	383	sp|Q9W6X9|RS24_ORYLA	132	2	99	61.2	98	38	0	121.7	1.1e-26	sp|Q9W6X9|RS24_ORYLA Small ribosomal subunit protein eS24 OS=Oryzias latipes OX=8090 GN=rps24 PE=2 SV=1
Unigene0000065	706	617	249	sp|P50886|RL22_XENLA	128	1	127	54.3	127	54	4	140.2	3.0e-32	sp|P50886|RL22_XENLA Large ribosomal subunit protein eL22 OS=Xenopus laevis OX=8355 GN=rpl22 PE=1 SV=2
Unigene0000065	706	617	249	sp|Q28IL6|RL22_XENTR	128	1	127	54.3	127	54	4	140.2	3.0e-32	sp|Q28IL6|RL22_XENTR Large ribosomal subunit protein eL22 OS=Xenopus tropicalis OX=8364 GN=rpl22 PE=2 SV=3
Unigene0000065	706	617	249	sp|Q4R5I3|RL22_MACFA	128	1	127	54.3	127	54	4	138.7	8.9e-32	sp|Q4R5I3|RL22_MACFA Large ribosomal subunit protein eL22 OS=Macaca fascicularis OX=9541 GN=RPL22 PE=1 SV=3
Unigene0000065	706	617	249	sp|P67984|RL22_MOUSE	128	1	127	54.3	127	54	4	138.7	8.9e-32	sp|P67984|RL22_MOUSE Large ribosomal subunit protein eL22 OS=Mus musculus OX=10090 GN=Rpl22 PE=1 SV=2
Unigene0000065	706	617	249	sp|P67985|RL22_PIG	128	1	127	54.3	127	54	4	138.7	8.9e-32	sp|P67985|RL22_PIG Large ribosomal subunit protein eL22 OS=Sus scrofa OX=9823 GN=RPL22 PE=1 SV=2
Unigene0000065	706	617	249	sp|P35268|RL22_HUMAN	128	1	127	54.3	127	54	4	138.3	1.2e-31	sp|P35268|RL22_HUMAN Large ribosomal subunit protein eL22 OS=Homo sapiens OX=9606 GN=RPL22 PE=1 SV=2
Unigene0000065	706	617	249	sp|P47198|RL22_RAT	128	1	127	54.3	127	54	4	136.3	4.4e-31	sp|P47198|RL22_RAT Large ribosomal subunit protein eL22 OS=Rattus norvegicus OX=10116 GN=Rpl22 PE=2 SV=2
Unigene0000065	706	617	249	sp|Q90YU6|RL22_ICTPU	128	1	127	52.8	127	56	4	134.4	1.7e-30	sp|Q90YU6|RL22_ICTPU Large ribosomal subunit protein eL22 OS=Ictalurus punctatus OX=7998 GN=rpl22 PE=2 SV=3
Unigene0000065	706	617	249	sp|Q98TF8|RL22_CHICK	128	1	127	52	127	57	4	131.7	1.1e-29	sp|Q98TF8|RL22_CHICK Large ribosomal subunit protein eL22 OS=Gallus gallus OX=9031 GN=RPL22 PE=2 SV=1
Unigene0000065	706	584	255	sp|Q09668|RL22_SCHPO	117	7	116	57.3	110	47	0	129	7.0e-29	sp|Q09668|RL22_SCHPO Large ribosomal subunit protein eL22 OS=Schizosaccharomyces pombe (strain 972 / ATCC 24843) OX=284812 GN=rpl22 PE=1 SV=3
Unigene0000065	706	617	264	sp|P52865|RL22_GADMO	125	1	119	52.1	119	56	1	126.3	4.5e-28	sp|P52865|RL22_GADMO Large ribosomal subunit protein eL22 (Fragment) OS=Gadus morhua OX=8049 GN=rpl22 PE=2 SV=2
Unigene0000065	706	617	249	sp|G1TSG1|RL22_RABIT	128	1	127	49.6	127	60	4	124	2.3e-27	sp|G1TSG1|RL22_RABIT Large ribosomal subunit protein eL22 OS=Oryctolagus cuniculus OX=9986 GN=RPL22 PE=1 SV=1
Unigene0000065	706	587	249	sp|P13732|RL22_TRIGR	130	19	130	51.3	113	54	1	123.2	3.8e-27	sp|P13732|RL22_TRIGR Large ribosomal subunit protein eL22 OS=Tripneustes gratilla OX=7673 GN=RPL22 PE=2 SV=1
Unigene0000065	706	617	249	sp|Q9D7S7|RL22L_MOUSE	122	1	121	48	123	62	2	122.1	8.6e-27	sp|Q9D7S7|RL22L_MOUSE Ribosomal protein eL22-like 1 OS=Mus musculus OX=10090 GN=Rpl22l1 PE=1 SV=1
Unigene0000065	706	617	249	sp|Q5I0R6|RL22L_XENTR	120	1	120	49.6	123	59	3	121.3	1.5e-26	sp|Q5I0R6|RL22L_XENTR Ribosomal protein eL22-like 1 OS=Xenopus tropicalis OX=8364 GN=rpl22l1 PE=2 SV=1
Unigene0000065	706	584	258	sp|Q54JE3|RL221_DICDI	116	10	116	56	109	46	2	120.6	2.5e-26	sp|Q54JE3|RL221_DICDI Large ribosomal subunit protein eL22A OS=Dictyostelium discoideum OX=44689 GN=rpl22 PE=3 SV=1
Unigene0000065	706	584	258	sp|Q54GK6|RL222_DICDI	116	10	116	55	109	47	2	117.1	2.8e-25	sp|Q54GK6|RL222_DICDI Large ribosomal subunit protein eL22B OS=Dictyostelium discoideum OX=44689 GN=rpl22a PE=3 SV=1
Unigene0000065	706	617	249	sp|Q6P5R6|RL22L_HUMAN	122	1	121	46.3	123	64	2	117.1	2.8e-25	sp|Q6P5R6|RL22L_HUMAN Ribosomal protein eL22-like OS=Homo sapiens OX=9606 GN=RPL22L1 PE=1 SV=2
Unigene0000065	706	617	249	sp|A4FUH0|RL22L_BOVIN	122	1	121	47.2	123	63	2	115.5	8.0e-25	sp|A4FUH0|RL22L_BOVIN Ribosomal protein eL22-like OS=Bos taurus OX=9913 GN=RPL22L1 PE=2 SV=1
Unigene0000065	706	605	249	sp|P52819|RL22_CAEEL	130	11	130	47.9	121	60	3	114	2.3e-24	sp|P52819|RL22_CAEEL Large ribosomal subunit protein eL22 OS=Caenorhabditis elegans OX=6239 GN=rpl-22 PE=1 SV=3
Unigene0000073	1108	138	989	sp|Q65XV8|RK176_ORYSJ	395	55	353	46.2	301	143	19	263.8	2.9e-69	sp|Q65XV8|RK176_ORYSJ Receptor-like cytoplasmic kinase 176 OS=Oryza sativa subsp. japonica OX=39947 GN=RLCK176 PE=1 SV=1
Unigene0000073	1108	138	989	sp|P46573|PBL10_ARATH	412	54	352	47.8	301	138	19	262.3	8.3e-69	sp|P46573|PBL10_ARATH Probable serine/threonine-protein kinase PBL10 OS=Arabidopsis thaliana OX=3702 GN=PBL10 PE=1 SV=2
Unigene0000073	1108	138	989	sp|Q06548|PBL9_ARATH	410	53	351	46.8	301	141	19	261.2	1.9e-68	sp|Q06548|PBL9_ARATH Probable serine/threonine-protein kinase PBL9 OS=Arabidopsis thaliana OX=3702 GN=PBL9 PE=1 SV=1
Unigene0000073	1108	138	1019	sp|P43293|PBL11_ARATH	389	53	361	44.4	311	154	19	256.1	6.0e-67	sp|P43293|PBL11_ARATH Probable serine/threonine-protein kinase PBL11 OS=Arabidopsis thaliana OX=3702 GN=PBL11 PE=1 SV=2
Unigene0000073	1108	24	989	sp|Q5XF79|PBL18_ARATH	387	31	363	42.4	337	175	19	250.8	2.5e-65	sp|Q5XF79|PBL18_ARATH Probable serine/threonine-protein kinase PBL18 OS=Arabidopsis thaliana OX=3702 GN=PBL18 PE=2 SV=1
Unigene0000073	1108	138	989	sp|O48814|BIK1_ARATH	395	52	350	43.9	301	150	19	248.8	9.5e-65	sp|O48814|BIK1_ARATH Serine/threonine-protein kinase BIK1 OS=Arabidopsis thaliana OX=3702 GN=BIK1 PE=1 SV=1
Unigene0000073	1108	138	986	sp|Q8H186|PBL1_ARATH	389	46	344	44.2	301	148	20	247.7	2.1e-64	sp|Q8H186|PBL1_ARATH Probable serine/threonine-protein kinase PBL1 OS=Arabidopsis thaliana OX=3702 GN=PBL1 PE=1 SV=1
Unigene0000073	1108	138	989	sp|O49840|PBL3_ARATH	426	68	364	44.1	299	150	17	242.3	8.9e-63	sp|O49840|PBL3_ARATH Probable serine/threonine-protein kinase PBL3 OS=Arabidopsis thaliana OX=3702 GN=PBL3 PE=1 SV=1
Unigene0000073	1108	138	989	sp|O49839|PBL2_ARATH	426	71	367	44.1	299	150	17	241.1	2.0e-62	sp|O49839|PBL2_ARATH Probable serine/threonine-protein kinase PBL2 OS=Arabidopsis thaliana OX=3702 GN=PBL2 PE=1 SV=1
Unigene0000073	1108	138	989	sp|Q9SRH7|PBL35_ARATH	490	121	417	46	300	143	19	240.7	2.6e-62	sp|Q9SRH7|PBL35_ARATH Serine/threonine-protein kinase PBL35 OS=Arabidopsis thaliana OX=3702 GN=PBL35 PE=1 SV=1
Unigene0000073	1108	147	995	sp|Q8H1E3|PBL17_ARATH	442	78	370	44.7	302	139	28	240	4.4e-62	sp|Q8H1E3|PBL17_ARATH Probable serine/threonine-protein kinase PBL17 OS=Arabidopsis thaliana OX=3702 GN=PBL17 PE=1 SV=1
Unigene0000073	1108	138	989	sp|Q9LFP7|PBL34_ARATH	493	127	423	44.7	300	147	19	239.2	7.6e-62	sp|Q9LFP7|PBL34_ARATH Serine/threonine-protein kinase PBL34 OS=Arabidopsis thaliana OX=3702 GN=PBL34 PE=1 SV=1
Unigene0000073	1108	51	989	sp|F4J0D2|PBL36_ARATH	476	83	407	43.4	332	162	26	239.2	7.6e-62	sp|F4J0D2|PBL36_ARATH Serine/threonine-protein kinase PBL36 OS=Arabidopsis thaliana OX=3702 GN=PBL36 PE=1 SV=2
Unigene0000073	1108	138	1016	sp|Q9SII6|PIX13_ARATH	414	72	377	42.9	310	156	21	233.4	4.1e-60	sp|Q9SII6|PIX13_ARATH Probable serine/threonine-protein kinase PIX13 OS=Arabidopsis thaliana OX=3702 GN=PIX13 PE=1 SV=2
Unigene0000073	1108	147	989	sp|Q8GXZ3|PBL8_ARATH	410	57	347	42.8	299	145	26	226.5	5.1e-58	sp|Q8GXZ3|PBL8_ARATH Probable serine/threonine-protein kinase PBL8 OS=Arabidopsis thaliana OX=3702 GN=PBL8 PE=1 SV=1
Unigene0000073	1108	138	1016	sp|Q9ZUF4|RIPK_ARATH	462	72	374	40.9	308	162	20	214.2	2.6e-54	sp|Q9ZUF4|RIPK_ARATH Serine/threonine-protein kinase RIPK OS=Arabidopsis thaliana OX=3702 GN=RIPK PE=1 SV=1
Unigene0000073	1108	138	1007	sp|Q9SY91|PBL15_ARATH	424	84	383	41.6	305	158	20	212.6	7.6e-54	sp|Q9SY91|PBL15_ARATH Probable serine/threonine-protein kinase PBL15 OS=Arabidopsis thaliana OX=3702 GN=PBL15 PE=1 SV=1
Unigene0000073	1108	147	989	sp|Q9FM85|PBL16_ARATH	408	64	357	40.3	300	154	25	210.7	2.9e-53	sp|Q9FM85|PBL16_ARATH Probable serine/threonine-protein kinase PBL16 OS=Arabidopsis thaliana OX=3702 GN=PBL16 PE=1 SV=1
Unigene0000073	1108	147	989	sp|F4JEQ2|PBL23_ARATH	386	70	358	41.7	300	145	30	210.3	3.8e-53	sp|F4JEQ2|PBL23_ARATH Probable serine/threonine-protein kinase PBL23 OS=Arabidopsis thaliana OX=3702 GN=PBL23 PE=2 SV=1
Unigene0000073	1108	147	995	sp|Q9CAH1|Y1725_ARATH	450	72	364	40.9	298	156	20	207.6	2.4e-52	sp|Q9CAH1|Y1725_ARATH Putative receptor-like protein kinase At1g72540 OS=Arabidopsis thaliana OX=3702 GN=At1g72540 PE=2 SV=1
Unigene0000079	2197	1316	948	sp|Q5FVD6|SPG21_XENLA	310	102	225	45.2	126	64	5	108.6	3.1e-22	sp|Q5FVD6|SPG21_XENLA Maspardin OS=Xenopus laevis OX=8355 GN=spg21 PE=2 SV=1
Unigene0000079	2197	544	395	sp|Q5FVD6|SPG21_XENLA	310	226	275	52	50	24	0	61.6	4.3e-08	sp|Q5FVD6|SPG21_XENLA Maspardin OS=Xenopus laevis OX=8355 GN=spg21 PE=2 SV=1
Unigene0000079	2197	1316	948	sp|Q8MJJ1|SPG21_BOVIN	308	102	225	45.2	126	64	5	106.7	1.2e-21	sp|Q8MJJ1|SPG21_BOVIN Maspardin OS=Bos taurus OX=9913 GN=SPG21 PE=2 SV=1
Unigene0000079	2197	544	401	sp|Q8MJJ1|SPG21_BOVIN	308	226	273	54.2	48	22	0	61.2	5.6e-08	sp|Q8MJJ1|SPG21_BOVIN Maspardin OS=Bos taurus OX=9913 GN=SPG21 PE=2 SV=1
Unigene0000079	2197	1316	948	sp|Q9NZD8|SPG21_HUMAN	308	102	225	44.4	126	65	5	105.1	3.4e-21	sp|Q9NZD8|SPG21_HUMAN Maspardin OS=Homo sapiens OX=9606 GN=SPG21 PE=1 SV=1
Unigene0000079	2197	544	401	sp|Q9NZD8|SPG21_HUMAN	308	226	273	54.2	48	22	0	61.2	5.6e-08	sp|Q9NZD8|SPG21_HUMAN Maspardin OS=Homo sapiens OX=9606 GN=SPG21 PE=1 SV=1
Unigene0000079	2197	1316	948	sp|Q4R5H6|SPG21_MACFA	308	102	225	44.4	126	65	5	105.1	3.4e-21	sp|Q4R5H6|SPG21_MACFA Maspardin OS=Macaca fascicularis OX=9541 GN=SPG21 PE=2 SV=1
Unigene0000079	2197	544	401	sp|Q4R5H6|SPG21_MACFA	308	226	273	54.2	48	22	0	61.2	5.6e-08	sp|Q4R5H6|SPG21_MACFA Maspardin OS=Macaca fascicularis OX=9541 GN=SPG21 PE=2 SV=1
Unigene0000079	2197	1316	948	sp|Q5RES2|SPG21_PONAB	308	102	225	44.4	126	65	5	105.1	3.4e-21	sp|Q5RES2|SPG21_PONAB Maspardin OS=Pongo abelii OX=9601 GN=SPG21 PE=2 SV=1
Unigene0000079	2197	535	401	sp|Q5RES2|SPG21_PONAB	308	229	273	55.6	45	20	0	59.7	1.6e-07	sp|Q5RES2|SPG21_PONAB Maspardin OS=Pongo abelii OX=9601 GN=SPG21 PE=2 SV=1
Unigene0000079	2197	1316	948	sp|Q9CQC8|SPG21_MOUSE	308	102	225	44.4	126	65	5	104.8	4.4e-21	sp|Q9CQC8|SPG21_MOUSE Maspardin OS=Mus musculus OX=10090 GN=Spg21 PE=1 SV=1
Unigene0000079	2197	544	401	sp|Q9CQC8|SPG21_MOUSE	308	226	273	54.2	48	22	0	61.2	5.6e-08	sp|Q9CQC8|SPG21_MOUSE Maspardin OS=Mus musculus OX=10090 GN=Spg21 PE=1 SV=1
Unigene0000079	2197	1316	948	sp|Q6PC62|SPG21_DANRE	311	102	225	45.2	126	64	5	104.4	5.8e-21	sp|Q6PC62|SPG21_DANRE Maspardin OS=Danio rerio OX=7955 GN=spg21 PE=2 SV=1
Unigene0000079	2197	544	395	sp|Q6PC62|SPG21_DANRE	311	226	275	56	50	22	0	66.6	1.3e-09	sp|Q6PC62|SPG21_DANRE Maspardin OS=Danio rerio OX=7955 GN=spg21 PE=2 SV=1
Unigene0000079	2197	1316	936	sp|Q5XIC4|SPG21_RAT	261	102	229	43.1	130	69	5	104	7.5e-21	sp|Q5XIC4|SPG21_RAT Maspardin OS=Rattus norvegicus OX=10116 GN=Spg21 PE=2 SV=1
Unigene0000088	619	13	429	sp|P0CT64|RS16A_SCHPO	140	2	140	73.4	139	37	0	208.4	8.0e-53	sp|P0CT64|RS16A_SCHPO Small ribosomal subunit protein uS9A OS=Schizosaccharomyces pombe (strain 972 / ATCC 24843) OX=284812 GN=rps1601 PE=2 SV=1
Unigene0000088	619	13	429	sp|P0CT65|RS16B_SCHPO	140	2	140	73.4	139	37	0	208.4	8.0e-53	sp|P0CT65|RS16B_SCHPO Small ribosomal subunit protein uS9B OS=Schizosaccharomyces pombe (strain 972 / ATCC 24843) OX=284812 GN=rps1602 PE=3 SV=1
Unigene0000088	619	4	429	sp|A0A1D8PCW6|RS16A_CANAL	142	1	142	72.5	142	39	0	206.8	2.3e-52	sp|A0A1D8PCW6|RS16A_CANAL Small ribosomal subunit protein uS9 OS=Candida albicans (strain SC5314 / ATCC MYA-2876) OX=237561 GN=RPS16A PE=1 SV=1
Unigene0000088	619	4	429	sp|O94017|RS16_CANAX	142	1	142	72.5	142	39	0	206.8	2.3e-52	sp|O94017|RS16_CANAX Small ribosomal subunit protein uS9 OS=Candida albicans OX=5476 GN=RPS16 PE=1 SV=1
Unigene0000088	619	16	429	sp|P0CX51|RS16A_YEAST	143	6	143	76.8	138	32	0	205.7	5.2e-52	sp|P0CX51|RS16A_YEAST Small ribosomal subunit protein uS9A OS=Saccharomyces cerevisiae (strain ATCC 204508 / S288c) OX=559292 GN=RPS16A PE=1 SV=1
Unigene0000088	619	16	429	sp|P0CX52|RS16B_YEAST	143	6	143	76.8	138	32	0	205.7	5.2e-52	sp|P0CX52|RS16B_YEAST Small ribosomal subunit protein uS9B OS=Saccharomyces cerevisiae (strain ATCC 204508 / S288c) OX=559292 GN=RPS16B PE=1 SV=1
Unigene0000088	619	4	429	sp|Q6BSI7|RS16_DEBHA	142	1	142	72.5	142	39	0	204.5	1.2e-51	sp|Q6BSI7|RS16_DEBHA Small ribosomal subunit protein uS9 OS=Debaryomyces hansenii (strain ATCC 36239 / CBS 767 / BCRC 21394 / JCM 1990 / NBRC 0083 / IGC 2968) OX=284592 GN=RPS16 PE=3 SV=1
Unigene0000088	619	16	429	sp|Q6FR56|RS16_CANGA	143	6	143	74.6	138	35	0	201.8	7.5e-51	sp|Q6FR56|RS16_CANGA Small ribosomal subunit protein uS9 OS=Candida glabrata (strain ATCC 2001 / BCRC 20586 / JCM 3761 / NBRC 0622 / NRRL Y-65 / CBS 138) OX=284593 GN=RPS16 PE=3 SV=1
Unigene0000088	619	16	429	sp|Q759L8|RS16_EREGS	143	6	143	73.2	138	37	0	199.5	3.7e-50	sp|Q759L8|RS16_EREGS Small ribosomal subunit protein uS9 OS=Eremothecium gossypii (strain ATCC 10895 / CBS 109.51 / FGSC 9923 / NRRL Y-1056) OX=284811 GN=RPS16 PE=3 SV=1
Unigene0000088	619	16	429	sp|Q875N2|RS16_KLULA	143	6	143	73.2	138	37	0	199.5	3.7e-50	sp|Q875N2|RS16_KLULA Small ribosomal subunit protein uS9 OS=Kluyveromyces lactis (strain ATCC 8585 / CBS 2359 / DSM 70799 / NBRC 1267 / NRRL Y-1140 / WM37) OX=284590 GN=RPS16 PE=1 SV=1
Unigene0000088	619	16	429	sp|Q876B4|RS16_KAZEX	143	6	143	73.2	138	37	0	197.6	1.4e-49	sp|Q876B4|RS16_KAZEX Small ribosomal subunit protein uS9 OS=Kazachstania exigua OX=34358 GN=RPS16 PE=3 SV=3
Unigene0000088	619	13	429	sp|Q42340|RS163_ARATH	146	8	146	66.9	139	46	0	195.7	5.3e-49	sp|Q42340|RS163_ARATH Small ribosomal subunit protein uS9x OS=Arabidopsis thaliana OX=3702 GN=RPS16C PE=2 SV=1
Unigene0000088	619	13	429	sp|Q9SK22|RS161_ARATH	146	8	146	66.2	139	47	0	195.3	7.0e-49	sp|Q9SK22|RS161_ARATH Small ribosomal subunit protein uS9z OS=Arabidopsis thaliana OX=3702 GN=RPS16A PE=2 SV=1
Unigene0000088	619	4	429	sp|Q7SFJ9|RS16_NEUCR	142	1	142	69	142	44	0	194.9	9.1e-49	sp|Q7SFJ9|RS16_NEUCR Small ribosomal subunit protein uS9 OS=Neurospora crassa (strain ATCC 24698 / 74-OR23-1A / CBS 708.71 / DSM 1257 / FGSC 987) OX=367110 GN=rps-16 PE=1 SV=1
Unigene0000088	619	13	429	sp|P46293|RS16_GOSHI	145	7	145	65.5	139	48	0	194.1	1.6e-48	sp|P46293|RS16_GOSHI Small ribosomal subunit protein uS9 OS=Gossypium hirsutum OX=3635 GN=RPS16 PE=2 SV=1
Unigene0000088	619	13	429	sp|Q22054|RS16_CAEEL	144	6	144	66.2	139	47	0	191.8	7.7e-48	sp|Q22054|RS16_CAEEL Small ribosomal subunit protein uS9 OS=Caenorhabditis elegans OX=6239 GN=rps-16 PE=1 SV=3
Unigene0000088	619	13	429	sp|Q3T0X6|RS16_BOVIN	146	8	146	65.5	139	48	0	191	1.3e-47	sp|Q3T0X6|RS16_BOVIN Small ribosomal subunit protein uS9 OS=Bos taurus OX=9913 GN=RPS16 PE=1 SV=3
Unigene0000088	619	13	429	sp|Q98TR7|RS16_HETFO	146	8	146	66.9	139	46	0	191	1.3e-47	sp|Q98TR7|RS16_HETFO Small ribosomal subunit protein uS9 OS=Heteropneustes fossilis OX=93621 GN=rps16 PE=2 SV=1
Unigene0000088	619	13	429	sp|P62249|RS16_HUMAN	146	8	146	65.5	139	48	0	191	1.3e-47	sp|P62249|RS16_HUMAN Small ribosomal subunit protein uS9 OS=Homo sapiens OX=9606 GN=RPS16 PE=1 SV=2
Unigene0000088	619	13	429	sp|P14131|RS16_MOUSE	146	8	146	65.5	139	48	0	191	1.3e-47	sp|P14131|RS16_MOUSE Small ribosomal subunit protein uS9 OS=Mus musculus OX=10090 GN=Rps16 PE=1 SV=4
Unigene0000091	332	262	2	sp|O22478|IMA_SOLLC	527	5	92	48.9	88	44	1	74.7	7.3e-13	sp|O22478|IMA_SOLLC Importin subunit alpha OS=Solanum lycopersicum OX=4081 PE=2 SV=2
Unigene0000091	332	268	2	sp|Q9FWY7|IMPA6_ARATH	538	3	95	40.9	93	51	4	57	1.6e-07	sp|Q9FWY7|IMPA6_ARATH Importin subunit alpha-6 OS=Arabidopsis thaliana OX=3702 GN=IMPA6 PE=1 SV=1
Unigene0000091	332	262	2	sp|O04294|IMPA3_ARATH	531	5	94	41.3	92	47	7	53.1	2.3e-06	sp|O04294|IMPA3_ARATH Importin subunit alpha-3 OS=Arabidopsis thaliana OX=3702 GN=IMPA3 PE=1 SV=2
Unigene0000098	369	368	180	sp|Q8LG95|PP332_ARATH	307	184	246	69.8	63	19	0	95.1	5.9e-19	sp|Q8LG95|PP332_ARATH Pentatricopeptide repeat-containing protein At4g21190 OS=Arabidopsis thaliana OX=3702 GN=EMB1417 PE=2 SV=1
Unigene0000113	645	18	407	sp|O94238|RL14_SCHPO	134	2	130	53.1	130	60	1	124.8	1.2e-27	sp|O94238|RL14_SCHPO Large ribosomal subunit protein eL14 OS=Schizosaccharomyces pombe (strain 972 / ATCC 24843) OX=284812 GN=rpl14 PE=1 SV=1
Unigene0000113	645	30	407	sp|P38754|RL14B_YEAST	138	13	137	46.8	126	66	1	104.4	1.7e-21	sp|P38754|RL14B_YEAST Large ribosomal subunit protein eL14B OS=Saccharomyces cerevisiae (strain ATCC 204508 / S288c) OX=559292 GN=RPL14B PE=1 SV=1
Unigene0000113	645	24	386	sp|Q9CR57|RL14_MOUSE	217	3	122	43.8	121	67	1	100.9	1.9e-20	sp|Q9CR57|RL14_MOUSE Large ribosomal subunit protein eL14 OS=Mus musculus OX=10090 GN=Rpl14 PE=1 SV=3
Unigene0000113	645	30	407	sp|P36105|RL14A_YEAST	138	13	137	46	126	67	1	99.8	4.2e-20	sp|P36105|RL14A_YEAST Large ribosomal subunit protein eL14A OS=Saccharomyces cerevisiae (strain ATCC 204508 / S288c) OX=559292 GN=RPL14A PE=1 SV=1
Unigene0000113	645	24	386	sp|Q3T0U2|RL14_BOVIN	214	3	122	41.3	121	70	1	97.8	1.6e-19	sp|Q3T0U2|RL14_BOVIN Large ribosomal subunit protein eL14 OS=Bos taurus OX=9913 GN=RPL14 PE=2 SV=3
Unigene0000113	645	24	377	sp|Q63507|RL14_RAT	214	3	119	43.2	118	66	1	97.8	1.6e-19	sp|Q63507|RL14_RAT Large ribosomal subunit protein eL14 OS=Rattus norvegicus OX=10116 GN=Rpl14 PE=1 SV=3
Unigene0000113	645	9	416	sp|A0A1D8PFL9|RL14_CANAL	131	4	129	46.3	136	63	10	96.7	3.5e-19	sp|A0A1D8PFL9|RL14_CANAL Large ribosomal subunit protein eL14 OS=Candida albicans (strain SC5314 / ATCC MYA-2876) OX=237561 GN=RPL14 PE=1 SV=1
Unigene0000113	645	24	377	sp|A1XQU3|RL14_PIG	213	3	119	41.5	118	68	1	95.9	6.0e-19	sp|A1XQU3|RL14_PIG Large ribosomal subunit protein eL14 OS=Sus scrofa OX=9823 GN=RPL14 PE=1 SV=1
Unigene0000113	645	24	359	sp|G1SZ12|RL14_RABIT	218	3	113	42	112	64	1	93.2	3.9e-18	sp|G1SZ12|RL14_RABIT Large ribosomal subunit protein eL14 OS=Oryctolagus cuniculus OX=9986 GN=RPL14 PE=1 SV=1
Unigene0000113	645	24	359	sp|P50914|RL14_HUMAN	215	3	113	42	112	64	1	92	8.7e-18	sp|P50914|RL14_HUMAN Large ribosomal subunit protein eL14 OS=Homo sapiens OX=9606 GN=RPL14 PE=1 SV=4
Unigene0000113	645	24	398	sp|P55841|RL14_DROME	166	3	126	35.2	125	80	1	89.4	5.6e-17	sp|P55841|RL14_DROME Large ribosomal subunit protein eL14 OS=Drosophila melanogaster OX=7227 GN=RpL14 PE=1 SV=1
Unigene0000113	645	24	398	sp|Q95ZE8|RL14_DROVI	160	3	126	35.2	125	80	1	87.4	2.1e-16	sp|Q95ZE8|RL14_DROVI Large ribosomal subunit protein eL14 OS=Drosophila virilis OX=7244 GN=RpL14 PE=3 SV=1
Unigene0000113	645	24	377	sp|P55844|RL14_PEA	133	3	117	39.8	118	68	3	86.3	4.8e-16	sp|P55844|RL14_PEA Large ribosomal subunit protein eL14 OS=Pisum sativum OX=3888 PE=2 SV=1
Unigene0000113	645	24	383	sp|Q24C27|RL14_TETTS	126	3	120	42.1	121	66	4	84.3	1.8e-15	sp|Q24C27|RL14_TETTS Large ribosomal subunit protein eL14 OS=Tetrahymena thermophila (strain SB210) OX=312017 GN=RPL14 PE=1 SV=2
Unigene0000113	645	21	410	sp|O46160|RL14_LUMRU	152	2	130	34.6	130	84	1	82.4	6.9e-15	sp|O46160|RL14_LUMRU Large ribosomal subunit protein eL14 OS=Lumbricus rubellus OX=35632 GN=RPL14 PE=3 SV=1
Unigene0000113	645	24	413	sp|Q9T043|RL142_ARATH	134	3	133	36.6	134	78	7	82	9.0e-15	sp|Q9T043|RL142_ARATH Large ribosomal subunit protein eL14y OS=Arabidopsis thaliana OX=3702 GN=RPL14B PE=1 SV=1
Unigene0000113	645	24	410	sp|Q54Z09|RL14_DICDI	157	5	132	37.2	129	80	1	80.9	2.0e-14	sp|Q54Z09|RL14_DICDI Large ribosomal subunit protein eL14 OS=Dictyostelium discoideum OX=44689 GN=rpl14 PE=3 SV=1
Unigene0000113	645	24	377	sp|Q9SIM4|RL141_ARATH	134	3	117	38.1	118	70	3	79.3	5.8e-14	sp|Q9SIM4|RL141_ARATH Large ribosomal subunit protein eL14z OS=Arabidopsis thaliana OX=3702 GN=RPL14A PE=2 SV=1
Unigene0000115	998	41	793	sp|Q05016|YM71_YEAST	267	11	260	34.3	254	160	7	134	3.1e-30	sp|Q05016|YM71_YEAST NADP-dependent 3-hydroxy acid dehydrogenase OS=Saccharomyces cerevisiae (strain ATCC 204508 / S288c) OX=559292 GN=YMR226C PE=1 SV=1
Unigene0000115	998	41	787	sp|Q9P7B4|YI13_SCHPO	259	4	248	36	250	154	6	132.1	1.2e-29	sp|Q9P7B4|YI13_SCHPO NADP-dependent 3-hydroxy acid dehydrogenase OS=Schizosaccharomyces pombe (strain 972 / ATCC 24843) OX=284812 GN=SPAC521.03 PE=1 SV=1
Unigene0000115	998	53	787	sp|Q9KWN1|SDH_RHIRD	249	4	238	35.4	246	147	12	125.2	1.4e-27	sp|Q9KWN1|SDH_RHIRD Serine 3-dehydrogenase OS=Rhizobium radiobacter OX=358 GN=sdh PE=1 SV=1
Unigene0000115	998	53	787	sp|Q8U8I2|SDH_AGRFC	249	4	238	34.6	246	149	12	124.8	1.9e-27	sp|Q8U8I2|SDH_AGRFC Serine 3-dehydrogenase OS=Agrobacterium fabrum (strain C58 / ATCC 33970) OX=176299 GN=sdh PE=3 SV=1
Unigene0000115	998	41	778	sp|Q8CN40|Y2036_STAES	230	4	229	33.9	248	140	24	123.6	4.2e-27	sp|Q8CN40|Y2036_STAES Uncharacterized oxidoreductase SE_2036 OS=Staphylococcus epidermidis (strain ATCC 12228 / FDA PCI 1200) OX=176280 GN=SE_2036 PE=3 SV=1
Unigene0000115	998	41	778	sp|Q5HLD8|Y2049_STAEQ	230	4	229	33.9	248	140	24	123.6	4.2e-27	sp|Q5HLD8|Y2049_STAEQ Uncharacterized oxidoreductase SERP2049 OS=Staphylococcus epidermidis (strain ATCC 35984 / RP62A) OX=176279 GN=SERP2049 PE=3 SV=1
Unigene0000115	998	59	787	sp|Q8FHD2|YDFG_ECOL6	248	4	238	32.8	244	154	10	120.2	4.6e-26	sp|Q8FHD2|YDFG_ECOL6 NADP-dependent 3-hydroxy acid dehydrogenase YdfG OS=Escherichia coli O6:H1 (strain CFT073 / ATCC 700928 / UPEC) OX=199310 GN=ydfG PE=3 SV=2
Unigene0000115	998	59	787	sp|Q8X505|YDFG_ECO57	248	4	238	32.8	244	154	10	119	1.0e-25	sp|Q8X505|YDFG_ECO57 NADP-dependent 3-hydroxy acid dehydrogenase YdfG OS=Escherichia coli O157:H7 OX=83334 GN=ydfG PE=3 SV=1
Unigene0000115	998	59	787	sp|P69935|YDFG_SALTI	248	4	238	32.8	244	154	10	119	1.0e-25	sp|P69935|YDFG_SALTI NADP-dependent 3-hydroxy acid dehydrogenase YdfG OS=Salmonella typhi OX=90370 GN=ydfG PE=3 SV=1
Unigene0000115	998	59	787	sp|P69936|YDFG_SALTY	248	4	238	32.8	244	154	10	119	1.0e-25	sp|P69936|YDFG_SALTY NADP-dependent 3-hydroxy acid dehydrogenase YdfG OS=Salmonella typhimurium (strain LT2 / SGSC1412 / ATCC 700720) OX=99287 GN=ydfG PE=3 SV=1
Unigene0000115	998	59	787	sp|P39831|YDFG_ECOLI	248	4	238	32.8	244	154	10	118.6	1.3e-25	sp|P39831|YDFG_ECOLI NADP-dependent 3-hydroxy acid dehydrogenase YdfG OS=Escherichia coli (strain K12) OX=83333 GN=ydfG PE=1 SV=2
Unigene0000115	998	59	787	sp|Q83RE8|YDFG_SHIFL	248	4	238	32.4	244	155	10	118.2	1.7e-25	sp|Q83RE8|YDFG_SHIFL NADP-dependent 3-hydroxy acid dehydrogenase YdfG OS=Shigella flexneri OX=623 GN=ydfG PE=3 SV=2
Unigene0000115	998	38	766	sp|A0A1U8QWA2|ATR12_EMENI	1270	1026	1261	34.3	248	146	17	116.7	5.1e-25	sp|A0A1U8QWA2|ATR12_EMENI Glycine betaine reductase ATRR OS=Emericella nidulans (strain FGSC A4 / ATCC 38163 / CBS 112.46 / NRRL 194 / M139) OX=227321 GN=ATRR PE=1 SV=1
Unigene0000115	998	41	763	sp|Q7Q732|DHRS7_ANOGA	317	46	285	30.4	247	159	13	104	3.4e-21	sp|Q7Q732|DHRS7_ANOGA Dehydrogenase/reductase SDR family protein 7-like OS=Anopheles gambiae OX=7165 GN=AGAP005532 PE=3 SV=3
Unigene0000115	998	41	739	sp|P51831|FABG_BACSU	246	2	228	32.9	237	145	14	102.1	1.3e-20	sp|P51831|FABG_BACSU 3-oxoacyl-[acyl-carrier-protein] reductase FabG OS=Bacillus subtilis (strain 168) OX=224308 GN=fabG PE=3 SV=3
Unigene0000115	998	41	622	sp|P0A2D2|UCPA_SALTI	263	4	190	40.5	195	107	9	98.2	1.9e-19	sp|P0A2D2|UCPA_SALTI Oxidoreductase UcpA OS=Salmonella typhi OX=90370 GN=ucpA PE=3 SV=1
Unigene0000115	998	41	622	sp|P0A2D1|UCPA_SALTY	263	4	190	40.5	195	107	9	98.2	1.9e-19	sp|P0A2D1|UCPA_SALTY Oxidoreductase UcpA OS=Salmonella typhimurium (strain LT2 / SGSC1412 / ATCC 700720) OX=99287 GN=ucpA PE=3 SV=1
Unigene0000115	998	29	748	sp|P39483|DHG2_PRIMG	261	1	237	31.1	244	157	11	94.7	2.1e-18	sp|P39483|DHG2_PRIMG Glucose 1-dehydrogenase 2 OS=Priestia megaterium OX=1404 GN=gdhII PE=3 SV=1
Unigene0000115	998	50	793	sp|Q71R50|DHR11_CHICK	255	7	255	30.3	251	170	5	92.4	1.0e-17	sp|Q71R50|DHR11_CHICK Dehydrogenase/reductase SDR family member 11 OS=Gallus gallus OX=9031 GN=DHRS11 PE=2 SV=1
Unigene0000115	998	41	640	sp|P07999|DHGB_PRIMG	262	5	201	31.3	201	133	5	91.7	1.8e-17	sp|P07999|DHGB_PRIMG Glucose 1-dehydrogenase B OS=Priestia megaterium OX=1404 GN=gdhB PE=1 SV=2
Unigene0000120	1231	574	1080	sp|P23472|CHLY_HEVBR	311	131	299	66.9	169	56	0	258.1	1.7e-67	sp|P23472|CHLY_HEVBR Hevamine-A OS=Hevea brasiliensis OX=3981 PE=1 SV=2
Unigene0000120	1231	11	382	sp|P23472|CHLY_HEVBR	311	11	132	60.5	124	47	2	162.5	1.0e-38	sp|P23472|CHLY_HEVBR Hevamine-A OS=Hevea brasiliensis OX=3981 PE=1 SV=2
Unigene0000120	1231	574	1080	sp|P19172|CHIA_ARATH	302	134	302	60.9	169	66	0	242.7	7.6e-63	sp|P19172|CHIA_ARATH Acidic endochitinase OS=Arabidopsis thaliana OX=3702 GN=CHIB1 PE=2 SV=2
Unigene0000120	1231	65	382	sp|P19172|CHIA_ARATH	302	30	135	63.2	106	39	0	156	9.3e-37	sp|P19172|CHIA_ARATH Acidic endochitinase OS=Arabidopsis thaliana OX=3702 GN=CHIB1 PE=2 SV=2
Unigene0000120	1231	574	1080	sp|P51614|CHIT3_VITVI	301	130	301	62.2	172	62	3	237.7	2.4e-61	sp|P51614|CHIT3_VITVI Acidic endochitinase OS=Vitis vinifera OX=29760 GN=CHIT3 PE=2 SV=1
Unigene0000120	1231	17	382	sp|P51614|CHIT3_VITVI	301	10	131	60.7	122	48	0	167.9	2.4e-40	sp|P51614|CHIT3_VITVI Acidic endochitinase OS=Vitis vinifera OX=29760 GN=CHIT3 PE=2 SV=1
Unigene0000120	1231	574	1080	sp|P29060|CHIA_TOBAC	291	127	291	64.5	169	56	4	236.5	5.4e-61	sp|P29060|CHIA_TOBAC Acidic endochitinase OS=Nicotiana tabacum OX=4097 PE=1 SV=1
Unigene0000120	1231	2	382	sp|P29060|CHIA_TOBAC	291	3	128	62.5	128	45	3	166	9.0e-40	sp|P29060|CHIA_TOBAC Acidic endochitinase OS=Nicotiana tabacum OX=4097 PE=1 SV=1
Unigene0000120	1231	574	1080	sp|P36910|CHIE_BETVU	293	129	293	63.9	169	57	4	226.5	5.6e-58	sp|P36910|CHIE_BETVU Acidic endochitinase SE2 OS=Beta vulgaris OX=161934 GN=SE2 PE=1 SV=1
Unigene0000120	1231	5	382	sp|P36910|CHIE_BETVU	293	6	130	54.8	126	56	1	153.3	6.1e-36	sp|P36910|CHIE_BETVU Acidic endochitinase SE2 OS=Beta vulgaris OX=161934 GN=SE2 PE=1 SV=1
Unigene0000120	1231	574	1080	sp|P36908|CHIA_CICAR	293	128	293	62.9	170	58	5	225.7	9.6e-58	sp|P36908|CHIA_CICAR Acidic endochitinase OS=Cicer arietinum OX=3827 PE=2 SV=1
Unigene0000120	1231	14	382	sp|P36908|CHIA_CICAR	293	7	129	59.3	123	50	0	157.1	4.2e-37	sp|P36908|CHIA_CICAR Acidic endochitinase OS=Cicer arietinum OX=3827 PE=2 SV=1
Unigene0000120	1231	574	1080	sp|P29024|CHIA_PHAAN	298	134	298	60.9	169	62	4	223	6.2e-57	sp|P29024|CHIA_PHAAN Acidic endochitinase OS=Phaseolus angularis OX=3914 PE=2 SV=1
Unigene0000120	1231	17	382	sp|P29024|CHIA_PHAAN	298	14	135	61.5	122	47	0	156.4	7.2e-37	sp|P29024|CHIA_PHAAN Acidic endochitinase OS=Phaseolus angularis OX=3914 PE=2 SV=1
Unigene0000120	1231	574	1080	sp|G1UH28|CHIT_PUNGR	299	131	299	59.6	171	65	4	217.2	3.4e-55	sp|G1UH28|CHIT_PUNGR Acidic endochitinase Pun g 14, amyloplastic OS=Punica granatum OX=22663 GN=PSC PE=1 SV=1
Unigene0000120	1231	8	382	sp|G1UH28|CHIT_PUNGR	299	10	132	63.2	125	44	2	167.9	2.4e-40	sp|G1UH28|CHIT_PUNGR Acidic endochitinase Pun g 14, amyloplastic OS=Punica granatum OX=22663 GN=PSC PE=1 SV=1
Unigene0000120	1231	574	1080	sp|P29061|CHIB_TOBAC	294	129	294	58.6	169	67	3	212.2	1.1e-53	sp|P29061|CHIB_TOBAC Basic endochitinase OS=Nicotiana tabacum OX=4097 PE=2 SV=1
Unigene0000120	1231	2	382	sp|P29061|CHIB_TOBAC	294	4	130	53.5	127	59	0	141	3.1e-32	sp|P29061|CHIB_TOBAC Basic endochitinase OS=Nicotiana tabacum OX=4097 PE=2 SV=1
Unigene0000120	1231	574	1080	sp|P17541|CHIA_CUCSA	292	130	291	52.4	170	72	9	185.7	1.1e-45	sp|P17541|CHIA_CUCSA Acidic endochitinase OS=Cucumis sativus OX=3659 PE=1 SV=1
Unigene0000120	1231	2	382	sp|P17541|CHIA_CUCSA	292	5	131	57.5	127	54	0	161	2.9e-38	sp|P17541|CHIA_CUCSA Acidic endochitinase OS=Cucumis sativus OX=3659 PE=1 SV=1
Unigene0000120	1231	595	1071	sp|Q7GCM7|XIP1_ORYSJ	304	140	301	40.7	162	93	3	136	1.0e-30	sp|Q7GCM7|XIP1_ORYSJ Xylanase inhibitor protein 1 OS=Oryza sativa subsp. japonica OX=39947 GN=RIXI PE=1 SV=1
Unigene0000120	1231	5	370	sp|Q7GCM7|XIP1_ORYSJ	304	13	128	38.2	123	68	8	81.6	2.2e-14	sp|Q7GCM7|XIP1_ORYSJ Xylanase inhibitor protein 1 OS=Oryza sativa subsp. japonica OX=39947 GN=RIXI PE=1 SV=1
Unigene0000120	1231	601	1068	sp|Q2VST0|CHIT_ZIZMA	330	141	307	39.5	167	90	11	129.4	9.4e-29	sp|Q2VST0|CHIT_ZIZMA Endochitinase Ziz m 1.0101 OS=Ziziphus mauritiana OX=157914 PE=1 SV=1
Unigene0000120	1231	11	382	sp|Q2VST0|CHIT_ZIZMA	330	7	129	45.7	127	62	7	107.8	2.9e-22	sp|Q2VST0|CHIT_ZIZMA Endochitinase Ziz m 1.0101 OS=Ziziphus mauritiana OX=157914 PE=1 SV=1
Unigene0000120	1231	598	1068	sp|P49347|CONB_CANEN	324	142	304	42.3	163	88	6	122.9	8.8e-27	sp|P49347|CONB_CANEN Concanavalin B OS=Canavalia ensiformis OX=3823 PE=1 SV=1
Unigene0000120	1231	577	1074	sp|P29029|CHIT_YEAST	562	137	297	40	170	89	13	119.4	9.7e-26	sp|P29029|CHIT_YEAST Endochitinase OS=Saccharomyces cerevisiae (strain ATCC 204508 / S288c) OX=559292 GN=CTS1 PE=1 SV=2
Unigene0000120	1231	5	376	sp|P29029|CHIT_YEAST	562	1	133	41.2	136	65	15	75.9	1.2e-12	sp|P29029|CHIT_YEAST Endochitinase OS=Saccharomyces cerevisiae (strain ATCC 204508 / S288c) OX=559292 GN=CTS1 PE=1 SV=2
Unigene0000120	1231	580	1065	sp|P29027|CHI2_RHIOL	542	146	305	40.1	162	95	2	116.3	8.2e-25	sp|P29027|CHI2_RHIOL Chitinase 2 OS=Rhizopus oligosporus OX=4847 GN=CHI2 PE=1 SV=1
Unigene0000120	1231	580	1053	sp|P29026|CHI1_RHIOL	540	146	301	40.5	158	92	2	115.9	1.1e-24	sp|P29026|CHI1_RHIOL Chitinase 1 OS=Rhizopus oligosporus OX=4847 GN=CHI1 PE=1 SV=1
Unigene0000120	1231	580	1062	sp|Q5AAH2|CHI1_CANAL	462	127	282	37.8	164	91	11	109	1.3e-22	sp|Q5AAH2|CHI1_CANAL Chitinase 1 OS=Candida albicans (strain SC5314 / ATCC MYA-2876) OX=237561 GN=CHT1 PE=1 SV=1
Unigene0000120	1231	580	1062	sp|P46876|CHI1_CANAX	462	127	282	37.8	164	91	11	109	1.3e-22	sp|P46876|CHI1_CANAX Chitinase 1 OS=Candida albicans OX=5476 GN=CHT1 PE=3 SV=2
Unigene0000120	1231	562	1059	sp|Q53NL5|XIP2_ORYSJ	290	125	287	36.5	170	97	11	108.2	2.2e-22	sp|Q53NL5|XIP2_ORYSJ Xylanase inhibitor protein 2 OS=Oryza sativa subsp. japonica OX=39947 GN=Chib3H-h PE=1 SV=1
Unigene0000120	1231	50	382	sp|Q53NL5|XIP2_ORYSJ	290	25	128	42.3	111	57	7	90.9	3.7e-17	sp|Q53NL5|XIP2_ORYSJ Xylanase inhibitor protein 2 OS=Oryza sativa subsp. japonica OX=39947 GN=Chib3H-h PE=1 SV=1
Unigene0000120	1231	562	1059	sp|Q5WMW5|XIP_ORYSJ	293	128	290	32.5	169	105	9	107.8	2.9e-22	sp|Q5WMW5|XIP_ORYSJ Xylanase inhibitor protein XIP OS=Oryza sativa subsp. japonica OX=39947 GN=XIP PE=2 SV=1
Unigene0000121	1599	1575	172	sp|B6H5L5|MAP21_PENRW	465	1	465	77.8	468	101	3	701.4	7.8e-201	sp|B6H5L5|MAP21_PENRW Methionine aminopeptidase 2-1 OS=Penicillium rubens (strain ATCC 28089 / DSM 1075 / NRRL 1951 / Wisconsin 54-1255) OX=500485 GN=Pc14g00010 PE=3 SV=1
Unigene0000121	1599	1575	172	sp|B8NLL0|MAP22_ASPFN	468	1	468	72.9	468	127	0	637.1	1.8e-181	sp|B8NLL0|MAP22_ASPFN Methionine aminopeptidase 2-2 OS=Aspergillus flavus (strain ATCC 200026 / FGSC A1120 / IAM 13836 / NRRL 3357 / JCM 12722 / SRRC 167) OX=332952 GN=AFLA_092260 PE=3 SV=1
Unigene0000121	1599	1575	172	sp|Q2U6H2|MAP2_ASPOR	468	1	468	72.9	468	127	0	637.1	1.8e-181	sp|Q2U6H2|MAP2_ASPOR Methionine aminopeptidase 2 OS=Aspergillus oryzae (strain ATCC 42149 / RIB 40) OX=510516 GN=AO090120000238 PE=3 SV=1
Unigene0000121	1599	1575	172	sp|Q5BGG1|MAP22_EMENI	458	1	458	68.4	468	138	10	599.4	4.2e-170	sp|Q5BGG1|MAP22_EMENI Methionine aminopeptidase 2-2 OS=Emericella nidulans (strain FGSC A4 / ATCC 38163 / CBS 112.46 / NRRL 194 / M139) OX=227321 GN=AN0369 PE=3 SV=2
Unigene0000121	1599	1575	172	sp|E3QDQ4|MAP21_COLGM	463	1	463	63.3	471	162	11	542.7	4.6e-153	sp|E3QDQ4|MAP21_COLGM Methionine aminopeptidase 2-1 OS=Colletotrichum graminicola (strain M1.001 / M2 / FGSC 10212) OX=645133 GN=GLRG_04136 PE=3 SV=1
Unigene0000121	1599	1500	172	sp|Q2GSJ7|MAP21_CHAGB	439	2	439	66.4	443	144	5	542.3	6.0e-153	sp|Q2GSJ7|MAP21_CHAGB Methionine aminopeptidase 2-1 OS=Chaetomium globosum (strain ATCC 6205 / CBS 148.51 / DSM 1962 / NBRC 6347 / NRRL 1970) OX=306901 GN=CHGG_09057 PE=3 SV=1
Unigene0000121	1599	1575	172	sp|C7Z7V7|MAP22_FUSV7	450	1	450	69	468	127	18	538.9	6.7e-152	sp|C7Z7V7|MAP22_FUSV7 Methionine aminopeptidase 2-2 OS=Fusarium vanettenii (strain ATCC MYA-4622 / CBS 123669 / FGSC 9596 / NRRL 45880 / 77-13-4) OX=660122 GN=NECHADRAFT_93045 PE=3 SV=1
Unigene0000121	1599	1575	172	sp|B8M990|MAP22_TALSN	464	1	464	65	468	160	4	530.4	2.4e-149	sp|B8M990|MAP22_TALSN Methionine aminopeptidase 2-2 OS=Talaromyces stipitatus (strain ATCC 10500 / CBS 375.48 / QM 6759 / NRRL 1006) OX=441959 GN=TSTA_112180 PE=3 SV=1
Unigene0000121	1599	1575	172	sp|B6QD96|MAP22_TALMQ	463	1	463	62.4	468	171	5	525	1.0e-147	sp|B6QD96|MAP22_TALMQ Methionine aminopeptidase 2-2 OS=Talaromyces marneffei (strain ATCC 18224 / CBS 334.59 / QM 7333) OX=441960 GN=PMAA_077770 PE=3 SV=1
Unigene0000121	1599	1305	172	sp|A2QAF9|MAP21_ASPNC	475	87	475	61.8	395	128	23	465.3	9.4e-130	sp|A2QAF9|MAP21_ASPNC Methionine aminopeptidase 2-1 OS=Aspergillus niger (strain ATCC MYA-4892 / CBS 513.88 / FGSC A1513) OX=425011 GN=An01g11360 PE=3 SV=1
Unigene0000121	1599	1296	172	sp|A1CCP2|MAP21_ASPCL	478	111	478	62.5	376	132	9	464.2	2.1e-129	sp|A1CCP2|MAP21_ASPCL Methionine aminopeptidase 2-1 OS=Aspergillus clavatus (strain ATCC 1007 / CBS 513.65 / DSM 816 / NCTC 3887 / NRRL 1 / QM 1276 / 107) OX=344612 GN=ACLA_062640 PE=3 SV=1
Unigene0000121	1599	1296	172	sp|C5FEJ1|MAP21_ARTOC	463	90	463	61.3	375	144	1	461.8	1.0e-128	sp|C5FEJ1|MAP21_ARTOC Methionine aminopeptidase 2-1 OS=Arthroderma otae (strain ATCC MYA-4605 / CBS 113480) OX=554155 GN=MCYG_01113 PE=3 SV=1
Unigene0000121	1599	1296	172	sp|A1CXT5|MAP21_NEOFI	444	77	444	62.1	375	135	7	458.4	1.1e-127	sp|A1CXT5|MAP21_NEOFI Methionine aminopeptidase 2-1 OS=Neosartorya fischeri (strain ATCC 1020 / DSM 3700 / CBS 544.65 / FGSC A1164 / JCM 1740 / NRRL 181 / WB 181) OX=331117 GN=NFIA_109310 PE=3 SV=1
Unigene0000121	1599	1302	172	sp|A1CYM1|MAP22_NEOFI	463	94	463	62.7	378	132	9	458.4	1.1e-127	sp|A1CYM1|MAP22_NEOFI Methionine aminopeptidase 2-2 OS=Neosartorya fischeri (strain ATCC 1020 / DSM 3700 / CBS 544.65 / FGSC A1164 / JCM 1740 / NRRL 181 / WB 181) OX=331117 GN=NFIA_034070 PE=3 SV=1
Unigene0000121	1599	1296	172	sp|C0NX86|MAP22_AJECG	465	92	465	60	375	149	1	458	1.5e-127	sp|C0NX86|MAP22_AJECG Methionine aminopeptidase 2-2 OS=Ajellomyces capsulatus (strain G186AR / H82 / ATCC MYA-2454 / RMSCC 2432) OX=447093 GN=HCBG_08078 PE=3 SV=1
Unigene0000121	1599	1296	172	sp|C6HI66|MAP2_AJECH	440	67	440	60	375	149	1	458	1.5e-127	sp|C6HI66|MAP2_AJECH Methionine aminopeptidase 2 OS=Ajellomyces capsulatus (strain H143) OX=544712 GN=HCDG_06216 PE=3 SV=1
Unigene0000121	1599	1287	172	sp|B8LUH2|MAP21_TALSN	443	79	443	61.3	372	137	7	457.2	2.5e-127	sp|B8LUH2|MAP21_TALSN Methionine aminopeptidase 2-1 OS=Talaromyces stipitatus (strain ATCC 10500 / CBS 375.48 / QM 6759 / NRRL 1006) OX=441959 GN=TSTA_071420 PE=3 SV=1
Unigene0000121	1599	1296	172	sp|B0Y5N4|MAP22_ASPFC	472	105	472	61.9	375	136	7	457.2	2.5e-127	sp|B0Y5N4|MAP22_ASPFC Methionine aminopeptidase 2-2 OS=Aspergillus fumigatus (strain CBS 144.89 / FGSC A1163 / CEA10) OX=451804 GN=AFUB_064000 PE=3 SV=2
Unigene0000121	1599	1296	172	sp|Q4WNT9|MAP23_ASPFU	472	105	472	61.9	375	136	7	457.2	2.5e-127	sp|Q4WNT9|MAP23_ASPFU Methionine aminopeptidase 2-3 OS=Aspergillus fumigatus (strain ATCC MYA-4609 / CBS 101355 / FGSC A1100 / Af293) OX=330879 GN=AFUA_4G06930 PE=3 SV=2
Unigene0000121	1599	1293	172	sp|E5R278|MAP21_ARTGP	467	95	467	60.2	374	148	1	456.8	3.3e-127	sp|E5R278|MAP21_ARTGP Methionine aminopeptidase 2-1 OS=Arthroderma gypseum (strain ATCC MYA-4604 / CBS 118893) OX=535722 GN=MGYG_01664 PE=3 SV=1
Unigene0000122	643	602	87	sp|Q7SI16|ATP7_NEUCR	173	2	173	61.6	172	66	0	202.6	4.5e-51	sp|Q7SI16|ATP7_NEUCR ATP synthase subunit d, mitochondrial OS=Neurospora crassa (strain ATCC 24698 / 74-OR23-1A / CBS 708.71 / DSM 1257 / FGSC 987) OX=367110 GN=atp7 PE=3 SV=1
Unigene0000122	643	602	87	sp|P0C2C8|ATP7_ASPTN	173	2	173	60.5	172	68	0	200.7	1.7e-50	sp|P0C2C8|ATP7_ASPTN ATP synthase subunit d, mitochondrial OS=Aspergillus terreus (strain NIH 2624 / FGSC A1156) OX=341663 GN=atp7 PE=3 SV=1
Unigene0000122	643	611	87	sp|Q6CFH9|ATP7_YARLI	176	2	176	46.9	175	93	0	169.1	5.6e-41	sp|Q6CFH9|ATP7_YARLI ATP synthase subunit d, mitochondrial OS=Yarrowia lipolytica (strain CLIB 122 / E 150) OX=284591 GN=ATP7 PE=1 SV=1
Unigene0000122	643	608	87	sp|O13350|ATP7_KLULA	174	1	174	48.3	174	90	0	162.2	6.8e-39	sp|O13350|ATP7_KLULA ATP synthase subunit d, mitochondrial OS=Kluyveromyces lactis (strain ATCC 8585 / CBS 2359 / DSM 70799 / NBRC 1267 / NRRL Y-1140 / WM37) OX=284590 GN=ATP7 PE=3 SV=4
Unigene0000122	643	608	87	sp|P30902|ATP7_YEAST	174	1	174	43.1	174	99	0	152.1	7.0e-36	sp|P30902|ATP7_YEAST ATP synthase subunit d, mitochondrial OS=Saccharomyces cerevisiae (strain ATCC 204508 / S288c) OX=559292 GN=ATP7 PE=1 SV=2
Unigene0000122	643	605	87	sp|C0HK60|ATP7_PICAN	175	3	175	43.9	173	97	0	141	1.6e-32	sp|C0HK60|ATP7_PICAN ATP synthase subunit d, mitochondrial OS=Pichia angusta OX=870730 GN=ATP7 PE=1 SV=1
Unigene0000122	643	593	87	sp|O94390|ATP7_SCHPO	175	7	175	34.9	169	110	0	107.5	2.0e-22	sp|O94390|ATP7_SCHPO ATP synthase subunit d, mitochondrial OS=Schizosaccharomyces pombe (strain 972 / ATCC 24843) OX=284812 GN=atp7 PE=3 SV=3
Unigene0000129	2801	125	2548	sp|Q9FF61|SM3L1_ARATH	881	53	881	59.7	842	292	47	942.6	3.5e-273	sp|Q9FF61|SM3L1_ARATH Putative SWI/SNF-related matrix-associated actin-dependent regulator of chromatin subfamily A member 3-like 1 OS=Arabidopsis thaliana OX=3702 GN=At5g05130 PE=2 SV=1
Unigene0000129	2801	131	2548	sp|Q14527|HLTF_HUMAN	1009	56	1009	35.3	963	457	166	533.1	6.4e-150	sp|Q14527|HLTF_HUMAN Helicase-like transcription factor OS=Homo sapiens OX=9606 GN=HLTF PE=1 SV=2
Unigene0000129	2801	131	2548	sp|Q95216|HLTF_RABIT	1005	56	1005	34.7	959	464	162	521.9	1.5e-146	sp|Q95216|HLTF_RABIT Helicase-like transcription factor OS=Oryctolagus cuniculus OX=9986 GN=HLTF PE=1 SV=1
Unigene0000129	2801	131	2548	sp|Q6PCN7|HLTF_MOUSE	1003	56	1003	34.7	959	462	164	520.4	4.3e-146	sp|Q6PCN7|HLTF_MOUSE Helicase-like transcription factor OS=Mus musculus OX=10090 GN=Hltf PE=1 SV=1
Unigene0000129	2801	668	2545	sp|Q9FIY7|SM3L3_ARATH	1277	619	1277	36.6	669	371	53	393.3	7.9e-108	sp|Q9FIY7|SM3L3_ARATH DNA repair protein RAD5B OS=Arabidopsis thaliana OX=3702 GN=RAD5B PE=3 SV=1
Unigene0000129	2801	656	2539	sp|Q9FNI6|SM3L2_ARATH	1029	347	1027	35.6	691	372	73	384.8	2.8e-105	sp|Q9FNI6|SM3L2_ARATH DNA repair protein RAD5A OS=Arabidopsis thaliana OX=3702 GN=RAD5A PE=1 SV=1
Unigene0000129	2801	620	2545	sp|Q6CJM4|RAD5_KLULA	1114	383	1114	31.2	736	408	98	339.3	1.4e-91	sp|Q6CJM4|RAD5_KLULA DNA repair protein RAD5 OS=Kluyveromyces lactis (strain ATCC 8585 / CBS 2359 / DSM 70799 / NBRC 1267 / NRRL Y-1140 / WM37) OX=284590 GN=RAD5 PE=1 SV=1
Unigene0000129	2801	668	2542	sp|Q4IJ84|RAD5_GIBZE	1154	441	1153	32.6	720	383	102	331.3	3.7e-89	sp|Q4IJ84|RAD5_GIBZE DNA repair protein RAD5 OS=Gibberella zeae (strain ATCC MYA-4620 / CBS 123657 / FGSC 9075 / NRRL 31084 / PH-1) OX=229533 GN=RAD5 PE=3 SV=1
Unigene0000129	2801	602	2539	sp|Q753V5|RAD5_EREGS	1085	350	1083	32.4	743	396	106	323.9	5.9e-87	sp|Q753V5|RAD5_EREGS DNA repair protein RAD5 OS=Eremothecium gossypii (strain ATCC 10895 / CBS 109.51 / FGSC 9923 / NRRL Y-1056) OX=284811 GN=RAD5 PE=3 SV=2
Unigene0000129	2801	668	2542	sp|Q7S1P9|RAD5_NEUCR	1228	508	1225	31.6	730	382	117	313.9	6.1e-84	sp|Q7S1P9|RAD5_NEUCR DNA repair protein rad5 OS=Neurospora crassa (strain ATCC 24698 / 74-OR23-1A / CBS 708.71 / DSM 1257 / FGSC 987) OX=367110 GN=mus-41 PE=3 SV=3
Unigene0000129	2801	608	2539	sp|Q4WVM1|RAD5_ASPFU	1245	473	1243	30.9	783	390	151	310.1	8.8e-83	sp|Q4WVM1|RAD5_ASPFU DNA repair protein rad5 OS=Aspergillus fumigatus (strain ATCC MYA-4609 / CBS 101355 / FGSC A1100 / Af293) OX=330879 GN=rad5 PE=3 SV=2
Unigene0000129	2801	563	2539	sp|Q5BHD6|RAD5_EMENI	1202	409	1200	31.1	804	397	157	304.7	3.7e-81	sp|Q5BHD6|RAD5_EMENI DNA repair protein rad5 OS=Emericella nidulans (strain FGSC A4 / ATCC 38163 / CBS 112.46 / NRRL 194 / M139) OX=227321 GN=rad5 PE=3 SV=1
Unigene0000129	2801	656	2539	sp|P36607|RAD5_SCHPO	1133	444	1130	31.2	706	389	97	297.7	4.5e-79	sp|P36607|RAD5_SCHPO DNA repair protein rad8 OS=Schizosaccharomyces pombe (strain 972 / ATCC 24843) OX=284812 GN=rad8 PE=1 SV=1
Unigene0000129	2801	563	2542	sp|Q6C2R8|RAD5_YARLI	1025	341	1023	30.6	728	392	113	290.8	5.5e-77	sp|Q6C2R8|RAD5_YARLI DNA repair protein RAD5 OS=Yarrowia lipolytica (strain CLIB 122 / E 150) OX=284591 GN=RAD5 PE=3 SV=1
Unigene0000129	2801	605	2539	sp|Q6FY76|RAD5_CANGA	1151	405	1148	29.4	752	416	115	289.7	1.2e-76	sp|Q6FY76|RAD5_CANGA DNA repair protein RAD5 OS=Candida glabrata (strain ATCC 2001 / BCRC 20586 / JCM 3761 / NBRC 0622 / NRRL Y-65 / CBS 138) OX=284593 GN=RAD5 PE=3 SV=1
Unigene0000129	2801	755	2539	sp|Q5ACX1|RAD5_CANAL	1084	437	1081	32.5	664	360	88	289.3	1.6e-76	sp|Q5ACX1|RAD5_CANAL DNA repair protein RAD5 OS=Candida albicans (strain SC5314 / ATCC MYA-2876) OX=237561 GN=RAD5 PE=3 SV=2
Unigene0000129	2801	857	2533	sp|Q9LHE4|CHR27_ARATH	1047	368	1042	29.3	680	355	126	287.3	6.1e-76	sp|Q9LHE4|CHR27_ARATH Helicase-like transcription factor CHR27 OS=Arabidopsis thaliana OX=3702 GN=CHR27 PE=1 SV=1
Unigene0000129	2801	551	2470	sp|Q5NC05|TTF2_MOUSE	1138	515	1113	32	668	357	97	281.2	4.4e-74	sp|Q5NC05|TTF2_MOUSE Transcription termination factor 2 OS=Mus musculus OX=10090 GN=Ttf2 PE=1 SV=2
Unigene0000129	2801	755	2539	sp|P32849|RAD5_YEAST	1169	506	1167	31.9	673	369	89	278.9	2.2e-73	sp|P32849|RAD5_YEAST DNA repair protein RAD5 OS=Saccharomyces cerevisiae (strain ATCC 204508 / S288c) OX=559292 GN=RAD5 PE=1 SV=1
Unigene0000129	2801	755	2539	sp|Q6BIP2|RAD5_DEBHA	1190	518	1186	28.5	681	389	98	276.2	1.4e-72	sp|Q6BIP2|RAD5_DEBHA DNA repair protein RAD5 OS=Debaryomyces hansenii (strain ATCC 36239 / CBS 767 / BCRC 21394 / JCM 1990 / NBRC 0083 / IGC 2968) OX=284592 GN=RAD5 PE=3 SV=2
Unigene0000130	1364	1	1362	sp|P07245|C1TC_YEAST	946	278	731	71.7	456	125	4	639	4.0e-182	sp|P07245|C1TC_YEAST C-1-tetrahydrofolate synthase, cytoplasmic OS=Saccharomyces cerevisiae (strain ATCC 204508 / S288c) OX=559292 GN=ADE3 PE=1 SV=1
Unigene0000130	1364	1	1362	sp|Q8WZJ7|C1TC_SCHPO	937	269	721	68.9	454	140	1	630.9	1.1e-179	sp|Q8WZJ7|C1TC_SCHPO C-1-tetrahydrofolate synthase, cytoplasmic OS=Schizosaccharomyces pombe (strain 972 / ATCC 24843) OX=284812 GN=SPBC839.16 PE=3 SV=1
Unigene0000130	1364	1	1362	sp|P09440|C1TM_YEAST	975	302	760	69.5	459	135	5	616.3	2.8e-175	sp|P09440|C1TM_YEAST C-1-tetrahydrofolate synthase, mitochondrial OS=Saccharomyces cerevisiae (strain ATCC 204508 / S288c) OX=559292 GN=MIS1 PE=1 SV=1
Unigene0000130	1364	1	1362	sp|P11586|C1TC_HUMAN	935	273	719	67.5	456	137	11	596.3	3.0e-169	sp|P11586|C1TC_HUMAN C-1-tetrahydrofolate synthase, cytoplasmic OS=Homo sapiens OX=9606 GN=MTHFD1 PE=1 SV=4
Unigene0000130	1364	1	1362	sp|Q922D8|C1TC_MOUSE	935	273	719	66.4	456	142	11	593.2	2.5e-168	sp|Q922D8|C1TC_MOUSE C-1-tetrahydrofolate synthase, cytoplasmic OS=Mus musculus OX=10090 GN=Mthfd1 PE=1 SV=4
Unigene0000130	1364	1	1362	sp|Q5R8P0|C1TC_PONAB	935	273	719	67.1	456	139	11	590.5	1.6e-167	sp|Q5R8P0|C1TC_PONAB C-1-tetrahydrofolate synthase, cytoplasmic OS=Pongo abelii OX=9601 GN=MTHFD1 PE=2 SV=3
Unigene0000130	1364	1	1362	sp|P27653|C1TC_RAT	935	273	719	66.2	456	143	11	590.5	1.6e-167	sp|P27653|C1TC_RAT C-1-tetrahydrofolate synthase, cytoplasmic OS=Rattus norvegicus OX=10116 GN=Mthfd1 PE=1 SV=3
Unigene0000130	1364	16	1362	sp|Q6UB35|C1TM_HUMAN	978	321	762	64.3	451	150	11	567	1.9e-160	sp|Q6UB35|C1TM_HUMAN Monofunctional C1-tetrahydrofolate synthase, mitochondrial OS=Homo sapiens OX=9606 GN=MTHFD1L PE=1 SV=1
Unigene0000130	1364	1	1362	sp|O96553|C1TC_DROME	968	306	752	63.2	456	157	11	566.6	2.5e-160	sp|O96553|C1TC_DROME C-1-tetrahydrofolate synthase, cytoplasmic OS=Drosophila melanogaster OX=7227 GN=pug PE=2 SV=4
Unigene0000130	1364	7	1362	sp|Q0VCR7|C1TM_BOVIN	975	315	759	64.1	454	152	11	564.3	1.3e-159	sp|Q0VCR7|C1TM_BOVIN Monofunctional C1-tetrahydrofolate synthase, mitochondrial OS=Bos taurus OX=9913 GN=MTHFD1L PE=2 SV=2
Unigene0000130	1364	7	1362	sp|Q3V3R1|C1TM_MOUSE	977	317	761	63.9	454	153	11	563.5	2.2e-159	sp|Q3V3R1|C1TM_MOUSE Monofunctional C1-tetrahydrofolate synthase, mitochondrial OS=Mus musculus OX=10090 GN=Mthfd1l PE=1 SV=2
Unigene0000130	1364	1	1362	sp|Q27772|C1TC_SPOFR	933	271	717	63	460	151	19	562.8	3.7e-159	sp|Q27772|C1TC_SPOFR C-1-tetrahydrofolate synthase, cytoplasmic OS=Spodoptera frugiperda OX=7108 PE=2 SV=3
Unigene0000130	1364	1	1362	sp|O43007|C1TM_SCHPO	972	300	755	60.7	458	174	6	544.3	1.4e-153	sp|O43007|C1TM_SCHPO C-1-tetrahydrofolate synthase, mitochondrial OS=Schizosaccharomyces pombe (strain 972 / ATCC 24843) OX=284812 GN=ade9 PE=3 SV=3
Unigene0000130	1364	106	1362	sp|P28723|FTHS_SPIOL	637	11	421	65.2	420	136	10	540	2.5e-152	sp|P28723|FTHS_SPIOL Formate--tetrahydrofolate ligase OS=Spinacia oleracea OX=3562 PE=1 SV=3
Unigene0000130	1364	106	1362	sp|Q9SPK5|FTHS_ARATH	634	8	418	63.6	420	143	10	527.7	1.3e-148	sp|Q9SPK5|FTHS_ARATH Formate--tetrahydrofolate ligase OS=Arabidopsis thaliana OX=3702 GN=THFS PE=2 SV=1
Unigene0000130	1364	124	1362	sp|A4FL80|FTHS_SACEN	565	3	351	51.1	413	138	64	393.3	3.9e-108	sp|A4FL80|FTHS_SACEN Formate--tetrahydrofolate ligase OS=Saccharopolyspora erythraea (strain ATCC 11635 / DSM 40517 / JCM 4748 / NBRC 13426 / NCIMB 8594 / NRRL 2338) OX=405948 GN=fhs PE=3 SV=1
Unigene0000130	1364	130	1362	sp|A5UPV2|FTHS_ROSS1	564	3	349	49.9	411	142	64	374.8	1.4e-102	sp|A5UPV2|FTHS_ROSS1 Formate--tetrahydrofolate ligase OS=Roseiflexus sp. (strain RS-1) OX=357808 GN=fhs PE=3 SV=1
Unigene0000130	1364	130	1362	sp|A7NGQ9|FTHS_ROSCS	564	3	349	49.4	411	144	64	370.5	2.7e-101	sp|A7NGQ9|FTHS_ROSCS Formate--tetrahydrofolate ligase OS=Roseiflexus castenholzii (strain DSM 13941 / HLO8) OX=383372 GN=fhs PE=3 SV=1
Unigene0000130	1364	130	1362	sp|Q1AXZ4|FTHS1_RUBXD	576	6	353	47.3	412	152	65	365.9	6.6e-100	sp|Q1AXZ4|FTHS1_RUBXD Formate--tetrahydrofolate ligase 1 OS=Rubrobacter xylanophilus (strain DSM 9941 / NBRC 16129 / PRD-1) OX=266117 GN=fhs1 PE=3 SV=1
Unigene0000130	1364	130	1362	sp|Q1AVP8|FTHS2_RUBXD	576	6	353	47.3	412	152	65	365.5	8.6e-100	sp|Q1AVP8|FTHS2_RUBXD Formate--tetrahydrofolate ligase 2 OS=Rubrobacter xylanophilus (strain DSM 9941 / NBRC 16129 / PRD-1) OX=266117 GN=fhs2 PE=3 SV=1
Unigene0000131	900	71	898	sp|Q8WZJ7|C1TC_SCHPO	937	1	276	58.3	276	115	0	318.5	8.0e-86	sp|Q8WZJ7|C1TC_SCHPO C-1-tetrahydrofolate synthase, cytoplasmic OS=Schizosaccharomyces pombe (strain 972 / ATCC 24843) OX=284812 GN=SPBC839.16 PE=3 SV=1
Unigene0000131	900	83	898	sp|P09440|C1TM_YEAST	975	38	309	57.7	272	115	0	317.4	1.8e-85	sp|P09440|C1TM_YEAST C-1-tetrahydrofolate synthase, mitochondrial OS=Saccharomyces cerevisiae (strain ATCC 204508 / S288c) OX=559292 GN=MIS1 PE=1 SV=1
Unigene0000131	900	83	898	sp|P07245|C1TC_YEAST	946	6	285	55.4	280	117	8	299.3	5.0e-80	sp|P07245|C1TC_YEAST C-1-tetrahydrofolate synthase, cytoplasmic OS=Saccharomyces cerevisiae (strain ATCC 204508 / S288c) OX=559292 GN=ADE3 PE=1 SV=1
Unigene0000131	900	47	898	sp|O43007|C1TM_SCHPO	972	27	307	51.6	285	133	5	286.6	3.4e-76	sp|O43007|C1TM_SCHPO C-1-tetrahydrofolate synthase, mitochondrial OS=Schizosaccharomyces pombe (strain 972 / ATCC 24843) OX=284812 GN=ade9 PE=3 SV=3
Unigene0000131	900	83	898	sp|O96553|C1TC_DROME	968	41	313	54.7	274	121	3	282.3	6.3e-75	sp|O96553|C1TC_DROME C-1-tetrahydrofolate synthase, cytoplasmic OS=Drosophila melanogaster OX=7227 GN=pug PE=2 SV=4
Unigene0000131	900	65	898	sp|P27653|C1TC_RAT	935	1	280	51.8	280	133	2	276.9	2.7e-73	sp|P27653|C1TC_RAT C-1-tetrahydrofolate synthase, cytoplasmic OS=Rattus norvegicus OX=10116 GN=Mthfd1 PE=1 SV=3
Unigene0000131	900	83	898	sp|Q9LHH7|FOLD2_ARATH	299	12	282	52.9	272	127	1	274.2	1.7e-72	sp|Q9LHH7|FOLD2_ARATH Bifunctional protein FolD 2 OS=Arabidopsis thaliana OX=3702 GN=FOLD2 PE=2 SV=1
Unigene0000131	900	74	898	sp|O65271|FOLD4_ARATH	360	69	342	50.2	275	136	1	269.2	5.5e-71	sp|O65271|FOLD4_ARATH Bifunctional protein FolD 4, chloroplastic OS=Arabidopsis thaliana OX=3702 GN=FOLD4 PE=1 SV=1
Unigene0000131	900	65	898	sp|Q922D8|C1TC_MOUSE	935	1	280	50	280	138	2	268.5	9.5e-71	sp|Q922D8|C1TC_MOUSE C-1-tetrahydrofolate synthase, cytoplasmic OS=Mus musculus OX=10090 GN=Mthfd1 PE=1 SV=4
Unigene0000131	900	98	898	sp|Q27772|C1TC_SPOFR	933	11	278	53.5	269	122	3	267.3	2.1e-70	sp|Q27772|C1TC_SPOFR C-1-tetrahydrofolate synthase, cytoplasmic OS=Spodoptera frugiperda OX=7108 PE=2 SV=3
Unigene0000131	900	65	898	sp|P11586|C1TC_HUMAN	935	1	280	50.7	280	136	2	265.8	6.1e-70	sp|P11586|C1TC_HUMAN C-1-tetrahydrofolate synthase, cytoplasmic OS=Homo sapiens OX=9606 GN=MTHFD1 PE=1 SV=4
Unigene0000131	900	71	898	sp|A0LE04|FOLD_MAGMM	285	1	267	51.1	276	126	9	260.8	2.0e-68	sp|A0LE04|FOLD_MAGMM Bifunctional protein FolD OS=Magnetococcus marinus (strain ATCC BAA-1437 / JCM 17883 / MC-1) OX=156889 GN=folD PE=3 SV=1
Unigene0000131	900	65	898	sp|Q5R8P0|C1TC_PONAB	935	1	280	49.6	280	139	2	260.4	2.6e-68	sp|Q5R8P0|C1TC_PONAB C-1-tetrahydrofolate synthase, cytoplasmic OS=Pongo abelii OX=9601 GN=MTHFD1 PE=2 SV=3
Unigene0000131	900	83	898	sp|A2RVV7|FOLD1_ARATH	352	66	336	51.1	272	132	1	255.4	8.3e-67	sp|A2RVV7|FOLD1_ARATH Bifunctional protein FolD 1, mitochondrial OS=Arabidopsis thaliana OX=3702 GN=FOLD1 PE=2 SV=1
Unigene0000131	900	71	898	sp|Q74EU7|FOLD2_GEOSL	285	1	266	49.6	276	129	10	249.6	4.5e-65	sp|Q74EU7|FOLD2_GEOSL Bifunctional protein FolD 2 OS=Geobacter sulfurreducens (strain ATCC 51573 / DSM 12127 / PCA) OX=243231 GN=folD2 PE=3 SV=1
Unigene0000131	900	71	898	sp|A5GAM5|FOLD_GEOUR	280	1	266	48.2	276	133	10	246.9	2.9e-64	sp|A5GAM5|FOLD_GEOUR Bifunctional protein FolD OS=Geotalea uraniireducens (strain Rf4) OX=351605 GN=folD PE=3 SV=1
Unigene0000131	900	83	898	sp|Q47IX6|FOLD_DECAR	284	6	267	50.4	272	125	10	246.1	5.0e-64	sp|Q47IX6|FOLD_DECAR Bifunctional protein FolD OS=Dechloromonas aromatica (strain RCB) OX=159087 GN=folD PE=3 SV=1
Unigene0000131	900	74	898	sp|Q1D7Y2|FOLD2_MYXXD	288	3	267	49.8	275	128	10	245	1.1e-63	sp|Q1D7Y2|FOLD2_MYXXD Bifunctional protein FolD 2 OS=Myxococcus xanthus (strain DK1622) OX=246197 GN=folD2 PE=3 SV=1
Unigene0000131	900	83	898	sp|A9ISZ5|FOLD_BORPD	294	17	278	49.3	272	128	10	242.3	7.3e-63	sp|A9ISZ5|FOLD_BORPD Bifunctional protein FolD OS=Bordetella petrii (strain ATCC BAA-461 / DSM 12804 / CCUG 43448) OX=340100 GN=folD PE=3 SV=1
Unigene0000131	900	71	898	sp|Q73RS2|FOLD_TREDE	293	1	275	48	279	138	7	241.5	1.2e-62	sp|Q73RS2|FOLD_TREDE Bifunctional protein FolD OS=Treponema denticola (strain ATCC 35405 / DSM 14222 / CIP 103919 / JCM 8153 / KCTC 15104) OX=243275 GN=folD PE=3 SV=1
Unigene0000132	663	5	661	sp|Q8WZJ7|C1TC_SCHPO	937	715	933	60.9	220	84	2	276.9	2.0e-73	sp|Q8WZJ7|C1TC_SCHPO C-1-tetrahydrofolate synthase, cytoplasmic OS=Schizosaccharomyces pombe (strain 972 / ATCC 24843) OX=284812 GN=SPBC839.16 PE=3 SV=1
Unigene0000132	663	2	649	sp|P07245|C1TC_YEAST	946	724	939	60.2	216	86	0	271.2	1.1e-71	sp|P07245|C1TC_YEAST C-1-tetrahydrofolate synthase, cytoplasmic OS=Saccharomyces cerevisiae (strain ATCC 204508 / S288c) OX=559292 GN=ADE3 PE=1 SV=1
Unigene0000132	663	5	649	sp|P09440|C1TM_YEAST	975	754	968	59.1	215	88	0	258.1	9.4e-68	sp|P09440|C1TM_YEAST C-1-tetrahydrofolate synthase, mitochondrial OS=Saccharomyces cerevisiae (strain ATCC 204508 / S288c) OX=559292 GN=MIS1 PE=1 SV=1
Unigene0000132	663	2	661	sp|O43007|C1TM_SCHPO	972	748	968	55.9	222	95	3	257.3	1.6e-67	sp|O43007|C1TM_SCHPO C-1-tetrahydrofolate synthase, mitochondrial OS=Schizosaccharomyces pombe (strain 972 / ATCC 24843) OX=284812 GN=ade9 PE=3 SV=3
Unigene0000132	663	2	661	sp|P28723|FTHS_SPIOL	637	414	633	54.3	221	99	2	235.7	5.0e-61	sp|P28723|FTHS_SPIOL Formate--tetrahydrofolate ligase OS=Spinacia oleracea OX=3562 PE=1 SV=3
Unigene0000132	663	2	661	sp|Q9SPK5|FTHS_ARATH	634	411	630	52.9	221	102	2	235.3	6.5e-61	sp|Q9SPK5|FTHS_ARATH Formate--tetrahydrofolate ligase OS=Arabidopsis thaliana OX=3702 GN=THFS PE=2 SV=1
Unigene0000132	663	5	661	sp|Q922D8|C1TC_MOUSE	935	713	931	51.1	219	107	0	229.2	4.7e-59	sp|Q922D8|C1TC_MOUSE C-1-tetrahydrofolate synthase, cytoplasmic OS=Mus musculus OX=10090 GN=Mthfd1 PE=1 SV=4
Unigene0000132	663	5	661	sp|P27653|C1TC_RAT	935	713	931	50.7	219	108	0	226.9	2.3e-58	sp|P27653|C1TC_RAT C-1-tetrahydrofolate synthase, cytoplasmic OS=Rattus norvegicus OX=10116 GN=Mthfd1 PE=1 SV=3
Unigene0000132	663	5	661	sp|Q5R8P0|C1TC_PONAB	935	713	931	50.2	219	109	0	225.7	5.2e-58	sp|Q5R8P0|C1TC_PONAB C-1-tetrahydrofolate synthase, cytoplasmic OS=Pongo abelii OX=9601 GN=MTHFD1 PE=2 SV=3
Unigene0000132	663	5	661	sp|P11586|C1TC_HUMAN	935	713	931	50.2	219	109	0	225.3	6.8e-58	sp|P11586|C1TC_HUMAN C-1-tetrahydrofolate synthase, cytoplasmic OS=Homo sapiens OX=9606 GN=MTHFD1 PE=1 SV=4
Unigene0000132	663	5	661	sp|Q3V3R1|C1TM_MOUSE	977	755	973	50.2	219	109	0	223.4	2.6e-57	sp|Q3V3R1|C1TM_MOUSE Monofunctional C1-tetrahydrofolate synthase, mitochondrial OS=Mus musculus OX=10090 GN=Mthfd1l PE=1 SV=2
Unigene0000132	663	5	661	sp|Q0VCR7|C1TM_BOVIN	975	753	971	50.7	219	108	0	221.1	1.3e-56	sp|Q0VCR7|C1TM_BOVIN Monofunctional C1-tetrahydrofolate synthase, mitochondrial OS=Bos taurus OX=9913 GN=MTHFD1L PE=2 SV=2
Unigene0000132	663	5	661	sp|Q6UB35|C1TM_HUMAN	978	756	974	49.8	219	110	0	220.7	1.7e-56	sp|Q6UB35|C1TM_HUMAN Monofunctional C1-tetrahydrofolate synthase, mitochondrial OS=Homo sapiens OX=9606 GN=MTHFD1L PE=1 SV=1
Unigene0000132	663	14	643	sp|A4J0S6|FTHS_DESRM	567	349	558	49.5	210	106	0	207.2	1.9e-52	sp|A4J0S6|FTHS_DESRM Formate--tetrahydrofolate ligase OS=Desulforamulus reducens (strain ATCC BAA-1160 / DSM 100696 / MI-1) OX=349161 GN=fhs PE=3 SV=1
Unigene0000132	663	5	661	sp|O96553|C1TC_DROME	968	746	964	45.2	219	120	0	206.8	2.5e-52	sp|O96553|C1TC_DROME C-1-tetrahydrofolate synthase, cytoplasmic OS=Drosophila melanogaster OX=7227 GN=pug PE=2 SV=4
Unigene0000132	663	2	661	sp|A0KIN9|FTHS_AERHH	576	354	572	44.5	220	121	1	194.5	1.3e-48	sp|A0KIN9|FTHS_AERHH Formate--tetrahydrofolate ligase OS=Aeromonas hydrophila subsp. hydrophila (strain ATCC 7966 / DSM 30187 / BCRC 13018 / CCUG 14551 / JCM 1027 / KCTC 2358 / NCIMB 9240 / NCTC 8049) OX=380703 GN=fhs PE=3 SV=1
Unigene0000132	663	5	649	sp|A5UPV2|FTHS_ROSS1	564	343	557	47	215	114	0	191.4	1.1e-47	sp|A5UPV2|FTHS_ROSS1 Formate--tetrahydrofolate ligase OS=Roseiflexus sp. (strain RS-1) OX=357808 GN=fhs PE=3 SV=1
Unigene0000132	663	5	649	sp|A7NGQ9|FTHS_ROSCS	564	343	557	46.5	215	115	0	191	1.4e-47	sp|A7NGQ9|FTHS_ROSCS Formate--tetrahydrofolate ligase OS=Roseiflexus castenholzii (strain DSM 13941 / HLO8) OX=383372 GN=fhs PE=3 SV=1
Unigene0000132	663	14	661	sp|A8MIN1|FTHS_ALKOO	556	339	552	46.1	217	113	4	189.9	3.1e-47	sp|A8MIN1|FTHS_ALKOO Formate--tetrahydrofolate ligase OS=Alkaliphilus oremlandii (strain OhILAs) OX=350688 GN=fhs PE=3 SV=1
Unigene0000132	663	44	649	sp|A1B1M8|FTHS_PARDP	555	348	548	47.5	202	105	1	186	4.5e-46	sp|A1B1M8|FTHS_PARDP Formate--tetrahydrofolate ligase OS=Paracoccus denitrificans (strain Pd 1222) OX=318586 GN=fhs1 PE=3 SV=1
Unigene0000144	486	2	262	sp|A2YP56|ANM3_ORYSI	620	534	620	67.8	87	28	0	126.7	2.4e-28	sp|A2YP56|ANM3_ORYSI Probable protein arginine N-methyltransferase 3 OS=Oryza sativa subsp. indica OX=39946 GN=PRMT3 PE=3 SV=1
Unigene0000144	486	2	262	sp|A3BMN9|ANM3_ORYSJ	620	534	620	67.8	87	28	0	126.7	2.4e-28	sp|A3BMN9|ANM3_ORYSJ Probable protein arginine N-methyltransferase 3 OS=Oryza sativa subsp. japonica OX=39947 GN=PRMT3 PE=2 SV=1
Unigene0000144	486	2	262	sp|Q0WVD6|ANM3_ARATH	601	513	601	58.4	89	35	2	113.6	2.1e-24	sp|Q0WVD6|ANM3_ARATH Probable protein arginine N-methyltransferase 3 OS=Arabidopsis thaliana OX=3702 GN=PRMT3 PE=2 SV=1
Unigene0000152	376	5	106	sp|Q9C8Y4|ATA15_ARATH	417	367	400	79.4	34	7	0	58.9	4.7e-08	sp|Q9C8Y4|ATA15_ARATH Senescence-associated protein AAF, chloroplastic OS=Arabidopsis thaliana OX=3702 GN=AAF PE=2 SV=1
Unigene0000152	376	5	112	sp|Q65XF2|OSA15_ORYSJ	457	405	440	63.9	36	13	0	52.4	4.4e-06	sp|Q65XF2|OSA15_ORYSJ Senescence-associated protein OSA15, chloroplastic OS=Oryza sativa subsp. japonica OX=39947 GN=OSA15 PE=1 SV=1
Unigene0000154	564	2	244	sp|C0LGG8|Y5343_ARATH	1038	916	997	45.8	83	42	3	58.5	9.3e-08	sp|C0LGG8|Y5343_ARATH Probable LRR receptor-like serine/threonine-protein kinase At1g53430 OS=Arabidopsis thaliana OX=3702 GN=At1g53430 PE=1 SV=1
Unigene0000154	564	2	178	sp|C0LGG9|Y5344_ARATH	1035	914	974	49.2	61	29	2	54.3	1.8e-06	sp|C0LGG9|Y5344_ARATH Probable LRR receptor-like serine/threonine-protein kinase At1g53440 OS=Arabidopsis thaliana OX=3702 GN=At1g53440 PE=2 SV=2
Unigene0000155	441	30	440	sp|A6SDR8|GAR1_BOTFB	221	1	137	88.3	137	16	0	214.2	1.0e-54	sp|A6SDR8|GAR1_BOTFB H/ACA ribonucleoprotein complex subunit GAR1 OS=Botryotinia fuckeliana (strain B05.10) OX=332648 GN=GAR1 PE=3 SV=1
Unigene0000155	441	141	440	sp|Q1E6M1|GAR1_COCIM	203	31	130	83	100	17	0	179.9	2.2e-44	sp|Q1E6M1|GAR1_COCIM H/ACA ribonucleoprotein complex subunit GAR1 OS=Coccidioides immitis (strain RS) OX=246410 GN=GAR1 PE=3 SV=1
Unigene0000155	441	141	440	sp|A1CVY3|GAR1_NEOFI	209	31	130	82	100	18	0	178.3	6.3e-44	sp|A1CVY3|GAR1_NEOFI H/ACA ribonucleoprotein complex subunit gar1 OS=Neosartorya fischeri (strain ATCC 1020 / DSM 3700 / CBS 544.65 / FGSC A1164 / JCM 1740 / NRRL 181 / WB 181) OX=331117 GN=gar1 PE=3 SV=1
Unigene0000155	441	141	440	sp|Q2HH48|GAR1_CHAGB	210	28	127	79	100	21	0	174.9	7.0e-43	sp|Q2HH48|GAR1_CHAGB H/ACA ribonucleoprotein complex subunit GAR1 OS=Chaetomium globosum (strain ATCC 6205 / CBS 148.51 / DSM 1962 / NBRC 6347 / NRRL 1970) OX=306901 GN=GAR1 PE=3 SV=1
Unigene0000155	441	141	440	sp|Q6BVF9|GAR1_DEBHA	215	20	119	74	100	26	0	166	3.2e-40	sp|Q6BVF9|GAR1_DEBHA H/ACA ribonucleoprotein complex subunit GAR1 OS=Debaryomyces hansenii (strain ATCC 36239 / CBS 767 / BCRC 21394 / JCM 1990 / NBRC 0083 / IGC 2968) OX=284592 GN=GAR1 PE=3 SV=1
Unigene0000155	441	141	440	sp|A3GHP2|GAR1_PICST	202	20	119	74	100	26	0	164.1	1.2e-39	sp|A3GHP2|GAR1_PICST H/ACA ribonucleoprotein complex subunit GAR1 OS=Scheffersomyces stipitis (strain ATCC 58785 / CBS 6054 / NBRC 10063 / NRRL Y-11545) OX=322104 GN=GAR1 PE=3 SV=1
Unigene0000155	441	153	440	sp|P28007|GAR1_YEAST	205	32	127	76	96	23	0	163.3	2.1e-39	sp|P28007|GAR1_YEAST H/ACA ribonucleoprotein complex subunit GAR1 OS=Saccharomyces cerevisiae (strain ATCC 204508 / S288c) OX=559292 GN=GAR1 PE=1 SV=1
Unigene0000155	441	153	440	sp|Q6FSB0|GAR1_CANGA	222	33	128	74	96	25	0	162.5	3.6e-39	sp|Q6FSB0|GAR1_CANGA H/ACA ribonucleoprotein complex subunit GAR1 OS=Candida glabrata (strain ATCC 2001 / BCRC 20586 / JCM 3761 / NBRC 0622 / NRRL Y-65 / CBS 138) OX=284593 GN=GAR1 PE=3 SV=1
Unigene0000155	441	153	440	sp|Q6CJ45|GAR1_KLULA	219	30	125	71.9	96	27	0	157.9	8.8e-38	sp|Q6CJ45|GAR1_KLULA H/ACA ribonucleoprotein complex subunit GAR1 OS=Kluyveromyces lactis (strain ATCC 8585 / CBS 2359 / DSM 70799 / NBRC 1267 / NRRL Y-1140 / WM37) OX=284590 GN=GAR1 PE=3 SV=1
Unigene0000155	441	141	440	sp|Q757V8|GAR1_EREGS	212	29	128	69	100	31	0	155.6	4.4e-37	sp|Q757V8|GAR1_EREGS H/ACA ribonucleoprotein complex subunit GAR1 OS=Eremothecium gossypii (strain ATCC 10895 / CBS 109.51 / FGSC 9923 / NRRL Y-1056) OX=284811 GN=GAR1 PE=3 SV=1
Unigene0000155	441	150	440	sp|Q06975|GAR1_SCHPO	194	24	120	67	97	32	0	155.6	4.4e-37	sp|Q06975|GAR1_SCHPO H/ACA ribonucleoprotein complex subunit gar1 OS=Schizosaccharomyces pombe (strain 972 / ATCC 24843) OX=284812 GN=gar1 PE=2 SV=1
Unigene0000155	441	153	440	sp|Q4P5P0|GAR1_USTMA	227	40	136	69.1	97	29	1	146	3.5e-34	sp|Q4P5P0|GAR1_USTMA H/ACA ribonucleoprotein complex subunit GAR1 OS=Ustilago maydis (strain 521 / FGSC 9021) OX=237631 GN=GAR1 PE=3 SV=1
Unigene0000155	441	141	440	sp|P0CN79|GAR1_CRYNB	203	31	131	66.3	101	33	1	143.3	2.2e-33	sp|P0CN79|GAR1_CRYNB H/ACA ribonucleoprotein complex subunit GAR1 OS=Cryptococcus neoformans var. neoformans serotype D (strain B-3501A) OX=283643 GN=GAR1 PE=3 SV=1
Unigene0000155	441	141	440	sp|P0CN78|GAR1_CRYNJ	205	31	131	66.3	101	33	1	143.3	2.2e-33	sp|P0CN78|GAR1_CRYNJ H/ACA ribonucleoprotein complex subunit GAR1 OS=Cryptococcus neoformans var. neoformans serotype D (strain JEC21 / ATCC MYA-565) OX=214684 GN=GAR1 PE=3 SV=2
Unigene0000155	441	147	440	sp|Q9FK53|NLAL2_ARATH	189	38	135	61.2	98	38	0	133.3	2.3e-30	sp|Q9FK53|NLAL2_ARATH H/ACA ribonucleoprotein complex subunit 1-like protein 2 OS=Arabidopsis thaliana OX=3702 GN=At5g18180 PE=2 SV=1
Unigene0000155	441	144	440	sp|Q8VZT0|NLAL1_ARATH	202	50	148	61.6	99	38	0	131.7	6.8e-30	sp|Q8VZT0|NLAL1_ARATH Putative H/ACA ribonucleoprotein complex subunit 1-like protein 1 OS=Arabidopsis thaliana OX=3702 GN=At3g03920 PE=2 SV=1
Unigene0000155	441	144	437	sp|Q7ZVE0|GAR1_DANRE	226	56	155	54	100	44	2	119.8	2.7e-26	sp|Q7ZVE0|GAR1_DANRE H/ACA ribonucleoprotein complex subunit 1 OS=Danio rerio OX=7955 GN=gar1 PE=2 SV=1
Unigene0000155	441	147	437	sp|Q5RJV1|GAR1_XENTR	218	56	154	54.5	99	43	2	119	4.5e-26	sp|Q5RJV1|GAR1_XENTR H/ACA ribonucleoprotein complex subunit 1 OS=Xenopus tropicalis OX=8364 GN=gar1 PE=2 SV=1
Unigene0000155	441	144	437	sp|Q9NY12|GAR1_HUMAN	217	62	161	54	100	44	2	118.2	7.7e-26	sp|Q9NY12|GAR1_HUMAN H/ACA ribonucleoprotein complex subunit 1 OS=Homo sapiens OX=9606 GN=GAR1 PE=1 SV=1
Unigene0000155	441	144	437	sp|Q6AYA1|GAR1_RAT	226	64	163	53	100	45	2	117.5	1.3e-25	sp|Q6AYA1|GAR1_RAT H/ACA ribonucleoprotein complex subunit 1 OS=Rattus norvegicus OX=10116 GN=Gar1 PE=2 SV=1
Unigene0000159	2302	2130	1081	sp|Q9LHN9|IQM2_ARATH	605	1	337	60.2	354	120	21	411	3.0e-113	sp|Q9LHN9|IQM2_ARATH IQ domain-containing protein IQM2 OS=Arabidopsis thaliana OX=3702 GN=IQM2 PE=2 SV=1
Unigene0000159	2302	779	150	sp|Q9LHN9|IQM2_ARATH	605	336	573	40.2	241	110	34	154.1	6.6e-36	sp|Q9LHN9|IQM2_ARATH IQ domain-containing protein IQM2 OS=Arabidopsis thaliana OX=3702 GN=IQM2 PE=2 SV=1
Unigene0000159	2302	2022	1081	sp|Q9M2G8|IQM6_ARATH	575	7	325	61.7	324	109	15	375.6	1.4e-102	sp|Q9M2G8|IQM6_ARATH IQ domain-containing protein IQM6 OS=Arabidopsis thaliana OX=3702 GN=IQM6 PE=2 SV=1
Unigene0000159	2302	779	156	sp|Q9M2G8|IQM6_ARATH	575	324	546	37.8	230	114	29	129.8	1.3e-28	sp|Q9M2G8|IQM6_ARATH IQ domain-containing protein IQM6 OS=Arabidopsis thaliana OX=3702 GN=IQM6 PE=2 SV=1
Unigene0000159	2302	1767	1081	sp|O64851|IQM4_ARATH	532	139	363	72.5	229	59	4	328.9	1.5e-88	sp|O64851|IQM4_ARATH IQ domain-containing protein IQM4 OS=Arabidopsis thaliana OX=3702 GN=IQM4 PE=2 SV=1
Unigene0000159	2302	791	117	sp|O64851|IQM4_ARATH	532	358	506	30.5	226	79	78	97.1	9.6e-19	sp|O64851|IQM4_ARATH IQ domain-containing protein IQM4 OS=Arabidopsis thaliana OX=3702 GN=IQM4 PE=2 SV=1
Unigene0000159	2302	1965	1081	sp|O82645|IQM1_ARATH	488	35	333	60.5	304	106	14	323.2	8.3e-87	sp|O82645|IQM1_ARATH IQ domain-containing protein IQM1 OS=Arabidopsis thaliana OX=3702 GN=IQM1 PE=1 SV=1
Unigene0000159	2302	779	117	sp|O82645|IQM1_ARATH	488	332	467	33.5	221	62	85	102.1	3.0e-20	sp|O82645|IQM1_ARATH IQ domain-containing protein IQM1 OS=Arabidopsis thaliana OX=3702 GN=IQM1 PE=1 SV=1
Unigene0000159	2302	1767	1081	sp|Q058N0|IQM5_ARATH	495	134	354	64.2	229	74	8	301.6	2.6e-80	sp|Q058N0|IQM5_ARATH IQ domain-containing protein IQM5 OS=Arabidopsis thaliana OX=3702 GN=IQM5 PE=2 SV=1
Unigene0000159	2302	779	102	sp|Q058N0|IQM5_ARATH	495	353	482	28.9	228	62	100	91.3	5.3e-17	sp|Q058N0|IQM5_ARATH IQ domain-containing protein IQM5 OS=Arabidopsis thaliana OX=3702 GN=IQM5 PE=2 SV=1
Unigene0000159	2302	1785	952	sp|Q9LFA4|IQM3_ARATH	456	43	325	52.5	284	128	7	296.6	8.3e-79	sp|Q9LFA4|IQM3_ARATH IQ domain-containing protein IQM3 OS=Arabidopsis thaliana OX=3702 GN=IQM3 PE=2 SV=1
Unigene0000159	2302	779	147	sp|Q9LFA4|IQM3_ARATH	456	275	445	33.2	211	101	40	84.3	6.5e-15	sp|Q9LFA4|IQM3_ARATH IQ domain-containing protein IQM3 OS=Arabidopsis thaliana OX=3702 GN=IQM3 PE=2 SV=1
Unigene0000160	734	80	553	sp|A6S6B0|NACB_BOTFB	159	1	159	86.8	159	20	1	231.5	1.0e-59	sp|A6S6B0|NACB_BOTFB Nascent polypeptide-associated complex subunit beta OS=Botryotinia fuckeliana (strain B05.10) OX=332648 GN=egd1 PE=3 SV=1
Unigene0000160	734	80	553	sp|A7F9B8|NACB_SCLS1	159	1	159	85.5	159	22	1	231.5	1.0e-59	sp|A7F9B8|NACB_SCLS1 Nascent polypeptide-associated complex subunit beta OS=Sclerotinia sclerotiorum (strain ATCC 18683 / 1980 / Ss-1) OX=665079 GN=egd1 PE=3 SV=1
Unigene0000160	734	80	421	sp|Q0ULD0|NACB_PHANO	160	1	112	88.6	114	11	2	196.8	2.8e-49	sp|Q0ULD0|NACB_PHANO Nascent polypeptide-associated complex subunit beta OS=Phaeosphaeria nodorum (strain SN15 / ATCC MYA-4574 / FGSC 10173) OX=321614 GN=EGD1 PE=3 SV=1
Unigene0000160	734	80	553	sp|A6R5Z3|NACB_AJECN	158	1	158	73.1	160	39	4	191	1.6e-47	sp|A6R5Z3|NACB_AJECN Nascent polypeptide-associated complex subunit beta OS=Ajellomyces capsulatus (strain NAm1 / WU24) OX=2059318 GN=EGD1 PE=3 SV=1
Unigene0000160	734	80	553	sp|A2R091|NACB_ASPNC	155	1	155	65.8	158	51	3	189.1	5.9e-47	sp|A2R091|NACB_ASPNC Nascent polypeptide-associated complex subunit beta OS=Aspergillus niger (strain ATCC MYA-4892 / CBS 513.88 / FGSC A1513) OX=425011 GN=egd1 PE=3 SV=1
Unigene0000160	734	80	553	sp|A1CMP1|NACB_ASPCL	164	1	164	63	165	53	8	184.5	1.5e-45	sp|A1CMP1|NACB_ASPCL Nascent polypeptide-associated complex subunit beta OS=Aspergillus clavatus (strain ATCC 1007 / CBS 513.65 / DSM 816 / NCTC 3887 / NRRL 1 / QM 1276 / 107) OX=344612 GN=egd1 PE=3 SV=1
Unigene0000160	734	80	421	sp|Q1DI23|NACB_COCIM	155	1	113	84.3	115	15	3	183.7	2.5e-45	sp|Q1DI23|NACB_COCIM Nascent polypeptide-associated complex subunit beta OS=Coccidioides immitis (strain RS) OX=246410 GN=EGD1 PE=3 SV=1
Unigene0000160	734	80	421	sp|Q5ASI4|NACB_EMENI	165	1	124	76.2	126	16	14	181.4	1.2e-44	sp|Q5ASI4|NACB_EMENI Nascent polypeptide-associated complex subunit beta OS=Emericella nidulans (strain FGSC A4 / ATCC 38163 / CBS 112.46 / NRRL 194 / M139) OX=227321 GN=egd1 PE=3 SV=1
Unigene0000160	734	134	553	sp|Q4WCX4|NACB_ASPFU	186	49	186	68.6	140	42	2	180.3	2.8e-44	sp|Q4WCX4|NACB_ASPFU Nascent polypeptide-associated complex subunit beta OS=Aspergillus fumigatus (strain ATCC MYA-4609 / CBS 101355 / FGSC A1100 / Af293) OX=330879 GN=egd1 PE=3 SV=1
Unigene0000160	734	134	553	sp|A1DL98|NACB_NEOFI	183	46	183	68.6	140	42	2	180.3	2.8e-44	sp|A1DL98|NACB_NEOFI Nascent polypeptide-associated complex subunit beta OS=Neosartorya fischeri (strain ATCC 1020 / DSM 3700 / CBS 544.65 / FGSC A1164 / JCM 1740 / NRRL 181 / WB 181) OX=331117 GN=egd1 PE=3 SV=1
Unigene0000160	734	89	421	sp|Q2H4X9|NACB_CHAGB	150	6	115	83.8	111	17	1	178.3	1.0e-43	sp|Q2H4X9|NACB_CHAGB Nascent polypeptide-associated complex subunit beta OS=Chaetomium globosum (strain ATCC 6205 / CBS 148.51 / DSM 1962 / NBRC 6347 / NRRL 1970) OX=306901 GN=EGD1 PE=3 SV=1
Unigene0000160	734	122	553	sp|Q2U6N1|NACB_ASPOR	196	54	196	65.3	144	49	1	177.2	2.3e-43	sp|Q2U6N1|NACB_ASPOR Nascent polypeptide-associated complex subunit beta OS=Aspergillus oryzae (strain ATCC 42149 / RIB 40) OX=510516 GN=egd1 PE=3 SV=1
Unigene0000160	734	80	421	sp|Q0CGL5|NACB_ASPTN	167	1	124	72.6	124	24	10	174.9	1.2e-42	sp|Q0CGL5|NACB_ASPTN Nascent polypeptide-associated complex subunit beta OS=Aspergillus terreus (strain NIH 2624 / FGSC A1156) OX=341663 GN=egd1 PE=3 SV=1
Unigene0000160	734	89	421	sp|Q4I283|NACB_GIBZE	153	6	115	82.1	112	17	3	174.5	1.5e-42	sp|Q4I283|NACB_GIBZE Nascent polypeptide-associated complex subunit beta OS=Gibberella zeae (strain ATCC MYA-4620 / CBS 123657 / FGSC 9075 / NRRL 31084 / PH-1) OX=229533 GN=EGD1 PE=3 SV=3
Unigene0000160	734	134	553	sp|A4RC23|NACB_PYRO7	172	38	172	67.9	140	40	5	172.9	4.4e-42	sp|A4RC23|NACB_PYRO7 Nascent polypeptide-associated complex subunit beta OS=Pyricularia oryzae (strain 70-15 / ATCC MYA-4617 / FGSC 8958) OX=242507 GN=EGD1 PE=3 SV=2
Unigene0000160	734	89	553	sp|Q7SDU4|NACB_NEUCR	152	6	152	62.6	155	50	8	170.6	2.2e-41	sp|Q7SDU4|NACB_NEUCR Nascent polypeptide-associated complex subunit beta OS=Neurospora crassa (strain ATCC 24698 / 74-OR23-1A / CBS 708.71 / DSM 1257 / FGSC 987) OX=367110 GN=npc-2 PE=3 SV=2
Unigene0000160	734	77	421	sp|Q4P9Y9|NACB_USTMA	166	2	114	67.8	115	35	2	156	5.6e-37	sp|Q4P9Y9|NACB_USTMA Nascent polypeptide-associated complex subunit beta OS=Ustilago maydis (strain 521 / FGSC 9021) OX=237631 GN=EGD1 PE=3 SV=1
Unigene0000160	734	80	421	sp|P0CP09|NACB_CRYNB	175	1	115	70.3	118	28	7	151	1.8e-35	sp|P0CP09|NACB_CRYNB Nascent polypeptide-associated complex subunit beta OS=Cryptococcus neoformans var. neoformans serotype D (strain B-3501A) OX=283643 GN=EGD1 PE=3 SV=1
Unigene0000160	734	80	421	sp|P0CP08|NACB_CRYNJ	175	1	115	70.3	118	28	7	151	1.8e-35	sp|P0CP08|NACB_CRYNJ Nascent polypeptide-associated complex subunit beta OS=Cryptococcus neoformans var. neoformans serotype D (strain JEC21 / ATCC MYA-565) OX=214684 GN=EGD1 PE=3 SV=1
Unigene0000160	734	89	415	sp|Q18885|BTF3_CAEEL	161	8	117	60	110	43	1	134	2.3e-30	sp|Q18885|BTF3_CAEEL Transcription factor BTF3 homolog OS=Caenorhabditis elegans OX=6239 GN=icd-1 PE=1 SV=1
Unigene0000168	1403	53	1144	sp|Q10716|CYSP1_MAIZE	371	4	371	69.9	372	100	12	530.8	1.6e-149	sp|Q10716|CYSP1_MAIZE Cysteine proteinase 1 OS=Zea mays OX=4577 GN=CCP1 PE=2 SV=1
Unigene0000168	1403	77	1138	sp|P43296|RD19A_ARATH	368	17	365	70.1	354	101	5	518.1	1.1e-145	sp|P43296|RD19A_ARATH Cysteine protease RD19A OS=Arabidopsis thaliana OX=3702 GN=RD19A PE=1 SV=1
Unigene0000168	1403	50	1126	sp|P43295|RD19B_ARATH	361	5	358	68.5	359	108	5	514.2	1.5e-144	sp|P43295|RD19B_ARATH Probable cysteine protease RD19B OS=Arabidopsis thaliana OX=3702 GN=RD19B PE=2 SV=2
Unigene0000168	1403	44	1138	sp|Q9SUL1|RD19C_ARATH	373	5	371	65	369	123	6	489.6	4.1e-137	sp|Q9SUL1|RD19C_ARATH Probable cysteine protease RD19C OS=Arabidopsis thaliana OX=3702 GN=RD19C PE=2 SV=1
Unigene0000168	1403	53	1126	sp|P25804|CYSP_PEA	363	4	358	65.7	361	115	9	481.1	1.4e-134	sp|P25804|CYSP_PEA Cysteine proteinase 15A OS=Pisum sativum OX=3888 PE=2 SV=1
Unigene0000168	1403	44	1123	sp|Q8VYS0|RD19D_ARATH	367	1	362	55.9	363	156	4	422.9	4.7e-117	sp|Q8VYS0|RD19D_ARATH Probable cysteine protease RD19D OS=Arabidopsis thaliana OX=3702 GN=RD19D PE=2 SV=1
Unigene0000168	1403	68	1117	sp|P04988|CYSP1_DICDI	343	5	340	45	360	164	34	289.7	6.2e-77	sp|P04988|CYSP1_DICDI Cysteine proteinase 1 OS=Dictyostelium discoideum OX=44689 GN=cprA PE=2 SV=2
Unigene0000168	1403	167	1117	sp|Q9UBX1|CATF_HUMAN	484	178	480	43.6	321	159	22	243.4	5.1e-63	sp|Q9UBX1|CATF_HUMAN Cathepsin F OS=Homo sapiens OX=9606 GN=CTSF PE=1 SV=1
Unigene0000168	1403	194	1117	sp|Q9VN93|CATF_DROME	614	308	610	42.2	315	163	19	236.9	4.7e-61	sp|Q9VN93|CATF_DROME Cathepsin F OS=Drosophila melanogaster OX=7227 GN=CtsF PE=2 SV=2
Unigene0000168	1403	140	1117	sp|Q9R013|CATF_MOUSE	462	151	458	42.1	330	165	26	236.5	6.2e-61	sp|Q9R013|CATF_MOUSE Cathepsin F OS=Mus musculus OX=10090 GN=Ctsf PE=1 SV=1
Unigene0000168	1403	179	1117	sp|Q26534|CATL_SCHMA	319	15	315	39.3	318	171	22	235	1.8e-60	sp|Q26534|CATL_SCHMA Cathepsin L OS=Schistosoma mansoni OX=6183 GN=CL1 PE=2 SV=1
Unigene0000168	1403	194	1114	sp|Q9LM66|XCP2_ARATH	356	51	350	40.6	318	160	29	227.3	3.8e-58	sp|Q9LM66|XCP2_ARATH Cysteine protease XCP2 OS=Arabidopsis thaliana OX=3702 GN=XCP2 PE=1 SV=2
Unigene0000168	1403	185	1117	sp|P14658|CYSP_TRYBB	450	38	336	40.9	318	162	26	225.3	1.4e-57	sp|P14658|CYSP_TRYBB Cysteine proteinase OS=Trypanosoma brucei brucei OX=5702 PE=1 SV=1
Unigene0000168	1403	188	1078	sp|P43297|RD21A_ARATH	462	48	333	41	305	153	27	221.9	1.6e-56	sp|P43297|RD21A_ARATH Cysteine proteinase RD21A OS=Arabidopsis thaliana OX=3702 GN=RD21A PE=1 SV=1
Unigene0000168	1403	182	1114	sp|Q9LT78|RD21C_ARATH	452	39	342	39	323	166	31	221.9	1.6e-56	sp|Q9LT78|RD21C_ARATH Probable cysteine protease RD21C OS=Arabidopsis thaliana OX=3702 GN=RD21C PE=1 SV=1
Unigene0000168	1403	176	1114	sp|P54640|CYSP5_DICDI	344	24	340	37.1	329	179	28	219.2	1.0e-55	sp|P54640|CYSP5_DICDI Cysteine proteinase 5 OS=Dictyostelium discoideum OX=44689 GN=cprE PE=2 SV=2
Unigene0000168	1403	188	1078	sp|B2LSD2|MUCIN_MUCPR	430	10	297	40.2	306	156	27	219.2	1.0e-55	sp|B2LSD2|MUCIN_MUCPR Cysteine proteinase mucunain (Fragment) OS=Mucuna pruriens OX=157652 GN=MUCUNAIN PE=1 SV=2
Unigene0000168	1403	65	1135	sp|P35591|CYSP1_LEIPI	354	6	346	37.8	368	191	38	218.8	1.3e-55	sp|P35591|CYSP1_LEIPI Cysteine proteinase 1 OS=Leishmania pifanoi OX=5682 GN=CYS1 PE=2 SV=2
Unigene0000168	1403	65	1135	sp|P25775|LMCPA_LEIME	354	6	346	37.6	372	186	46	218.4	1.7e-55	sp|P25775|LMCPA_LEIME Cysteine proteinase A OS=Leishmania mexicana OX=5665 GN=LMCPA PE=2 SV=1
Unigene0000168	1403	59	1078	sp|Q9FMH8|RD21B_ARATH	463	6	334	38.4	349	186	29	218	2.3e-55	sp|Q9FMH8|RD21B_ARATH Probable cysteine protease RD21B OS=Arabidopsis thaliana OX=3702 GN=RD21B PE=1 SV=1
Unigene0000170	1500	3	230	sp|Q8L7M0|TUN_ARATH	465	363	438	76.3	76	18	0	123.2	8.2e-27	sp|Q8L7M0|TUN_ARATH UDP-glycosyltransferase TURAN OS=Arabidopsis thaliana OX=3702 GN=TUN PE=2 SV=1
Unigene0000170	1500	3	209	sp|Q5R7A2|ALG1_PONAB	464	370	438	63.8	69	25	0	91.7	2.6e-17	sp|Q5R7A2|ALG1_PONAB Chitobiosyldiphosphodolichol beta-mannosyltransferase OS=Pongo abelii OX=9601 GN=ALG1 PE=2 SV=1
Unigene0000170	1500	3	209	sp|Q9BT22|ALG1_HUMAN	464	370	438	63.8	69	25	0	91.3	3.4e-17	sp|Q9BT22|ALG1_HUMAN Chitobiosyldiphosphodolichol beta-mannosyltransferase OS=Homo sapiens OX=9606 GN=ALG1 PE=1 SV=2
Unigene0000170	1500	3	209	sp|Q921Q3|ALG1_MOUSE	482	370	438	60.9	69	27	0	88.2	2.9e-16	sp|Q921Q3|ALG1_MOUSE Chitobiosyldiphosphodolichol beta-mannosyltransferase OS=Mus musculus OX=10090 GN=Alg1 PE=1 SV=3
Unigene0000170	1500	3	176	sp|C9J202|AG1L2_HUMAN	215	154	211	62.1	58	22	0	71.2	3.7e-11	sp|C9J202|AG1L2_HUMAN Putative glycosyltransferase ALG1L2 OS=Homo sapiens OX=9606 GN=ALG1L2 PE=3 SV=1
Unigene0000170	1500	3	167	sp|P90522|ALG1_DICDI	493	361	415	63.6	55	20	0	71.2	3.7e-11	sp|P90522|ALG1_DICDI Chitobiosyldiphosphodolichol beta-mannosyltransferase OS=Dictyostelium discoideum OX=44689 GN=alg1 PE=2 SV=1
Unigene0000170	1500	3	221	sp|O13933|ALG1_SCHPO	424	333	401	47.9	73	34	4	66.2	1.2e-09	sp|O13933|ALG1_SCHPO Chitobiosyldiphosphodolichol beta-mannosyltransferase OS=Schizosaccharomyces pombe (strain 972 / ATCC 24843) OX=284812 GN=alg1 PE=3 SV=2
Unigene0000170	1500	3	221	sp|Q59Q79|ALG1_CANAL	456	361	433	43.8	73	41	0	65.9	1.6e-09	sp|Q59Q79|ALG1_CANAL Chitobiosyldiphosphodolichol beta-mannosyltransferase OS=Candida albicans (strain SC5314 / ATCC MYA-2876) OX=237561 GN=ALG1 PE=3 SV=1
Unigene0000170	1500	3	221	sp|Q6C3K2|ALG1_YARLI	463	351	419	43.8	73	37	4	65.1	2.6e-09	sp|Q6C3K2|ALG1_YARLI Chitobiosyldiphosphodolichol beta-mannosyltransferase OS=Yarrowia lipolytica (strain CLIB 122 / E 150) OX=284591 GN=ALG1 PE=3 SV=1
Unigene0000170	1500	3	221	sp|Q6FLZ2|ALG1_CANGA	450	360	428	43.8	73	37	4	62	2.2e-08	sp|Q6FLZ2|ALG1_CANGA Chitobiosyldiphosphodolichol beta-mannosyltransferase OS=Candida glabrata (strain ATCC 2001 / BCRC 20586 / JCM 3761 / NBRC 0622 / NRRL Y-65 / CBS 138) OX=284593 GN=ALG1 PE=3 SV=1
Unigene0000170	1500	3	170	sp|P16661|ALG1_YEAST	449	359	414	50	56	28	0	58.9	1.9e-07	sp|P16661|ALG1_YEAST Chitobiosyldiphosphodolichol beta-mannosyltransferase OS=Saccharomyces cerevisiae (strain ATCC 204508 / S288c) OX=559292 GN=ALG1 PE=1 SV=1
Unigene0000170	1500	3	170	sp|Q6CVU2|ALG1_KLULA	447	356	411	48.2	56	29	0	56.6	9.4e-07	sp|Q6CVU2|ALG1_KLULA Chitobiosyldiphosphodolichol beta-mannosyltransferase OS=Kluyveromyces lactis (strain ATCC 8585 / CBS 2359 / DSM 70799 / NBRC 1267 / NRRL Y-1140 / WM37) OX=284590 GN=ALG1 PE=3 SV=1
Unigene0000170	1500	3	221	sp|Q6BS98|ALG1_DEBHA	472	372	448	39	77	43	4	55.5	2.1e-06	sp|Q6BS98|ALG1_DEBHA Chitobiosyldiphosphodolichol beta-mannosyltransferase OS=Debaryomyces hansenii (strain ATCC 36239 / CBS 767 / BCRC 21394 / JCM 1990 / NBRC 0083 / IGC 2968) OX=284592 GN=ALG1 PE=3 SV=2
Unigene0000174	1135	389	958	sp|Q5RFV4|R1441_DANRE	293	20	215	31.6	196	128	6	119.8	6.8e-26	sp|Q5RFV4|R1441_DANRE Probable E3 ubiquitin-protein ligase RNF144A-A OS=Danio rerio OX=7955 GN=rnf144aa PE=3 SV=1
Unigene0000174	1135	389	958	sp|P50876|R144A_HUMAN	292	20	214	33.7	196	123	7	118.6	1.5e-25	sp|P50876|R144A_HUMAN E3 ubiquitin-protein ligase RNF144A OS=Homo sapiens OX=9606 GN=RNF144A PE=1 SV=2
Unigene0000174	1135	389	958	sp|Q6DH94|R1442_DANRE	293	20	215	32.1	196	127	6	117.9	2.6e-25	sp|Q6DH94|R1442_DANRE Probable E3 ubiquitin-protein ligase RNF144A-B OS=Danio rerio OX=7955 GN=rnf144ab PE=2 SV=1
Unigene0000174	1135	389	958	sp|Q925F3|R144A_MOUSE	292	20	214	32.7	196	125	7	113.6	4.9e-24	sp|Q925F3|R144A_MOUSE E3 ubiquitin-protein ligase RNF144A OS=Mus musculus OX=10090 GN=Rnf144a PE=1 SV=1
Unigene0000174	1135	389	958	sp|A4IIY1|R144A_XENTR	292	20	214	31.5	200	122	15	111.3	2.4e-23	sp|A4IIY1|R144A_XENTR Probable E3 ubiquitin-protein ligase RNF144A OS=Xenopus tropicalis OX=8364 GN=rnf144a PE=2 SV=1
Unigene0000180	816	38	601	sp|Q7SEK9|RM25_NEUCR	163	12	163	41.6	190	71	40	123.6	3.4e-27	sp|Q7SEK9|RM25_NEUCR Large ribosomal subunit protein mL59 OS=Neurospora crassa (strain ATCC 24698 / 74-OR23-1A / CBS 708.71 / DSM 1257 / FGSC 987) OX=367110 GN=mrpl25 PE=1 SV=1
Unigene0000181	1404	79	588	sp|Q9SMN0|CXE12_ARATH	324	2	175	51.1	176	78	8	186.4	7.4e-46	sp|Q9SMN0|CXE12_ARATH Probable carboxylesterase 12 OS=Arabidopsis thaliana OX=3702 GN=CXE12 PE=1 SV=1
Unigene0000181	1404	852	1298	sp|Q9SMN0|CXE12_ARATH	324	161	319	42.1	159	82	10	126.3	9.1e-28	sp|Q9SMN0|CXE12_ARATH Probable carboxylesterase 12 OS=Arabidopsis thaliana OX=3702 GN=CXE12 PE=1 SV=1
Unigene0000181	1404	85	585	sp|Q5NUF4|HIDM_GLYEC	328	12	185	54	176	70	11	186	9.6e-46	sp|Q5NUF4|HIDM_GLYEC 2-hydroxyisoflavanone dehydratase OS=Glycyrrhiza echinata OX=46348 GN=HIDM PE=1 SV=1
Unigene0000181	1404	897	1298	sp|Q5NUF4|HIDM_GLYEC	328	193	326	38.1	134	83	0	104	4.8e-21	sp|Q5NUF4|HIDM_GLYEC 2-hydroxyisoflavanone dehydratase OS=Glycyrrhiza echinata OX=46348 GN=HIDM PE=1 SV=1
Unigene0000181	1404	88	588	sp|Q9ZQ91|CXE7_ARATH	312	5	172	51.5	171	76	7	180.6	4.0e-44	sp|Q9ZQ91|CXE7_ARATH Probable carboxylesterase 7 OS=Arabidopsis thaliana OX=3702 GN=CXE7 PE=2 SV=1
Unigene0000181	1404	852	1298	sp|Q9ZQ91|CXE7_ARATH	312	158	309	39.4	155	85	9	104	4.8e-21	sp|Q9ZQ91|CXE7_ARATH Probable carboxylesterase 7 OS=Arabidopsis thaliana OX=3702 GN=CXE7 PE=2 SV=1
Unigene0000181	1404	79	588	sp|Q9SMM9|CXE13_ARATH	329	2	178	48	179	82	11	179.9	6.9e-44	sp|Q9SMM9|CXE13_ARATH Probable carboxylesterase 13 OS=Arabidopsis thaliana OX=3702 GN=CXE13 PE=1 SV=1
Unigene0000181	1404	79	588	sp|I4DST8|TCEA1_TULGE	385	80	248	50.9	175	75	11	178.7	1.5e-43	sp|I4DST8|TCEA1_TULGE Tuliposide A-converting enzyme 1, chloroplastic OS=Tulipa gesneriana OX=13306 GN=TCEA1 PE=1 SV=1
Unigene0000181	1404	79	588	sp|I4DST9|TCEA2_TULGE	382	77	245	50.9	175	75	11	178.7	1.5e-43	sp|I4DST9|TCEA2_TULGE Tuliposide A-converting enzyme 2, chloroplastic OS=Tulipa gesneriana OX=13306 GN=TCEA2 PE=1 SV=1
Unigene0000181	1404	106	588	sp|Q9FX92|CXE3_ARATH	315	12	173	50.3	165	75	7	178.3	2.0e-43	sp|Q9FX92|CXE3_ARATH Probable carboxylesterase 3 OS=Arabidopsis thaliana OX=3702 GN=CXE3 PE=2 SV=1
Unigene0000181	1404	852	1298	sp|Q9FX92|CXE3_ARATH	315	159	312	34.2	155	95	7	92.4	1.4e-17	sp|Q9FX92|CXE3_ARATH Probable carboxylesterase 3 OS=Arabidopsis thaliana OX=3702 GN=CXE3 PE=2 SV=1
Unigene0000181	1404	31	588	sp|R4X244|TCAB1_TULGE	374	51	239	46.2	195	90	15	174.1	3.8e-42	sp|R4X244|TCAB1_TULGE Tuliposide A-converting enzyme b1, amyloplastic OS=Tulipa gesneriana OX=13306 GN=TCEA-B1 PE=1 SV=1
Unigene0000181	1404	31	588	sp|R4X4V6|TCAB2_TULGE	374	51	239	46.2	195	90	15	174.1	3.8e-42	sp|R4X4V6|TCAB2_TULGE Tuliposide A-converting enzyme b2, amyloplastic OS=Tulipa gesneriana OX=13306 GN=TCEA-B2 PE=1 SV=1
Unigene0000181	1404	31	588	sp|R4X5P0|TCAB3_TULGE	374	51	239	45.6	195	91	15	172.9	8.4e-42	sp|R4X5P0|TCAB3_TULGE Tuliposide A-converting enzyme b3, amyloplastic OS=Tulipa gesneriana OX=13306 GN=TCEA-B3 PE=1 SV=1
Unigene0000181	1404	37	588	sp|Q9FX93|CXE4_ARATH	374	42	232	45.6	193	94	11	171.4	2.5e-41	sp|Q9FX93|CXE4_ARATH Probable carboxylesterase 4, mitochondrial OS=Arabidopsis thaliana OX=3702 GN=CXE4 PE=1 SV=1
Unigene0000181	1404	852	1298	sp|Q9FX93|CXE4_ARATH	374	218	371	37.4	155	90	7	103.2	8.2e-21	sp|Q9FX93|CXE4_ARATH Probable carboxylesterase 4, mitochondrial OS=Arabidopsis thaliana OX=3702 GN=CXE4 PE=1 SV=1
Unigene0000181	1404	31	588	sp|R4X247|TCAB4_TULGE	374	51	239	45.6	195	91	15	171.4	2.5e-41	sp|R4X247|TCAB4_TULGE Probable tuliposide A-converting enzyme b6, amyloplastic OS=Tulipa gesneriana OX=13306 GN=TCEA-B6 PE=2 SV=1
Unigene0000181	1404	85	588	sp|Q9FX94|CXE5_ARATH	319	4	176	49.1	175	80	9	170.6	4.2e-41	sp|Q9FX94|CXE5_ARATH Probable carboxylesterase 5 OS=Arabidopsis thaliana OX=3702 GN=CXE5 PE=2 SV=1
Unigene0000181	1404	852	1298	sp|Q9FX94|CXE5_ARATH	319	162	316	34.6	156	94	8	95.1	2.2e-18	sp|Q9FX94|CXE5_ARATH Probable carboxylesterase 5 OS=Arabidopsis thaliana OX=3702 GN=CXE5 PE=2 SV=1
Unigene0000181	1404	67	588	sp|Q9SX78|CXE2_ARATH	314	1	171	46.6	174	90	3	168.7	1.6e-40	sp|Q9SX78|CXE2_ARATH Probable carboxylesterase 2 OS=Arabidopsis thaliana OX=3702 GN=CXE2 PE=2 SV=1
Unigene0000181	1404	822	1298	sp|Q9SX78|CXE2_ARATH	314	152	308	42.9	163	83	10	138.3	2.3e-31	sp|Q9SX78|CXE2_ARATH Probable carboxylesterase 2 OS=Arabidopsis thaliana OX=3702 GN=CXE2 PE=2 SV=1
Unigene0000181	1404	79	585	sp|Q9LMA7|CXE1_ARATH	318	2	175	45.5	176	87	9	164.9	2.3e-39	sp|Q9LMA7|CXE1_ARATH Probable carboxylesterase 1 OS=Arabidopsis thaliana OX=3702 GN=CXE1 PE=2 SV=1
Unigene0000181	1404	76	588	sp|A0A2P1GIY2|HL3_CATRO	321	3	185	45.5	187	82	20	162.2	1.5e-38	sp|A0A2P1GIY2|HL3_CATRO Hydrolase 3 OS=Catharanthus roseus OX=4058 GN=HL3 PE=1 SV=1
Unigene0000181	1404	70	588	sp|A0A2P1GIW2|CS_CATRO	330	6	186	44.6	186	85	18	161.4	2.5e-38	sp|A0A2P1GIW2|CS_CATRO Catharanthine synthase OS=Catharanthus roseus OX=4058 GN=CS PE=1 SV=1
Unigene0000181	1404	85	588	sp|Q5NUF3|HIDH_SOYBN	319	4	177	44.9	176	87	10	159.8	7.4e-38	sp|Q5NUF3|HIDH_SOYBN 2-hydroxyisoflavanone dehydratase OS=Glycine max OX=3847 GN=HIDH PE=1 SV=1
Unigene0000181	1404	76	588	sp|A0A2P1GIW3|TS_CATRO	320	3	183	41.6	185	90	18	149.4	1.0e-34	sp|A0A2P1GIW3|TS_CATRO Tabersonine synthase OS=Catharanthus roseus OX=4058 GN=TS PE=1 SV=1
Unigene0000181	1404	100	582	sp|A0A0H5BMX5|TCEB1_TULGE	440	78	243	46.5	170	78	13	146.7	6.5e-34	sp|A0A0H5BMX5|TCEB1_TULGE Tuliposide B-converting enzyme 1, amyloplastic OS=Tulipa gesneriana OX=13306 GN=TCEB1 PE=1 SV=1
Unigene0000189	1012	958	104	sp|P50085|PHB2_YEAST	310	16	298	69.6	286	83	4	370.5	2.0e-101	sp|P50085|PHB2_YEAST Prohibitin-2 OS=Saccharomyces cerevisiae (strain ATCC 204508 / S288c) OX=559292 GN=PHB2 PE=1 SV=2
Unigene0000189	1012	919	122	sp|O94550|PHB2_SCHPO	288	17	281	72.9	266	71	1	363.6	2.4e-99	sp|O94550|PHB2_SCHPO Prohibitin-2 OS=Schizosaccharomyces pombe (strain 972 / ATCC 24843) OX=284812 GN=phb2 PE=1 SV=2
Unigene0000189	1012	937	104	sp|Q54Q31|PHB2_DICDI	293	18	281	60.4	278	96	14	313.9	2.2e-84	sp|Q54Q31|PHB2_DICDI Prohibitin-2 OS=Dictyostelium discoideum OX=44689 GN=phbB PE=3 SV=1
Unigene0000189	1012	886	77	sp|Q9ZNT7|PHB2_ARATH	286	18	285	58.9	270	109	2	313.5	2.9e-84	sp|Q9ZNT7|PHB2_ARATH Prohibitin-2, mitochondrial OS=Arabidopsis thaliana OX=3702 GN=PHB2 PE=1 SV=1
Unigene0000189	1012	907	95	sp|O49460|PHB1_ARATH	288	11	286	57.6	276	112	5	310.5	2.4e-83	sp|O49460|PHB1_ARATH Prohibitin-1, mitochondrial OS=Arabidopsis thaliana OX=3702 GN=PHB1 PE=1 SV=1
Unigene0000189	1012	901	95	sp|Q9SIL6|PHB6_ARATH	286	11	277	57.6	269	112	2	306.6	3.5e-82	sp|Q9SIL6|PHB6_ARATH Prohibitin-6, mitochondrial OS=Arabidopsis thaliana OX=3702 GN=PHB6 PE=1 SV=1
Unigene0000189	1012	907	101	sp|P50093|PHB2_CAEEL	294	18	281	59.9	269	103	5	302.8	5.1e-81	sp|P50093|PHB2_CAEEL Mitochondrial prohibitin complex protein 2 OS=Caenorhabditis elegans OX=6239 GN=phb-2 PE=1 SV=2
Unigene0000189	1012	928	101	sp|A9UMS3|PHB2_XENTR	301	8	282	56.8	278	115	5	292.4	6.9e-78	sp|A9UMS3|PHB2_XENTR Prohibitin-2 OS=Xenopus tropicalis OX=8364 GN=phb2 PE=2 SV=1
Unigene0000189	1012	922	89	sp|Q5XIH7|PHB2_RAT	299	10	286	56.4	280	117	5	291.2	1.5e-77	sp|Q5XIH7|PHB2_RAT Prohibitin-2 OS=Rattus norvegicus OX=10116 GN=Phb2 PE=1 SV=1
Unigene0000189	1012	904	89	sp|Q99623|PHB2_HUMAN	299	15	286	56.6	274	115	4	290.4	2.6e-77	sp|Q99623|PHB2_HUMAN Prohibitin-2 OS=Homo sapiens OX=9606 GN=PHB2 PE=1 SV=2
Unigene0000189	1012	904	89	sp|O35129|PHB2_MOUSE	299	15	286	56.6	274	115	4	290.4	2.6e-77	sp|O35129|PHB2_MOUSE Prohibitin-2 OS=Mus musculus OX=10090 GN=Phb2 PE=1 SV=1
Unigene0000189	1012	922	89	sp|Q2HJ97|PHB2_BOVIN	299	10	286	56.4	280	117	5	289.3	5.8e-77	sp|Q2HJ97|PHB2_BOVIN Prohibitin-2 OS=Bos taurus OX=9913 GN=PHB2 PE=2 SV=1
Unigene0000189	1012	904	89	sp|Q5RB19|PHB2_PONAB	299	15	286	56.2	274	116	4	287.7	1.7e-76	sp|Q5RB19|PHB2_PONAB Prohibitin-2 OS=Pongo abelii OX=9601 GN=PHB2 PE=2 SV=1
Unigene0000189	1012	871	113	sp|Q9FFH5|PHB7_ARATH	278	23	273	58.9	253	102	2	287.7	1.7e-76	sp|Q9FFH5|PHB7_ARATH Prohibitin-7, mitochondrial OS=Arabidopsis thaliana OX=3702 GN=PHB7 PE=1 SV=1
Unigene0000189	1012	904	101	sp|Q5ZMN3|PHB2_CHICK	301	15	282	56.3	270	114	4	283.1	4.2e-75	sp|Q5ZMN3|PHB2_CHICK Prohibitin-2 OS=Gallus gallus OX=9031 GN=PHB2 PE=2 SV=1
Unigene0000189	1012	862	56	sp|Q9P7H3|PHB1_SCHPO	282	16	281	50.7	270	128	5	267.7	1.8e-70	sp|Q9P7H3|PHB1_SCHPO Prohibitin-1 OS=Schizosaccharomyces pombe (strain 972 / ATCC 24843) OX=284812 GN=phb1 PE=3 SV=1
Unigene0000189	1012	886	98	sp|Q54GI9|PHB1_DICDI	271	8	269	52.3	264	123	3	266.2	5.3e-70	sp|Q54GI9|PHB1_DICDI Prohibitin-1, mitochondrial OS=Dictyostelium discoideum OX=44689 GN=phbA PE=3 SV=1
Unigene0000189	1012	835	110	sp|P40961|PHB1_YEAST	287	28	268	54.7	243	107	3	260.8	2.2e-68	sp|P40961|PHB1_YEAST Prohibitin-1 OS=Saccharomyces cerevisiae (strain ATCC 204508 / S288c) OX=559292 GN=PHB1 PE=1 SV=2
Unigene0000189	1012	847	128	sp|P67778|PHB1_MOUSE	272	22	260	55.6	241	104	3	260	3.8e-68	sp|P67778|PHB1_MOUSE Prohibitin 1 OS=Mus musculus OX=10090 GN=Phb1 PE=1 SV=1
Unigene0000189	1012	847	128	sp|P67779|PHB1_RAT	272	22	260	55.6	241	104	3	260	3.8e-68	sp|P67779|PHB1_RAT Prohibitin 1 OS=Rattus norvegicus OX=10116 GN=Phb1 PE=1 SV=1
Unigene0000194	2221	1160	933	sp|Q84R94|TI10A_ORYSJ	228	75	157	48.2	83	36	7	70.1	1.2e-10	sp|Q84R94|TI10A_ORYSJ Protein TIFY 10a OS=Oryza sativa subsp. japonica OX=39947 GN=TIFY10A PE=1 SV=1
Unigene0000194	2221	1160	930	sp|Q8H395|TI10B_ORYSJ	244	97	168	51.9	79	29	9	68.6	3.5e-10	sp|Q8H395|TI10B_ORYSJ Protein TIFY 10b OS=Oryza sativa subsp. japonica OX=39947 GN=TIFY10B PE=1 SV=1
Unigene0000194	2221	2056	1664	sp|Q8H395|TI10B_ORYSJ	244	12	123	34.1	132	66	21	64.7	5.1e-09	sp|Q8H395|TI10B_ORYSJ Protein TIFY 10b OS=Oryza sativa subsp. japonica OX=39947 GN=TIFY10B PE=1 SV=1
Unigene0000194	2221	1160	939	sp|A2YNP2|TI10B_ORYSI	244	97	167	48.6	74	35	3	66.6	1.3e-09	sp|A2YNP2|TI10B_ORYSI Protein TIFY 10b OS=Oryza sativa subsp. indica OX=39946 GN=TIFY10B PE=3 SV=1
Unigene0000194	2221	2056	1664	sp|A2YNP2|TI10B_ORYSI	244	12	123	34.1	132	66	21	63.5	1.1e-08	sp|A2YNP2|TI10B_ORYSI Protein TIFY 10b OS=Oryza sativa subsp. indica OX=39946 GN=TIFY10B PE=3 SV=1
Unigene0000194	2221	1151	912	sp|A2XD79|TI11C_ORYSI	209	96	162	46.9	81	28	15	58.2	4.8e-07	sp|A2XD79|TI11C_ORYSI Protein TIFY 11c OS=Oryza sativa subsp. indica OX=39946 GN=TIFY11C PE=3 SV=1
Unigene0000194	2221	1151	912	sp|Q8GRS2|TI11C_ORYSJ	209	96	162	46.9	81	28	15	58.2	4.8e-07	sp|Q8GRS2|TI11C_ORYSJ Protein TIFY 11c OS=Oryza sativa subsp. japonica OX=39947 GN=TIFY11C PE=1 SV=1
Unigene0000194	2221	2065	1832	sp|A2Z1N3|TI10C_ORYSI	232	10	92	41	83	44	5	56.2	1.8e-06	sp|A2Z1N3|TI10C_ORYSI Protein TIFY 10c OS=Oryza sativa subsp. indica OX=39946 GN=TIFY10C PE=3 SV=1
Unigene0000194	2221	1142	972	sp|A2Z1N3|TI10C_ORYSI	232	120	177	48.3	58	29	1	54.3	6.9e-06	sp|A2Z1N3|TI10C_ORYSI Protein TIFY 10c OS=Oryza sativa subsp. indica OX=39946 GN=TIFY10C PE=3 SV=1
Unigene0000194	2221	2065	1832	sp|Q69P94|TI10C_ORYSJ	232	10	92	39.8	83	45	5	54.7	5.3e-06	sp|Q69P94|TI10C_ORYSJ Protein TIFY 10c OS=Oryza sativa subsp. japonica OX=39947 GN=TIFY10C PE=1 SV=1
Unigene0000194	2221	1142	972	sp|Q69P94|TI10C_ORYSJ	232	120	177	48.3	58	29	1	54.3	6.9e-06	sp|Q69P94|TI10C_ORYSJ Protein TIFY 10c OS=Oryza sativa subsp. japonica OX=39947 GN=TIFY10C PE=1 SV=1
Unigene0000205	2401	2295	34	sp|Q5AW25|AGDD_EMENI	780	1	778	72.4	779	189	26	1191.8	0.0e+00	sp|Q5AW25|AGDD_EMENI Alpha-xylosidase OS=Emericella nidulans (strain FGSC A4 / ATCC 38163 / CBS 112.46 / NRRL 194 / M139) OX=227321 GN=agdD PE=1 SV=1
Unigene0000205	2401	2295	193	sp|P31434|XYLS_ECOLI	772	1	679	48.4	704	335	28	711.4	1.1e-203	sp|P31434|XYLS_ECOLI Alpha-xylosidase OS=Escherichia coli (strain K12) OX=83333 GN=yicI PE=1 SV=2
Unigene0000205	2401	2295	214	sp|P96793|XYLQ_LACPE	762	1	677	45.9	704	344	37	621.7	1.2e-176	sp|P96793|XYLQ_LACPE Alpha-xylosidase XylQ OS=Lactiplantibacillus pentosus OX=1589 GN=xylQ PE=1 SV=1
Unigene0000205	2401	1968	214	sp|Q8RQV0|CTSY_SPOGL	1093	220	835	27.6	642	382	83	240.4	7.4e-62	sp|Q8RQV0|CTSY_SPOGL Isomaltosyltransferase OS=Sporosarcina globispora OX=1459 GN=ctsY PE=1 SV=1
Unigene0000205	2401	1545	205	sp|Q8BVW0|GANC_MOUSE	898	315	769	28.1	474	295	46	192.2	2.3e-47	sp|Q8BVW0|GANC_MOUSE Neutral alpha-glucosidase C OS=Mus musculus OX=10090 GN=Ganc PE=1 SV=2
Unigene0000205	2401	1863	205	sp|Q9BE70|GANC_MACFA	769	85	640	25.9	587	370	65	189.1	1.9e-46	sp|Q9BE70|GANC_MACFA Neutral alpha-glucosidase C (Fragment) OS=Macaca fascicularis OX=9541 GN=GANC PE=2 SV=2
Unigene0000205	2401	1614	205	sp|Q8TET4|GANC_HUMAN	914	308	785	27.1	498	315	48	188.7	2.5e-46	sp|Q8TET4|GANC_HUMAN Neutral alpha-glucosidase C OS=Homo sapiens OX=9606 GN=GANC PE=1 SV=3
Unigene0000205	2401	1545	220	sp|Q14697|GANAB_HUMAN	944	362	802	28.3	460	293	37	178.7	2.6e-43	sp|Q14697|GANAB_HUMAN Neutral alpha-glucosidase AB OS=Homo sapiens OX=9606 GN=GANAB PE=1 SV=3
Unigene0000205	2401	1545	220	sp|Q4R4N7|GANAB_MACFA	944	362	802	28	460	294	37	178.3	3.4e-43	sp|Q4R4N7|GANAB_MACFA Neutral alpha-glucosidase AB OS=Macaca fascicularis OX=9541 GN=GANAB PE=2 SV=1
Unigene0000205	2401	1545	220	sp|Q8BHN3|GANAB_MOUSE	944	362	802	27.5	461	295	39	175.6	2.2e-42	sp|Q8BHN3|GANAB_MOUSE Neutral alpha-glucosidase AB OS=Mus musculus OX=10090 GN=Ganab PE=1 SV=1
Unigene0000205	2401	1545	313	sp|Q9FN05|PSL5_ARATH	921	332	747	28	432	274	37	175.3	2.9e-42	sp|Q9FN05|PSL5_ARATH Probable glucan 1,3-alpha-glucosidase OS=Arabidopsis thaliana OX=3702 GN=PSL5 PE=1 SV=1
Unigene0000205	2401	1545	358	sp|B9F676|GLU2A_ORYSJ	919	330	738	27.5	418	272	31	172.9	1.4e-41	sp|B9F676|GLU2A_ORYSJ Probable glucan 1,3-alpha-glucosidase OS=Oryza sativa subsp. japonica OX=39947 GN=Os03g0216600 PE=3 SV=1
Unigene0000205	2401	1776	325	sp|A9CEZ0|SQASE_AGRFC	664	110	620	25.1	534	327	73	172.6	1.9e-41	sp|A9CEZ0|SQASE_AGRFC Sulfoquinovosidase OS=Agrobacterium fabrum (strain C58 / ATCC 33970) OX=176299 GN=smoI PE=1 SV=1
Unigene0000205	2401	1545	220	sp|P79403|GANAB_PIG	944	362	802	26.8	463	296	43	167.9	4.6e-40	sp|P79403|GANAB_PIG Neutral alpha-glucosidase AB OS=Sus scrofa OX=9823 GN=GANAB PE=1 SV=1
Unigene0000205	2401	1770	358	sp|P14410|SUIS_HUMAN	1827	238	758	22.3	528	346	64	141.7	3.6e-32	sp|P14410|SUIS_HUMAN Sucrase-isomaltase, intestinal OS=Homo sapiens OX=9606 GN=SI PE=1 SV=6
Unigene0000205	2401	1776	310	sp|P23739|SUIS_RAT	1841	246	771	22.1	547	347	79	131.3	4.8e-29	sp|P23739|SUIS_RAT Sucrase-isomaltase, intestinal OS=Rattus norvegicus OX=10116 GN=Si PE=1 SV=5
Unigene0000205	2401	1689	319	sp|Q6NSJ0|MYORG_HUMAN	714	216	685	26.1	498	299	69	126.7	1.2e-27	sp|Q6NSJ0|MYORG_HUMAN Myogenesis-regulating glycosidase OS=Homo sapiens OX=9606 GN=MYORG PE=1 SV=2
Unigene0000205	2401	1689	319	sp|Q69ZQ1|MYORG_MOUSE	716	215	687	25.3	498	306	66	126.3	1.5e-27	sp|Q69ZQ1|MYORG_MOUSE Myogenesis-regulating glycosidase OS=Mus musculus OX=10090 GN=Myorg PE=1 SV=2
Unigene0000205	2401	945	310	sp|Q09901|YAJ1_SCHPO	993	626	836	29.4	214	146	5	108.6	3.3e-22	sp|Q09901|YAJ1_SCHPO Uncharacterized family 31 glucosidase C30D11.01c OS=Schizosaccharomyces pombe (strain 972 / ATCC 24843) OX=284812 GN=SPAC30D11.01c PE=3 SV=2
Unigene0000205	2401	1008	310	sp|Q9C0Y4|AGLU_SCHPO	969	580	811	28.3	237	161	9	106.3	1.7e-21	sp|Q9C0Y4|AGLU_SCHPO Alpha-glucosidase OS=Schizosaccharomyces pombe (strain 972 / ATCC 24843) OX=284812 GN=agl1 PE=1 SV=2
Unigene0000207	583	496	149	sp|Q4HZB8|FKBP_GIBZE	111	1	110	64.7	116	35	6	157.1	2.0e-37	sp|Q4HZB8|FKBP_GIBZE FK506-binding protein 1 OS=Gibberella zeae (strain ATCC MYA-4620 / CBS 123657 / FGSC 9075 / NRRL 31084 / PH-1) OX=229533 GN=FPR1 PE=3 SV=2
Unigene0000207	583	496	146	sp|Q4WLV6|FKB1A_ASPFU	112	1	108	63	119	31	13	141.4	1.1e-32	sp|Q4WLV6|FKB1A_ASPFU FK506-binding protein 1A OS=Aspergillus fumigatus (strain ATCC MYA-4609 / CBS 101355 / FGSC A1100 / Af293) OX=330879 GN=fpr1A PE=1 SV=1
Unigene0000207	583	496	146	sp|O42993|FKBP_SCHPO	112	1	108	60.5	119	34	13	138.3	9.5e-32	sp|O42993|FKBP_SCHPO Peptidyl-prolyl cis-trans isomerase OS=Schizosaccharomyces pombe (strain 972 / ATCC 24843) OX=284812 GN=fkh1 PE=3 SV=1
Unigene0000207	583	496	146	sp|P0C1J3|FKBP1_RHIO9	108	1	108	61.3	119	33	13	137.9	1.2e-31	sp|P0C1J3|FKBP1_RHIO9 FK506-binding protein 1 OS=Rhizopus delemar (strain RA 99-880 / ATCC MYA-4621 / FGSC 9543 / NRRL 43880) OX=246409 GN=FKBP1 PE=3 SV=1
Unigene0000207	583	496	146	sp|Q6KBA8|FKB1A_EMENI	108	1	108	61.3	119	33	13	136.7	2.8e-31	sp|Q6KBA8|FKB1A_EMENI FK506-binding protein 1A OS=Emericella nidulans (strain FGSC A4 / ATCC 38163 / CBS 112.46 / NRRL 194 / M139) OX=227321 GN=fprA PE=3 SV=1
Unigene0000207	583	496	155	sp|Q6M981|FKB1B_NEUCR	113	1	110	57.9	114	44	4	136	4.7e-31	sp|Q6M981|FKB1B_NEUCR FK506-binding protein 1B OS=Neurospora crassa (strain ATCC 24698 / 74-OR23-1A / CBS 708.71 / DSM 1257 / FGSC 987) OX=367110 GN=fkr-3 PE=3 SV=2
Unigene0000207	583	496	146	sp|P0CP95|FKBP_CRYNB	108	1	108	59.7	119	35	13	135.2	8.1e-31	sp|P0CP95|FKBP_CRYNB FK506-binding protein 1 OS=Cryptococcus neoformans var. neoformans serotype D (strain B-3501A) OX=283643 GN=FPR1 PE=3 SV=1
Unigene0000207	583	496	146	sp|P0CP94|FKBP_CRYNJ	108	1	108	59.7	119	35	13	135.2	8.1e-31	sp|P0CP94|FKBP_CRYNJ FK506-binding protein 1 OS=Cryptococcus neoformans var. neoformans serotype D (strain JEC21 / ATCC MYA-565) OX=214684 GN=FPR1 PE=3 SV=1
Unigene0000207	583	496	146	sp|O94746|FKBP_CRYNH	108	1	108	58.8	119	36	13	134	1.8e-30	sp|O94746|FKBP_CRYNH FK506-binding protein 1 OS=Cryptococcus neoformans var. grubii serotype A (strain H99 / ATCC 208821 / CBS 10515 / FGSC 9487) OX=235443 GN=FRR1 PE=1 SV=1
Unigene0000207	583	496	146	sp|Q2U316|FKBP_ASPOR	116	1	116	57.1	119	46	5	131.3	1.2e-29	sp|Q2U316|FKBP_ASPOR FK506-binding protein 1 OS=Aspergillus oryzae (strain ATCC 42149 / RIB 40) OX=510516 GN=fpr1 PE=3 SV=1
Unigene0000207	583	496	149	sp|Q4W9R2|FKB1B_ASPFU	120	1	114	53	117	51	4	125.2	8.4e-28	sp|Q4W9R2|FKB1B_ASPFU FK506-binding protein 1B OS=Aspergillus fumigatus (strain ATCC MYA-4609 / CBS 101355 / FGSC A1100 / Af293) OX=330879 GN=fpr1B PE=3 SV=1
Unigene0000207	583	475	146	sp|P20081|FKBP_YEAST	114	14	114	56.2	112	36	13	119	6.0e-26	sp|P20081|FKBP_YEAST FK506-binding protein 1 OS=Saccharomyces cerevisiae (strain ATCC 204508 / S288c) OX=559292 GN=FPR1 PE=1 SV=2
Unigene0000207	583	493	146	sp|Q6FMA3|FKBP_CANGA	114	8	114	54.2	118	41	13	118.2	1.0e-25	sp|Q6FMA3|FKBP_CANGA FK506-binding protein 1 OS=Candida glabrata (strain ATCC 2001 / BCRC 20586 / JCM 3761 / NBRC 0622 / NRRL Y-65 / CBS 138) OX=284593 GN=FPR1 PE=1 SV=1
Unigene0000207	583	496	146	sp|Q6CF41|FKBP_YARLI	108	1	108	52.9	119	43	13	117.5	1.7e-25	sp|Q6CF41|FKBP_YARLI FK506-binding protein 1 OS=Yarrowia lipolytica (strain CLIB 122 / E 150) OX=284591 GN=FPR1 PE=3 SV=1
Unigene0000207	583	451	146	sp|Q6CX30|FKBP_KLULA	114	23	114	58.3	103	31	12	117.1	2.3e-25	sp|Q6CX30|FKBP_KLULA FK506-binding protein 1 OS=Kluyveromyces lactis (strain ATCC 8585 / CBS 2359 / DSM 70799 / NBRC 1267 / NRRL Y-1140 / WM37) OX=284590 GN=FPR1 PE=3 SV=1
Unigene0000207	583	505	164	sp|P0CY37|FKB1B_EMENI	120	2	115	53.9	115	51	2	116.3	3.9e-25	sp|P0CY37|FKB1B_EMENI FK506-binding protein 1B OS=Emericella nidulans (strain FGSC A4 / ATCC 38163 / CBS 112.46 / NRRL 194 / M139) OX=227321 GN=FKBP3 PE=3 SV=1
Unigene0000207	583	475	146	sp|Q754K8|FKBP_EREGS	114	14	114	54.5	112	38	13	111.7	9.6e-24	sp|Q754K8|FKBP_EREGS FK506-binding protein 1 OS=Eremothecium gossypii (strain ATCC 10895 / CBS 109.51 / FGSC 9923 / NRRL Y-1056) OX=284811 GN=FPR1 PE=3 SV=1
Unigene0000207	583	496	158	sp|Q554J3|FKBP1_DICDI	107	1	103	50.9	114	44	12	110.9	1.6e-23	sp|Q554J3|FKBP1_DICDI FK506-binding protein 1 OS=Dictyostelium discoideum OX=44689 GN=fkbp1 PE=3 SV=1
Unigene0000207	583	496	149	sp|P48375|FKB12_DROME	108	1	107	51.7	118	44	13	110.5	2.1e-23	sp|P48375|FKB12_DROME Peptidyl-prolyl cis-trans isomerase Fkbp12 OS=Drosophila melanogaster OX=7227 GN=Fkbp12 PE=3 SV=2
Unigene0000207	583	496	149	sp|P18203|FKB1A_BOVIN	108	1	107	47.5	118	49	13	108.6	8.1e-23	sp|P18203|FKB1A_BOVIN Peptidyl-prolyl cis-trans isomerase FKBP1A OS=Bos taurus OX=9913 GN=FKBP1A PE=1 SV=2
Unigene0000209	1986	1828	62	sp|Q944C1|PLCD4_ARATH	597	4	597	59.5	600	226	17	711.1	1.2e-203	sp|Q944C1|PLCD4_ARATH Phosphoinositide phospholipase C 4 OS=Arabidopsis thaliana OX=3702 GN=PLC4 PE=2 SV=2
Unigene0000209	1986	1816	65	sp|Q8GV43|PLCD6_ARATH	613	15	612	57.6	606	227	30	696.4	3.1e-199	sp|Q8GV43|PLCD6_ARATH Phosphoinositide phospholipase C 6 OS=Arabidopsis thaliana OX=3702 GN=PLC6 PE=2 SV=2
Unigene0000209	1986	1813	62	sp|Q39033|PLCD2_ARATH	581	5	581	57.9	592	226	23	684.1	1.6e-195	sp|Q39033|PLCD2_ARATH Phosphoinositide phospholipase C 2 OS=Arabidopsis thaliana OX=3702 GN=PLC2 PE=1 SV=1
Unigene0000209	1986	1813	62	sp|Q9LY51|PLCD7_ARATH	584	5	584	55.6	597	235	30	654.8	1.0e-186	sp|Q9LY51|PLCD7_ARATH Phosphoinositide phospholipase C 7 OS=Arabidopsis thaliana OX=3702 GN=PLC7 PE=1 SV=1
Unigene0000209	1986	1819	62	sp|Q944C2|PLCD5_ARATH	578	5	578	53	594	251	28	620.2	2.8e-176	sp|Q944C2|PLCD5_ARATH Phosphoinositide phospholipase C 5 OS=Arabidopsis thaliana OX=3702 GN=PLC5 PE=2 SV=2
Unigene0000209	1986	1786	71	sp|Q39032|PLCD1_ARATH	561	13	556	49.4	575	257	34	557.4	2.2e-157	sp|Q39032|PLCD1_ARATH Phosphoinositide phospholipase C 1 OS=Arabidopsis thaliana OX=3702 GN=PLC1 PE=2 SV=1
Unigene0000209	1986	1813	68	sp|Q56W08|PLCD3_ARATH	564	4	556	47.1	584	276	33	523.1	4.7e-147	sp|Q56W08|PLCD3_ARATH Phosphoinositide phospholipase C 3 OS=Arabidopsis thaliana OX=3702 GN=PLC3 PE=2 SV=1
Unigene0000209	1986	1558	65	sp|Q9STZ3|PLCD8_ARATH	531	83	530	42.7	499	234	52	397.5	3.0e-109	sp|Q9STZ3|PLCD8_ARATH Phosphoinositide phospholipase C 8 OS=Arabidopsis thaliana OX=3702 GN=PLC8 PE=2 SV=1
Unigene0000209	1986	1789	65	sp|Q6NMA7|PLCD9_ARATH	531	5	530	39	582	292	63	373.6	4.6e-102	sp|Q6NMA7|PLCD9_ARATH Phosphoinositide phospholipase C 9 OS=Arabidopsis thaliana OX=3702 GN=PLC9 PE=2 SV=1
Unigene0000209	1986	1543	62	sp|A5D6R3|PLD3A_DANRE	784	295	768	34.3	504	291	40	246.9	6.5e-64	sp|A5D6R3|PLD3A_DANRE 1-phosphatidylinositol 4,5-bisphosphate phosphodiesterase delta-3-A OS=Danio rerio OX=7955 GN=plcd3a PE=2 SV=1
Unigene0000209	1986	1735	74	sp|Q2VRL0|PLCZ1_CHICK	637	79	633	28.9	577	365	45	223.8	5.9e-57	sp|Q2VRL0|PLCZ1_CHICK 1-phosphatidylinositol 4,5-bisphosphate phosphodiesterase zeta-1 OS=Gallus gallus OX=9031 GN=PLCZ1 PE=2 SV=1
Unigene0000209	1986	1501	68	sp|P51178|PLCD1_HUMAN	756	293	753	31.1	495	290	51	221.9	2.2e-56	sp|P51178|PLCD1_HUMAN 1-phosphatidylinositol 4,5-bisphosphate phosphodiesterase delta-1 OS=Homo sapiens OX=9606 GN=PLCD1 PE=1 SV=2
Unigene0000209	1986	1498	74	sp|Q8K2J0|PLCD3_MOUSE	785	331	779	30.5	479	299	34	221.1	3.8e-56	sp|Q8K2J0|PLCD3_MOUSE 1-phosphatidylinositol 4,5-bisphosphate phosphodiesterase delta-3 OS=Mus musculus OX=10090 GN=Plcd3 PE=1 SV=2
Unigene0000209	1986	1501	107	sp|P10895|PLCD1_BOVIN	756	293	740	31.2	480	283	47	213	1.0e-53	sp|P10895|PLCD1_BOVIN 1-phosphatidylinositol 4,5-bisphosphate phosphodiesterase delta-1 OS=Bos taurus OX=9913 GN=PLCD1 PE=2 SV=2
Unigene0000209	1986	1615	62	sp|Q02158|PLC_DICDI	801	278	800	29.1	547	335	53	211.1	4.0e-53	sp|Q02158|PLC_DICDI 1-phosphatidylinositol 4,5-bisphosphate phosphodiesterase OS=Dictyostelium discoideum OX=44689 GN=plc PE=2 SV=1
Unigene0000209	1986	1621	74	sp|Q62711|PLCD4_RAT	772	247	760	29.5	528	346	26	209.5	1.2e-52	sp|Q62711|PLCD4_RAT 1-phosphatidylinositol 4,5-bisphosphate phosphodiesterase delta-4 OS=Rattus norvegicus OX=10116 GN=Plcd4 PE=1 SV=1
Unigene0000209	1986	1708	113	sp|Q15147|PLCB4_HUMAN	1175	236	804	29.3	588	341	75	205.7	1.7e-51	sp|Q15147|PLCB4_HUMAN 1-phosphatidylinositol 4,5-bisphosphate phosphodiesterase beta-4 OS=Homo sapiens OX=9606 GN=PLCB4 PE=1 SV=3
Unigene0000209	1986	1708	113	sp|Q07722|PLCB4_BOVIN	1023	72	652	29.2	600	338	87	203.4	8.2e-51	sp|Q07722|PLCB4_BOVIN 1-phosphatidylinositol 4,5-bisphosphate phosphodiesterase beta-4 (Fragment) OS=Bos taurus OX=9913 GN=PLCB4 PE=1 SV=1
Unigene0000209	1986	1708	113	sp|Q9QW07|PLCB4_RAT	1175	236	804	28.4	592	341	83	203	1.1e-50	sp|Q9QW07|PLCB4_RAT 1-phosphatidylinositol 4,5-bisphosphate phosphodiesterase beta-4 OS=Rattus norvegicus OX=10116 GN=Plcb4 PE=1 SV=2
Unigene0000209	1986	1498	74	sp|Q8K3R3|PLCD4_MOUSE	807	288	795	29.3	516	316	49	202.6	1.4e-50	sp|Q8K3R3|PLCD4_MOUSE 1-phosphatidylinositol 4,5-bisphosphate phosphodiesterase delta-4 OS=Mus musculus OX=10090 GN=Plcd4 PE=1 SV=2
Unigene0000210	345	345	1	sp|Q0CS88|TAZB_ASPTN	2620	1111	1225	54.8	115	52	0	148.3	5.5e-35	sp|Q0CS88|TAZB_ASPTN Highly reducing polyketide synthase tazB OS=Aspergillus terreus (strain NIH 2624 / FGSC A1156) OX=341663 GN=tazB PE=2 SV=1
Unigene0000210	345	345	1	sp|G4NEB1|NEC1_PYRO7	2758	1238	1351	28.7	115	81	1	68.9	4.2e-11	sp|G4NEB1|NEC1_PYRO7 Highly reducing polyketide synthase NEC1 OS=Pyricularia oryzae (strain 70-15 / ATCC MYA-4617 / FGSC 8958) OX=242507 GN=NEC1 PE=1 SV=1
Unigene0000215	569	567	340	sp|Q8L7F7|NUP62_ARATH	739	664	739	56.6	76	33	0	92.8	4.5e-18	sp|Q8L7F7|NUP62_ARATH Nuclear pore complex protein NUP62 OS=Arabidopsis thaliana OX=3702 GN=NUP62 PE=1 SV=1
Unigene0000216	423	421	290	sp|Q8L7F7|NUP62_ARATH	739	696	739	54.5	44	20	0	56.6	2.7e-07	sp|Q8L7F7|NUP62_ARATH Nuclear pore complex protein NUP62 OS=Arabidopsis thaliana OX=3702 GN=NUP62 PE=1 SV=1
Unigene0000218	1274	1245	499	sp|Q09100|RNP24_SCHPO	369	10	279	34.9	272	152	25	152.9	8.2e-36	sp|Q09100|RNP24_SCHPO RNA-binding protein rnp24 OS=Schizosaccharomyces pombe (strain 972 / ATCC 24843) OX=284812 GN=rnp24 PE=4 SV=2
Unigene0000218	1274	1221	475	sp|P53883|NOP13_YEAST	403	29	298	33.3	279	147	39	146.7	5.9e-34	sp|P53883|NOP13_YEAST Nucleolar protein 13 OS=Saccharomyces cerevisiae (strain ATCC 204508 / S288c) OX=559292 GN=NOP13 PE=1 SV=2
Unigene0000218	1274	984	502	sp|P48810|RB87F_DROME	385	26	165	26.7	161	97	21	55.8	1.4e-06	sp|P48810|RB87F_DROME Heterogeneous nuclear ribonucleoprotein 87F OS=Drosophila melanogaster OX=7227 GN=Hrb87F PE=2 SV=2
Unigene0000218	1274	648	475	sp|Q9WX37|RBPE_NOSS1	99	3	60	41.4	58	34	0	55.8	1.4e-06	sp|Q9WX37|RBPE_NOSS1 Putative RNA-binding protein RbpE OS=Nostoc sp. (strain PCC 7120 / SAG 25.82 / UTEX 2576) OX=103690 GN=rbpE PE=3 SV=3
Unigene0000218	1274	984	478	sp|P07909|ROA1_DROME	365	33	180	24.3	169	107	21	54.7	3.0e-06	sp|P07909|ROA1_DROME Heterogeneous nuclear ribonucleoprotein A1 OS=Drosophila melanogaster OX=7227 GN=Hrb98DE PE=2 SV=1
Unigene0000218	1274	681	475	sp|P25299|RNA15_YEAST	296	9	77	36.2	69	44	0	53.5	6.8e-06	sp|P25299|RNA15_YEAST mRNA 3'-end-processing protein RNA15 OS=Saccharomyces cerevisiae (strain ATCC 204508 / S288c) OX=559292 GN=RNA15 PE=1 SV=1
Unigene0000223	960	118	471	sp|Q11118|WOS2_SCHPO	186	5	121	52.5	118	55	1	124.8	1.8e-27	sp|Q11118|WOS2_SCHPO Protein wos2 OS=Schizosaccharomyces pombe (strain 972 / ATCC 24843) OX=284812 GN=wos2 PE=2 SV=1
Unigene0000223	960	127	471	sp|P28707|SBA1_YEAST	216	8	128	39.8	123	64	10	88.6	1.4e-16	sp|P28707|SBA1_YEAST Co-chaperone protein SBA1 OS=Saccharomyces cerevisiae (strain ATCC 204508 / S288c) OX=559292 GN=SBA1 PE=1 SV=3
Unigene0000223	960	127	471	sp|Q23280|DAF41_CAEEL	175	5	109	41.4	116	56	12	75.5	1.3e-12	sp|Q23280|DAF41_CAEEL Co-chaperone protein daf-41 OS=Caenorhabditis elegans OX=6239 GN=daf-41 PE=2 SV=1
Unigene0000223	960	127	471	sp|Q8L7U4|P23A_ARATH	241	5	111	32.8	116	68	10	60.8	3.2e-08	sp|Q8L7U4|P23A_ARATH Co-chaperone protein p23-1 OS=Arabidopsis thaliana OX=3702 GN=P23-1 PE=1 SV=1
Unigene0000223	960	127	471	sp|P0C8Z0|Y8359_ORYSI	210	5	112	31.6	117	69	11	60.5	4.2e-08	sp|P0C8Z0|Y8359_ORYSI Uncharacterized protein OsI_027940 OS=Oryza sativa subsp. indica OX=39946 GN=OsI_027940 PE=1 SV=2
Unigene0000223	960	127	471	sp|Q6YYB0|Y8359_ORYSJ	213	5	112	31.6	117	69	11	60.5	4.2e-08	sp|Q6YYB0|Y8359_ORYSJ Uncharacterized protein Os08g0359500 OS=Oryza sativa subsp. japonica OX=39947 GN=Os08g0359500 PE=2 SV=1
Unigene0000233	771	95	370	sp|Q9FY78|LTG29_ARATH	158	16	106	38	92	56	1	75.1	1.3e-12	sp|Q9FY78|LTG29_ARATH Non-specific lipid transfer protein GPI-anchored 29 OS=Arabidopsis thaliana OX=3702 GN=LTPG29 PE=2 SV=1
Unigene0000235	473	97	315	sp|Q9M2Y0|PSK3_ARATH	79	1	77	41.6	77	41	4	68.6	7.5e-11	sp|Q9M2Y0|PSK3_ARATH Phytosulfokines 3 OS=Arabidopsis thaliana OX=3702 GN=PSK3 PE=2 SV=2
Unigene0000235	473	100	318	sp|Q9FS10|PSK_ASPOF	75	3	74	45.2	73	39	1	63.9	1.9e-09	sp|Q9FS10|PSK_ASPOF Phytosulfokines OS=Asparagus officinalis OX=4686 GN=PSK PE=1 SV=1
Unigene0000240	605	417	244	sp|Q7Y0B9|SAPK8_ORYSJ	371	12	69	79.3	58	12	0	103.2	3.5e-21	sp|Q7Y0B9|SAPK8_ORYSJ Serine/threonine-protein kinase SAPK8 OS=Oryza sativa subsp. japonica OX=39947 GN=SAPK8 PE=1 SV=1
Unigene0000240	605	420	244	sp|Q75H77|SAPKA_ORYSJ	362	1	59	72.9	59	16	0	97.4	1.9e-19	sp|Q75H77|SAPKA_ORYSJ Serine/threonine-protein kinase SAPK10 OS=Oryza sativa subsp. japonica OX=39947 GN=SAPK10 PE=1 SV=1
Unigene0000240	605	420	244	sp|Q940H6|SRK2E_ARATH	362	1	57	83.1	59	8	2	97.4	1.9e-19	sp|Q940H6|SRK2E_ARATH Serine/threonine-protein kinase SRK2E OS=Arabidopsis thaliana OX=3702 GN=SRK2E PE=1 SV=1
Unigene0000240	605	420	244	sp|Q39193|SRK2I_ARATH	361	1	58	72.9	59	15	1	94	2.1e-18	sp|Q39193|SRK2I_ARATH Serine/threonine-protein kinase SRK2I OS=Arabidopsis thaliana OX=3702 GN=SRK2I PE=1 SV=1
Unigene0000240	605	387	244	sp|A9TF79|SRK2A_PHYPA	349	1	48	77.1	48	11	0	84.7	1.3e-15	sp|A9TF79|SRK2A_PHYPA Serine/threonine-protein kinase SRK2A OS=Physcomitrium patens OX=3218 GN=SRK2A PE=1 SV=1
Unigene0000240	605	387	244	sp|Q39192|SRK2D_ARATH	362	12	59	77.1	48	11	0	84.3	1.7e-15	sp|Q39192|SRK2D_ARATH Serine/threonine-protein kinase SRK2D OS=Arabidopsis thaliana OX=3702 GN=SRK2D PE=1 SV=1
Unigene0000240	605	420	244	sp|Q75V57|SAPK9_ORYSJ	361	1	58	63.3	60	19	3	79.7	4.2e-14	sp|Q75V57|SAPK9_ORYSJ Serine/threonine-protein kinase SAPK9 OS=Oryza sativa subsp. japonica OX=39947 GN=SAPK9 PE=1 SV=1
Unigene0000240	605	360	244	sp|A2ZAB5|SAPK3_ORYSI	334	3	41	71.8	39	11	0	66.2	4.8e-10	sp|A2ZAB5|SAPK3_ORYSI Serine/threonine-protein kinase SAPK3 OS=Oryza sativa subsp. indica OX=39946 GN=SAPK3 PE=1 SV=2
Unigene0000240	605	360	244	sp|P0C5D6|SAPK3_ORYSJ	334	3	41	71.8	39	11	0	66.2	4.8e-10	sp|P0C5D6|SAPK3_ORYSJ Serine/threonine-protein kinase SAPK3 OS=Oryza sativa subsp. japonica OX=39947 GN=SAPK3 PE=1 SV=1
Unigene0000240	605	360	244	sp|P43291|SRK2A_ARATH	363	2	40	76.9	39	9	0	65.5	8.1e-10	sp|P43291|SRK2A_ARATH Serine/threonine-protein kinase SRK2A OS=Arabidopsis thaliana OX=3702 GN=SRK2A PE=1 SV=1
Unigene0000240	605	360	244	sp|Q9C958|SRK2B_ARATH	361	2	40	76.9	39	9	0	65.5	8.1e-10	sp|Q9C958|SRK2B_ARATH Serine/threonine-protein kinase SRK2B OS=Arabidopsis thaliana OX=3702 GN=SRK2B PE=1 SV=1
Unigene0000240	605	360	244	sp|Q9FFP9|SRK2H_ARATH	360	2	40	69.2	39	12	0	64.7	1.4e-09	sp|Q9FFP9|SRK2H_ARATH Serine/threonine-protein kinase SRK2H OS=Arabidopsis thaliana OX=3702 GN=SRK2H PE=1 SV=1
Unigene0000240	605	360	244	sp|Q9M9E9|SRK2C_ARATH	343	2	40	69.2	39	12	0	63.9	2.4e-09	sp|Q9M9E9|SRK2C_ARATH Serine/threonine-protein kinase SRK2C OS=Arabidopsis thaliana OX=3702 GN=SRK2C PE=1 SV=1
Unigene0000240	605	360	244	sp|P43292|SRK2G_ARATH	353	2	40	66.7	39	13	0	62.8	5.3e-09	sp|P43292|SRK2G_ARATH Serine/threonine-protein kinase SRK2G OS=Arabidopsis thaliana OX=3702 GN=SRK2G PE=1 SV=2
Unigene0000240	605	360	244	sp|Q7XQP4|SAPK7_ORYSJ	359	2	40	69.2	39	12	0	62	9.0e-09	sp|Q7XQP4|SAPK7_ORYSJ Serine/threonine-protein kinase SAPK7 OS=Oryza sativa subsp. japonica OX=39947 GN=SAPK7 PE=2 SV=2
Unigene0000240	605	360	244	sp|A2YNT8|SAPK2_ORYSI	339	2	40	61.5	39	15	0	60.8	2.0e-08	sp|A2YNT8|SAPK2_ORYSI Serine/threonine-protein kinase SAPK2 OS=Oryza sativa subsp. indica OX=39946 GN=SAPK2 PE=2 SV=2
Unigene0000240	605	360	244	sp|Q0D4J7|SAPK2_ORYSJ	339	2	40	61.5	39	15	0	60.8	2.0e-08	sp|Q0D4J7|SAPK2_ORYSJ Serine/threonine-protein kinase SAPK2 OS=Oryza sativa subsp. japonica OX=39947 GN=SAPK2 PE=1 SV=1
Unigene0000240	605	360	244	sp|Q6ZI44|SAPK6_ORYSJ	365	2	40	61.5	39	15	0	58.5	1.0e-07	sp|Q6ZI44|SAPK6_ORYSJ Serine/threonine-protein kinase SAPK6 OS=Oryza sativa subsp. japonica OX=39947 GN=SAPK6 PE=1 SV=1
Unigene0000240	605	360	244	sp|O64812|SRK2J_ARATH	339	2	40	61.5	39	15	0	58.2	1.3e-07	sp|O64812|SRK2J_ARATH Serine/threonine-protein kinase SRK2J OS=Arabidopsis thaliana OX=3702 GN=SRK2J PE=1 SV=1
Unigene0000240	605	360	244	sp|Q5N942|SAPK4_ORYSJ	360	2	40	61.5	39	15	0	57.8	1.7e-07	sp|Q5N942|SAPK4_ORYSJ Serine/threonine-protein kinase SAPK4 OS=Oryza sativa subsp. japonica OX=39947 GN=SAPK4 PE=2 SV=2
Unigene0000242	906	647	429	sp|Q6UNT2|RL5_CUCSA	302	25	97	76.7	73	17	0	114.8	1.8e-24	sp|Q6UNT2|RL5_CUCSA Large ribosomal subunit protein uL18 OS=Cucumis sativus OX=3659 GN=RPL5 PE=2 SV=1
Unigene0000242	906	647	429	sp|Q8LBI1|RL51_ARATH	301	25	97	74	73	19	0	114.4	2.3e-24	sp|Q8LBI1|RL51_ARATH Large ribosomal subunit protein uL18z OS=Arabidopsis thaliana OX=3702 GN=RPL5A PE=1 SV=2
Unigene0000242	906	647	429	sp|P49227|RL52_ARATH	301	25	97	74	73	19	0	114.4	2.3e-24	sp|P49227|RL52_ARATH Large ribosomal subunit protein uL18y OS=Arabidopsis thaliana OX=3702 GN=RPL5B PE=2 SV=3
Unigene0000242	906	647	429	sp|A2WXX3|RL51_ORYSI	304	26	98	71.2	73	21	0	110.9	2.5e-23	sp|A2WXX3|RL51_ORYSI Large ribosomal subunit protein uL18 OS=Oryza sativa subsp. indica OX=39946 GN=RPL5A PE=3 SV=2
Unigene0000242	906	647	429	sp|Q0JGY1|RL51_ORYSJ	304	26	98	71.2	73	21	0	110.9	2.5e-23	sp|Q0JGY1|RL51_ORYSJ Large ribosomal subunit protein uL18z OS=Oryza sativa subsp. japonica OX=39947 GN=RPL5A PE=2 SV=1
Unigene0000242	906	647	429	sp|Q8L4L4|RL52_ORYSJ	304	26	98	71.2	73	21	0	110.9	2.5e-23	sp|Q8L4L4|RL52_ORYSJ Large ribosomal subunit protein uL18y OS=Oryza sativa subsp. japonica OX=39947 GN=RPL5B PE=2 SV=2
Unigene0000242	906	647	429	sp|Q4KTI3|RL5_SUBDO	293	25	97	64.4	73	26	0	100.1	4.5e-20	sp|Q4KTI3|RL5_SUBDO Large ribosomal subunit protein uL18 OS=Suberites domuncula OX=55567 GN=RPL5 PE=2 SV=1
Unigene0000242	906	647	429	sp|P15125|RL5A_XENLA	296	25	97	61.6	73	28	0	97.1	3.8e-19	sp|P15125|RL5A_XENLA Large ribosomal subunit protein uL18A OS=Xenopus laevis OX=8355 GN=rpl5-a PE=2 SV=2
Unigene0000242	906	647	429	sp|P15126|RL5B_XENLA	296	25	97	61.6	73	28	0	96.7	5.0e-19	sp|P15126|RL5B_XENLA Large ribosomal subunit protein uL18B OS=Xenopus laevis OX=8355 GN=rpl5-b PE=2 SV=2
Unigene0000242	906	647	429	sp|Q58DW5|RL5_BOVIN	297	25	97	61.6	73	28	0	96.7	5.0e-19	sp|Q58DW5|RL5_BOVIN Large ribosomal subunit protein uL18 OS=Bos taurus OX=9913 GN=RPL5 PE=2 SV=3
Unigene0000242	906	647	429	sp|P22451|RL5_CHICK	297	25	97	61.6	73	28	0	96.7	5.0e-19	sp|P22451|RL5_CHICK Large ribosomal subunit protein uL18 OS=Gallus gallus OX=9031 GN=RPL5 PE=2 SV=2
Unigene0000242	906	647	429	sp|P46777|RL5_HUMAN	297	25	97	61.6	73	28	0	96.7	5.0e-19	sp|P46777|RL5_HUMAN Large ribosomal subunit protein uL18 OS=Homo sapiens OX=9606 GN=RPL5 PE=1 SV=3
Unigene0000242	906	647	429	sp|P47962|RL5_MOUSE	297	25	97	61.6	73	28	0	96.7	5.0e-19	sp|P47962|RL5_MOUSE Large ribosomal subunit protein uL18 OS=Mus musculus OX=10090 GN=Rpl5 PE=1 SV=3
Unigene0000242	906	647	429	sp|Q95276|RL5_PIG	125	25	97	61.6	73	28	0	96.7	5.0e-19	sp|Q95276|RL5_PIG Large ribosomal subunit protein uL18 (Fragment) OS=Sus scrofa OX=9823 GN=RPL5 PE=2 SV=3
Unigene0000242	906	647	429	sp|P19949|RL5_RABIT	297	25	97	61.6	73	28	0	96.7	5.0e-19	sp|P19949|RL5_RABIT Large ribosomal subunit protein uL18 OS=Oryctolagus cuniculus OX=9986 GN=RPL5 PE=1 SV=3
Unigene0000242	906	647	429	sp|P09895|RL5_RAT	297	25	97	61.6	73	28	0	96.7	5.0e-19	sp|P09895|RL5_RAT Large ribosomal subunit protein uL18 OS=Rattus norvegicus OX=10116 GN=Rpl5 PE=1 SV=3
Unigene0000242	906	647	429	sp|Q26481|RL5_STYCL	295	25	97	60.3	73	29	0	96.7	5.0e-19	sp|Q26481|RL5_STYCL Large ribosomal subunit protein uL18 OS=Styela clava OX=7725 GN=RPL5 PE=3 SV=3
Unigene0000242	906	647	429	sp|Q54XX3|RL5_DICDI	292	25	97	60.3	73	29	0	95.5	1.1e-18	sp|Q54XX3|RL5_DICDI Large ribosomal subunit protein uL18 OS=Dictyostelium discoideum OX=44689 GN=rpl5 PE=1 SV=1
Unigene0000242	906	647	429	sp|Q4R5M0|RL5_MACFA	297	25	97	60.3	73	29	0	95.1	1.4e-18	sp|Q4R5M0|RL5_MACFA Large ribosomal subunit protein uL18 OS=Macaca fascicularis OX=9541 GN=RPL5 PE=2 SV=3
Unigene0000242	906	647	429	sp|Q627R7|RL5_CAEBR	294	25	97	60.3	73	29	0	94.7	1.9e-18	sp|Q627R7|RL5_CAEBR Large ribosomal subunit protein uL18 OS=Caenorhabditis briggsae OX=6238 GN=rpl-5 PE=3 SV=2
Unigene0000248	694	620	213	sp|Q0UY45|H3_PHANO	136	1	136	100	136	0	0	256.1	3.7e-67	sp|Q0UY45|H3_PHANO Histone H3 OS=Phaeosphaeria nodorum (strain SN15 / ATCC MYA-4574 / FGSC 10173) OX=321614 GN=HHT1 PE=3 SV=1
Unigene0000248	694	620	216	sp|A1CP80|H3_ASPCL	136	1	135	99.3	135	1	0	252.3	5.4e-66	sp|A1CP80|H3_ASPCL Histone H3 OS=Aspergillus clavatus (strain ATCC 1007 / CBS 513.65 / DSM 816 / NCTC 3887 / NRRL 1 / QM 1276 / 107) OX=344612 GN=hht1 PE=3 SV=1
Unigene0000248	694	620	216	sp|P61832|H3_ASPFU	136	1	135	99.3	135	1	0	252.3	5.4e-66	sp|P61832|H3_ASPFU Histone H3 OS=Aspergillus fumigatus (strain ATCC MYA-4609 / CBS 101355 / FGSC A1100 / Af293) OX=330879 GN=hhtA PE=3 SV=2
Unigene0000248	694	620	216	sp|A2QRR5|H3_ASPNC	136	1	135	99.3	135	1	0	252.3	5.4e-66	sp|A2QRR5|H3_ASPNC Histone H3 OS=Aspergillus niger (strain ATCC MYA-4892 / CBS 513.88 / FGSC A1513) OX=425011 GN=hht1 PE=3 SV=1
Unigene0000248	694	620	216	sp|Q2UCQ0|H3_ASPOR	136	1	135	99.3	135	1	0	252.3	5.4e-66	sp|Q2UCQ0|H3_ASPOR Histone H3 OS=Aspergillus oryzae (strain ATCC 42149 / RIB 40) OX=510516 GN=hhtA PE=3 SV=3
Unigene0000248	694	620	216	sp|Q0D0E8|H3_ASPTN	136	1	135	99.3	135	1	0	252.3	5.4e-66	sp|Q0D0E8|H3_ASPTN Histone H3 OS=Aspergillus terreus (strain NIH 2624 / FGSC A1156) OX=341663 GN=hht1 PE=3 SV=1
Unigene0000248	694	620	216	sp|Q6DL03|H3_CHAGB	136	1	135	99.3	135	1	0	252.3	5.4e-66	sp|Q6DL03|H3_CHAGB Histone H3 OS=Chaetomium globosum (strain ATCC 6205 / CBS 148.51 / DSM 1962 / NBRC 6347 / NRRL 1970) OX=306901 GN=HHT1 PE=2 SV=3
Unigene0000248	694	620	216	sp|P23753|H3_EMENI	136	1	135	99.3	135	1	0	252.3	5.4e-66	sp|P23753|H3_EMENI Histone H3 OS=Emericella nidulans (strain FGSC A4 / ATCC 38163 / CBS 112.46 / NRRL 194 / M139) OX=227321 GN=hhtA PE=1 SV=2
Unigene0000248	694	620	216	sp|Q4IER8|H3_GIBZE	136	1	135	99.3	135	1	0	252.3	5.4e-66	sp|Q4IER8|H3_GIBZE Histone H3 OS=Gibberella zeae (strain ATCC MYA-4620 / CBS 123657 / FGSC 9075 / NRRL 31084 / PH-1) OX=229533 GN=HHT1 PE=3 SV=3
Unigene0000248	694	620	216	sp|P61835|H3_HYPJE	136	1	135	99.3	135	1	0	252.3	5.4e-66	sp|P61835|H3_HYPJE Histone H3 OS=Hypocrea jecorina OX=51453 GN=HHT1 PE=3 SV=2
Unigene0000248	694	620	216	sp|Q5DWI3|H3_MARPO	136	1	135	99.3	135	1	0	252.3	5.4e-66	sp|Q5DWI3|H3_MARPO Histone H3 OS=Marchantia polymorpha OX=3197 PE=3 SV=3
Unigene0000248	694	620	216	sp|A1D240|H3_NEOFI	136	1	135	99.3	135	1	0	252.3	5.4e-66	sp|A1D240|H3_NEOFI Histone H3 OS=Neosartorya fischeri (strain ATCC 1020 / DSM 3700 / CBS 544.65 / FGSC A1164 / JCM 1740 / NRRL 181 / WB 181) OX=331117 GN=hht1 PE=3 SV=1
Unigene0000248	694	620	216	sp|P07041|H3_NEUCR	136	1	135	99.3	135	1	0	252.3	5.4e-66	sp|P07041|H3_NEUCR Histone H3 OS=Neurospora crassa (strain ATCC 24698 / 74-OR23-1A / CBS 708.71 / DSM 1257 / FGSC 987) OX=367110 GN=hh3 PE=1 SV=3
Unigene0000248	694	620	216	sp|A4RCX7|H3_PYRO7	136	1	135	99.3	135	1	0	252.3	5.4e-66	sp|A4RCX7|H3_PYRO7 Histone H3 OS=Pyricularia oryzae (strain 70-15 / ATCC MYA-4617 / FGSC 8958) OX=242507 GN=HHT1 PE=3 SV=1
Unigene0000248	694	620	216	sp|P61834|H3_TALFU	136	1	135	99.3	135	1	0	252.3	5.4e-66	sp|P61834|H3_TALFU Histone H3 OS=Talaromyces funiculosus OX=28572 GN=HHT1 PE=3 SV=2
Unigene0000248	694	620	216	sp|Q9P427|H3_AJECA	136	1	135	98.5	135	2	0	250.4	2.1e-65	sp|Q9P427|H3_AJECA Histone H3 OS=Ajellomyces capsulatus OX=5037 GN=HHT1 PE=3 SV=3
Unigene0000248	694	620	216	sp|Q1E225|H3_COCIM	136	1	135	97.8	135	3	0	250.4	2.1e-65	sp|Q1E225|H3_COCIM Histone H3 OS=Coccidioides immitis (strain RS) OX=246410 GN=HHT1 PE=3 SV=1
Unigene0000248	694	620	216	sp|Q6BRZ5|H31_DEBHA	136	1	135	97.8	135	3	0	249.2	4.6e-65	sp|Q6BRZ5|H31_DEBHA Histone H3.1/H3.2 OS=Debaryomyces hansenii (strain ATCC 36239 / CBS 767 / BCRC 21394 / JCM 1990 / NBRC 0083 / IGC 2968) OX=284592 GN=HHT1 PE=3 SV=3
Unigene0000248	694	620	216	sp|A5DFC5|H31_PICGU	136	1	135	97.8	135	3	0	249.2	4.6e-65	sp|A5DFC5|H31_PICGU Histone H3.1/H3.2 OS=Meyerozyma guilliermondii (strain ATCC 6260 / CBS 566 / DSM 6381 / JCM 1539 / NBRC 10279 / NRRL Y-324) OX=294746 GN=HHT1 PE=3 SV=1
Unigene0000248	694	620	216	sp|A3LXD5|H31_PICST	136	1	135	97.8	135	3	0	249.2	4.6e-65	sp|A3LXD5|H31_PICST Histone H3.1/H3.2 OS=Scheffersomyces stipitis (strain ATCC 58785 / CBS 6054 / NBRC 10063 / NRRL Y-11545) OX=322104 GN=HHT1 PE=3 SV=1
Unigene0000252	1372	1274	126	sp|O48716|JGB_ARATH	465	12	416	51.1	409	170	30	311.6	1.5e-83	sp|O48716|JGB_ARATH Protein JINGUBANG OS=Arabidopsis thaliana OX=3702 GN=JGB PE=1 SV=1
Unigene0000253	1343	1274	111	sp|O48716|JGB_ARATH	465	12	420	52.2	416	164	35	322.4	8.2e-87	sp|O48716|JGB_ARATH Protein JINGUBANG OS=Arabidopsis thaliana OX=3702 GN=JGB PE=1 SV=1
Unigene0000253	1343	1151	630	sp|O14170|POP2_SCHPO	703	366	547	24.9	197	110	38	56.2	1.1e-06	sp|O14170|POP2_SCHPO WD repeat-containing protein pop2 OS=Schizosaccharomyces pombe (strain 972 / ATCC 24843) OX=284812 GN=pop2 PE=1 SV=1
Unigene0000272	578	8	391	sp|P0CH06|RL401_SCHPO	128	1	128	94.5	128	7	0	246.1	3.2e-64	sp|P0CH06|RL401_SCHPO Ubiquitin-ribosomal protein eL40A fusion protein OS=Schizosaccharomyces pombe (strain 972 / ATCC 24843) OX=284812 GN=ubi1 PE=1 SV=1
Unigene0000272	578	8	391	sp|P0CH07|RL402_SCHPO	128	1	128	94.5	128	7	0	246.1	3.2e-64	sp|P0CH07|RL402_SCHPO Ubiquitin-ribosomal protein eL40B fusion protein OS=Schizosaccharomyces pombe (strain 972 / ATCC 24843) OX=284812 GN=uep1 PE=1 SV=1
Unigene0000272	578	8	391	sp|P0CH08|RL40A_YEAST	128	1	128	93	128	9	0	244.2	1.2e-63	sp|P0CH08|RL40A_YEAST Ubiquitin-ribosomal protein eL40A fusion protein OS=Saccharomyces cerevisiae (strain ATCC 204508 / S288c) OX=559292 GN=RPL40A PE=1 SV=1
Unigene0000272	578	8	391	sp|P0CH09|RL40B_YEAST	128	1	128	93	128	9	0	244.2	1.2e-63	sp|P0CH09|RL40B_YEAST Ubiquitin-ribosomal protein eL40B fusion protein OS=Saccharomyces cerevisiae (strain ATCC 204508 / S288c) OX=559292 GN=RPL40B PE=1 SV=1
Unigene0000272	578	8	391	sp|P0C224|RL40_NEUCR	128	1	128	93.8	128	8	0	243.8	1.6e-63	sp|P0C224|RL40_NEUCR Ubiquitin-ribosomal protein eL40 fusion protein OS=Neurospora crassa (strain ATCC 24698 / 74-OR23-1A / CBS 708.71 / DSM 1257 / FGSC 987) OX=367110 GN=crp-79 PE=1 SV=2
Unigene0000272	578	8	391	sp|P40909|RL40_CRYNJ	129	1	128	92.2	128	10	0	241.5	7.9e-63	sp|P40909|RL40_CRYNJ Ubiquitin-ribosomal protein eL40 fusion protein OS=Cryptococcus neoformans var. neoformans serotype D (strain JEC21 / ATCC MYA-565) OX=214684 GN=UBI1 PE=1 SV=2
Unigene0000272	578	8	391	sp|P46575|RL40_EIMBO	129	1	128	91.4	128	11	0	237.7	1.1e-61	sp|P46575|RL40_EIMBO Ubiquitin-ribosomal protein eL40 fusion protein OS=Eimeria bovis OX=5803 PE=2 SV=2
Unigene0000272	578	8	391	sp|P18101|RL40_DROME	128	1	128	90.6	128	12	0	236.5	2.5e-61	sp|P18101|RL40_DROME Ubiquitin-ribosomal protein eL40 fusion protein OS=Drosophila melanogaster OX=7227 GN=RpL40 PE=1 SV=2
Unigene0000272	578	8	391	sp|P49632|RL40_CAEEL	128	1	128	90.6	128	12	0	235.7	4.3e-61	sp|P49632|RL40_CAEEL Ubiquitin-ribosomal protein eL40 fusion protein OS=Caenorhabditis elegans OX=6239 GN=ubq-2 PE=3 SV=2
Unigene0000272	578	8	391	sp|P63048|RL40_BOVIN	128	1	128	89.1	128	14	0	231.5	8.2e-60	sp|P63048|RL40_BOVIN Ubiquitin-ribosomal protein eL40 fusion protein OS=Bos taurus OX=9913 GN=UBA52 PE=1 SV=2
Unigene0000272	578	8	391	sp|P63050|RL40_CANLF	128	1	128	89.1	128	14	0	231.5	8.2e-60	sp|P63050|RL40_CANLF Ubiquitin-ribosomal protein eL40 fusion protein OS=Canis lupus familiaris OX=9615 GN=UBA52 PE=2 SV=2
Unigene0000272	578	8	391	sp|P63052|RL40_FELCA	128	1	128	89.1	128	14	0	231.5	8.2e-60	sp|P63052|RL40_FELCA Ubiquitin-ribosomal protein eL40 fusion protein OS=Felis catus OX=9685 GN=UBA52 PE=2 SV=2
Unigene0000272	578	8	391	sp|P62987|RL40_HUMAN	128	1	128	89.1	128	14	0	231.5	8.2e-60	sp|P62987|RL40_HUMAN Ubiquitin-ribosomal protein eL40 fusion protein OS=Homo sapiens OX=9606 GN=UBA52 PE=1 SV=2
Unigene0000272	578	8	391	sp|P0C273|RL40_MACFA	128	1	128	89.1	128	14	0	231.5	8.2e-60	sp|P0C273|RL40_MACFA Ubiquitin-ribosomal protein eL40 fusion protein OS=Macaca fascicularis OX=9541 GN=UBA52 PE=2 SV=2
Unigene0000272	578	8	391	sp|P62984|RL40_MOUSE	128	1	128	89.1	128	14	0	231.5	8.2e-60	sp|P62984|RL40_MOUSE Ubiquitin-ribosomal protein eL40 fusion protein OS=Mus musculus OX=10090 GN=Uba52 PE=1 SV=2
Unigene0000272	578	8	391	sp|P68205|RL40_OPHHA	128	1	128	89.1	128	14	0	231.5	8.2e-60	sp|P68205|RL40_OPHHA Ubiquitin-ribosomal protein eL40 fusion protein OS=Ophiophagus hannah OX=8665 PE=2 SV=2
Unigene0000272	578	8	391	sp|P63053|RL40_PIG	128	1	128	89.1	128	14	0	231.5	8.2e-60	sp|P63053|RL40_PIG Ubiquitin-ribosomal protein eL40 fusion protein OS=Sus scrofa OX=9823 GN=UBA52 PE=1 SV=2
Unigene0000272	578	8	391	sp|P0C275|RL40_PONPY	128	1	128	89.1	128	14	0	231.5	8.2e-60	sp|P0C275|RL40_PONPY Ubiquitin-ribosomal protein eL40 fusion protein OS=Pongo pygmaeus OX=9600 GN=UBA52 PE=2 SV=2
Unigene0000272	578	8	391	sp|P0DXC2|RL40_RABIT	128	1	128	89.1	128	14	0	231.5	8.2e-60	sp|P0DXC2|RL40_RABIT Ubiquitin-ribosomal protein eL40 fusion protein OS=Oryctolagus cuniculus OX=9986 GN=UBA52 PE=1 SV=1
Unigene0000272	578	8	391	sp|P62986|RL40_RAT	128	1	128	89.1	128	14	0	231.5	8.2e-60	sp|P62986|RL40_RAT Ubiquitin-ribosomal protein eL40 fusion protein OS=Rattus norvegicus OX=10116 GN=Uba52 PE=1 SV=2
Unigene0000273	441	233	439	sp|Q94CA0|LAZH1_ARATH	484	1	70	51.4	70	33	1	68.9	5.4e-11	sp|Q94CA0|LAZH1_ARATH Protein LAZ1 homolog 1 OS=Arabidopsis thaliana OX=3702 GN=At1g77220 PE=2 SV=1
Unigene0000274	593	539	93	sp|P27073|RS19_EMENI	148	1	148	90.6	149	13	1	266.9	1.8e-70	sp|P27073|RS19_EMENI Small ribosomal subunit protein eS19 OS=Emericella nidulans (strain FGSC A4 / ATCC 38163 / CBS 112.46 / NRRL 194 / M139) OX=227321 GN=rps19 PE=3 SV=1
Unigene0000274	593	539	105	sp|P58234|RS19A_SCHPO	144	1	144	66.9	145	47	1	191.4	9.6e-48	sp|P58234|RS19A_SCHPO Small ribosomal subunit protein eS19A OS=Schizosaccharomyces pombe (strain 972 / ATCC 24843) OX=284812 GN=rps1901 PE=2 SV=1
Unigene0000274	593	539	108	sp|P79016|RS19B_SCHPO	143	1	143	66.7	144	47	1	190.7	1.6e-47	sp|P79016|RS19B_SCHPO Small ribosomal subunit protein eS19B OS=Schizosaccharomyces pombe (strain 972 / ATCC 24843) OX=284812 GN=rps1902 PE=3 SV=2
Unigene0000274	593	539	108	sp|P07281|RS19B_YEAST	144	1	144	62.8	145	52	2	184.1	1.5e-45	sp|P07281|RS19B_YEAST Small ribosomal subunit protein eS19B OS=Saccharomyces cerevisiae (strain ATCC 204508 / S288c) OX=559292 GN=RPS19B PE=1 SV=2
Unigene0000274	593	539	105	sp|A0A1D8PK61|RS19A_CANAL	145	1	145	64.4	146	50	2	183.7	2.0e-45	sp|A0A1D8PK61|RS19A_CANAL Small ribosomal subunit protein eS19 OS=Candida albicans (strain SC5314 / ATCC MYA-2876) OX=237561 GN=RPS19A PE=1 SV=1
Unigene0000274	593	539	108	sp|P07280|RS19A_YEAST	144	1	144	62.8	145	52	2	183.3	2.6e-45	sp|P07280|RS19A_YEAST Small ribosomal subunit protein eS19A OS=Saccharomyces cerevisiae (strain ATCC 204508 / S288c) OX=559292 GN=RPS19A PE=1 SV=2
Unigene0000274	593	536	132	sp|Q8T5Z4|RS19_BRABE	147	3	136	56.3	135	58	1	152.1	6.5e-36	sp|Q8T5Z4|RS19_BRABE Small ribosomal subunit protein eS19 OS=Branchiostoma belcheri OX=7741 GN=RPS19 PE=2 SV=1
Unigene0000274	593	539	120	sp|Q9Y0H3|RS19_MYXGL	145	1	139	52.9	140	65	1	149.8	3.2e-35	sp|Q9Y0H3|RS19_MYXGL Small ribosomal subunit protein eS19 OS=Myxine glutinosa OX=7769 GN=rps19 PE=2 SV=1
Unigene0000274	593	533	132	sp|Q9SGA6|RS191_ARATH	143	4	136	51.5	134	64	1	146.4	3.6e-34	sp|Q9SGA6|RS191_ARATH Small ribosomal subunit protein eS19z OS=Arabidopsis thaliana OX=3702 GN=RPS19A PE=2 SV=1
Unigene0000274	593	533	132	sp|Q9LF30|RS192_ARATH	143	4	136	52.2	134	63	1	146	4.6e-34	sp|Q9LF30|RS192_ARATH Small ribosomal subunit protein eS19y OS=Arabidopsis thaliana OX=3702 GN=RPS19B PE=2 SV=1
Unigene0000274	593	533	132	sp|Q9FNP8|RS193_ARATH	143	4	136	50.7	134	65	1	144.4	1.4e-33	sp|Q9FNP8|RS193_ARATH Small ribosomal subunit protein eS19x OS=Arabidopsis thaliana OX=3702 GN=RPS19C PE=2 SV=1
Unigene0000274	593	533	132	sp|Q94613|RS19_MYAAR	149	2	134	48.5	134	68	1	144.1	1.8e-33	sp|Q94613|RS19_MYAAR Small ribosomal subunit protein eS19 OS=Mya arenaria OX=6604 GN=RPS19 PE=2 SV=1
Unigene0000274	593	530	129	sp|Q54X51|RS19_DICDI	148	6	139	44.8	134	74	0	121.7	9.4e-27	sp|Q54X51|RS19_DICDI Small ribosomal subunit protein eS19 OS=Dictyostelium discoideum OX=44689 GN=rps19 PE=3 SV=1
Unigene0000274	593	527	132	sp|O27653|RS19E_METTH	145	3	132	41.7	132	75	2	97.8	1.5e-19	sp|O27653|RS19E_METTH Small ribosomal subunit protein eS19 OS=Methanothermobacter thermautotrophicus (strain ATCC 29096 / DSM 1053 / JCM 10044 / NBRC 100330 / Delta H) OX=187420 GN=rps19e PE=3 SV=1
Unigene0000286	868	342	761	sp|Q9C5C5|TRL4_ARATH	204	60	201	69.7	142	41	2	199.9	4.0e-50	sp|Q9C5C5|TRL4_ARATH Thioredoxin-like 4, chloroplastic OS=Arabidopsis thaliana OX=3702 GN=At1g07700 PE=2 SV=1
Unigene0000286	868	396	767	sp|Q6YTI3|TRL4_ORYSJ	214	78	201	73.4	124	33	0	198.4	1.2e-49	sp|Q6YTI3|TRL4_ORYSJ Thioredoxin-like 4, chloroplastic OS=Oryza sativa subsp. japonica OX=39947 GN=Os02g0567100 PE=2 SV=1
Unigene0000291	534	44	364	sp|P00049|CYC_USTSP	107	1	107	80.4	107	21	0	189.1	4.3e-47	sp|P00049|CYC_USTSP Cytochrome c OS=Ustilago sphaerogena OX=5271 PE=1 SV=1
Unigene0000291	534	41	364	sp|Q41346|CYC_STELP	108	1	108	78.7	108	23	0	188.7	5.6e-47	sp|Q41346|CYC_STELP Cytochrome c OS=Stellaria longipes OX=19744 PE=3 SV=1
Unigene0000291	534	41	364	sp|Q96VP3|CYC_COCLU	108	1	108	76.9	108	25	0	182.6	4.0e-45	sp|Q96VP3|CYC_COCLU Cytochrome c OS=Cochliobolus lunatus OX=5503 PE=3 SV=1
Unigene0000291	534	41	361	sp|P00048|CYC_NEUCR	108	1	107	74.8	107	27	0	179.1	4.5e-44	sp|P00048|CYC_NEUCR Cytochrome c OS=Neurospora crassa (strain ATCC 24698 / 74-OR23-1A / CBS 708.71 / DSM 1257 / FGSC 987) OX=367110 GN=cyc-1 PE=1 SV=2
Unigene0000291	534	47	364	sp|P00047|CYC_THELA	111	6	111	76.4	106	25	0	178.3	7.6e-44	sp|P00047|CYC_THELA Cytochrome c OS=Thermomyces lanuginosus OX=5541 PE=1 SV=1
Unigene0000291	534	56	364	sp|P29380|CYC_ARATH	112	10	112	78.6	103	22	0	177.2	1.7e-43	sp|P29380|CYC_ARATH Cytochrome c OS=Arabidopsis thaliana OX=3702 GN=CC-1 PE=3 SV=1
Unigene0000291	534	41	361	sp|P59218|CYC_ROSNE	108	1	107	75.7	107	26	0	175.6	4.9e-43	sp|P59218|CYC_ROSNE Cytochrome c OS=Rosellinia necatrix OX=77044 GN=CYTC PE=3 SV=1
Unigene0000291	534	41	361	sp|P00046|CYC_SCHPO	109	1	107	73.8	107	28	0	173.3	2.5e-42	sp|P00046|CYC_SCHPO Cytochrome c OS=Schizosaccharomyces pombe (strain 972 / ATCC 24843) OX=284812 GN=cyc1 PE=1 SV=3
Unigene0000291	534	44	364	sp|P00045|CYC7_YEAST	113	7	113	72	107	30	0	171.4	9.3e-42	sp|P00045|CYC7_YEAST Cytochrome c isoform 2 OS=Saccharomyces cerevisiae (strain ATCC 204508 / S288c) OX=559292 GN=CYC7 PE=1 SV=1
Unigene0000291	534	47	361	sp|P56205|CYC_ASPNG	111	6	110	74.3	105	27	0	170.6	1.6e-41	sp|P56205|CYC_ASPNG Cytochrome c OS=Aspergillus niger OX=5061 GN=cycA PE=1 SV=1
Unigene0000291	534	56	364	sp|Q4HVX7|CYC_GIBZE	106	4	106	74.8	103	26	0	168.7	6.0e-41	sp|Q4HVX7|CYC_GIBZE Cytochrome c OS=Gibberella zeae (strain ATCC MYA-4620 / CBS 123657 / FGSC 9075 / NRRL 31084 / PH-1) OX=229533 GN=CYC1 PE=3 SV=4
Unigene0000291	534	47	364	sp|P00042|CYC_WICAO	109	4	109	69.8	106	32	0	165.6	5.1e-40	sp|P00042|CYC_WICAO Cytochrome c OS=Wickerhamomyces anomalus OX=4927 PE=1 SV=1
Unigene0000291	534	47	364	sp|Q6Q4H8|CYC_PICPA	110	5	110	71.7	106	30	0	164.5	1.1e-39	sp|Q6Q4H8|CYC_PICPA Cytochrome c OS=Komagataella pastoris OX=4922 GN=CYC1 PE=3 SV=3
Unigene0000291	534	47	361	sp|P53698|CYC_CANAL	110	5	109	70.5	105	31	0	162.5	4.3e-39	sp|P53698|CYC_CANAL Cytochrome c OS=Candida albicans (strain SC5314 / ATCC MYA-2876) OX=237561 GN=CYC1 PE=3 SV=3
Unigene0000291	534	47	361	sp|P38091|CYC_EMENI	113	8	112	70.5	105	31	0	162.5	4.3e-39	sp|P38091|CYC_EMENI Cytochrome c OS=Emericella nidulans (strain FGSC A4 / ATCC 38163 / CBS 112.46 / NRRL 194 / M139) OX=227321 GN=cycA PE=2 SV=3
Unigene0000291	534	41	355	sp|Q6C9Q0|CYC_YARLI	107	1	105	68.6	105	33	0	162.5	4.3e-39	sp|Q6C9Q0|CYC_YARLI Cytochrome c OS=Yarrowia lipolytica (strain CLIB 122 / E 150) OX=284591 GN=CYC1 PE=3 SV=1
Unigene0000291	534	41	364	sp|P12831|CYC_SARPE	108	1	108	69.4	108	33	0	162.2	5.7e-39	sp|P12831|CYC_SARPE Cytochrome c OS=Sarcophaga peregrina OX=7386 PE=1 SV=2
Unigene0000291	534	56	361	sp|P21665|CYC_VARVA	105	2	103	70.6	102	30	0	162.2	5.7e-39	sp|P21665|CYC_VARVA Cytochrome c OS=Varanus varius OX=8559 PE=1 SV=2
Unigene0000291	534	47	355	sp|P00044|CYC1_YEAST	109	4	106	70.9	103	30	0	161.8	7.4e-39	sp|P00044|CYC1_YEAST Cytochrome c isoform 1 OS=Saccharomyces cerevisiae (strain ATCC 204508 / S288c) OX=559292 GN=CYC1 PE=1 SV=2
Unigene0000291	534	47	364	sp|O13393|CYC_PICST	110	5	110	69.8	106	32	0	161.8	7.4e-39	sp|O13393|CYC_PICST Cytochrome c OS=Scheffersomyces stipitis (strain ATCC 58785 / CBS 6054 / NBRC 10063 / NRRL Y-11545) OX=322104 GN=CYC1 PE=3 SV=3
Unigene0000299	2037	2012	3	sp|Q2UL89|DUS3_ASPOR	730	60	721	69.7	670	195	8	969.9	1.5e-281	sp|Q2UL89|DUS3_ASPOR tRNA-dihydrouridine(47) synthase [NAD(P)(+)] OS=Aspergillus oryzae (strain ATCC 42149 / RIB 40) OX=510516 GN=dus3 PE=3 SV=1
Unigene0000299	2037	2021	3	sp|Q0CZL3|DUS3_ASPTN	719	53	712	71.6	673	178	13	966.1	2.2e-280	sp|Q0CZL3|DUS3_ASPTN tRNA-dihydrouridine(47) synthase [NAD(P)(+)] OS=Aspergillus terreus (strain NIH 2624 / FGSC A1156) OX=341663 GN=dus3 PE=3 SV=1
Unigene0000299	2037	2012	3	sp|Q4WRX4|DUS3_ASPFU	726	55	719	67	675	208	15	949.5	2.1e-275	sp|Q4WRX4|DUS3_ASPFU tRNA-dihydrouridine(47) synthase [NAD(P)(+)] OS=Aspergillus fumigatus (strain ATCC MYA-4609 / CBS 101355 / FGSC A1100 / Af293) OX=330879 GN=dus3 PE=3 SV=1
Unigene0000299	2037	2012	3	sp|A1D1U0|DUS3_NEOFI	726	55	719	66.8	674	211	13	944.5	6.7e-274	sp|A1D1U0|DUS3_NEOFI tRNA-dihydrouridine(47) synthase [NAD(P)(+)] OS=Neosartorya fischeri (strain ATCC 1020 / DSM 3700 / CBS 544.65 / FGSC A1164 / JCM 1740 / NRRL 181 / WB 181) OX=331117 GN=dus3 PE=3 SV=1
Unigene0000299	2037	2033	3	sp|A1CNY3|DUS3_ASPCL	728	53	721	68.4	677	206	8	933.3	1.5e-270	sp|A1CNY3|DUS3_ASPCL tRNA-dihydrouridine(47) synthase [NAD(P)(+)] OS=Aspergillus clavatus (strain ATCC 1007 / CBS 513.65 / DSM 816 / NCTC 3887 / NRRL 1 / QM 1276 / 107) OX=344612 GN=dus3 PE=3 SV=1
Unigene0000299	2037	2012	3	sp|A2QAU6|DUS3_ASPNC	748	66	740	66.6	680	212	15	926	2.5e-268	sp|A2QAU6|DUS3_ASPNC tRNA-dihydrouridine(47) synthase [NAD(P)(+)] OS=Aspergillus niger (strain ATCC MYA-4892 / CBS 513.88 / FGSC A1513) OX=425011 GN=dus3 PE=3 SV=1
Unigene0000299	2037	2012	3	sp|Q5BF62|DUS3_EMENI	714	49	707	68.6	672	196	15	914.1	9.7e-265	sp|Q5BF62|DUS3_EMENI tRNA-dihydrouridine(47) synthase [NAD(P)(+)] OS=Emericella nidulans (strain FGSC A4 / ATCC 38163 / CBS 112.46 / NRRL 194 / M139) OX=227321 GN=dus3 PE=3 SV=1
Unigene0000299	2037	2012	3	sp|A6QYC6|DUS3_AJECN	741	62	732	65.3	681	215	21	874.8	6.5e-253	sp|A6QYC6|DUS3_AJECN tRNA-dihydrouridine(47) synthase [NAD(P)(+)] OS=Ajellomyces capsulatus (strain NAm1 / WU24) OX=2059318 GN=DUS3 PE=3 SV=1
Unigene0000299	2037	2012	3	sp|Q1E2F4|DUS3_COCIM	724	54	717	61.5	672	249	10	864	1.2e-249	sp|Q1E2F4|DUS3_COCIM tRNA-dihydrouridine(47) synthase [NAD(P)(+)] OS=Coccidioides immitis (strain RS) OX=246410 GN=DUS3 PE=3 SV=1
Unigene0000299	2037	2024	3	sp|A7EKL8|DUS3_SCLS1	750	77	741	61.3	682	239	25	811.6	6.8e-234	sp|A7EKL8|DUS3_SCLS1 tRNA-dihydrouridine(47) synthase [NAD(P)(+)] OS=Sclerotinia sclerotiorum (strain ATCC 18683 / 1980 / Ss-1) OX=665079 GN=dus3 PE=3 SV=1
Unigene0000299	2037	2033	3	sp|A6RMI1|DUS3_BOTFB	750	74	741	59.7	682	256	19	806.2	2.9e-232	sp|A6RMI1|DUS3_BOTFB tRNA-dihydrouridine(47) synthase [NAD(P)(+)] OS=Botryotinia fuckeliana (strain B05.10) OX=332648 GN=dus3 PE=3 SV=1
Unigene0000299	2037	1829	3	sp|Q0U9D6|DUS3_PHANO	739	134	730	62.9	609	214	12	790.8	1.2e-227	sp|Q0U9D6|DUS3_PHANO tRNA-dihydrouridine(47) synthase [NAD(P)(+)] OS=Phaeosphaeria nodorum (strain SN15 / ATCC MYA-4574 / FGSC 10173) OX=321614 GN=DUS3 PE=3 SV=2
Unigene0000299	2037	2030	3	sp|Q2HDP2|DUS3_CHAGB	713	39	704	54.9	681	287	20	753.8	1.7e-216	sp|Q2HDP2|DUS3_CHAGB tRNA-dihydrouridine(47) synthase [NAD(P)(+)] OS=Chaetomium globosum (strain ATCC 6205 / CBS 148.51 / DSM 1962 / NBRC 6347 / NRRL 1970) OX=306901 GN=DUS3 PE=3 SV=2
Unigene0000299	2037	2021	3	sp|Q7SG01|DUS3_NEUCR	737	66	727	55.7	682	273	29	744.6	1.0e-213	sp|Q7SG01|DUS3_NEUCR tRNA-dihydrouridine(47) synthase [NAD(P)(+)] OS=Neurospora crassa (strain ATCC 24698 / 74-OR23-1A / CBS 708.71 / DSM 1257 / FGSC 987) OX=367110 GN=dus-3 PE=3 SV=1
Unigene0000299	2037	2027	3	sp|A4RLF4|DUS3_PYRO7	739	69	730	53.9	681	289	25	721.5	9.2e-207	sp|A4RLF4|DUS3_PYRO7 tRNA-dihydrouridine(47) synthase [NAD(P)(+)] OS=Pyricularia oryzae (strain 70-15 / ATCC MYA-4617 / FGSC 8958) OX=242507 GN=DUS3 PE=3 SV=1
Unigene0000299	2037	2009	3	sp|A5DBS1|DUS3_PICGU	607	23	601	42.7	670	292	92	498	1.7e-139	sp|A5DBS1|DUS3_PICGU tRNA-dihydrouridine(47) synthase [NAD(P)(+)] OS=Meyerozyma guilliermondii (strain ATCC 6260 / CBS 566 / DSM 6381 / JCM 1539 / NBRC 10279 / NRRL Y-324) OX=294746 GN=DUS3 PE=3 SV=2
Unigene0000299	2037	2006	3	sp|Q6BS64|DUS3_DEBHA	622	32	616	44.6	670	284	87	492.3	9.1e-138	sp|Q6BS64|DUS3_DEBHA tRNA-dihydrouridine(47) synthase [NAD(P)(+)] OS=Debaryomyces hansenii (strain ATCC 36239 / CBS 767 / BCRC 21394 / JCM 1990 / NBRC 0083 / IGC 2968) OX=284592 GN=DUS3 PE=3 SV=1
Unigene0000299	2037	1745	3	sp|Q5ALL3|DUS3_CANAL	613	102	607	45.3	583	240	79	485.7	8.5e-136	sp|Q5ALL3|DUS3_CANAL tRNA-dihydrouridine(47) synthase [NAD(P)(+)] OS=Candida albicans (strain SC5314 / ATCC MYA-2876) OX=237561 GN=DUS3 PE=3 SV=2
Unigene0000299	2037	1826	3	sp|A5DTS1|DUS3_LODEL	642	92	637	45	611	268	68	481.5	1.6e-134	sp|A5DTS1|DUS3_LODEL tRNA-dihydrouridine(47) synthase [NAD(P)(+)] OS=Lodderomyces elongisporus (strain ATCC 11503 / CBS 2605 / JCM 1781 / NBRC 1676 / NRRL YB-4239) OX=379508 GN=DUS3 PE=3 SV=1
Unigene0000299	2037	1826	3	sp|Q6C4K3|DUS3_YARLI	622	81	614	42.1	610	275	78	467.2	3.1e-130	sp|Q6C4K3|DUS3_YARLI tRNA-dihydrouridine(47) synthase [NAD(P)(+)] OS=Yarrowia lipolytica (strain CLIB 122 / E 150) OX=284591 GN=DUS3 PE=3 SV=1
Unigene0000311	702	597	352	sp|Q7RVN2|RS27_NEUCR	82	1	82	93.9	82	5	0	164.9	1.1e-39	sp|Q7RVN2|RS27_NEUCR Small ribosomal subunit protein eS27 OS=Neurospora crassa (strain ATCC 24698 / 74-OR23-1A / CBS 708.71 / DSM 1257 / FGSC 987) OX=367110 GN=crp-6 PE=1 SV=1
Unigene0000311	702	597	352	sp|O74330|RS27_SCHPO	83	1	82	84.1	82	13	0	147.5	1.9e-34	sp|O74330|RS27_SCHPO Small ribosomal subunit protein eS27 OS=Schizosaccharomyces pombe (strain 972 / ATCC 24843) OX=284812 GN=rps27 PE=3 SV=1
Unigene0000311	702	597	352	sp|Q2KHT7|RS27_BOVIN	84	1	82	80.5	82	16	0	142.1	8.0e-33	sp|Q2KHT7|RS27_BOVIN Small ribosomal subunit protein eS27 OS=Bos taurus OX=9913 GN=RPS27 PE=1 SV=3
Unigene0000311	702	597	352	sp|P42677|RS27_HUMAN	84	1	82	80.5	82	16	0	142.1	8.0e-33	sp|P42677|RS27_HUMAN Small ribosomal subunit protein eS27 OS=Homo sapiens OX=9606 GN=RPS27 PE=1 SV=3
Unigene0000311	702	597	352	sp|Q6ZWU9|RS27_MOUSE	84	1	82	80.5	82	16	0	142.1	8.0e-33	sp|Q6ZWU9|RS27_MOUSE Small ribosomal subunit protein eS27 OS=Mus musculus OX=10090 GN=Rps27 PE=1 SV=3
Unigene0000311	702	597	352	sp|G1TZ76|RS27_RABIT	84	1	82	80.5	82	16	0	142.1	8.0e-33	sp|G1TZ76|RS27_RABIT Small ribosomal subunit protein eS27 OS=Oryctolagus cuniculus OX=9986 GN=RPS27 PE=1 SV=1
Unigene0000311	702	597	352	sp|Q71TY3|RS27_RAT	84	1	82	80.5	82	16	0	142.1	8.0e-33	sp|Q71TY3|RS27_RAT Small ribosomal subunit protein eS27 OS=Rattus norvegicus OX=10116 GN=Rps27 PE=1 SV=3
Unigene0000311	702	597	352	sp|P47904|RS27_XENLA	84	1	82	79.3	82	17	0	141	1.8e-32	sp|P47904|RS27_XENLA Small ribosomal subunit protein eS27 OS=Xenopus laevis OX=8355 GN=rps27 PE=3 SV=2
Unigene0000311	702	597	352	sp|Q5RBK1|RS27_PONAB	84	1	82	79.3	82	17	0	139.4	5.2e-32	sp|Q5RBK1|RS27_PONAB Small ribosomal subunit protein eS27 OS=Pongo abelii OX=9601 GN=RPS27 PE=3 SV=3
Unigene0000311	702	597	352	sp|Q71UM5|RS27L_HUMAN	84	1	82	78	82	18	0	137.1	2.6e-31	sp|Q71UM5|RS27L_HUMAN Ribosomal protein eS27-like OS=Homo sapiens OX=9606 GN=RPS27L PE=1 SV=3
Unigene0000311	702	597	352	sp|Q6ZWY3|RS27L_MOUSE	84	1	82	78	82	18	0	137.1	2.6e-31	sp|Q6ZWY3|RS27L_MOUSE Small ribosomal subunit protein eS27-like OS=Mus musculus OX=10090 GN=Rps27l PE=1 SV=3
Unigene0000311	702	597	352	sp|P24051|RS27L_RAT	84	1	82	78	82	18	0	137.1	2.6e-31	sp|P24051|RS27L_RAT Small ribosomal subunit protein eS27-like OS=Rattus norvegicus OX=10116 GN=Rps27l PE=1 SV=3
Unigene0000311	702	597	352	sp|Q3T0B7|RS27L_BOVIN	84	1	82	78	82	18	0	136.7	3.3e-31	sp|Q3T0B7|RS27L_BOVIN Small ribosomal subunit protein eS27-like OS=Bos taurus OX=9913 GN=RPS27L PE=3 SV=3
Unigene0000311	702	597	352	sp|A0A1D8PTI7|RS27_CANAL	82	1	82	78	82	18	0	135.2	9.7e-31	sp|A0A1D8PTI7|RS27_CANAL Small ribosomal subunit protein eS27 OS=Candida albicans (strain SC5314 / ATCC MYA-2876) OX=237561 GN=RPS27 PE=1 SV=1
Unigene0000311	702	597	352	sp|P55833|RS27_HOMAM	84	1	82	75.6	82	20	0	133.7	2.8e-30	sp|P55833|RS27_HOMAM Small ribosomal subunit protein eS27 OS=Homarus americanus OX=6706 GN=RPS27 PE=3 SV=2
Unigene0000311	702	585	352	sp|Q9M2F1|RS272_ARATH	86	7	84	76.9	78	18	0	133.3	3.7e-30	sp|Q9M2F1|RS272_ARATH Small ribosomal subunit protein eS27y OS=Arabidopsis thaliana OX=3702 GN=RPS27B PE=2 SV=2
Unigene0000311	702	585	352	sp|Q8L953|RS273_ARATH	84	7	84	76.9	78	18	0	132.5	6.3e-30	sp|Q8L953|RS273_ARATH Small ribosomal subunit protein eS27w OS=Arabidopsis thaliana OX=3702 GN=RPS27D PE=2 SV=2
Unigene0000311	702	585	352	sp|Q96564|RS27_HORVU	86	7	84	78.2	78	17	0	131.7	1.1e-29	sp|Q96564|RS27_HORVU Small ribosomal subunit protein eS27 OS=Hordeum vulgare OX=4513 GN=RPS27 PE=3 SV=2
Unigene0000311	702	597	352	sp|P38711|RS27B_YEAST	82	1	82	74.4	82	21	0	130.2	3.1e-29	sp|P38711|RS27B_YEAST Small ribosomal subunit protein eS27B OS=Saccharomyces cerevisiae (strain ATCC 204508 / S288c) OX=559292 GN=RPS27B PE=1 SV=1
Unigene0000311	702	597	352	sp|P35997|RS27A_YEAST	82	1	82	73.2	82	22	0	129.8	4.1e-29	sp|P35997|RS27A_YEAST Small ribosomal subunit protein eS27A OS=Saccharomyces cerevisiae (strain ATCC 204508 / S288c) OX=559292 GN=RPS27A PE=1 SV=1
Unigene0000351	483	142	483	sp|S4VGD0|NBCL_LUPLU	486	1	117	65	117	38	3	147.1	1.7e-34	sp|S4VGD0|NBCL_LUPLU BTB/POZ domain and ankyrin repeat-containing protein BOP OS=Lupinus luteus OX=3873 GN=BOP PE=2 SV=1
Unigene0000351	483	142	483	sp|A0A0K0PU92|NBCL_LUPAN	486	1	117	65	117	38	3	146.7	2.2e-34	sp|A0A0K0PU92|NBCL_LUPAN BTB/POZ domain and ankyrin repeat-containing protein NBCL OS=Lupinus angustifolius OX=3871 GN=NBCL PE=1 SV=1
Unigene0000351	483	142	483	sp|Q2HW56|NOOT1_MEDTR	482	1	109	69.3	114	30	5	146.4	2.9e-34	sp|Q2HW56|NOOT1_MEDTR BTB/POZ domain and ankyrin repeat-containing protein NOOT1 OS=Medicago truncatula OX=3880 GN=NOOT1 PE=2 SV=1
Unigene0000351	483	142	483	sp|G8GTN7|COCH_PEA	483	1	107	67.5	114	30	7	144.8	8.5e-34	sp|G8GTN7|COCH_PEA BTB/POZ domain and ankyrin repeat-containing protein COCH OS=Pisum sativum OX=3888 GN=COCH PE=2 SV=1
Unigene0000351	483	142	483	sp|G3LSH3|NBCL_LOTJA	483	1	111	66.1	118	29	11	144.8	8.5e-34	sp|G3LSH3|NBCL_LOTJA BTB/POZ domain and ankyrin repeat-containing protein NBCL OS=Lotus japonicus OX=34305 GN=NBCL PE=1 SV=1
Unigene0000351	483	142	483	sp|A0A072VIM5|NOOT2_MEDTR	492	1	109	64	114	36	5	142.5	4.2e-33	sp|A0A072VIM5|NOOT2_MEDTR BTB/POZ domain and ankyrin repeat-containing protein NOOT2 OS=Medicago truncatula OX=3880 GN=NOOT2 PE=2 SV=1
Unigene0000351	483	151	483	sp|Q9M1I7|NPR6_ARATH	467	6	113	66.7	111	34	3	140.2	2.1e-32	sp|Q9M1I7|NPR6_ARATH Regulatory protein NPR6 OS=Arabidopsis thaliana OX=3702 GN=NPR6 PE=1 SV=1
Unigene0000351	483	151	483	sp|Q9ZVC2|NPR5_ARATH	491	5	118	66.4	116	32	7	137.9	1.0e-31	sp|Q9ZVC2|NPR5_ARATH Regulatory protein NPR5 OS=Arabidopsis thaliana OX=3702 GN=NPR5 PE=1 SV=1
Unigene0000351	483	151	483	sp|A2CIR7|NPR5_ORYSJ	506	2	133	54.5	132	39	21	126.7	2.4e-28	sp|A2CIR7|NPR5_ORYSJ BTB/POZ domain and ankyrin repeat-containing protein NPR5 OS=Oryza sativa subsp. japonica OX=39947 GN=NPR5 PE=1 SV=1
Unigene0000351	483	142	483	sp|Q2QXZ2|NH52_ORYSJ	494	1	133	51.1	133	46	19	114.8	9.4e-25	sp|Q2QXZ2|NH52_ORYSJ BTB/POZ domain and ankyrin repeat-containing protein NH5.2 OS=Oryza sativa subsp. japonica OX=39947 GN=NH5.2 PE=1 SV=1
Unigene0000351	483	142	483	sp|Q2RAQ5|NH51_ORYSJ	494	1	132	50.8	132	47	18	113.2	2.7e-24	sp|Q2RAQ5|NH51_ORYSJ BTB/POZ domain and ankyrin repeat-containing protein NH5.1 OS=Oryza sativa subsp. japonica OX=39947 GN=NH5.1 PE=1 SV=1
Unigene0000352	328	326	3	sp|Q9M086|DCAF1_ARATH	1883	672	769	55.5	110	35	14	112.8	2.4e-24	sp|Q9M086|DCAF1_ARATH DDB1- and CUL4-associated factor homolog 1 OS=Arabidopsis thaliana OX=3702 GN=DCAF1 PE=1 SV=2
Unigene0000385	2334	2308	206	sp|Q9LFH9|LRK81_ARATH	715	5	697	57.5	704	285	14	760.8	1.6e-218	sp|Q9LFH9|LRK81_ARATH L-type lectin-domain containing receptor kinase VIII.1 OS=Arabidopsis thaliana OX=3702 GN=LECRK81 PE=2 SV=1
Unigene0000385	2334	2260	203	sp|Q9LYX1|LRK82_ARATH	711	34	696	59	692	249	35	742.7	4.4e-213	sp|Q9LYX1|LRK82_ARATH L-type lectin-domain containing receptor kinase VIII.2 OS=Arabidopsis thaliana OX=3702 GN=LECRK82 PE=2 SV=1
Unigene0000385	2334	2257	245	sp|Q9FHG4|LRKS7_ARATH	681	31	669	46.8	684	306	58	576.6	4.2e-163	sp|Q9FHG4|LRKS7_ARATH Probable L-type lectin-domain containing receptor kinase S.7 OS=Arabidopsis thaliana OX=3702 GN=LECRKS7 PE=2 SV=1
Unigene0000385	2334	2257	305	sp|Q9FHX3|LRKS6_ARATH	691	17	658	37.7	684	351	75	399.8	7.1e-110	sp|Q9FHX3|LRKS6_ARATH L-type lectin-domain containing receptor kinase S.6 OS=Arabidopsis thaliana OX=3702 GN=LECRKS6 PE=2 SV=1
Unigene0000385	2334	2290	179	sp|Q9M2S4|LRKS4_ARATH	684	11	672	35.6	728	379	90	371.7	2.1e-101	sp|Q9M2S4|LRKS4_ARATH L-type lectin-domain containing receptor kinase S.4 OS=Arabidopsis thaliana OX=3702 GN=LECRKS4 PE=2 SV=1
Unigene0000385	2334	2317	305	sp|A0A0P0VIP0|LRSK7_ORYSJ	695	1	668	37.2	713	361	87	369.8	7.8e-101	sp|A0A0P0VIP0|LRSK7_ORYSJ L-type lectin-domain containing receptor kinase S.7 OS=Oryza sativa subsp. japonica OX=39947 GN=LECRKS7 PE=1 SV=1
Unigene0000385	2334	2323	206	sp|Q7XUN6|SIT2_ORYSJ	673	1	663	35.3	730	381	91	369	1.3e-100	sp|Q7XUN6|SIT2_ORYSJ L-type lectin-domain containing receptor kinase SIT2 OS=Oryza sativa subsp. japonica OX=39947 GN=SIT2 PE=2 SV=2
Unigene0000385	2334	2140	326	sp|O80939|LRK41_ARATH	675	64	625	35.6	627	317	87	358.6	1.8e-97	sp|O80939|LRK41_ARATH L-type lectin-domain containing receptor kinase IV.1 OS=Arabidopsis thaliana OX=3702 GN=LECRK41 PE=2 SV=1
Unigene0000385	2334	2296	326	sp|O81292|LRK43_ARATH	674	6	633	34.8	689	356	93	358.2	2.4e-97	sp|O81292|LRK43_ARATH L-type lectin-domain containing receptor kinase IV.3 OS=Arabidopsis thaliana OX=3702 GN=LECRK43 PE=2 SV=1
Unigene0000385	2334	2266	302	sp|Q9FG33|LRKS5_ARATH	652	22	621	34.8	675	345	95	353.2	7.6e-96	sp|Q9FG33|LRKS5_ARATH Probable L-type lectin-domain containing receptor kinase S.5 OS=Arabidopsis thaliana OX=3702 GN=LECRKS5 PE=2 SV=1
Unigene0000385	2334	2296	326	sp|O81291|LRK44_ARATH	669	11	628	35.4	684	349	93	348.6	1.9e-94	sp|O81291|LRK44_ARATH L-type lectin-domain containing receptor kinase IV.4 OS=Arabidopsis thaliana OX=3702 GN=LECRK44 PE=3 SV=1
Unigene0000385	2334	2287	293	sp|Q9LXA5|LRK91_ARATH	651	10	625	34.7	691	350	101	348.6	1.9e-94	sp|Q9LXA5|LRK91_ARATH L-type lectin-domain containing receptor kinase IX.1 OS=Arabidopsis thaliana OX=3702 GN=LECRK91 PE=1 SV=1
Unigene0000385	2334	2140	176	sp|Q9M345|LRK42_ARATH	677	64	677	34.9	676	357	83	346.7	7.1e-94	sp|Q9M345|LRK42_ARATH L-type lectin-domain containing receptor kinase IV.2 OS=Arabidopsis thaliana OX=3702 GN=LECRK42 PE=2 SV=1
Unigene0000385	2334	2302	326	sp|O04534|LRK51_ARATH	666	4	621	32.3	681	376	85	343.2	7.8e-93	sp|O04534|LRK51_ARATH Putative L-type lectin-domain containing receptor kinase V.1 OS=Arabidopsis thaliana OX=3702 GN=LECRK51 PE=3 SV=1
Unigene0000385	2334	2140	218	sp|Q6H7D2|SIT1_ORYSJ	674	68	668	34.6	662	351	82	335.9	1.3e-90	sp|Q6H7D2|SIT1_ORYSJ L-type lectin-domain containing receptor kinase SIT1 OS=Oryza sativa subsp. japonica OX=39947 GN=SIT1 PE=1 SV=1
Unigene0000385	2334	2209	287	sp|Q9FIF1|LRK21_ARATH	674	44	637	34.3	668	338	101	333.2	8.1e-90	sp|Q9FIF1|LRK21_ARATH Probable L-type lectin-domain containing receptor kinase II.1 OS=Arabidopsis thaliana OX=3702 GN=LECRK21 PE=2 SV=1
Unigene0000385	2334	2149	305	sp|Q9LSL5|LRK92_ARATH	675	74	642	33.5	635	336	86	320.5	5.4e-86	sp|Q9LSL5|LRK92_ARATH L-type lectin-domain containing receptor kinase IX.2 OS=Arabidopsis thaliana OX=3702 GN=LECRK92 PE=1 SV=1
Unigene0000385	2334	2140	347	sp|O49445|LRK72_ARATH	681	63	619	34.2	620	323	85	318.9	1.6e-85	sp|O49445|LRK72_ARATH Probable L-type lectin-domain containing receptor kinase VII.2 OS=Arabidopsis thaliana OX=3702 GN=LECRK72 PE=3 SV=2
Unigene0000385	2334	2317	338	sp|Q9S9U1|LRK71_ARATH	686	1	623	33	681	377	79	315.1	2.3e-84	sp|Q9S9U1|LRK71_ARATH L-type lectin-domain containing receptor kinase VII.1 OS=Arabidopsis thaliana OX=3702 GN=LECRK71 PE=2 SV=1
Unigene0000385	2334	2209	287	sp|Q9FIF0|LRK22_ARATH	694	44	657	32	671	369	87	309.7	9.6e-83	sp|Q9FIF0|LRK22_ARATH Putative L-type lectin-domain containing receptor kinase II.2 OS=Arabidopsis thaliana OX=3702 GN=LECRK22 PE=3 SV=3
Unigene0000392	639	42	479	sp|Q9LV58|MBF1C_ARATH	148	1	145	70.5	146	42	1	190.7	1.8e-47	sp|Q9LV58|MBF1C_ARATH Multiprotein-bridging factor 1c OS=Arabidopsis thaliana OX=3702 GN=MBF1C PE=1 SV=1
Unigene0000392	639	57	479	sp|Q9LXT3|MBF1B_ARATH	142	4	141	57.4	141	57	3	148.3	1.0e-34	sp|Q9LXT3|MBF1B_ARATH Multiprotein-bridging factor 1b OS=Arabidopsis thaliana OX=3702 GN=MBF1B PE=1 SV=1
Unigene0000392	639	57	479	sp|Q9SJI8|MBF1A_ARATH	142	4	141	53.2	141	63	3	139.4	4.7e-32	sp|Q9SJI8|MBF1A_ARATH Multiprotein-bridging factor 1a OS=Arabidopsis thaliana OX=3702 GN=MBF1A PE=2 SV=1
Unigene0000392	639	75	479	sp|Q6PBY3|EDF1_DANRE	146	5	134	45.3	137	66	9	96.7	3.5e-19	sp|Q6PBY3|EDF1_DANRE Endothelial differentiation-related factor 1 homolog OS=Danio rerio OX=7955 GN=edf1 PE=2 SV=1
Unigene0000392	639	75	479	sp|Q5ZMC0|EDF1_CHICK	148	5	135	45.6	136	68	6	94.7	1.3e-18	sp|Q5ZMC0|EDF1_CHICK Endothelial differentiation-related factor 1 homolog OS=Gallus gallus OX=9031 GN=EDF1 PE=2 SV=1
Unigene0000392	639	75	479	sp|Q6GPQ6|EDF1_XENLA	147	5	135	44.1	136	70	6	94.7	1.3e-18	sp|Q6GPQ6|EDF1_XENLA Endothelial differentiation-related factor 1 homolog OS=Xenopus laevis OX=8355 GN=edf1 PE=2 SV=1
Unigene0000392	639	75	479	sp|Q9JMG1|EDF1_MOUSE	148	5	135	44.9	136	69	6	93.2	3.9e-18	sp|Q9JMG1|EDF1_MOUSE Endothelial differentiation-related factor 1 OS=Mus musculus OX=10090 GN=Edf1 PE=1 SV=1
Unigene0000392	639	75	479	sp|P69736|EDF1_RAT	148	5	135	44.9	136	69	6	93.2	3.9e-18	sp|P69736|EDF1_RAT Endothelial differentiation-related factor 1 OS=Rattus norvegicus OX=10116 GN=Edf1 PE=1 SV=1
Unigene0000392	639	75	479	sp|Q3T0V7|EDF1_BOVIN	148	5	135	44.9	136	69	6	92.8	5.0e-18	sp|Q3T0V7|EDF1_BOVIN Endothelial differentiation-related factor 1 OS=Bos taurus OX=9913 GN=EDF1 PE=2 SV=1
Unigene0000392	639	75	479	sp|O60869|EDF1_HUMAN	148	5	135	44.9	136	69	6	92.8	5.0e-18	sp|O60869|EDF1_HUMAN Endothelial differentiation-related factor 1 OS=Homo sapiens OX=9606 GN=EDF1 PE=1 SV=1
Unigene0000392	639	66	479	sp|Q5A940|MBF1_CANAL	151	1	140	39.3	145	76	12	80.1	3.4e-14	sp|Q5A940|MBF1_CANAL Multiprotein-bridging factor 1 OS=Candida albicans (strain SC5314 / ATCC MYA-2876) OX=237561 GN=MBF1 PE=3 SV=1
Unigene0000392	639	66	479	sp|Q8TG23|MBF1_YARLI	152	1	140	38.6	145	77	12	73.2	4.1e-12	sp|Q8TG23|MBF1_YARLI Putative multi-protein-binding factor 1 OS=Yarrowia lipolytica (strain CLIB 122 / E 150) OX=284591 GN=MBF1 PE=3 SV=1
Unigene0000392	639	75	479	sp|Q6BXQ8|MBF1_DEBHA	150	3	139	39.4	142	74	12	72.8	5.4e-12	sp|Q6BXQ8|MBF1_DEBHA Multiprotein-bridging factor 1 OS=Debaryomyces hansenii (strain ATCC 36239 / CBS 767 / BCRC 21394 / JCM 1990 / NBRC 0083 / IGC 2968) OX=284592 GN=MBF1 PE=3 SV=1
Unigene0000392	639	75	479	sp|O94700|MBF1_SCHPO	148	3	136	39.6	139	75	9	70.1	3.5e-11	sp|O94700|MBF1_SCHPO Multiprotein-bridging factor 1 OS=Schizosaccharomyces pombe (strain 972 / ATCC 24843) OX=284812 GN=mbf1 PE=3 SV=1
Unigene0000392	639	75	479	sp|Q6FJN0|MBF1_CANGA	151	3	139	36.6	142	78	12	68.9	7.8e-11	sp|Q6FJN0|MBF1_CANGA Multiprotein-bridging factor 1 OS=Candida glabrata (strain ATCC 2001 / BCRC 20586 / JCM 3761 / NBRC 0622 / NRRL Y-65 / CBS 138) OX=284593 GN=MBF1 PE=3 SV=1
Unigene0000392	639	66	482	sp|Q752P7|MBF1_EREGS	152	1	141	35.6	146	82	12	68.6	1.0e-10	sp|Q752P7|MBF1_EREGS Multiprotein-bridging factor 1 OS=Eremothecium gossypii (strain ATCC 10895 / CBS 109.51 / FGSC 9923 / NRRL Y-1056) OX=284811 GN=MBF1 PE=3 SV=1
Unigene0000392	639	186	479	sp|P14327|VSH7_DICDI	104	6	97	48	98	45	6	68.6	1.0e-10	sp|P14327|VSH7_DICDI Vegetative-specific protein H7 OS=Dictyostelium discoideum OX=44689 GN=cinD-1 PE=2 SV=2
Unigene0000392	639	252	476	sp|O14467|MBF1_YEAST	151	64	138	48	75	39	0	64.3	1.9e-09	sp|O14467|MBF1_YEAST Multiprotein-bridging factor 1 OS=Saccharomyces cerevisiae (strain ATCC 204508 / S288c) OX=559292 GN=MBF1 PE=1 SV=2
Unigene0000392	639	75	476	sp|P0CO31|MBF1_CRYNB	150	3	136	34	141	79	14	56.2	5.2e-07	sp|P0CO31|MBF1_CRYNB Multiprotein-bridging factor 1 OS=Cryptococcus neoformans var. neoformans serotype D (strain B-3501A) OX=283643 GN=MBF1 PE=3 SV=1
Unigene0000392	639	75	476	sp|P0CO30|MBF1_CRYNJ	150	3	136	34	141	79	14	56.2	5.2e-07	sp|P0CO30|MBF1_CRYNJ Multiprotein-bridging factor 1 OS=Cryptococcus neoformans var. neoformans serotype D (strain JEC21 / ATCC MYA-565) OX=214684 GN=MBF1 PE=3 SV=1
Unigene0000401	2872	1	1293	sp|Q6YPG5|NOS_ORYSJ	547	1	425	68.2	434	126	12	545	1.7e-153	sp|Q6YPG5|NOS_ORYSJ Putative nitric oxide synthase OS=Oryza sativa subsp. japonica OX=39947 GN=Os02g0104700 PE=3 SV=1
Unigene0000401	2872	2478	2726	sp|Q6YPG5|NOS_ORYSJ	547	462	547	66.3	86	26	3	128.6	3.7e-28	sp|Q6YPG5|NOS_ORYSJ Putative nitric oxide synthase OS=Oryza sativa subsp. japonica OX=39947 GN=Os02g0104700 PE=3 SV=1
Unigene0000401	2872	121	1293	sp|Q66GP9|NOA1_ARATH	561	49	442	70.8	394	112	3	538.1	2.0e-151	sp|Q66GP9|NOA1_ARATH NO-associated protein 1, chloroplastic/mitochondrial OS=Arabidopsis thaliana OX=3702 GN=NOA1 PE=1 SV=1
Unigene0000401	2872	2478	2726	sp|Q66GP9|NOA1_ARATH	561	479	561	51.8	83	40	0	110.5	1.1e-22	sp|Q66GP9|NOA1_ARATH NO-associated protein 1, chloroplastic/mitochondrial OS=Arabidopsis thaliana OX=3702 GN=NOA1 PE=1 SV=1
Unigene0000401	2872	298	1293	sp|P54453|YQEH_BACSU	366	8	297	29.5	332	192	42	143.7	1.1e-32	sp|P54453|YQEH_BACSU Uncharacterized protein YqeH OS=Bacillus subtilis (strain 168) OX=224308 GN=yqeH PE=1 SV=1
Unigene0000411	931	56	724	sp|Q9SJ81|FLA7_ARATH	254	8	236	45.2	230	118	8	166.4	5.2e-40	sp|Q9SJ81|FLA7_ARATH Fasciclin-like arabinogalactan protein 7 OS=Arabidopsis thaliana OX=3702 GN=FLA7 PE=2 SV=1
Unigene0000411	931	53	796	sp|Q9SIL7|FLA6_ARATH	247	12	246	32.8	256	143	29	102.1	1.2e-20	sp|Q9SIL7|FLA6_ARATH Fasciclin-like arabinogalactan protein 6 OS=Arabidopsis thaliana OX=3702 GN=FLA6 PE=2 SV=2
Unigene0000411	931	44	604	sp|Q8LEE9|FLA12_ARATH	249	4	191	34.4	189	121	3	101.7	1.6e-20	sp|Q8LEE9|FLA12_ARATH Fasciclin-like arabinogalactan protein 12 OS=Arabidopsis thaliana OX=3702 GN=FLA12 PE=2 SV=2
Unigene0000411	931	38	646	sp|Q9FFH6|FLA13_ARATH	247	3	206	31.9	210	130	13	91.3	2.1e-17	sp|Q9FFH6|FLA13_ARATH Fasciclin-like arabinogalactan protein 13 OS=Arabidopsis thaliana OX=3702 GN=FLA13 PE=1 SV=1
Unigene0000411	931	32	724	sp|Q9ZWA8|FLA9_ARATH	247	3	227	29.9	234	152	12	89.7	6.2e-17	sp|Q9ZWA8|FLA9_ARATH Fasciclin-like arabinogalactan protein 9 OS=Arabidopsis thaliana OX=3702 GN=FLA9 PE=2 SV=1
Unigene0000411	931	44	784	sp|Q8LEJ6|FLA11_ARATH	246	11	240	29.8	252	150	27	88.2	1.8e-16	sp|Q8LEJ6|FLA11_ARATH Fasciclin-like arabinogalactan protein 11 OS=Arabidopsis thaliana OX=3702 GN=FLA11 PE=2 SV=2
Unigene0000411	931	35	793	sp|Q9SNC3|FLA4_ARATH	420	167	420	28	261	173	15	68.9	1.1e-10	sp|Q9SNC3|FLA4_ARATH Fasciclin-like arabinogalactan protein 4 OS=Arabidopsis thaliana OX=3702 GN=FLA4 PE=1 SV=1
Unigene0000415	508	384	91	sp|P0DKG3|OFP9_ARATH	415	298	413	42.2	116	49	18	84.7	1.1e-15	sp|P0DKG3|OFP9_ARATH Probable transcription repressor OFP9 OS=Arabidopsis thaliana OX=3702 GN=OFP9 PE=3 SV=2
Unigene0000415	508	330	106	sp|O04351|OFP2_ARATH	320	238	312	30.7	75	52	0	54.3	1.6e-06	sp|O04351|OFP2_ARATH Transcription repressor OFP2 OS=Arabidopsis thaliana OX=3702 GN=OFP2 PE=1 SV=1
Unigene0000415	508	282	106	sp|Q3EAL1|OFP6_ARATH	159	68	126	40.7	59	35	0	53.1	3.5e-06	sp|Q3EAL1|OFP6_ARATH Transcription repressor OFP6 OS=Arabidopsis thaliana OX=3702 GN=OFP6 PE=1 SV=1
Unigene0000421	250	249	121	sp|A0A0U1WZ18|PMM_DENOF	252	210	252	81.4	43	8	0	76.6	1.5e-13	sp|A0A0U1WZ18|PMM_DENOF Phosphomannomutase OS=Dendrobium officinale OX=142615 GN=PMM PE=1 SV=1
Unigene0000421	250	249	121	sp|A0A1S4A695|PMM_TOBAC	252	210	252	76.7	43	10	0	76.3	1.9e-13	sp|A0A1S4A695|PMM_TOBAC Phosphomannomutase OS=Nicotiana tabacum OX=4097 GN=PMM PE=3 SV=1
Unigene0000421	250	249	121	sp|Q1W375|PMM_NICBE	252	210	252	76.7	43	10	0	75.5	3.2e-13	sp|Q1W375|PMM_NICBE Phosphomannomutase OS=Nicotiana benthamiana OX=4100 GN=PMM PE=1 SV=1
Unigene0000421	250	249	121	sp|Q1W377|PMM_SOLLC	252	210	252	76.7	43	10	0	75.1	4.2e-13	sp|Q1W377|PMM_SOLLC Phosphomannomutase OS=Solanum lycopersicum OX=4081 GN=PMM PE=1 SV=1
Unigene0000421	250	249	142	sp|Q1W376|PMM_SOYBN	247	210	245	88.9	36	4	0	73.6	1.2e-12	sp|Q1W376|PMM_SOYBN Phosphomannomutase OS=Glycine max OX=3847 GN=PMM PE=1 SV=1
Unigene0000421	250	249	136	sp|Q259G4|PMM_ORYSI	248	211	248	78.9	38	8	0	72.8	2.1e-12	sp|Q259G4|PMM_ORYSI Phosphomannomutase OS=Oryza sativa subsp. indica OX=39946 GN=PMM PE=3 SV=1
Unigene0000421	250	249	136	sp|Q7XPW5|PMM_ORYSJ	248	211	248	78.9	38	8	0	72.8	2.1e-12	sp|Q7XPW5|PMM_ORYSJ Phosphomannomutase OS=Oryza sativa subsp. japonica OX=39947 GN=PMM PE=1 SV=2
Unigene0000421	250	249	136	sp|Q1W374|PMM_WHEAT	249	212	249	78.9	38	8	0	71.6	4.7e-12	sp|Q1W374|PMM_WHEAT Phosphomannomutase OS=Triticum aestivum OX=4565 GN=PMM PE=1 SV=1
Unigene0000421	250	249	136	sp|A0A0K9RL25|PMM_SPIOL	248	209	246	71.1	38	11	0	64.3	7.5e-10	sp|A0A0K9RL25|PMM_SPIOL Phosphomannomutase OS=Spinacia oleracea OX=3562 GN=PMM PE=1 SV=1
Unigene0000421	250	249	139	sp|O80840|PMM_ARATH	246	210	246	64.9	37	13	0	61.6	4.9e-09	sp|O80840|PMM_ARATH Phosphomannomutase OS=Arabidopsis thaliana OX=3702 GN=PMM PE=1 SV=1
Unigene0000421	250	249	145	sp|M2VWL5|PMM_GALSU	251	215	249	62.9	35	13	0	55.8	2.7e-07	sp|M2VWL5|PMM_GALSU Phosphomannomutase OS=Galdieria sulphuraria OX=130081 GN=PMM PE=1 SV=1
Unigene0000421	250	249	145	sp|Q9UTJ2|PMM_SCHPO	257	221	255	57.1	35	15	0	51.2	6.6e-06	sp|Q9UTJ2|PMM_SCHPO Phosphomannomutase OS=Schizosaccharomyces pombe (strain 972 / ATCC 24843) OX=284812 GN=pmm1 PE=2 SV=1
Unigene0000421	250	249	145	sp|Q9Z2M7|PMM2_MOUSE	242	207	241	62.9	35	13	0	50.8	8.6e-06	sp|Q9Z2M7|PMM2_MOUSE Phosphomannomutase 2 OS=Mus musculus OX=10090 GN=Pmm2 PE=1 SV=1
Unigene0000432	2541	207	2132	sp|A7XDQ9|B3GTK_ARATH	684	1	684	60.5	689	220	52	853.2	2.5e-246	sp|A7XDQ9|B3GTK_ARATH Hydroxyproline O-galactosyltransferase GALT2 OS=Arabidopsis thaliana OX=3702 GN=GALT2 PE=1 SV=1
Unigene0000432	2541	180	2132	sp|Q9LV16|B3GTJ_ARATH	681	12	681	53.7	684	270	47	720.7	2.0e-206	sp|Q9LV16|B3GTJ_ARATH Hydroxyproline O-galactosyltransferase GALT6 OS=Arabidopsis thaliana OX=3702 GN=GALT6 PE=2 SV=2
Unigene0000432	2541	207	2132	sp|Q8RX55|B3GTI_ARATH	672	6	672	52.6	681	270	53	709.5	4.5e-203	sp|Q8RX55|B3GTI_ARATH Hydroxyproline O-galactosyltransferase GALT5 OS=Arabidopsis thaliana OX=3702 GN=GALT5 PE=1 SV=1
Unigene0000432	2541	495	2132	sp|Q8GXG6|B3GTH_ARATH	673	134	673	57.8	554	212	22	672.2	8.0e-192	sp|Q8GXG6|B3GTH_ARATH Hydroxyproline O-galactosyltransferase GALT4 OS=Arabidopsis thaliana OX=3702 GN=GALT4 PE=2 SV=2
Unigene0000432	2541	342	2123	sp|Q8L7F9|B3GTF_ARATH	643	70	640	35.8	604	345	43	322.8	1.2e-86	sp|Q8L7F9|B3GTF_ARATH Beta-1,3-galactosyltransferase GALT1 OS=Arabidopsis thaliana OX=3702 GN=GALT1 PE=1 SV=1
Unigene0000432	2541	669	2123	sp|Q9ASW1|B3GTG_ARATH	619	167	618	34.6	492	275	47	292.7	1.3e-77	sp|Q9ASW1|B3GTG_ARATH Hydroxyproline O-galactosyltransferase GALT3 OS=Arabidopsis thaliana OX=3702 GN=GALT3 PE=2 SV=1
Unigene0000432	2541	1347	2120	sp|Q96L58|B3GT6_HUMAN	329	42	300	29.2	264	176	11	103.6	1.1e-20	sp|Q96L58|B3GT6_HUMAN Beta-1,3-galactosyltransferase 6 OS=Homo sapiens OX=9606 GN=B3GALT6 PE=1 SV=2
Unigene0000432	2541	1377	2081	sp|Q91Z92|B3GT6_MOUSE	325	47	283	29.5	241	160	10	100.9	7.4e-20	sp|Q91Z92|B3GT6_MOUSE Beta-1,3-galactosyltransferase 6 OS=Mus musculus OX=10090 GN=B3galt6 PE=2 SV=1
Unigene0000432	2541	1407	1949	sp|A8Y3H3|BRE2_CAEBR	365	94	284	26.9	193	127	14	67	1.2e-09	sp|A8Y3H3|BRE2_CAEBR Beta-1,3-galactosyltransferase bre-2 OS=Caenorhabditis briggsae OX=6238 GN=bre-2.1 PE=3 SV=1
Unigene0000442	405	33	404	sp|A0R757|DERI2_MYCS2	152	4	127	72.6	124	34	0	171	9.2e-42	sp|A0R757|DERI2_MYCS2 D-erythrulose-4-phosphate isomerase 2 OS=Mycolicibacterium smegmatis (strain ATCC 700084 / mc(2)155) OX=246196 GN=derI2 PE=1 SV=1
Unigene0000442	405	24	404	sp|P0CL19|RPIB_COCIM	163	7	133	63.8	127	46	0	169.9	2.1e-41	sp|P0CL19|RPIB_COCIM Putative ribose 5-phosphate isomerase OS=Coccidioides immitis (strain RS) OX=246410 GN=CIMG_07932 PE=1 SV=1
Unigene0000442	405	33	404	sp|A0QXE5|DERI1_MYCS2	153	4	126	68.5	124	38	1	169.5	2.7e-41	sp|A0QXE5|DERI1_MYCS2 D-erythrulose-4-phosphate isomerase 1 OS=Mycolicibacterium smegmatis (strain ATCC 700084 / mc(2)155) OX=246196 GN=derI1 PE=1 SV=1
Unigene0000442	405	33	395	sp|P37351|RPIB_ECOLI	149	3	120	48.8	121	59	3	102.4	4.0e-21	sp|P37351|RPIB_ECOLI Ribose-5-phosphate isomerase B OS=Escherichia coli (strain K12) OX=83333 GN=rpiB PE=1 SV=2
Unigene0000442	405	33	395	sp|Q92EU5|RPIB_LISIN	148	2	119	46.3	121	62	3	99	4.5e-20	sp|Q92EU5|RPIB_LISIN Ribose-5-P isomerase B OS=Listeria innocua serovar 6a (strain ATCC BAA-680 / CLIP 11262) OX=272626 GN=rpiB PE=1 SV=1
Unigene0000442	405	33	401	sp|P39156|YWLF_BACSU	149	2	122	43.9	123	67	2	99	4.5e-20	sp|P39156|YWLF_BACSU Putative sugar phosphate isomerase YwlF OS=Bacillus subtilis (strain 168) OX=224308 GN=ywlF PE=2 SV=1
Unigene0000442	405	33	398	sp|Q9ZB26|ERYI_BRUA2	151	2	120	47.2	123	60	5	95.9	3.8e-19	sp|Q9ZB26|ERYI_BRUA2 D-erythrulose-4-phosphate isomerase OS=Brucella abortus (strain 2308) OX=359391 GN=eryI PE=1 SV=2
Unigene0000442	405	33	398	sp|B9JN19|DERI_RHIR8	151	2	120	45.9	122	63	3	94.7	8.4e-19	sp|B9JN19|DERI_RHIR8 D-erythrulose-4-phosphate isomerase OS=Rhizobium rhizogenes (strain K84 / ATCC BAA-868) OX=311403 GN=derI PE=1 SV=1
Unigene0000442	405	36	395	sp|Q6D8V9|DERI_PECAS	152	4	121	40	120	70	2	91.7	7.1e-18	sp|Q6D8V9|DERI_PECAS D-erythrulose-4-phosphate isomerase OS=Pectobacterium atrosepticum (strain SCRI 1043 / ATCC BAA-672) OX=218491 GN=derI PE=1 SV=1
Unigene0000442	405	36	395	sp|Q97F02|LACB_CLOAB	173	3	119	37.5	120	72	3	73.6	2.0e-12	sp|Q97F02|LACB_CLOAB Galactose-6-phosphate isomerase subunit LacB OS=Clostridium acetobutylicum (strain ATCC 824 / DSM 792 / JCM 1419 / IAM 19013 / LMG 5710 / NBRC 13948 / NRRL B-527 / VKM B-1787 / 2291 / W) OX=272562 GN=lacB PE=3 SV=1
Unigene0000442	405	33	374	sp|Q4L873|LACB_STAHJ	171	2	112	40.4	114	65	3	72.4	4.5e-12	sp|Q4L873|LACB_STAHJ Galactose-6-phosphate isomerase subunit LacB OS=Staphylococcus haemolyticus (strain JCSC1435) OX=279808 GN=lacB PE=3 SV=1
Unigene0000442	405	33	374	sp|Q5HM36|LACB_STAEQ	171	2	112	39.5	114	66	3	71.2	1.0e-11	sp|Q5HM36|LACB_STAEQ Galactose-6-phosphate isomerase subunit LacB OS=Staphylococcus epidermidis (strain ATCC 35984 / RP62A) OX=176279 GN=lacB PE=3 SV=1
Unigene0000442	405	33	374	sp|Q8CRJ3|LACB_STAES	171	2	112	39.5	114	66	3	71.2	1.0e-11	sp|Q8CRJ3|LACB_STAES Galactose-6-phosphate isomerase subunit LacB OS=Staphylococcus epidermidis (strain ATCC 12228 / FDA PCI 1200) OX=176280 GN=lacB PE=3 SV=1
Unigene0000442	405	33	401	sp|J0MXJ0|SQWI_CLOS9	159	2	122	35	123	78	2	69.7	2.9e-11	sp|J0MXJ0|SQWI_CLOS9 4-deoxy-4-sulfo-D-erythrose isomerase OS=Clostridium sp. (strain MSTE9) OX=1105031 GN=sqwI PE=1 SV=1
Unigene0000442	405	33	374	sp|A7X578|LACB_STAA1	171	2	112	36	114	70	3	65.1	7.1e-10	sp|A7X578|LACB_STAA1 Galactose-6-phosphate isomerase subunit LacB OS=Staphylococcus aureus (strain Mu3 / ATCC 700698) OX=418127 GN=lacB PE=3 SV=1
Unigene0000442	405	33	374	sp|A6U3S4|LACB_STAA2	171	2	112	36	114	70	3	65.1	7.1e-10	sp|A6U3S4|LACB_STAA2 Galactose-6-phosphate isomerase subunit LacB OS=Staphylococcus aureus (strain JH1) OX=359787 GN=lacB PE=3 SV=1
Unigene0000442	405	33	374	sp|Q2FET8|LACB_STAA3	171	2	112	36	114	70	3	65.1	7.1e-10	sp|Q2FET8|LACB_STAA3 Galactose-6-phosphate isomerase subunit LacB OS=Staphylococcus aureus (strain USA300) OX=367830 GN=lacB PE=3 SV=1
Unigene0000442	405	33	374	sp|Q2G2R0|LACB_STAA8	171	2	112	36	114	70	3	65.1	7.1e-10	sp|Q2G2R0|LACB_STAA8 Galactose-6-phosphate isomerase subunit LacB OS=Staphylococcus aureus (strain NCTC 8325 / PS 47) OX=93061 GN=lacB PE=3 SV=1
Unigene0000442	405	33	374	sp|A5IUY3|LACB_STAA9	171	2	112	36	114	70	3	65.1	7.1e-10	sp|A5IUY3|LACB_STAA9 Galactose-6-phosphate isomerase subunit LacB OS=Staphylococcus aureus (strain JH9) OX=359786 GN=lacB PE=3 SV=1
Unigene0000442	405	33	374	sp|Q2YYJ4|LACB_STAAB	171	2	112	36	114	70	3	65.1	7.1e-10	sp|Q2YYJ4|LACB_STAAB Galactose-6-phosphate isomerase subunit LacB OS=Staphylococcus aureus (strain bovine RF122 / ET3-1) OX=273036 GN=lacB PE=3 SV=1
Unigene0000444	2070	195	1490	sp|Q9FME4|PP438_ARATH	521	78	519	49.5	442	213	10	425.2	1.4e-117	sp|Q9FME4|PP438_ARATH Small ribosomal subunit protein mL104 (rPPR9) OS=Arabidopsis thaliana OX=3702 GN=PNM1 PE=1 SV=1
Unigene0000447	665	664	206	sp|P0CT66|RS18A_SCHPO	152	2	151	75.2	153	35	3	235.7	5.0e-61	sp|P0CT66|RS18A_SCHPO Small ribosomal subunit protein uS13A OS=Schizosaccharomyces pombe (strain 972 / ATCC 24843) OX=284812 GN=rps1801 PE=3 SV=1
Unigene0000447	665	664	206	sp|P0CT67|RS18B_SCHPO	152	2	151	75.2	153	35	3	235.7	5.0e-61	sp|P0CT67|RS18B_SCHPO Small ribosomal subunit protein uS13B OS=Schizosaccharomyces pombe (strain 972 / ATCC 24843) OX=284812 GN=rps1802 PE=3 SV=1
Unigene0000447	665	664	206	sp|Q8ISP0|RS18_BRABE	152	2	151	71.9	153	40	3	234.6	1.1e-60	sp|Q8ISP0|RS18_BRABE Small ribosomal subunit protein uS13 OS=Branchiostoma belcheri OX=7741 GN=RPS18 PE=2 SV=1
Unigene0000447	665	640	206	sp|Q8IT98|RS18_ARGIR	152	7	151	73.1	145	39	0	233.4	2.5e-60	sp|Q8IT98|RS18_ARGIR Small ribosomal subunit protein uS13 OS=Argopecten irradians OX=31199 GN=RPS18 PE=2 SV=1
Unigene0000447	665	664	206	sp|Q8JGS9|RS18_DANRE	152	2	151	72.5	153	39	3	229.9	2.7e-59	sp|Q8JGS9|RS18_DANRE Small ribosomal subunit protein uS13 OS=Danio rerio OX=7955 GN=rps18 PE=1 SV=1
Unigene0000447	665	664	206	sp|Q90YQ5|RS18_ICTPU	152	2	151	71.9	153	40	3	229.6	3.6e-59	sp|Q90YQ5|RS18_ICTPU Small ribosomal subunit protein uS13 OS=Ictalurus punctatus OX=7998 GN=rps18 PE=2 SV=1
Unigene0000447	665	664	206	sp|Q3T0R1|RS18_BOVIN	152	2	151	71.2	153	41	3	228.4	8.0e-59	sp|Q3T0R1|RS18_BOVIN Small ribosomal subunit protein uS13 OS=Bos taurus OX=9913 GN=RPS18 PE=2 SV=3
Unigene0000447	665	664	206	sp|Q5TJE9|RS18_CANLF	152	2	151	71.2	153	41	3	228.4	8.0e-59	sp|Q5TJE9|RS18_CANLF Small ribosomal subunit protein uS13 OS=Canis lupus familiaris OX=9615 GN=RPS18 PE=1 SV=3
Unigene0000447	665	664	206	sp|A5JST6|RS18_CAPHI	152	2	151	71.2	153	41	3	228.4	8.0e-59	sp|A5JST6|RS18_CAPHI Small ribosomal subunit protein uS13 OS=Capra hircus OX=9925 GN=RPS18 PE=2 SV=1
Unigene0000447	665	664	206	sp|P62269|RS18_HUMAN	152	2	151	71.2	153	41	3	228.4	8.0e-59	sp|P62269|RS18_HUMAN Small ribosomal subunit protein uS13 OS=Homo sapiens OX=9606 GN=RPS18 PE=1 SV=3
Unigene0000447	665	664	206	sp|P62270|RS18_MOUSE	152	2	151	71.2	153	41	3	228.4	8.0e-59	sp|P62270|RS18_MOUSE Small ribosomal subunit protein uS13 OS=Mus musculus OX=10090 GN=Rps18 PE=1 SV=3
Unigene0000447	665	664	206	sp|P62272|RS18_PIG	152	2	151	71.2	153	41	3	228.4	8.0e-59	sp|P62272|RS18_PIG Small ribosomal subunit protein uS13 OS=Sus scrofa OX=9823 GN=RPS18 PE=1 SV=3
Unigene0000447	665	664	206	sp|G1TPG3|RS18_RABIT	152	2	151	71.2	153	41	3	228.4	8.0e-59	sp|G1TPG3|RS18_RABIT Small ribosomal subunit protein uS13 OS=Oryctolagus cuniculus OX=9986 GN=RPS18 PE=1 SV=1
Unigene0000447	665	664	206	sp|P62271|RS18_RAT	152	2	151	71.2	153	41	3	228.4	8.0e-59	sp|P62271|RS18_RAT Small ribosomal subunit protein uS13 OS=Rattus norvegicus OX=10116 GN=Rps18 PE=1 SV=3
Unigene0000447	665	664	206	sp|Q962R1|RS18_SPOFR	152	2	151	71.2	153	41	3	227.6	1.4e-58	sp|Q962R1|RS18_SPOFR Small ribosomal subunit protein uS13 OS=Spodoptera frugiperda OX=7108 GN=RpS18 PE=2 SV=1
Unigene0000447	665	643	206	sp|P34788|RS18_ARATH	152	6	151	73.3	146	39	0	227.3	1.8e-58	sp|P34788|RS18_ARATH Small ribosomal subunit protein uS13z/uS13y/uS13x OS=Arabidopsis thaliana OX=3702 GN=RPS18A PE=1 SV=1
Unigene0000447	665	664	206	sp|P41094|RS18_DROME	152	2	151	69.3	153	44	3	219.9	2.8e-56	sp|P41094|RS18_DROME Small ribosomal subunit protein uS13 OS=Drosophila melanogaster OX=7227 GN=RpS18 PE=1 SV=1
Unigene0000447	665	634	236	sp|A0A1D8PQQ5|RS18B_CANAL	145	11	143	78.2	133	29	0	218.8	6.3e-56	sp|A0A1D8PQQ5|RS18B_CANAL Small ribosomal subunit protein uS13 OS=Candida albicans (strain SC5314 / ATCC MYA-2876) OX=237561 GN=RPS18 PE=1 SV=1
Unigene0000447	665	634	233	sp|P0CX55|RS18A_YEAST	146	11	144	76.9	134	31	0	215.7	5.4e-55	sp|P0CX55|RS18A_YEAST Small ribosomal subunit protein uS13A OS=Saccharomyces cerevisiae (strain ATCC 204508 / S288c) OX=559292 GN=RPS18A PE=1 SV=1
Unigene0000447	665	634	233	sp|P0CX56|RS18B_YEAST	146	11	144	76.9	134	31	0	215.7	5.4e-55	sp|P0CX56|RS18B_YEAST Small ribosomal subunit protein uS13B OS=Saccharomyces cerevisiae (strain ATCC 204508 / S288c) OX=559292 GN=RPS18B PE=1 SV=1
Unigene0000456	836	1	489	sp|Q9FMR0|PER60_ARATH	331	76	210	48.5	165	53	32	142.9	5.6e-33	sp|Q9FMR0|PER60_ARATH Peroxidase 60 OS=Arabidopsis thaliana OX=3702 GN=PER60 PE=1 SV=1
Unigene0000456	836	1	474	sp|Q93V93|PER44_ARATH	310	70	201	46	161	55	32	122.1	1.0e-26	sp|Q93V93|PER44_ARATH Peroxidase 44 OS=Arabidopsis thaliana OX=3702 GN=PER44 PE=2 SV=1
Unigene0000456	836	1	486	sp|P22196|PER2_ARAHY	330	80	212	45.4	163	58	31	120.6	3.0e-26	sp|P22196|PER2_ARAHY Cationic peroxidase 2 OS=Arachis hypogaea OX=3818 GN=PNC2 PE=2 SV=1
Unigene0000456	836	1	489	sp|Q9FLV5|PER61_ARATH	340	85	217	42.9	163	63	30	120.6	3.0e-26	sp|Q9FLV5|PER61_ARATH Probable peroxidase 61 OS=Arabidopsis thaliana OX=3702 GN=PER61 PE=3 SV=1
Unigene0000456	836	1	486	sp|Q96511|PER69_ARATH	331	85	216	43.8	162	61	30	120.2	3.9e-26	sp|Q96511|PER69_ARATH Peroxidase 69 OS=Arabidopsis thaliana OX=3702 GN=PER69 PE=1 SV=1
Unigene0000456	836	1	480	sp|Q9FKA4|PER62_ARATH	319	73	204	41.6	161	64	30	115.9	7.3e-25	sp|Q9FKA4|PER62_ARATH Peroxidase 62 OS=Arabidopsis thaliana OX=3702 GN=PER62 PE=2 SV=1
Unigene0000456	836	1	489	sp|Q9FMI7|PER70_ARATH	330	82	214	41.1	163	66	30	115.2	1.2e-24	sp|Q9FMI7|PER70_ARATH Peroxidase 70 OS=Arabidopsis thaliana OX=3702 GN=PER70 PE=2 SV=1
Unigene0000456	836	495	824	sp|Q9FMI7|PER70_ARATH	330	219	330	33.3	114	70	6	59.3	8.1e-08	sp|Q9FMI7|PER70_ARATH Peroxidase 70 OS=Arabidopsis thaliana OX=3702 GN=PER70 PE=2 SV=1
Unigene0000456	836	1	486	sp|O22862|PER26_ARATH	335	85	216	40.7	162	66	30	114.4	2.1e-24	sp|O22862|PER26_ARATH Probable peroxidase 26 OS=Arabidopsis thaliana OX=3702 GN=PER26 PE=2 SV=2
Unigene0000456	836	501	824	sp|O22862|PER26_ARATH	335	224	335	37.5	112	66	4	73.2	5.4e-12	sp|O22862|PER26_ARATH Probable peroxidase 26 OS=Arabidopsis thaliana OX=3702 GN=PER26 PE=2 SV=2
Unigene0000456	836	1	474	sp|Q9LNL0|PER8_ARATH	310	70	201	44.1	161	58	32	113.2	4.7e-24	sp|Q9LNL0|PER8_ARATH Peroxidase 8 OS=Arabidopsis thaliana OX=3702 GN=PER8 PE=2 SV=1
Unigene0000456	836	1	483	sp|Q43735|PER27_ARATH	321	74	206	38.7	163	68	32	111.3	1.8e-23	sp|Q43735|PER27_ARATH Peroxidase 27 OS=Arabidopsis thaliana OX=3702 GN=PER27 PE=1 SV=1
Unigene0000456	836	1	480	sp|Q43387|PER71_ARATH	328	83	213	42.2	161	62	31	111.3	1.8e-23	sp|Q43387|PER71_ARATH Peroxidase 71 OS=Arabidopsis thaliana OX=3702 GN=PER71 PE=1 SV=1
Unigene0000456	836	1	483	sp|O80822|PER25_ARATH	328	77	208	42	162	63	31	110.5	3.1e-23	sp|O80822|PER25_ARATH Peroxidase 25 OS=Arabidopsis thaliana OX=3702 GN=PER25 PE=2 SV=2
Unigene0000456	836	1	486	sp|A7QEU4|PER5_VITVI	329	76	213	40.5	168	64	36	109.8	5.2e-23	sp|A7QEU4|PER5_VITVI Peroxidase 5 OS=Vitis vinifera OX=29760 GN=GSVIVT00037159001 PE=1 SV=2
Unigene0000456	836	1	492	sp|Q9SUT2|PER39_ARATH	326	73	212	38.2	170	69	36	107.1	3.4e-22	sp|Q9SUT2|PER39_ARATH Peroxidase 39 OS=Arabidopsis thaliana OX=3702 GN=PER39 PE=1 SV=1
Unigene0000456	836	1	483	sp|P37834|PER1_ORYSJ	326	72	206	39.4	165	66	34	105.9	7.5e-22	sp|P37834|PER1_ORYSJ Peroxidase 1 OS=Oryza sativa subsp. japonica OX=39947 GN=PRX74 PE=2 SV=2
Unigene0000456	836	1	486	sp|Q9LT91|PER66_ARATH	322	74	209	38	166	69	34	104.8	1.7e-21	sp|Q9LT91|PER66_ARATH Peroxidase 66 OS=Arabidopsis thaliana OX=3702 GN=PER66 PE=2 SV=1
Unigene0000456	836	1	486	sp|Q43872|PER64_ARATH	317	71	206	37.3	166	70	34	103.6	3.7e-21	sp|Q43872|PER64_ARATH Peroxidase 64 OS=Arabidopsis thaliana OX=3702 GN=PER64 PE=1 SV=1
Unigene0000456	836	1	483	sp|Q42517|PERN_ARMRU	327	78	210	41.1	163	64	32	102.1	1.1e-20	sp|Q42517|PERN_ARMRU Peroxidase N OS=Armoracia rusticana OX=3704 GN=HRPN PE=2 SV=1
Unigene0000456	836	1	483	sp|Q39034|PER59_ARATH	328	78	210	41.7	163	63	32	101.3	1.9e-20	sp|Q39034|PER59_ARATH Peroxidase 59 OS=Arabidopsis thaliana OX=3702 GN=PER59 PE=1 SV=2
Unigene0000456	836	1	483	sp|O23044|PER3_ARATH	326	74	208	35.2	165	73	34	100.5	3.2e-20	sp|O23044|PER3_ARATH Peroxidase 3 OS=Arabidopsis thaliana OX=3702 GN=PER3 PE=2 SV=1
Unigene0000459	325	186	4	sp|Q9LZN2|PILS6_ARATH	431	6	57	57.4	61	17	9	63.9	1.3e-09	sp|Q9LZN2|PILS6_ARATH Protein PIN-LIKES 6 OS=Arabidopsis thaliana OX=3702 GN=PILS6 PE=2 SV=1
Unigene0000460	2074	1827	223	sp|Q9FDY4|NPR1_ORYSJ	582	29	582	64.2	556	176	23	669.1	5.5e-191	sp|Q9FDY4|NPR1_ORYSJ BTB/POZ domain and ankyrin repeat-containing protein NPR1 OS=Oryza sativa subsp. japonica OX=39947 GN=NPR1 PE=1 SV=1
Unigene0000460	2074	1821	223	sp|Q5D0W8|NPR1_ORYSI	582	31	582	64.3	555	173	25	666.8	2.7e-190	sp|Q5D0W8|NPR1_ORYSI BTB/POZ domain and ankyrin repeat-containing protein NPR1 OS=Oryza sativa subsp. indica OX=39946 GN=NPR1 PE=1 SV=1
Unigene0000460	2074	1848	247	sp|P93002|NPR1_ARATH	593	35	575	51.5	546	248	17	521.5	1.4e-146	sp|P93002|NPR1_ARATH Regulatory protein NPR1 OS=Arabidopsis thaliana OX=3702 GN=NPR1 PE=1 SV=1
Unigene0000460	2074	1833	274	sp|Q9SZI3|NPR2_ARATH	600	41	564	51.4	529	243	14	495.4	1.1e-138	sp|Q9SZI3|NPR2_ARATH Regulatory protein NPR2 OS=Arabidopsis thaliana OX=3702 GN=NPR2 PE=1 SV=1
Unigene0000460	2074	1842	247	sp|E7BQV0|NPR1_MALHU	586	33	572	46.5	544	275	16	443	6.5e-123	sp|E7BQV0|NPR1_MALHU BTB/POZ domain and ankyrin repeat-containing protein NPR1 OS=Malus hupehensis OX=106556 GN=NPR1 PE=2 SV=2
Unigene0000460	2074	1824	253	sp|Q0JJ01|NPR2_ORYSJ	635	74	622	44.2	556	271	39	407.1	3.9e-112	sp|Q0JJ01|NPR2_ORYSJ BTB/POZ domain and ankyrin repeat-containing protein NPR2 OS=Oryza sativa subsp. japonica OX=39947 GN=NPR2 PE=1 SV=1
Unigene0000460	2074	1842	232	sp|Q8L746|NPR3_ARATH	586	31	579	42.3	551	302	16	387.9	2.5e-106	sp|Q8L746|NPR3_ARATH Regulatory protein NPR3 OS=Arabidopsis thaliana OX=3702 GN=NPR3 PE=1 SV=1
Unigene0000460	2074	1812	256	sp|Q5ICL9|NPR4_ARATH	574	35	561	43.1	536	279	26	385.6	1.2e-105	sp|Q5ICL9|NPR4_ARATH Regulatory protein NPR4 OS=Arabidopsis thaliana OX=3702 GN=NPR4 PE=1 SV=1
Unigene0000460	2074	1830	247	sp|Q75HA6|NPR3_ORYSJ	589	23	569	42.9	557	279	39	367.9	2.6e-100	sp|Q75HA6|NPR3_ORYSJ BTB/POZ domain and ankyrin repeat-containing protein NPR3 OS=Oryza sativa subsp. japonica OX=39947 GN=NPR3 PE=1 SV=1
Unigene0000460	2074	1758	757	sp|Q9M1I7|NPR6_ARATH	467	26	386	31.6	364	216	33	160.2	8.4e-38	sp|Q9M1I7|NPR6_ARATH Regulatory protein NPR6 OS=Arabidopsis thaliana OX=3702 GN=NPR6 PE=1 SV=1
Unigene0000460	2074	1818	757	sp|A0A072VIM5|NOOT2_MEDTR	492	5	387	31.5	387	228	37	158.7	2.4e-37	sp|A0A072VIM5|NOOT2_MEDTR BTB/POZ domain and ankyrin repeat-containing protein NOOT2 OS=Medicago truncatula OX=3880 GN=NOOT2 PE=2 SV=1
Unigene0000460	2074	1818	757	sp|G8GTN7|COCH_PEA	483	5	388	31.7	388	227	38	156.8	9.2e-37	sp|G8GTN7|COCH_PEA BTB/POZ domain and ankyrin repeat-containing protein COCH OS=Pisum sativum OX=3888 GN=COCH PE=2 SV=1
Unigene0000460	2074	1818	757	sp|Q9ZVC2|NPR5_ARATH	491	6	393	30.9	392	229	42	154.1	6.0e-36	sp|Q9ZVC2|NPR5_ARATH Regulatory protein NPR5 OS=Arabidopsis thaliana OX=3702 GN=NPR5 PE=1 SV=1
Unigene0000460	2074	1818	757	sp|A0A0K0PU92|NBCL_LUPAN	486	5	396	30.6	396	229	46	153.7	7.8e-36	sp|A0A0K0PU92|NBCL_LUPAN BTB/POZ domain and ankyrin repeat-containing protein NBCL OS=Lupinus angustifolius OX=3871 GN=NBCL PE=1 SV=1
Unigene0000460	2074	1818	757	sp|Q2HW56|NOOT1_MEDTR	482	5	388	31.7	388	227	38	153.7	7.8e-36	sp|Q2HW56|NOOT1_MEDTR BTB/POZ domain and ankyrin repeat-containing protein NOOT1 OS=Medicago truncatula OX=3880 GN=NOOT1 PE=2 SV=1
Unigene0000460	2074	1818	757	sp|S4VGD0|NBCL_LUPLU	486	5	396	30.6	396	229	46	153.3	1.0e-35	sp|S4VGD0|NBCL_LUPLU BTB/POZ domain and ankyrin repeat-containing protein BOP OS=Lupinus luteus OX=3873 GN=BOP PE=2 SV=1
Unigene0000460	2074	1818	757	sp|G3LSH3|NBCL_LOTJA	483	5	393	31.3	393	227	43	152.5	1.7e-35	sp|G3LSH3|NBCL_LOTJA BTB/POZ domain and ankyrin repeat-containing protein NBCL OS=Lotus japonicus OX=34305 GN=NBCL PE=1 SV=1
Unigene0000460	2074	1818	757	sp|Q2RAQ5|NH51_ORYSJ	494	5	413	29.9	415	224	67	144.1	6.2e-33	sp|Q2RAQ5|NH51_ORYSJ BTB/POZ domain and ankyrin repeat-containing protein NH5.1 OS=Oryza sativa subsp. japonica OX=39947 GN=NH5.1 PE=1 SV=1
Unigene0000460	2074	1758	757	sp|A2CIR7|NPR5_ORYSJ	506	22	417	30.6	399	209	68	142.9	1.4e-32	sp|A2CIR7|NPR5_ORYSJ BTB/POZ domain and ankyrin repeat-containing protein NPR5 OS=Oryza sativa subsp. japonica OX=39947 GN=NPR5 PE=1 SV=1
Unigene0000460	2074	1818	757	sp|Q2QXZ2|NH52_ORYSJ	494	5	414	29.6	416	225	68	141.7	3.1e-32	sp|Q2QXZ2|NH52_ORYSJ BTB/POZ domain and ankyrin repeat-containing protein NH5.2 OS=Oryza sativa subsp. japonica OX=39947 GN=NH5.2 PE=1 SV=1
Unigene0000466	290	257	3	sp|O14036|SMD2_SCHPO	115	3	87	69.4	85	26	0	126.7	1.4e-28	sp|O14036|SMD2_SCHPO Small nuclear ribonucleoprotein Sm D2 OS=Schizosaccharomyces pombe (strain 972 / ATCC 24843) OX=284812 GN=smd2 PE=1 SV=1
Unigene0000466	290	251	6	sp|Q9VI10|SMD2_DROME	119	3	84	67.1	82	27	0	115.9	2.5e-25	sp|Q9VI10|SMD2_DROME Probable small nuclear ribonucleoprotein Sm D2 OS=Drosophila melanogaster OX=7227 GN=SmD2 PE=1 SV=1
Unigene0000466	290	254	6	sp|Q3SZF8|SMD2_BOVIN	118	3	84	66.3	83	27	1	113.2	1.6e-24	sp|Q3SZF8|SMD2_BOVIN Small nuclear ribonucleoprotein Sm D2 OS=Bos taurus OX=9913 GN=SNRPD2 PE=3 SV=1
Unigene0000466	290	254	6	sp|P62316|SMD2_HUMAN	118	3	84	66.3	83	27	1	113.2	1.6e-24	sp|P62316|SMD2_HUMAN Small nuclear ribonucleoprotein Sm D2 OS=Homo sapiens OX=9606 GN=SNRPD2 PE=1 SV=1
Unigene0000466	290	254	6	sp|P62317|SMD2_MOUSE	118	3	84	66.3	83	27	1	113.2	1.6e-24	sp|P62317|SMD2_MOUSE Small nuclear ribonucleoprotein Sm D2 OS=Mus musculus OX=10090 GN=Snrpd2 PE=1 SV=1
Unigene0000466	290	248	6	sp|Q18786|SMD2_CAEEL	118	5	85	65.4	81	28	0	112.5	2.8e-24	sp|Q18786|SMD2_CAEEL Probable small nuclear ribonucleoprotein Sm D2 OS=Caenorhabditis elegans OX=6239 GN=snr-4 PE=1 SV=1
Unigene0000466	290	257	33	sp|Q06217|SMD2_YEAST	110	4	78	56	75	33	0	95.5	3.5e-19	sp|Q06217|SMD2_YEAST Small nuclear ribonucleoprotein Sm D2 OS=Saccharomyces cerevisiae (strain ATCC 204508 / S288c) OX=559292 GN=SMD2 PE=1 SV=2
Unigene0000466	290	188	6	sp|Q54NC5|SMD2_DICDI	112	16	76	63.9	61	22	0	87	1.2e-16	sp|Q54NC5|SMD2_DICDI Probable small nuclear ribonucleoprotein Sm D2 OS=Dictyostelium discoideum OX=44689 GN=snrpd2 PE=3 SV=1
Unigene0000485	3277	2484	1252	sp|Q9SZL8|FRS5_ARATH	788	236	634	28.1	441	245	72	147.5	8.9e-34	sp|Q9SZL8|FRS5_ARATH Protein FAR1-RELATED SEQUENCE 5 OS=Arabidopsis thaliana OX=3702 GN=FRS5 PE=1 SV=1
Unigene0000485	3277	2430	1288	sp|Q3EBQ3|FRS2_ARATH	807	176	551	25.5	416	235	75	102.8	2.5e-20	sp|Q3EBQ3|FRS2_ARATH Protein FAR1-RELATED SEQUENCE 2 OS=Arabidopsis thaliana OX=3702 GN=FRS2 PE=1 SV=1
Unigene0000486	5307	5019	3757	sp|P0DKG9|NRT21_ORYSJ	533	26	513	50.8	504	149	99	432.2	2.9e-119	sp|P0DKG9|NRT21_ORYSJ High-affinity nitrate transporter 2.1 OS=Oryza sativa subsp. japonica OX=39947 GN=NRT2.1 PE=1 SV=1
Unigene0000486	5307	5019	3757	sp|P0DKH0|NRT22_ORYSJ	533	26	513	50.8	504	149	99	432.2	2.9e-119	sp|P0DKH0|NRT22_ORYSJ High-affinity nitrate transporter 2.2 OS=Oryza sativa subsp. japonica OX=39947 GN=NRT2.2 PE=1 SV=1
Unigene0000486	5307	4992	3757	sp|Q9FJH8|NRT24_ARATH	527	30	515	47.9	489	175	80	393.7	1.1e-107	sp|Q9FJH8|NRT24_ARATH High affinity nitrate transporter 2.4 OS=Arabidopsis thaliana OX=3702 GN=NRT2.4 PE=2 SV=1
Unigene0000486	5307	4974	3757	sp|O82811|NRT21_ARATH	530	36	515	46.4	494	163	102	385.2	4.1e-105	sp|O82811|NRT21_ARATH High-affinity nitrate transporter 2.1 OS=Arabidopsis thaliana OX=3702 GN=NRT2.1 PE=1 SV=1
Unigene0000486	5307	4968	3751	sp|Q9LMZ9|NRT22_ARATH	522	36	514	45.2	482	185	79	369.8	1.8e-100	sp|Q9LMZ9|NRT22_ARATH High-affinity nitrate transporter 2.2 OS=Arabidopsis thaliana OX=3702 GN=NRT2.2 PE=2 SV=1
Unigene0000486	5307	4989	3757	sp|Q9LXH0|NRT26_ARATH	542	42	525	45	496	176	97	363.2	1.7e-98	sp|Q9LXH0|NRT26_ARATH High affinity nitrate transporter 2.6 OS=Arabidopsis thaliana OX=3702 GN=NRT2.6 PE=1 SV=1
Unigene0000486	5307	5019	3757	sp|Q9FJH7|NRT23_ARATH	539	29	522	43.5	506	189	97	359	3.1e-97	sp|Q9FJH7|NRT23_ARATH High affinity nitrate transporter 2.3 OS=Arabidopsis thaliana OX=3702 GN=NRT2.3 PE=1 SV=1
Unigene0000486	5307	5022	3760	sp|Q94JG1|NRT23_ORYSJ	516	6	495	40.6	508	197	105	309.7	2.2e-82	sp|Q94JG1|NRT23_ORYSJ High-affinity nitrate transporter 2.3 OS=Oryza sativa subsp. japonica OX=39947 GN=NRT2.3 PE=1 SV=1
Unigene0000486	5307	4968	3754	sp|Q9LPV5|NRT25_ARATH	502	20	496	38.4	497	194	112	292.4	3.6e-77	sp|Q9LPV5|NRT25_ARATH High affinity nitrate transporter 2.5 OS=Arabidopsis thaliana OX=3702 GN=NRT2.5 PE=1 SV=1
Unigene0000486	5307	4995	3757	sp|Q39609|NRT22_CHLRE	513	1	489	32.1	502	239	102	198.7	5.4e-49	sp|Q39609|NRT22_CHLRE Nitrate transporter 2.2 OS=Chlamydomonas reinhardtii OX=3055 GN=NRT2.2 PE=2 SV=2
Unigene0000486	5307	4983	3757	sp|Q39608|NRT21_CHLRE	547	17	504	32.5	501	233	105	197.6	1.2e-48	sp|Q39608|NRT21_CHLRE Nitrate transporter 2.1 OS=Chlamydomonas reinhardtii OX=3055 GN=NRT2.1 PE=2 SV=1
Unigene0000486	5307	4989	3844	sp|Q9LYK2|NRT27_ARATH	493	8	467	30.6	471	227	100	172.6	4.2e-41	sp|Q9LYK2|NRT27_ARATH High affinity nitrate transporter 2.7 OS=Arabidopsis thaliana OX=3702 GN=NRT2.7 PE=2 SV=1
Unigene0000486	5307	4602	3862	sp|A2ZU80|NRT24_ORYSJ	485	212	466	30	273	147	44	98.6	7.6e-19	sp|A2ZU80|NRT24_ORYSJ Probable high-affinity nitrate transporter 2.4 OS=Oryza sativa subsp. japonica OX=39947 GN=NRT2.4 PE=2 SV=2
Unigene0000497	405	160	47	sp|Q38872|CDPK6_ARATH	544	61	100	70	40	10	2	61.2	1.0e-08	sp|Q38872|CDPK6_ARATH Calcium-dependent protein kinase 6 OS=Arabidopsis thaliana OX=3702 GN=CPK6 PE=1 SV=1
Unigene0000497	405	160	47	sp|Q38871|CDPK5_ARATH	556	73	112	67.5	40	11	2	57.8	1.1e-07	sp|Q38871|CDPK5_ARATH Calcium-dependent protein kinase 5 OS=Arabidopsis thaliana OX=3702 GN=CPK5 PE=2 SV=1
Unigene0000497	405	124	47	sp|A5A7I8|CDPK5_SOLTU	535	60	87	85.7	28	2	2	52.8	3.7e-06	sp|A5A7I8|CDPK5_SOLTU Calcium-dependent protein kinase 5 OS=Solanum tuberosum OX=4113 GN=CPK5 PE=2 SV=1
Unigene0000499	306	3	305	sp|P29197|CH60A_ARATH	577	162	262	92.1	101	8	0	185.3	3.6e-46	sp|P29197|CH60A_ARATH Chaperonin CPN60, mitochondrial OS=Arabidopsis thaliana OX=3702 GN=CPN60 PE=1 SV=2
Unigene0000499	306	3	305	sp|Q05046|CH62_CUCMA	575	163	263	92.1	101	8	0	184.5	6.1e-46	sp|Q05046|CH62_CUCMA Chaperonin CPN60-2, mitochondrial OS=Cucurbita maxima OX=3661 GN=CPN60-2 PE=1 SV=1
Unigene0000499	306	3	305	sp|Q8L7B5|CH60B_ARATH	585	163	263	92.1	101	8	0	183	1.8e-45	sp|Q8L7B5|CH60B_ARATH Chaperonin CPN60-like 1, mitochondrial OS=Arabidopsis thaliana OX=3702 GN=At2g33210 PE=1 SV=1
Unigene0000499	306	3	305	sp|Q05045|CH61_CUCMA	575	163	263	91.1	101	9	0	182.6	2.3e-45	sp|Q05045|CH61_CUCMA Chaperonin CPN60-1, mitochondrial OS=Cucurbita maxima OX=3661 GN=CPN60-1 PE=1 SV=1
Unigene0000499	306	3	305	sp|P29185|CH61_MAIZE	577	165	265	87.1	101	13	0	175.3	3.7e-43	sp|P29185|CH61_MAIZE Chaperonin CPN60-1, mitochondrial OS=Zea mays OX=4577 GN=CPN60I PE=1 SV=2
Unigene0000499	306	3	305	sp|Q43298|CH62_MAIZE	576	165	265	86.1	101	14	0	173.3	1.4e-42	sp|Q43298|CH62_MAIZE Chaperonin CPN60-2, mitochondrial OS=Zea mays OX=4577 GN=CPN60II PE=2 SV=1
Unigene0000499	306	3	305	sp|P35480|CH60_BRANA	587	166	265	86.1	101	13	1	168.3	4.5e-41	sp|P35480|CH60_BRANA Chaperonin CPN60, mitochondrial OS=Brassica napus OX=3708 PE=2 SV=1
Unigene0000499	306	3	305	sp|Q93ZM7|CH60C_ARATH	572	162	262	80.2	101	20	0	161	7.2e-39	sp|Q93ZM7|CH60C_ARATH Chaperonin CPN60-like 2, mitochondrial OS=Arabidopsis thaliana OX=3702 GN=At3g13860 PE=1 SV=2
Unigene0000499	306	6	305	sp|B1LVA0|CH60_METRJ	546	133	232	67	100	33	0	139	2.9e-32	sp|B1LVA0|CH60_METRJ Chaperonin GroEL OS=Methylobacterium radiotolerans (strain ATCC 27329 / DSM 1819 / JCM 2831 / NBRC 15690 / NCIMB 10815 / 0-1) OX=426355 GN=groEL PE=3 SV=1
Unigene0000499	306	21	299	sp|O74261|HSP60_CANAL	566	154	246	73.1	93	25	0	137.5	8.6e-32	sp|O74261|HSP60_CANAL Heat shock protein 60, mitochondrial OS=Candida albicans (strain SC5314 / ATCC MYA-2876) OX=237561 GN=HSP60 PE=3 SV=1
Unigene0000499	306	3	305	sp|P35471|CH605_RHIME	542	132	232	67.3	101	33	0	136.3	1.9e-31	sp|P35471|CH605_RHIME Chaperonin GroEL 5 OS=Rhizobium meliloti (strain 1021) OX=266834 GN=groEL5 PE=2 SV=2
Unigene0000499	306	3	305	sp|A6U901|CH603_SINMW	542	132	232	66.3	101	34	0	135.6	3.3e-31	sp|A6U901|CH603_SINMW Chaperonin GroEL 3 OS=Sinorhizobium medicae (strain WSM419) OX=366394 GN=groEL3 PE=3 SV=1
Unigene0000499	306	3	305	sp|Q2KAU2|CH602_RHIEC	542	132	232	65.3	101	35	0	135.2	4.2e-31	sp|Q2KAU2|CH602_RHIEC Chaperonin GroEL 2 OS=Rhizobium etli (strain ATCC 51251 / DSM 11541 / JCM 21823 / NBRC 15573 / CFN 42) OX=347834 GN=groEL2 PE=3 SV=1
Unigene0000499	306	6	299	sp|B1ZAU5|CH60_METPB	546	133	230	65.3	98	34	0	135.2	4.2e-31	sp|B1ZAU5|CH60_METPB Chaperonin GroEL OS=Methylorubrum populi (strain ATCC BAA-705 / NCIMB 13946 / BJ001) OX=441620 GN=groEL PE=3 SV=1
Unigene0000499	306	3	299	sp|Q09864|HSP60_SCHPO	582	163	261	66.7	99	33	0	134.8	5.5e-31	sp|Q09864|HSP60_SCHPO Heat shock protein 60, mitochondrial OS=Schizosaccharomyces pombe (strain 972 / ATCC 24843) OX=284812 GN=hsp60 PE=1 SV=1
Unigene0000499	306	3	305	sp|B6IU98|CH60_RHOCS	546	132	232	63.4	101	37	0	134	9.5e-31	sp|B6IU98|CH60_RHOCS Chaperonin GroEL OS=Rhodospirillum centenum (strain ATCC 51521 / SW) OX=414684 GN=groEL PE=3 SV=1
Unigene0000499	306	12	305	sp|Q11LG4|CH601_CHESB	544	135	232	66.3	98	33	0	133.7	1.2e-30	sp|Q11LG4|CH601_CHESB Chaperonin GroEL 1 OS=Chelativorans sp. (strain BNC1) OX=266779 GN=groEL1 PE=3 SV=1
Unigene0000499	306	3	299	sp|P0CAT9|CH60_CAUVC	547	132	230	62.6	99	37	0	133.3	1.6e-30	sp|P0CAT9|CH60_CAUVC Chaperonin GroEL OS=Caulobacter vibrioides (strain ATCC 19089 / CIP 103742 / CB 15) OX=190650 GN=groEL PE=3 SV=1
Unigene0000499	306	3	299	sp|B8H163|CH60_CAUVN	547	132	230	62.6	99	37	0	133.3	1.6e-30	sp|B8H163|CH60_CAUVN Chaperonin GroEL OS=Caulobacter vibrioides (strain NA1000 / CB15N) OX=565050 GN=groEL PE=2 SV=1
Unigene0000499	306	3	305	sp|Q98IH9|CH602_RHILO	542	132	232	62.4	101	38	0	132.9	2.1e-30	sp|Q98IH9|CH602_RHILO Chaperonin GroEL 2 OS=Mesorhizobium japonicum (strain LMG 29417 / CECT 9101 / MAFF 303099) OX=266835 GN=groEL2 PE=3 SV=1
Unigene0000504	329	2	328	sp|I1RNL0|C9MT2_GIBZE	521	63	171	65.1	109	38	0	159.8	1.7e-38	sp|I1RNL0|C9MT2_GIBZE Sphingolipid C9-methyltransferase 2 OS=Gibberella zeae (strain ATCC MYA-4620 / CBS 123657 / FGSC 9075 / NRRL 31084 / PH-1) OX=229533 GN=MT2 PE=3 SV=1
Unigene0000504	329	14	328	sp|A0A1U8QNM5|SMTB_EMENI	510	69	173	64.8	105	37	0	156.8	1.5e-37	sp|A0A1U8QNM5|SMTB_EMENI Sphingolipid C9-methyltransferase B OS=Emericella nidulans (strain FGSC A4 / ATCC 38163 / CBS 112.46 / NRRL 194 / M139) OX=227321 GN=smtB PE=3 SV=1
Unigene0000504	329	17	328	sp|A0A1U8QYZ5|SMTA_EMENI	517	66	169	65.4	104	36	0	151.8	4.7e-36	sp|A0A1U8QYZ5|SMTA_EMENI Sphingolipid C9-methyltransferase A OS=Emericella nidulans (strain FGSC A4 / ATCC 38163 / CBS 112.46 / NRRL 194 / M139) OX=227321 GN=smtA PE=3 SV=1
Unigene0000504	329	14	328	sp|I1RJD6|C9MT1_GIBZE	513	70	174	59	105	43	0	144.1	9.8e-34	sp|I1RJD6|C9MT1_GIBZE Sphingolipid C9-methyltransferase 1 OS=Gibberella zeae (strain ATCC MYA-4620 / CBS 123657 / FGSC 9075 / NRRL 31084 / PH-1) OX=229533 GN=MT1 PE=3 SV=1
Unigene0000504	329	5	328	sp|C4R7Z3|C9MT_KOMPG	489	41	148	59.3	108	44	0	142.5	2.8e-33	sp|C4R7Z3|C9MT_KOMPG Sphingolipid C9-methyltransferase OS=Komagataella phaffii (strain GS115 / ATCC 20864) OX=644223 GN=PAS_chr4_0465 PE=1 SV=1
Unigene0000504	329	2	328	sp|Q5APD4|C9MT_CANAL	513	55	168	54.4	114	47	5	132.9	2.3e-30	sp|Q5APD4|C9MT_CANAL Sphingolipid C9-methyltransferase OS=Candida albicans (strain SC5314 / ATCC MYA-2876) OX=237561 GN=MTS1 PE=1 SV=1
Unigene0000507	380	209	376	sp|Q09776|SNU23_SCHPO	173	21	76	48.2	56	29	0	66.6	2.3e-10	sp|Q09776|SNU23_SCHPO U4/U6.U5 small nuclear ribonucleoprotein component snu23 OS=Schizosaccharomyces pombe (strain 972 / ATCC 24843) OX=284812 GN=snu23 PE=3 SV=4
Unigene0000507	380	65	379	sp|Q12368|SNU23_YEAST	194	6	102	33.9	109	56	16	53.9	1.5e-06	sp|Q12368|SNU23_YEAST 23 kDa U4/U6.U5 small nuclear ribonucleoprotein component OS=Saccharomyces cerevisiae (strain ATCC 204508 / S288c) OX=559292 GN=SNU23 PE=1 SV=1
Unigene0000509	470	445	140	sp|Q9SLK6|ALA6_ARATH	1240	370	472	70.9	103	29	1	133.3	2.5e-30	sp|Q9SLK6|ALA6_ARATH Phospholipid-transporting ATPase 6 OS=Arabidopsis thaliana OX=3702 GN=ALA6 PE=1 SV=2
Unigene0000509	470	445	149	sp|Q9LVK9|ALA7_ARATH	1243	369	468	72	100	27	1	132.1	5.5e-30	sp|Q9LVK9|ALA7_ARATH Probable phospholipid-transporting ATPase 7 OS=Arabidopsis thaliana OX=3702 GN=ALA7 PE=3 SV=3
Unigene0000509	470	445	149	sp|Q9LNQ4|ALA4_ARATH	1216	369	468	67	100	32	1	124.4	1.1e-27	sp|Q9LNQ4|ALA4_ARATH Probable phospholipid-transporting ATPase 4 OS=Arabidopsis thaliana OX=3702 GN=ALA4 PE=3 SV=2
Unigene0000509	470	445	149	sp|Q9SGG3|ALA5_ARATH	1228	369	468	68	100	31	1	124.4	1.1e-27	sp|Q9SGG3|ALA5_ARATH Probable phospholipid-transporting ATPase 5 OS=Arabidopsis thaliana OX=3702 GN=ALA5 PE=3 SV=1
Unigene0000509	470	445	101	sp|Q9LK90|ALA8_ARATH	1189	368	480	55.2	116	48	4	110.5	1.7e-23	sp|Q9LK90|ALA8_ARATH Probable phospholipid-transporting ATPase 8 OS=Arabidopsis thaliana OX=3702 GN=ALA8 PE=3 SV=1
Unigene0000509	470	445	170	sp|Q9SX33|ALA9_ARATH	1200	375	466	59.8	92	37	0	106.3	3.2e-22	sp|Q9SX33|ALA9_ARATH Putative phospholipid-transporting ATPase 9 OS=Arabidopsis thaliana OX=3702 GN=ALA9 PE=3 SV=1
Unigene0000509	470	445	161	sp|P57792|ALA12_ARATH	1184	375	469	58.9	95	39	0	103.6	2.1e-21	sp|P57792|ALA12_ARATH Probable phospholipid-transporting ATPase 12 OS=Arabidopsis thaliana OX=3702 GN=ALA12 PE=3 SV=1
Unigene0000509	470	445	176	sp|Q9LI83|ALA10_ARATH	1202	375	464	61.1	90	35	0	100.9	1.4e-20	sp|Q9LI83|ALA10_ARATH Phospholipid-transporting ATPase 10 OS=Arabidopsis thaliana OX=3702 GN=ALA10 PE=3 SV=1
Unigene0000509	470	445	155	sp|Q9SAF5|ALA11_ARATH	1203	374	470	55.7	97	43	0	98.2	8.8e-20	sp|Q9SAF5|ALA11_ARATH Probable phospholipid-transporting ATPase 11 OS=Arabidopsis thaliana OX=3702 GN=ALA11 PE=2 SV=1
Unigene0000509	470	436	146	sp|O60312|AT10A_HUMAN	1499	375	471	43.3	97	55	0	80.1	2.5e-14	sp|O60312|AT10A_HUMAN Phospholipid-transporting ATPase VA OS=Homo sapiens OX=9606 GN=ATP10A PE=1 SV=2
Unigene0000509	470	436	146	sp|O54827|AT10A_MOUSE	1508	379	475	41.2	97	57	0	79	5.5e-14	sp|O54827|AT10A_MOUSE Phospholipid-transporting ATPase VA OS=Mus musculus OX=10090 GN=Atp10a PE=1 SV=4
Unigene0000509	470	436	209	sp|Q29449|AT8A1_BOVIN	1149	357	432	56.6	76	33	0	75.1	8.0e-13	sp|Q29449|AT8A1_BOVIN Probable phospholipid-transporting ATPase IA OS=Bos taurus OX=9913 GN=ATP8A1 PE=1 SV=2
Unigene0000509	470	436	167	sp|Q5BL50|AT8B1_XENTR	1250	402	491	44.4	90	50	0	74.3	1.4e-12	sp|Q5BL50|AT8B1_XENTR Phospholipid-transporting ATPase IC OS=Xenopus tropicalis OX=8364 GN=atp8b1 PE=2 SV=1
Unigene0000509	470	436	209	sp|Q148W0|AT8B1_MOUSE	1251	402	477	50	76	38	0	70.5	2.0e-11	sp|Q148W0|AT8B1_MOUSE Phospholipid-transporting ATPase IC OS=Mus musculus OX=10090 GN=Atp8b1 PE=1 SV=2
Unigene0000509	470	436	209	sp|O43520|AT8B1_HUMAN	1251	402	477	50	76	38	0	69.7	3.4e-11	sp|O43520|AT8B1_HUMAN Phospholipid-transporting ATPase IC OS=Homo sapiens OX=9606 GN=ATP8B1 PE=1 SV=3
Unigene0000509	470	430	212	sp|Q6UQ17|AT8B3_MOUSE	1335	357	429	43.8	73	41	0	55.8	5.0e-07	sp|Q6UQ17|AT8B3_MOUSE Phospholipid-transporting ATPase IK OS=Mus musculus OX=10090 GN=Atp8b3 PE=1 SV=1
Unigene0000528	244	1	243	sp|P42045|HEMH_HORVU	484	386	466	67.9	81	26	0	110.5	8.9e-24	sp|P42045|HEMH_HORVU Ferrochelatase-2, chloroplastic OS=Hordeum vulgare OX=4513 GN=HEMH PE=2 SV=1
Unigene0000528	244	1	243	sp|Q69TB1|HEMH1_ORYSJ	482	384	464	69.1	81	25	0	109.8	1.5e-23	sp|Q69TB1|HEMH1_ORYSJ Ferrochelatase-1, chloroplastic OS=Oryza sativa subsp. japonica OX=39947 GN=Os09g0297000 PE=2 SV=1
Unigene0000528	244	1	243	sp|P42044|HEMH_CUCSA	514	392	472	66.7	81	27	0	109.4	2.0e-23	sp|P42044|HEMH_CUCSA Ferrochelatase-2, chloroplastic OS=Cucumis sativus OX=3659 GN=HEMH PE=2 SV=1
Unigene0000528	244	1	243	sp|P42043|HEMH1_ARATH	466	367	450	60.7	84	30	3	100.1	1.2e-20	sp|P42043|HEMH1_ARATH Ferrochelatase-1, chloroplastic/mitochondrial OS=Arabidopsis thaliana OX=3702 GN=FC1 PE=2 SV=1
Unigene0000528	244	1	177	sp|Q0DIV0|HEMH2_ORYSJ	526	391	449	61	59	23	0	75.9	2.4e-13	sp|Q0DIV0|HEMH2_ORYSJ Ferrochelatase-2, chloroplastic OS=Oryza sativa subsp. japonica OX=39947 GN=Os05g0361200 PE=2 SV=1
Unigene0000528	244	1	177	sp|A2Y3Q5|HEMH_ORYSI	526	391	449	61	59	23	0	75.9	2.4e-13	sp|A2Y3Q5|HEMH_ORYSI Ferrochelatase-2, chloroplastic OS=Oryza sativa subsp. indica OX=39946 GN=HEMH PE=2 SV=2
Unigene0000530	1313	1266	217	sp|B6VJS4|ROMT_VITVI	357	7	356	47.4	352	181	4	349	8.0e-95	sp|B6VJS4|ROMT_VITVI Trans-resveratrol di-O-methyltransferase OS=Vitis vinifera OX=29760 GN=ROMT PE=1 SV=2
Unigene0000530	1313	1263	217	sp|A0A0N9HMN6|POMT3_SINHE	372	20	371	45.7	352	188	3	340.5	2.9e-92	sp|A0A0N9HMN6|POMT3_SINHE Pluviatolide O-methyltransferase OS=Sinopodophyllum hexandrum OX=93608 GN=OMT3 PE=1 SV=1
Unigene0000530	1313	1275	217	sp|B0ZB57|OMT3_HUMLU	377	18	376	43.3	360	196	8	327	3.3e-88	sp|B0ZB57|OMT3_HUMLU Probable O-methyltransferase 3 OS=Humulus lupulus OX=3486 GN=OMT3 PE=2 SV=1
Unigene0000530	1313	1266	217	sp|Q93WU2|EOMT1_OCIBA	357	10	356	43.3	351	194	5	319.3	6.8e-86	sp|Q93WU2|EOMT1_OCIBA Eugenol O-methyltransferase OS=Ocimum basilicum OX=39350 GN=EOMT1 PE=1 SV=1
Unigene0000530	1313	1266	217	sp|Q93WU3|CVMT1_OCIBA	356	10	355	42.9	350	196	4	316.2	5.8e-85	sp|Q93WU3|CVMT1_OCIBA Chavicol O-methyltransferase OS=Ocimum basilicum OX=39350 GN=CVOMT1 PE=1 SV=1
Unigene0000530	1313	1263	217	sp|S5DWK8|F8MT1_OCIBA	359	9	358	43.2	352	195	5	310.8	2.4e-83	sp|S5DWK8|F8MT1_OCIBA Flavonoid 8-O-methyltransferase 1 OS=Ocimum basilicum OX=39350 GN=F8OMT-1 PE=1 SV=1
Unigene0000530	1313	1284	217	sp|Q6VMW0|Q8OMT_MENPI	366	1	365	40.2	366	208	11	300.1	4.3e-80	sp|Q6VMW0|Q8OMT_MENPI 8-hydroxyquercetin 8-O-methyltransferase OS=Mentha piperita OX=34256 GN=OMT2 PE=1 SV=1
Unigene0000530	1313	1266	217	sp|B0EXJ8|HTOMT_CATRO	355	3	354	44.2	355	190	8	297.7	2.1e-79	sp|B0EXJ8|HTOMT_CATRO Tabersonine 16-O-methyltransferase OS=Catharanthus roseus OX=4058 GN=16OMT PE=1 SV=1
Unigene0000530	1313	1281	217	sp|O22308|7OMT6_MEDSA	352	3	351	41.4	355	202	6	288.1	1.7e-76	sp|O22308|7OMT6_MEDSA Isoflavone-7-O-methyltransferase 6 OS=Medicago sativa OX=3879 PE=2 SV=1
Unigene0000530	1313	1281	217	sp|O24529|7OMT8_MEDSA	352	3	351	41.4	355	202	6	288.1	1.7e-76	sp|O24529|7OMT8_MEDSA Isoflavone-7-O-methyltransferase 8 OS=Medicago sativa OX=3879 PE=1 SV=1
Unigene0000530	1313	1281	217	sp|O22309|7OMT9_MEDSA	352	3	351	41.4	355	202	6	287.7	2.2e-76	sp|O22309|7OMT9_MEDSA Isoflavone-7-O-methyltransferase 9 OS=Medicago sativa OX=3879 PE=2 SV=1
Unigene0000530	1313	1281	217	sp|Q84KK5|D7OMT_GLYEC	357	3	356	39.1	358	211	7	285	1.4e-75	sp|Q84KK5|D7OMT_GLYEC Isoflavone 7-O-methyltransferase OS=Glycyrrhiza echinata OX=46348 GN=D7OMT PE=1 SV=1
Unigene0000530	1313	1269	217	sp|Q8GSN1|MOMT_CATRO	348	2	347	39.8	352	205	7	282.7	7.1e-75	sp|Q8GSN1|MOMT_CATRO Myricetin O-methyltransferase OS=Catharanthus roseus OX=4058 PE=1 SV=1
Unigene0000530	1313	1254	217	sp|P0DH60|M3OM2_PEA	360	12	359	40.6	350	202	6	282	1.2e-74	sp|P0DH60|M3OM2_PEA (+)-6a-hydroxymaackiain 3-O-methyltransferase 2 OS=Pisum sativum OX=3888 GN=HMM2 PE=1 SV=1
Unigene0000530	1313	1263	217	sp|P47917|ZRP4_MAIZE	364	9	363	41.2	357	200	10	279.6	6.0e-74	sp|P47917|ZRP4_MAIZE O-methyltransferase ZRP4 OS=Zea mays OX=4577 GN=ZRP4 PE=2 SV=1
Unigene0000530	1313	1254	217	sp|Q84KK6|I4OMT_GLYEC	367	12	366	38.9	357	205	13	278.1	1.7e-73	sp|Q84KK6|I4OMT_GLYEC Isoflavone 4'-O-methyltransferase OS=Glycyrrhiza echinata OX=46348 GN=HI4'OMT PE=1 SV=1
Unigene0000530	1313	1254	217	sp|O24305|M3OM1_PEA	360	12	359	40.7	351	200	8	277.3	3.0e-73	sp|O24305|M3OM1_PEA (+)-6a-hydroxymaackiain 3-O-methyltransferase 1 OS=Pisum sativum OX=3888 GN=HMM1 PE=1 SV=1
Unigene0000530	1313	1260	217	sp|A8QW53|OMT3_SORBI	374	8	373	38.6	368	204	22	277.3	3.0e-73	sp|A8QW53|OMT3_SORBI 5-pentadecatrienyl resorcinol O-methyltransferase OS=Sorghum bicolor OX=4558 GN=OMT3 PE=1 SV=1
Unigene0000530	1313	1254	217	sp|Q84KK4|I4OMT_LOTJA	365	13	364	40.3	355	200	12	274.2	2.5e-72	sp|Q84KK4|I4OMT_LOTJA Isoflavone 4'-O-methyltransferase OS=Lotus japonicus OX=34305 GN=HI4'OMT PE=1 SV=1
Unigene0000530	1313	1254	217	sp|Q29U70|I4OMT_MEDTR	364	12	363	40.8	355	198	12	271.6	1.6e-71	sp|Q29U70|I4OMT_MEDTR Isoflavone 4'-O-methyltransferase OS=Medicago truncatula OX=3880 GN=HI4'OMT PE=1 SV=1
Unigene0000531	286	286	152	sp|P35685|RL7A1_ORYSJ	258	214	258	86.7	45	6	0	81.3	6.8e-15	sp|P35685|RL7A1_ORYSJ Large ribosomal subunit protein eL8z OS=Oryza sativa subsp. japonica OX=39947 GN=RPL7A-1 PE=2 SV=1
Unigene0000531	286	286	152	sp|P0DKK7|RL7A2_ORYSJ	258	214	258	86.7	45	6	0	81.3	6.8e-15	sp|P0DKK7|RL7A2_ORYSJ Large ribosomal subunit protein eL8y OS=Oryza sativa subsp. japonica OX=39947 GN=RPL7A-2 PE=2 SV=1
Unigene0000531	286	286	155	sp|P49692|RL7A1_ARATH	257	213	256	86.4	44	6	0	76.6	1.7e-13	sp|P49692|RL7A1_ARATH Large ribosomal subunit protein eL8z OS=Arabidopsis thaliana OX=3702 GN=RPL7AA PE=2 SV=2
Unigene0000531	286	286	155	sp|Q9LZH9|RL7A2_ARATH	256	212	255	86.4	44	6	0	76.6	1.7e-13	sp|Q9LZH9|RL7A2_ARATH Large ribosomal subunit protein eL8y OS=Arabidopsis thaliana OX=3702 GN=RPL7AB PE=1 SV=1
Unigene0000531	286	286	158	sp|P46223|RL7A_DROME	271	227	269	51.2	43	21	0	52.8	2.6e-06	sp|P46223|RL7A_DROME Large ribosomal subunit protein eL8 OS=Drosophila melanogaster OX=7227 GN=RpL7A PE=1 SV=2
Unigene0000531	286	286	155	sp|O57592|RL7A_TAKRU	266	222	265	47.7	44	23	0	51.6	5.8e-06	sp|O57592|RL7A_TAKRU Large ribosomal subunit protein eL8 OS=Takifugu rubripes OX=31033 GN=rpl7a PE=3 SV=3
Unigene0000531	286	286	158	sp|O76732|RL7A_ANOGA	271	228	270	48.8	43	22	0	51.2	7.5e-06	sp|O76732|RL7A_ANOGA Large ribosomal subunit protein eL8 OS=Anopheles gambiae OX=7165 GN=RpL7A PE=3 SV=2
Unigene0000540	2398	2054	726	sp|Q9SZA4|CDC21_ARATH	457	19	457	73.7	445	109	8	657.1	2.5e-187	sp|Q9SZA4|CDC21_ARATH Cell division cycle 20.1, cofactor of APC complex OS=Arabidopsis thaliana OX=3702 GN=CDC20-1 PE=1 SV=1
Unigene0000540	2398	2054	726	sp|Q9S7I8|CDC22_ARATH	447	9	447	73.3	445	111	8	651.7	1.1e-185	sp|Q9S7I8|CDC22_ARATH Cell division cycle 20.2, cofactor of APC complex OS=Arabidopsis thaliana OX=3702 GN=CDC20-2 PE=1 SV=1
Unigene0000540	2398	2003	726	sp|Q3E906|CD205_ARATH	450	31	450	67.3	428	130	10	577.8	1.9e-163	sp|Q3E906|CD205_ARATH Cell division cycle 20.5, cofactor of APC complex OS=Arabidopsis thaliana OX=3702 GN=CDC20-5 PE=1 SV=3
Unigene0000540	2398	2036	726	sp|Q9S7H3|CD203_ARATH	442	13	442	65.5	440	139	13	557	3.5e-157	sp|Q9S7H3|CD203_ARATH Cell division cycle 20.3, cofactor of APC complex OS=Arabidopsis thaliana OX=3702 GN=CDC20-3 PE=3 SV=1
Unigene0000540	2398	2036	726	sp|Q4PSE4|CDC24_ARATH	444	16	444	64	439	146	12	549.7	5.7e-155	sp|Q4PSE4|CDC24_ARATH Cell division cycle 20.4, cofactor of APC complex OS=Arabidopsis thaliana OX=3702 GN=CDC20-4 PE=2 SV=1
Unigene0000540	2398	1631	726	sp|F4K5R6|CDC26_ARATH	428	128	428	71.4	304	82	5	457.6	2.9e-127	sp|F4K5R6|CDC26_ARATH Cell division cycle 20.6, cofactor of APC complex OS=Arabidopsis thaliana OX=3702 GN=CDC20-6 PE=3 SV=1
Unigene0000540	2398	2003	798	sp|Q54MZ3|CDC20_DICDI	499	48	469	51	431	173	38	411.4	2.4e-113	sp|Q54MZ3|CDC20_DICDI Anaphase-promoting complex subunit cdc20 OS=Dictyostelium discoideum OX=44689 GN=cdc20 PE=1 SV=1
Unigene0000540	2398	2045	744	sp|Q9JJ66|CDC20_MOUSE	499	64	492	45.5	440	223	17	376.7	6.6e-103	sp|Q9JJ66|CDC20_MOUSE Cell division cycle protein 20 homolog OS=Mus musculus OX=10090 GN=Cdc20 PE=1 SV=2
Unigene0000540	2398	2045	744	sp|Q62623|CDC20_RAT	499	64	492	45	440	225	17	375.6	1.5e-102	sp|Q62623|CDC20_RAT Cell division cycle protein 20 homolog OS=Rattus norvegicus OX=10116 GN=Cdc20 PE=1 SV=2
Unigene0000540	2398	2045	744	sp|Q12834|CDC20_HUMAN	499	64	492	45.7	440	222	17	375.2	1.9e-102	sp|Q12834|CDC20_HUMAN Cell division cycle protein 20 homolog OS=Homo sapiens OX=9606 GN=CDC20 PE=1 SV=2
Unigene0000540	2398	2045	744	sp|Q5H7C0|CDC20_PIG	499	64	492	45.5	440	223	17	372.9	9.5e-102	sp|Q5H7C0|CDC20_PIG Cell division cycle protein 20 homolog OS=Sus scrofa OX=9823 GN=CDC20 PE=2 SV=1
Unigene0000540	2398	2042	744	sp|A0A396ISC0|CS52B_MEDTR	486	44	479	42.8	449	228	29	350.5	5.0e-95	sp|A0A396ISC0|CS52B_MEDTR B-type cell cycle switch protein ccs52B OS=Medicago truncatula OX=3880 GN=CCS52B PE=2 SV=1
Unigene0000540	2398	2024	786	sp|Q8VZS9|FZR1_ARATH	475	46	456	44.3	429	205	34	349	1.5e-94	sp|Q8VZS9|FZR1_ARATH Protein FIZZY-RELATED 1 OS=Arabidopsis thaliana OX=3702 GN=FZR1 PE=1 SV=1
Unigene0000540	2398	2024	786	sp|Q9M7I2|CS52A_MEDTR	475	44	456	43.5	441	193	56	347.1	5.6e-94	sp|Q9M7I2|CS52A_MEDTR B-type cell cycle switch protein ccs52A OS=Medicago truncatula OX=3880 GN=CCS52A PE=1 SV=1
Unigene0000540	2398	2048	774	sp|Q8LPL5|FZR3_ARATH	481	32	466	41	451	224	42	345.9	1.2e-93	sp|Q8LPL5|FZR3_ARATH Protein FIZZY-RELATED 3 OS=Arabidopsis thaliana OX=3702 GN=FZR3 PE=1 SV=1
Unigene0000540	2398	2042	786	sp|Q8L3Z8|FZR2_ARATH	483	47	464	42.8	437	213	37	343.2	8.0e-93	sp|Q8L3Z8|FZR2_ARATH Protein FIZZY-RELATED 2 OS=Arabidopsis thaliana OX=3702 GN=FZR2 PE=1 SV=1
Unigene0000540	2398	2003	777	sp|Q9R1K5|FZR1_MOUSE	493	46	480	42	445	212	46	332.8	1.1e-89	sp|Q9R1K5|FZR1_MOUSE Fizzy-related protein homolog OS=Mus musculus OX=10090 GN=Fzr1 PE=1 SV=1
Unigene0000540	2398	1763	798	sp|Q54KM3|CDH1_DICDI	754	387	730	47.4	346	156	26	332	1.9e-89	sp|Q54KM3|CDH1_DICDI Anaphase-promoting complex subunit cdh1 OS=Dictyostelium discoideum OX=44689 GN=cdh1 PE=3 SV=1
Unigene0000540	2398	2003	777	sp|Q9UM11|FZR1_HUMAN	496	46	480	41.8	445	213	46	331.3	3.2e-89	sp|Q9UM11|FZR1_HUMAN Fizzy-related protein homolog OS=Homo sapiens OX=9606 GN=FZR1 PE=1 SV=2
Unigene0000540	2398	2093	774	sp|P78972|SLP1_SCHPO	488	59	474	41.9	446	223	36	325.1	2.3e-87	sp|P78972|SLP1_SCHPO WD repeat-containing protein slp1 OS=Schizosaccharomyces pombe (strain 972 / ATCC 24843) OX=284812 GN=slp1 PE=1 SV=1
Unigene0000594	2669	238	2214	sp|Q3E7D0|NAT12_ARATH	709	28	709	65.1	682	215	23	840.1	2.3e-242	sp|Q3E7D0|NAT12_ARATH Nucleobase-ascorbate transporter 12 OS=Arabidopsis thaliana OX=3702 GN=NAT12 PE=1 SV=3
Unigene0000594	2669	238	2190	sp|Q6SZ87|NAT11_ARATH	709	53	704	49.4	664	311	25	621.7	1.3e-176	sp|Q6SZ87|NAT11_ARATH Nucleobase-ascorbate transporter 11 OS=Arabidopsis thaliana OX=3702 GN=NAT11 PE=2 SV=1
Unigene0000594	2669	601	2190	sp|Q9SHZ3|NAT1_ARATH	520	15	517	36.4	538	299	43	330.9	4.6e-89	sp|Q9SHZ3|NAT1_ARATH Nucleobase-ascorbate transporter 1 OS=Arabidopsis thaliana OX=3702 GN=NAT1 PE=2 SV=1
Unigene0000594	2669	601	2190	sp|Q94C70|NAT2_ARATH	524	20	521	34.7	536	310	40	325.1	2.5e-87	sp|Q94C70|NAT2_ARATH Nucleobase-ascorbate transporter 2 OS=Arabidopsis thaliana OX=3702 GN=NAT2 PE=2 SV=2
Unigene0000594	2669	601	2190	sp|Q0WPE9|NAT7_ARATH	538	32	535	35.5	538	305	42	325.1	2.5e-87	sp|Q0WPE9|NAT7_ARATH Nucleobase-ascorbate transporter 7 OS=Arabidopsis thaliana OX=3702 GN=NAT7 PE=2 SV=2
Unigene0000594	2669	601	2190	sp|Q8RWE9|NAT5_ARATH	528	22	525	34	538	313	42	318.5	2.4e-85	sp|Q8RWE9|NAT5_ARATH Nucleobase-ascorbate transporter 5 OS=Arabidopsis thaliana OX=3702 GN=NAT5 PE=2 SV=1
Unigene0000594	2669	535	2190	sp|Q27GI3|NAT6_ARATH	532	5	529	34.1	560	326	43	316.2	1.2e-84	sp|Q27GI3|NAT6_ARATH Nucleobase-ascorbate transporter 6 OS=Arabidopsis thaliana OX=3702 GN=NAT6 PE=2 SV=2
Unigene0000594	2669	595	2190	sp|Q41760|LPE1_MAIZE	527	19	524	34.1	540	314	42	299.3	1.5e-79	sp|Q41760|LPE1_MAIZE Nucleobase-ascorbate transporter LPE1 OS=Zea mays OX=4577 GN=LPE1 PE=1 SV=2
Unigene0000594	2669	601	2190	sp|P93039|NAT4_ARATH	526	20	523	33.1	538	318	42	297	7.4e-79	sp|P93039|NAT4_ARATH Nucleobase-ascorbate transporter 4 OS=Arabidopsis thaliana OX=3702 GN=NAT4 PE=2 SV=2
Unigene0000594	2669	598	2187	sp|Q8GZD4|NAT3_ARATH	551	43	545	33.5	537	316	41	295.8	1.6e-78	sp|Q8GZD4|NAT3_ARATH Nucleobase-ascorbate transporter 3 OS=Arabidopsis thaliana OX=3702 GN=NAT3 PE=2 SV=2
Unigene0000594	2669	607	2196	sp|Q9EPR4|S23A2_MOUSE	648	91	611	32	562	309	73	292.4	1.8e-77	sp|Q9EPR4|S23A2_MOUSE Solute carrier family 23 member 2 OS=Mus musculus OX=10090 GN=Slc23a2 PE=1 SV=2
Unigene0000594	2669	607	2196	sp|Q9WTW8|S23A2_RAT	647	90	610	32	562	309	73	291.6	3.1e-77	sp|Q9WTW8|S23A2_RAT Solute carrier family 23 member 2 OS=Rattus norvegicus OX=10116 GN=Slc23a2 PE=1 SV=2
Unigene0000594	2669	607	2196	sp|Q9UGH3|S23A2_HUMAN	650	91	613	31.4	563	313	73	290	9.0e-77	sp|Q9UGH3|S23A2_HUMAN Solute carrier family 23 member 2 OS=Homo sapiens OX=9606 GN=SLC23A2 PE=1 SV=1
Unigene0000594	2669	601	2190	sp|Q8VZQ5|NAT8_ARATH	539	30	536	32.7	545	314	53	288.1	3.4e-76	sp|Q8VZQ5|NAT8_ARATH Nucleobase-ascorbate transporter 8 OS=Arabidopsis thaliana OX=3702 GN=NAT8 PE=2 SV=1
Unigene0000594	2669	607	2196	sp|B0JZG0|S23A2_XENTR	649	90	611	30.6	562	318	72	283.1	1.1e-74	sp|B0JZG0|S23A2_XENTR Solute carrier family 23 member 2 OS=Xenopus tropicalis OX=8364 GN=slc23a2 PE=2 SV=1
Unigene0000594	2669	535	2193	sp|Q9Z2J0|S23A1_MOUSE	605	8	562	30.6	594	332	80	273.5	8.7e-72	sp|Q9Z2J0|S23A1_MOUSE Solute carrier family 23 member 1 OS=Mus musculus OX=10090 GN=Slc23a1 PE=1 SV=2
Unigene0000594	2669	607	2193	sp|Q9WTW7|S23A1_RAT	604	40	562	31.5	562	313	72	271.6	3.3e-71	sp|Q9WTW7|S23A1_RAT Solute carrier family 23 member 1 OS=Rattus norvegicus OX=10116 GN=Slc23a1 PE=2 SV=1
Unigene0000594	2669	607	2193	sp|Q9UHI7|S23A1_HUMAN	598	33	555	30.9	563	315	74	264.6	4.0e-69	sp|Q9UHI7|S23A1_HUMAN Solute carrier family 23 member 1 OS=Homo sapiens OX=9606 GN=SLC23A1 PE=1 SV=4
Unigene0000594	2669	601	2190	sp|O04472|NAT10_ARATH	541	30	538	31	545	325	51	260.8	5.8e-68	sp|O04472|NAT10_ARATH Putative nucleobase-ascorbate transporter 10 OS=Arabidopsis thaliana OX=3702 GN=NAT10 PE=3 SV=2
Unigene0000594	2669	601	1902	sp|Q3E956|NBAT9_ARATH	419	42	393	29.2	438	220	90	174.9	4.2e-42	sp|Q3E956|NBAT9_ARATH Putative nucleobase-ascorbate transporter 9 OS=Arabidopsis thaliana OX=3702 GN=NAT9 PE=3 SV=1
Unigene0000596	334	110	334	sp|Q3E7D0|NAT12_ARATH	709	108	191	44	84	38	9	52.4	3.9e-06	sp|Q3E7D0|NAT12_ARATH Nucleobase-ascorbate transporter 12 OS=Arabidopsis thaliana OX=3702 GN=NAT12 PE=1 SV=3
Unigene0000600	239	237	148	sp|P48631|FD6E2_SOYBN	383	353	383	71	31	8	1	52.8	2.1e-06	sp|P48631|FD6E2_SOYBN Omega-6 fatty acid desaturase, endoplasmic reticulum isozyme 2 OS=Glycine max OX=3847 GN=FAD2-2 PE=2 SV=1
Unigene0000600	239	237	148	sp|Q39287|FAD6E_BRAJU	384	354	384	67.7	31	9	1	51.6	4.8e-06	sp|Q39287|FAD6E_BRAJU Omega-6 fatty acid desaturase, endoplasmic reticulum OS=Brassica juncea OX=3707 PE=2 SV=1
Unigene0000618	512	104	502	sp|Q9LQU4|PCR2_ARATH	152	16	152	57.7	137	54	4	180.3	1.9e-44	sp|Q9LQU4|PCR2_ARATH Protein PLANT CADMIUM RESISTANCE 2 OS=Arabidopsis thaliana OX=3702 GN=PCR2 PE=1 SV=1
Unigene0000618	512	53	502	sp|D9HP25|CNR9_MAIZE	175	27	175	55.9	152	62	5	179.9	2.5e-44	sp|D9HP25|CNR9_MAIZE Cell number regulator 9 OS=Zea mays OX=4577 GN=CNR9 PE=2 SV=1
Unigene0000618	512	104	490	sp|D9HP26|CNR10_MAIZE	157	31	154	58.9	129	48	5	174.5	1.1e-42	sp|D9HP26|CNR10_MAIZE Cell number regulator 10 OS=Zea mays OX=4577 GN=CNR10 PE=2 SV=1
Unigene0000618	512	104	502	sp|P0CW97|PCR3_ARATH	152	16	152	52.6	137	61	4	169.9	2.6e-41	sp|P0CW97|PCR3_ARATH Protein PLANT CADMIUM RESISTANCE 3 OS=Arabidopsis thaliana OX=3702 GN=PCR3 PE=3 SV=1
Unigene0000618	512	104	502	sp|B6TZ45|CNR1_MAIZE	191	51	191	53.2	141	58	8	168.7	5.8e-41	sp|B6TZ45|CNR1_MAIZE Cell number regulator 1 OS=Zea mays OX=4577 GN=CNR1 PE=2 SV=1
Unigene0000618	512	104	502	sp|Q9LQU2|PCR1_ARATH	151	15	151	53.3	137	60	4	164.5	1.1e-39	sp|Q9LQU2|PCR1_ARATH Protein PLANT CADMIUM RESISTANCE 1 OS=Arabidopsis thaliana OX=3702 GN=PCR1 PE=1 SV=1
Unigene0000618	512	89	490	sp|D9HP23|CNR7_MAIZE	180	29	177	49.7	149	60	15	164.1	1.4e-39	sp|D9HP23|CNR7_MAIZE Cell number regulator 7 OS=Zea mays OX=4577 GN=CNR7 PE=2 SV=1
Unigene0000618	512	65	502	sp|B6TYV8|CNR2_MAIZE	181	35	181	52.7	148	67	3	161	1.2e-38	sp|B6TYV8|CNR2_MAIZE Cell number regulator 2 OS=Zea mays OX=4577 GN=CNR2 PE=2 SV=1
Unigene0000618	512	104	502	sp|Q9SX24|PCR11_ARATH	160	19	158	52.1	140	60	7	155.2	6.6e-37	sp|Q9SX24|PCR11_ARATH Protein PLANT CADMIUM RESISTANCE 11 OS=Arabidopsis thaliana OX=3702 GN=PCR11 PE=3 SV=1
Unigene0000618	512	104	481	sp|Q9LS43|PCR7_ARATH	133	5	127	51.6	126	58	3	150.6	1.6e-35	sp|Q9LS43|PCR7_ARATH Protein PLANT CADMIUM RESISTANCE 7 OS=Arabidopsis thaliana OX=3702 GN=PCR7 PE=2 SV=1
Unigene0000618	512	104	490	sp|D9HP19|CNR3_MAIZE	167	32	164	54.9	133	56	4	148.7	6.2e-35	sp|D9HP19|CNR3_MAIZE Cell number regulator 3 OS=Zea mays OX=4577 GN=CNR3 PE=2 SV=1
Unigene0000618	512	86	478	sp|Q9LS44|PCR4_ARATH	184	48	177	48.9	131	66	1	143.7	2.0e-33	sp|Q9LS44|PCR4_ARATH Protein PLANT CADMIUM RESISTANCE 4 OS=Arabidopsis thaliana OX=3702 GN=PCR4 PE=3 SV=1
Unigene0000618	512	23	481	sp|Q9M9A5|PCR6_ARATH	224	60	218	40.3	159	89	6	143.7	2.0e-33	sp|Q9M9A5|PCR6_ARATH Protein PLANT CADMIUM RESISTANCE 6 OS=Arabidopsis thaliana OX=3702 GN=PCR6 PE=2 SV=1
Unigene0000618	512	62	433	sp|D9HP27|CNR11_MAIZE	158	27	148	52.4	124	57	2	136.3	3.2e-31	sp|D9HP27|CNR11_MAIZE Cell number regulator 11 OS=Zea mays OX=4577 GN=CNR11 PE=2 SV=1
Unigene0000618	512	104	502	sp|Q9SX26|PCR12_ARATH	161	29	161	43.3	134	74	2	126.3	3.3e-28	sp|Q9SX26|PCR12_ARATH Protein PLANT CADMIUM RESISTANCE 12 OS=Arabidopsis thaliana OX=3702 GN=PCR12 PE=2 SV=2
Unigene0000618	512	92	502	sp|P0CW98|PCR9_ARATH	148	13	148	45.3	139	71	5	122.1	6.2e-27	sp|P0CW98|PCR9_ARATH Protein PLANT CADMIUM RESISTANCE 9 OS=Arabidopsis thaliana OX=3702 GN=PCR9 PE=3 SV=1
Unigene0000618	512	104	433	sp|D9HP20|CNR4_MAIZE	159	11	124	44.7	114	59	4	117.1	2.0e-25	sp|D9HP20|CNR4_MAIZE Cell number regulator 4 OS=Zea mays OX=4577 GN=CNR4 PE=2 SV=1
Unigene0000618	512	23	412	sp|Q8S8T8|PCR10_ARATH	190	11	164	35.7	154	75	24	100.5	1.9e-20	sp|Q8S8T8|PCR10_ARATH Protein PLANT CADMIUM RESISTANCE 10 OS=Arabidopsis thaliana OX=3702 GN=PCR10 PE=2 SV=1
Unigene0000618	512	83	412	sp|B4FF80|CNR5_MAIZE	184	38	162	36.8	125	64	15	92.8	4.0e-18	sp|B4FF80|CNR5_MAIZE Cell number regulator 5 OS=Zea mays OX=4577 GN=CNR5 PE=2 SV=1
Unigene0000619	908	171	587	sp|Q2QQ55|CNIH2_ORYSJ	149	1	139	69.1	139	43	0	189.5	5.6e-47	sp|Q2QQ55|CNIH2_ORYSJ Protein cornichon homolog 2 OS=Oryza sativa subsp. japonica OX=39947 GN=CNIH2 PE=2 SV=1
Unigene0000619	908	171	596	sp|Q9C7D7|CNIH1_ARATH	146	1	142	47.2	142	75	0	141.7	1.3e-32	sp|Q9C7D7|CNIH1_ARATH Protein cornichon homolog 1 OS=Arabidopsis thaliana OX=3702 GN=At3g12180 PE=2 SV=1
Unigene0000619	908	180	593	sp|Q84W04|CNIH4_ARATH	137	3	136	52.9	138	61	4	139	8.7e-32	sp|Q84W04|CNIH4_ARATH Protein cornichon homolog 4 OS=Arabidopsis thaliana OX=3702 GN=At1g12390 PE=1 SV=1
Unigene0000619	908	192	593	sp|Q8GWT5|CNIH3_ARATH	137	7	136	48.5	134	65	4	126.7	4.5e-28	sp|Q8GWT5|CNIH3_ARATH Protein cornichon homolog 3 OS=Arabidopsis thaliana OX=3702 GN=At1g62880 PE=2 SV=1
Unigene0000619	908	240	593	sp|Q3EDD7|CNIH2_ARATH	129	15	128	55.1	118	49	4	125.6	1.0e-27	sp|Q3EDD7|CNIH2_ARATH Probable protein cornichon homolog 2 OS=Arabidopsis thaliana OX=3702 GN=At1g12340 PE=2 SV=2
Unigene0000619	908	192	593	sp|Q0DET3|CNIH1_ORYSJ	135	5	135	51.5	134	62	3	123.6	3.8e-27	sp|Q0DET3|CNIH1_ORYSJ Protein cornichon homolog 1 OS=Oryza sativa subsp. japonica OX=39947 GN=CNIH1 PE=1 SV=2
Unigene0000619	908	180	569	sp|Q9SZ74|CNIH5_ARATH	135	3	132	46.2	130	70	0	109.4	7.4e-23	sp|Q9SZ74|CNIH5_ARATH Protein cornichon homolog 5 OS=Arabidopsis thaliana OX=3702 GN=At4g12090 PE=2 SV=2
Unigene0000619	908	180	569	sp|Q9CX13|CNIH4_MOUSE	139	2	137	33.1	136	85	6	67	4.2e-10	sp|Q9CX13|CNIH4_MOUSE Protein cornichon homolog 4 OS=Mus musculus OX=10090 GN=Cnih4 PE=2 SV=1
Unigene0000619	908	192	569	sp|Q6P3N5|CNIH4_XENTR	139	6	137	33.3	132	82	6	63.9	3.6e-09	sp|Q6P3N5|CNIH4_XENTR Protein cornichon homolog 4 OS=Xenopus tropicalis OX=8364 GN=cnih4 PE=2 SV=1
Unigene0000619	908	180	569	sp|Q3T126|CNIH4_BOVIN	139	2	137	32.4	136	86	6	62.8	7.9e-09	sp|Q3T126|CNIH4_BOVIN Protein cornichon homolog 4 OS=Bos taurus OX=9913 GN=CNIH4 PE=2 SV=1
Unigene0000619	908	180	569	sp|Q9P003|CNIH4_HUMAN	139	2	137	30.9	136	88	6	62	1.4e-08	sp|Q9P003|CNIH4_HUMAN Protein cornichon homolog 4 OS=Homo sapiens OX=9606 GN=CNIH4 PE=1 SV=1
Unigene0000619	908	180	569	sp|Q5R9M4|CNIH4_PONAB	139	2	137	30.9	136	88	6	62	1.4e-08	sp|Q5R9M4|CNIH4_PONAB Protein cornichon homolog 4 OS=Pongo abelii OX=9601 GN=CNIH4 PE=2 SV=1
Unigene0000624	572	530	156	sp|Q8L805|RL35_WHEAT	124	1	124	69.6	125	37	1	161	1.3e-38	sp|Q8L805|RL35_WHEAT Large ribosomal subunit protein uL29 OS=Triticum aestivum OX=4565 GN=RPL35 PE=1 SV=1
Unigene0000624	572	518	156	sp|Q29361|RL35_PIG	123	3	123	53.7	121	56	0	118.6	7.7e-26	sp|Q29361|RL35_PIG Large ribosomal subunit protein uL29 OS=Sus scrofa OX=9823 GN=RPL35 PE=1 SV=3
Unigene0000624	572	518	156	sp|Q6ZWV7|RL35_MOUSE	123	3	123	52.9	121	57	0	118.2	1.0e-25	sp|Q6ZWV7|RL35_MOUSE Large ribosomal subunit protein uL29 OS=Mus musculus OX=10090 GN=Rpl35 PE=1 SV=1
Unigene0000624	572	518	156	sp|P17078|RL35_RAT	123	3	123	52.9	121	57	0	118.2	1.0e-25	sp|P17078|RL35_RAT Large ribosomal subunit protein uL29 OS=Rattus norvegicus OX=10116 GN=Rpl35 PE=1 SV=3
Unigene0000624	572	518	156	sp|P42766|RL35_HUMAN	123	3	123	52.9	121	57	0	117.9	1.3e-25	sp|P42766|RL35_HUMAN Large ribosomal subunit protein uL29 OS=Homo sapiens OX=9606 GN=RPL35 PE=1 SV=2
Unigene0000624	572	518	156	sp|G1SIT5|RL35_RABIT	123	3	123	52.9	121	57	0	117.9	1.3e-25	sp|G1SIT5|RL35_RABIT Large ribosomal subunit protein uL29 OS=Oryctolagus cuniculus OX=9986 GN=RPL35 PE=1 SV=1
Unigene0000624	572	518	156	sp|Q3MHM7|RL35_BOVIN	123	3	123	52.9	121	57	0	117.5	1.7e-25	sp|Q3MHM7|RL35_BOVIN Large ribosomal subunit protein uL29 OS=Bos taurus OX=9913 GN=RPL35 PE=2 SV=3
Unigene0000624	572	518	156	sp|Q98TF7|RL35_CHICK	123	3	123	52.1	121	58	0	117.5	1.7e-25	sp|Q98TF7|RL35_CHICK Large ribosomal subunit protein uL29 OS=Gallus gallus OX=9031 GN=RPL35 PE=2 SV=3
Unigene0000624	572	518	156	sp|Q69CJ9|RL35_OPHHA	123	3	123	52.9	121	57	0	117.5	1.7e-25	sp|Q69CJ9|RL35_OPHHA Large ribosomal subunit protein uL29 OS=Ophiophagus hannah OX=8665 GN=RPL35 PE=2 SV=3
Unigene0000624	572	518	156	sp|Q6PBC1|RL35_XENTR	123	3	123	53.7	121	56	0	117.1	2.2e-25	sp|Q6PBC1|RL35_XENTR Large ribosomal subunit protein uL29 OS=Xenopus tropicalis OX=8364 GN=rpl35 PE=2 SV=3
Unigene0000624	572	518	156	sp|Q8JHJ1|RL35_DANRE	123	3	123	53.7	121	56	0	116.3	3.8e-25	sp|Q8JHJ1|RL35_DANRE Large ribosomal subunit protein uL29 OS=Danio rerio OX=7955 GN=rpl35 PE=1 SV=3
Unigene0000624	572	518	156	sp|Q5DVH6|RL35_PLAFE	123	3	123	52.9	121	57	0	116.3	3.8e-25	sp|Q5DVH6|RL35_PLAFE Large ribosomal subunit protein uL29 OS=Platichthys flesus OX=8260 GN=rpl35 PE=2 SV=3
Unigene0000624	572	518	156	sp|Q6UZF7|RL35_HIPCM	123	3	123	52.1	121	58	0	114.8	1.1e-24	sp|Q6UZF7|RL35_HIPCM Large ribosomal subunit protein uL29 OS=Hippocampus comes OX=109280 GN=rpl35 PE=2 SV=3
Unigene0000624	572	518	159	sp|O80626|RL352_ARATH	123	3	122	52.5	120	57	0	113.6	2.5e-24	sp|O80626|RL352_ARATH Large ribosomal subunit protein uL29y OS=Arabidopsis thaliana OX=3702 GN=RPL35B PE=2 SV=1
Unigene0000624	572	518	156	sp|Q90YT4|RL35_ICTPU	123	3	123	52.1	121	58	0	113.6	2.5e-24	sp|Q90YT4|RL35_ICTPU Large ribosomal subunit protein uL29 OS=Ictalurus punctatus OX=7998 GN=rpl35 PE=2 SV=3
Unigene0000624	572	518	159	sp|Q9LZ41|RL354_ARATH	123	3	122	51.7	120	58	0	112.5	5.5e-24	sp|Q9LZ41|RL354_ARATH Large ribosomal subunit protein uL29w OS=Arabidopsis thaliana OX=3702 GN=RPL35D PE=2 SV=1
Unigene0000624	572	518	159	sp|Q9M3D2|RL353_ARATH	123	3	122	50.8	120	59	0	110.5	2.1e-23	sp|Q9M3D2|RL353_ARATH Large ribosomal subunit protein uL29x OS=Arabidopsis thaliana OX=3702 GN=RPL35C PE=2 SV=1
Unigene0000624	572	518	159	sp|Q9M5L0|RL35_EUPES	123	3	122	50	120	60	0	110.5	2.1e-23	sp|Q9M5L0|RL35_EUPES Large ribosomal subunit protein uL29 OS=Euphorbia esula OX=3993 GN=RPL35 PE=2 SV=1
Unigene0000624	572	518	159	sp|Q9SF53|RL351_ARATH	123	3	122	50.8	120	59	0	110.2	2.7e-23	sp|Q9SF53|RL351_ARATH Large ribosomal subunit protein uL29z OS=Arabidopsis thaliana OX=3702 GN=RPL35A PE=2 SV=1
Unigene0000624	572	515	156	sp|A0A1D8PK30|RL35_CANAL	120	4	120	51.7	120	55	3	107.5	1.8e-22	sp|A0A1D8PK30|RL35_CANAL Large ribosomal subunit protein uL29 OS=Candida albicans (strain SC5314 / ATCC MYA-2876) OX=237561 GN=RPL35 PE=1 SV=1
Unigene0000625	455	427	113	sp|P48503|QCR8_NEUCR	107	1	106	55.7	106	46	1	126.7	2.2e-28	sp|P48503|QCR8_NEUCR Cytochrome b-c1 complex subunit 8 OS=Neurospora crassa (strain ATCC 24698 / 74-OR23-1A / CBS 708.71 / DSM 1257 / FGSC 987) OX=367110 GN=qcr8 PE=1 SV=1
Unigene0000625	455	367	128	sp|P08525|QCR8_YEAST	94	9	88	46.2	80	43	0	73.9	1.7e-12	sp|P08525|QCR8_YEAST Cytochrome b-c1 complex subunit 8, mitochondrial OS=Saccharomyces cerevisiae (strain ATCC 204508 / S288c) OX=559292 GN=QCR8 PE=1 SV=2
Unigene0000625	455	367	128	sp|P49346|QCR8_KLULA	94	9	88	40	80	48	0	68.2	9.4e-11	sp|P49346|QCR8_KLULA Cytochrome b-c1 complex subunit 8 OS=Kluyveromyces lactis (strain ATCC 8585 / CBS 2359 / DSM 70799 / NBRC 1267 / NRRL Y-1140 / WM37) OX=284590 GN=QCR8 PE=3 SV=1
Unigene0000627	1720	110	1477	sp|Q6NKW9|E138_ARATH	481	22	476	58.5	458	185	5	551.2	1.4e-155	sp|Q6NKW9|E138_ARATH Glucan endo-1,3-beta-glucosidase 8 OS=Arabidopsis thaliana OX=3702 GN=At1g64760 PE=2 SV=2
Unigene0000627	1720	50	1480	sp|Q93Z08|E136_ARATH	477	1	477	50.4	482	229	10	469.9	4.1e-131	sp|Q93Z08|E136_ARATH Glucan endo-1,3-beta-glucosidase 6 OS=Arabidopsis thaliana OX=3702 GN=At5g58090 PE=2 SV=2
Unigene0000627	1720	53	1483	sp|Q9M088|E135_ARATH	484	8	476	49.9	479	228	12	468	1.6e-130	sp|Q9M088|E135_ARATH Glucan endo-1,3-beta-glucosidase 5 OS=Arabidopsis thaliana OX=3702 GN=At4g31140 PE=2 SV=1
Unigene0000627	1720	32	1405	sp|Q9FGH4|E139_ARATH	476	1	448	42.3	461	250	16	364.4	2.4e-99	sp|Q9FGH4|E139_ARATH Glucan endo-1,3-beta-glucosidase 9 OS=Arabidopsis thaliana OX=3702 GN=At5g58480 PE=2 SV=1
Unigene0000627	1720	68	1396	sp|Q94G86|ALL9_OLEEU	460	13	456	30.7	453	295	19	221.5	2.5e-56	sp|Q94G86|ALL9_OLEEU Glucan endo-1,3-beta-D-glucosidase OS=Olea europaea OX=4146 GN=OLE9 PE=1 SV=1
Unigene0000627	1720	119	1393	sp|Q9C7U5|E132_ARATH	505	32	452	33	437	265	28	219.5	9.6e-56	sp|Q9C7U5|E132_ARATH Glucan endo-1,3-beta-glucosidase 2 OS=Arabidopsis thaliana OX=3702 GN=At1g66250 PE=2 SV=2
Unigene0000627	1720	113	1081	sp|A7PQW3|E13B_VITVI	344	28	344	35.5	324	201	8	214.2	4.0e-54	sp|A7PQW3|E13B_VITVI Glucan endo-1,3-beta-glucosidase OS=Vitis vinifera OX=29760 GN=VIT_06s0061g00120 PE=1 SV=2
Unigene0000627	1720	119	1396	sp|Q9M069|E137_ARATH	504	26	448	31.5	438	273	27	208	2.9e-52	sp|Q9M069|E137_ARATH Glucan endo-1,3-beta-glucosidase 7 OS=Arabidopsis thaliana OX=3702 GN=At4g34480 PE=1 SV=2
Unigene0000627	1720	122	1072	sp|P36401|E13H_TOBAC	339	27	336	35.8	318	195	9	202.2	1.6e-50	sp|P36401|E13H_TOBAC Glucan endo-1,3-beta-glucosidase, acidic isoform PR-Q' OS=Nicotiana tabacum OX=4097 PE=1 SV=1
Unigene0000627	1720	50	1072	sp|P52408|E13B_PRUPE	350	13	347	33.4	347	213	18	198.7	1.8e-49	sp|P52408|E13B_PRUPE Glucan endo-1,3-beta-glucosidase, basic isoform OS=Prunus persica OX=3760 GN=GNS1 PE=3 SV=1
Unigene0000627	1720	59	1075	sp|Q03773|E13A_SOYBN	347	18	345	33.2	343	210	19	196.8	6.7e-49	sp|Q03773|E13A_SOYBN Glucan endo-1,3-beta-glucosidase OS=Glycine max OX=3847 PE=1 SV=1
Unigene0000627	1720	50	1396	sp|Q06915|EA6_ARATH	478	4	474	31	481	290	42	196.8	6.7e-49	sp|Q06915|EA6_ARATH Probable glucan endo-1,3-beta-glucosidase A6 OS=Arabidopsis thaliana OX=3702 GN=A6 PE=2 SV=1
Unigene0000627	1720	77	1072	sp|P07979|GUB_NICPL	370	22	344	33.8	334	208	13	196.4	8.7e-49	sp|P07979|GUB_NICPL Lichenase OS=Nicotiana plumbaginifolia OX=4092 GN=GN1 PE=2 SV=3
Unigene0000627	1720	119	1075	sp|Q01413|E13B_SOLLC	360	27	338	34.1	320	202	9	190.7	4.8e-47	sp|Q01413|E13B_SOLLC Glucan endo-1,3-beta-glucosidase B OS=Solanum lycopersicum OX=4081 PE=2 SV=1
Unigene0000627	1720	119	1075	sp|P52401|E132_SOLTU	363	27	338	33.4	320	204	9	189.1	1.4e-46	sp|P52401|E132_SOLTU Glucan endo-1,3-beta-glucosidase, basic isoform 2 OS=Solanum tuberosum OX=4113 GN=GLUB2 PE=2 SV=1
Unigene0000627	1720	119	1075	sp|P52400|E131_SOLTU	337	1	312	33.4	320	204	9	188.7	1.8e-46	sp|P52400|E131_SOLTU Glucan endo-1,3-beta-glucosidase, basic isoform 1 (Fragment) OS=Solanum tuberosum OX=4113 GN=GLUB1 PE=2 SV=1
Unigene0000627	1720	113	1075	sp|P52399|E13L_TOBAC	356	30	341	33.1	323	203	13	188.7	1.8e-46	sp|P52399|E13L_TOBAC Glucan endo-1,3-beta-glucosidase, acidic isoform GL153 OS=Nicotiana tabacum OX=4097 GN=GGL4 PE=2 SV=1
Unigene0000627	1720	50	1090	sp|P23546|E13E_TOBAC	370	12	351	32.3	350	224	13	188	3.1e-46	sp|P23546|E13E_TOBAC Glucan endo-1,3-beta-glucosidase, basic vacuolar isoform GGIB50 OS=Nicotiana tabacum OX=4097 PE=1 SV=1
Unigene0000627	1720	50	1090	sp|P27666|E13F_TOBAC	370	12	351	32.3	350	224	13	188	3.1e-46	sp|P27666|E13F_TOBAC Glucan endo-1,3-beta-glucosidase, basic vacuolar isoform GLB OS=Nicotiana tabacum OX=4097 PE=2 SV=1
Unigene0000627	1720	50	1090	sp|P15797|E13B_TOBAC	371	13	352	32.3	350	224	13	187.2	5.3e-46	sp|P15797|E13B_TOBAC Glucan endo-1,3-beta-glucosidase, basic vacuolar isoform OS=Nicotiana tabacum OX=4097 PE=1 SV=2
Unigene0000630	2211	2125	146	sp|P78695|BIP_NEUCR	661	10	661	85.6	660	87	8	1087	0.0e+00	sp|P78695|BIP_NEUCR Endoplasmic reticulum chaperone BiP OS=Neurospora crassa (strain ATCC 24698 / 74-OR23-1A / CBS 708.71 / DSM 1257 / FGSC 987) OX=367110 GN=grp78 PE=3 SV=3
Unigene0000630	2211	2128	146	sp|P59769|BIP_ASPAW	672	13	672	84.3	662	101	3	1086.2	0.0e+00	sp|P59769|BIP_ASPAW Endoplasmic reticulum chaperone BiP OS=Aspergillus awamori OX=105351 GN=bipA PE=2 SV=1
Unigene0000630	2211	2128	146	sp|P83617|BIP_ASPKA	672	13	672	84.3	662	101	3	1086.2	0.0e+00	sp|P83617|BIP_ASPKA Endoplasmic reticulum chaperone BiP OS=Aspergillus kawachii OX=1069201 GN=bipA PE=3 SV=1
Unigene0000630	2211	2128	146	sp|P83616|BIP_ASPNG	672	13	672	84.3	662	101	3	1086.2	0.0e+00	sp|P83616|BIP_ASPNG Endoplasmic reticulum chaperone BiP OS=Aspergillus niger OX=5061 GN=bipA PE=2 SV=1
Unigene0000630	2211	2110	146	sp|Q99170|BIP_YARLI	670	10	670	74.5	664	157	12	949.1	3.0e-275	sp|Q99170|BIP_YARLI Endoplasmic reticulum chaperone BiP OS=Yarrowia lipolytica (strain CLIB 122 / E 150) OX=284591 GN=KAR2 PE=3 SV=1
Unigene0000630	2211	2125	146	sp|Q9HG01|BIP_PICAN	665	9	665	71.5	664	178	11	918.7	4.3e-266	sp|Q9HG01|BIP_PICAN Endoplasmic reticulum chaperone BiP OS=Pichia angusta OX=870730 GN=BiP PE=3 SV=1
Unigene0000630	2211	2107	149	sp|P36604|BIP_SCHPO	663	12	658	71.4	654	179	8	917.5	9.5e-266	sp|P36604|BIP_SCHPO Endoplasmic reticulum chaperone BiP OS=Schizosaccharomyces pombe (strain 972 / ATCC 24843) OX=284812 GN=bip1 PE=3 SV=2
Unigene0000630	2211	2131	170	sp|P16474|BIP_YEAST	682	11	664	72.3	656	178	4	917.1	1.2e-265	sp|P16474|BIP_YEAST Endoplasmic reticulum chaperone BiP OS=Saccharomyces cerevisiae (strain ATCC 204508 / S288c) OX=559292 GN=KAR2 PE=1 SV=1
Unigene0000630	2211	2122	149	sp|Q6BZH1|BIP_DEBHA	683	12	672	71.3	663	183	7	911.4	6.8e-264	sp|Q6BZH1|BIP_DEBHA Endoplasmic reticulum chaperone BiP OS=Debaryomyces hansenii (strain ATCC 36239 / CBS 767 / BCRC 21394 / JCM 1990 / NBRC 0083 / IGC 2968) OX=284592 GN=KAR2 PE=3 SV=1
Unigene0000630	2211	2119	167	sp|Q6FW50|BIP_CANGA	667	8	653	71.8	653	175	9	901.4	7.1e-261	sp|Q6FW50|BIP_CANGA Endoplasmic reticulum chaperone BiP OS=Candida glabrata (strain ATCC 2001 / BCRC 20586 / JCM 3761 / NBRC 0622 / NRRL Y-65 / CBS 138) OX=284593 GN=KAR2 PE=3 SV=1
Unigene0000630	2211	2155	146	sp|Q75C78|BIP_EREGS	674	1	674	67.8	678	206	12	888.6	4.7e-257	sp|Q75C78|BIP_EREGS Endoplasmic reticulum chaperone BiP OS=Eremothecium gossypii (strain ATCC 10895 / CBS 109.51 / FGSC 9923 / NRRL Y-1056) OX=284811 GN=KAR2 PE=3 SV=1
Unigene0000630	2211	2032	149	sp|P19208|HSP7C_CAEBR	661	29	657	69.4	631	188	5	864.4	9.6e-250	sp|P19208|HSP7C_CAEBR Heat shock 70 kDa protein C OS=Caenorhabditis briggsae OX=6238 GN=hsp-3 PE=3 SV=2
Unigene0000630	2211	2155	146	sp|P22010|BIP_KLULA	679	1	679	67.3	681	210	13	862.4	3.6e-249	sp|P22010|BIP_KLULA Endoplasmic reticulum chaperone BiP OS=Kluyveromyces lactis (strain ATCC 8585 / CBS 2359 / DSM 70799 / NBRC 1267 / NRRL Y-1140 / WM37) OX=284590 GN=GRP78 PE=3 SV=1
Unigene0000630	2211	2032	146	sp|Q90593|BIP_CHICK	652	22	652	68.5	632	195	4	853.2	2.2e-246	sp|Q90593|BIP_CHICK Endoplasmic reticulum chaperone BiP OS=Gallus gallus OX=9031 GN=HSPA5 PE=1 SV=1
Unigene0000630	2211	2101	146	sp|P29844|BIP_DROME	656	3	656	65.5	656	220	6	850.9	1.1e-245	sp|P29844|BIP_DROME Endoplasmic reticulum chaperone BiP OS=Drosophila melanogaster OX=7227 GN=Hsc70-3 PE=1 SV=2
Unigene0000630	2211	2056	146	sp|Q0VCX2|BIP_BOVIN	655	17	655	67.2	640	206	4	850.1	1.9e-245	sp|Q0VCX2|BIP_BOVIN Endoplasmic reticulum chaperone BiP OS=Bos taurus OX=9913 GN=HSPA5 PE=2 SV=1
Unigene0000630	2211	2053	146	sp|G3I8R9|BIP_CRIGR	654	17	654	67.1	639	206	4	848.6	5.4e-245	sp|G3I8R9|BIP_CRIGR Endoplasmic reticulum chaperone BiP OS=Cricetulus griseus OX=10029 GN=HSPA5 PE=1 SV=1
Unigene0000630	2211	2053	146	sp|P07823|BIP_MESAU	654	17	654	67.1	639	206	4	848.6	5.4e-245	sp|P07823|BIP_MESAU Endoplasmic reticulum chaperone BiP OS=Mesocricetus auratus OX=10036 GN=HSPA5 PE=1 SV=1
Unigene0000630	2211	2053	146	sp|P20029|BIP_MOUSE	655	18	655	67.1	639	206	4	847.8	9.3e-245	sp|P20029|BIP_MOUSE Endoplasmic reticulum chaperone BiP OS=Mus musculus OX=10090 GN=Hspa5 PE=1 SV=3
Unigene0000630	2211	2053	146	sp|P06761|BIP_RAT	654	17	654	67.1	639	206	4	847.4	1.2e-244	sp|P06761|BIP_RAT Endoplasmic reticulum chaperone BiP OS=Rattus norvegicus OX=10116 GN=Hspa5 PE=1 SV=1
Unigene0000632	1813	1619	105	sp|P0CV95|NES2_FRAAN	578	75	576	44.7	508	272	9	476.1	6.0e-133	sp|P0CV95|NES2_FRAAN (3S,6E)-nerolidol synthase 2, chloroplastic/mitochondrial OS=Fragaria ananassa OX=3747 PE=1 SV=1
Unigene0000632	1813	1619	105	sp|P0CV94|NES1_FRAAN	519	16	517	45.5	508	268	9	474.6	1.7e-132	sp|P0CV94|NES1_FRAAN (3S,6E)-nerolidol synthase 1 OS=Fragaria ananassa OX=3747 PE=1 SV=1
Unigene0000632	1813	1658	105	sp|B9RXW4|TPS13_RICCO	572	46	570	44	532	277	21	474.6	1.7e-132	sp|B9RXW4|TPS13_RICCO Probable terpene synthase 13 OS=Ricinus communis OX=3988 GN=TPS13 PE=3 SV=1
Unigene0000632	1813	1679	105	sp|B9RHX7|TPS4_RICCO	563	23	561	43	542	289	20	465.7	8.1e-130	sp|B9RHX7|TPS4_RICCO Probable terpene synthase 4 OS=Ricinus communis OX=3988 GN=TPS4 PE=3 SV=1
Unigene0000632	1813	1619	105	sp|P0CV96|NES1_FRAVE	580	77	578	43.9	508	276	9	464.9	1.4e-129	sp|P0CV96|NES1_FRAVE (3S,6E)-nerolidol synthase 1, chloroplastic OS=Fragaria vesca OX=57918 PE=1 SV=1
Unigene0000632	1813	1556	117	sp|Q6ZH94|LINS_ORYSJ	595	110	594	42.8	491	264	17	442.2	9.6e-123	sp|Q6ZH94|LINS_ORYSJ S-(+)-linalool synthase, chloroplastic OS=Oryza sativa subsp. japonica OX=39947 GN=LIS PE=2 SV=1
Unigene0000632	1813	1556	114	sp|Q29VN2|TPS2_MAIZE	581	96	580	43	491	264	16	435.3	1.2e-120	sp|Q29VN2|TPS2_MAIZE Terpene synthase 2, chloroplastic OS=Zea mays OX=4577 GN=TPS2 PE=1 SV=1
Unigene0000632	1813	1613	117	sp|Q84UV0|LINS_ARATH	569	72	569	42.3	506	277	15	414.8	1.6e-114	sp|Q84UV0|LINS_ARATH S-(+)-linalool synthase, chloroplastic OS=Arabidopsis thaliana OX=3702 GN=TPS14 PE=1 SV=2
Unigene0000632	1813	1568	120	sp|I1M2G5|NES_SOYBN	534	25	511	43.5	487	271	4	414.1	2.8e-114	sp|I1M2G5|NES_SOYBN Neryl diphosphate diphosphatase, chloroplastic OS=Glycine max OX=3847 GN=NES PE=1 SV=1
Unigene0000632	1813	1556	114	sp|Q29VN1|TPS3_MAIZE	574	95	573	41	495	262	30	404.8	1.7e-111	sp|Q29VN1|TPS3_MAIZE Probable terpene synthase 3, chloroplastic OS=Zea mays OX=4577 GN=TPS3 PE=2 SV=1
Unigene0000632	1813	1580	117	sp|Q84NC8|TPS1_ANTMA	579	88	577	40.9	491	286	4	397.9	2.1e-109	sp|Q84NC8|TPS1_ANTMA Tricyclene synthase 0e23, chloroplastic OS=Antirrhinum majus OX=4151 GN=0e23 PE=1 SV=1
Unigene0000632	1813	1568	117	sp|Q84ND0|TPS2_ANTMA	581	94	579	41.3	489	279	8	396.7	4.6e-109	sp|Q84ND0|TPS2_ANTMA Tricyclene synthase Oc15, chloroplastic OS=Antirrhinum majus OX=4151 GN=Oc15 PE=1 SV=1
Unigene0000632	1813	1568	117	sp|Q84NC9|TPS3_ANTMA	584	97	582	41.3	489	279	8	396.7	4.6e-109	sp|Q84NC9|TPS3_ANTMA Tricyclene synthase 1e20, chloroplastic OS=Antirrhinum majus OX=4151 GN=1e20 PE=1 SV=1
Unigene0000632	1813	1607	105	sp|R4YVJ8|TPS8_COFAR	580	86	578	39.2	503	294	12	392.1	1.1e-107	sp|R4YVJ8|TPS8_COFAR Putative monoterpene synthase 8 OS=Coffea arabica OX=13443 GN=TPS8 PE=2 SV=2
Unigene0000632	1813	1808	105	sp|Q93X23|MYRS_QUEIL	597	27	592	37.5	574	345	14	390.6	3.3e-107	sp|Q93X23|MYRS_QUEIL Myrcene synthase, chloroplastic OS=Quercus ilex OX=58334 PE=1 SV=1
Unigene0000632	1813	1766	105	sp|Q6PWU2|ATESY_VITVI	590	21	584	36.8	570	338	22	387.5	2.8e-106	sp|Q6PWU2|ATESY_VITVI (-)-alpha-terpineol synthase OS=Vitis vinifera OX=29760 PE=1 SV=1
Unigene0000632	1813	1691	162	sp|G0Y7D1|TPS1_LITCU	582	53	556	39.5	512	300	10	386	8.2e-106	sp|G0Y7D1|TPS1_LITCU Trans-ocimene synthase, chloroplastic OS=Litsea cubeba OX=155299 GN=TPS1 PE=1 SV=1
Unigene0000632	1813	1580	117	sp|B9RHP7|TPS11_RICCO	572	75	557	39.4	490	288	9	377.9	2.2e-103	sp|B9RHP7|TPS11_RICCO Probable terpene synthase 11 OS=Ricinus communis OX=3988 GN=TPS11 PE=3 SV=1
Unigene0000632	1813	1751	93	sp|B3TPQ7|ATESY_MAGGA	592	40	591	37.1	561	336	17	360.5	3.7e-98	sp|B3TPQ7|ATESY_MAGGA Alpha-terpineol synthase, chloroplastic OS=Magnolia grandiflora OX=3406 PE=1 SV=1
Unigene0000632	1813	1613	105	sp|B9T536|TPS10_RICCO	551	40	549	37.5	512	309	11	358.6	1.4e-97	sp|B9T536|TPS10_RICCO Terpene synthase 10 OS=Ricinus communis OX=3988 GN=TPS10 PE=2 SV=1
Unigene0000634	920	885	358	sp|Q10101|RS7_SCHPO	195	12	187	67	176	58	0	238	1.4e-61	sp|Q10101|RS7_SCHPO Small ribosomal subunit protein eS7 OS=Schizosaccharomyces pombe (strain 972 / ATCC 24843) OX=284812 GN=rps7 PE=1 SV=2
Unigene0000634	920	876	364	sp|Q5AJ93|RS7A_CANAL	186	10	179	65.5	171	58	1	223.4	3.6e-57	sp|Q5AJ93|RS7A_CANAL Small ribosomal subunit protein eS7 OS=Candida albicans (strain SC5314 / ATCC MYA-2876) OX=237561 GN=RPS7A PE=1 SV=1
Unigene0000634	920	885	364	sp|P26786|RS7A_YEAST	190	10	183	63.8	174	63	0	223.4	3.6e-57	sp|P26786|RS7A_YEAST Small ribosomal subunit protein eS7A OS=Saccharomyces cerevisiae (strain ATCC 204508 / S288c) OX=559292 GN=RPS7A PE=1 SV=4
Unigene0000634	920	885	364	sp|P48164|RS7B_YEAST	190	10	183	60.9	174	68	0	218.8	8.8e-56	sp|P48164|RS7B_YEAST Small ribosomal subunit protein eS7B OS=Saccharomyces cerevisiae (strain ATCC 204508 / S288c) OX=559292 GN=RPS7B PE=1 SV=1
Unigene0000634	920	897	358	sp|O43105|RS7_NEUCR	202	11	195	60	185	69	5	215.3	9.7e-55	sp|O43105|RS7_NEUCR Small ribosomal subunit protein eS7 OS=Neurospora crassa (strain ATCC 24698 / 74-OR23-1A / CBS 708.71 / DSM 1257 / FGSC 987) OX=367110 GN=crp-15 PE=1 SV=2
Unigene0000634	920	876	352	sp|A6H769|RS7_BOVIN	194	16	191	59.9	177	68	3	204.5	1.7e-51	sp|A6H769|RS7_BOVIN Small ribosomal subunit protein eS7 OS=Bos taurus OX=9913 GN=RPS7 PE=1 SV=1
Unigene0000634	920	876	352	sp|Q5RT64|RS7_FELCA	194	16	191	59.9	177	68	3	204.5	1.7e-51	sp|Q5RT64|RS7_FELCA Small ribosomal subunit protein eS7 OS=Felis catus OX=9685 GN=RPS7 PE=2 SV=1
Unigene0000634	920	876	352	sp|P62081|RS7_HUMAN	194	16	191	59.9	177	68	3	204.5	1.7e-51	sp|P62081|RS7_HUMAN Small ribosomal subunit protein eS7 OS=Homo sapiens OX=9606 GN=RPS7 PE=1 SV=1
Unigene0000634	920	876	352	sp|P62082|RS7_MOUSE	194	16	191	59.9	177	68	3	204.5	1.7e-51	sp|P62082|RS7_MOUSE Small ribosomal subunit protein eS7 OS=Mus musculus OX=10090 GN=Rps7 PE=1 SV=1
Unigene0000634	920	876	352	sp|G1SVB0|RS7_RABIT	194	16	191	59.9	177	68	3	204.5	1.7e-51	sp|G1SVB0|RS7_RABIT Small ribosomal subunit protein eS7 OS=Oryctolagus cuniculus OX=9986 GN=RPS7 PE=1 SV=3
Unigene0000634	920	876	352	sp|P62083|RS7_RAT	194	16	191	59.9	177	68	3	204.5	1.7e-51	sp|P62083|RS7_RAT Small ribosomal subunit protein eS7 OS=Rattus norvegicus OX=10116 GN=Rps7 PE=1 SV=1
Unigene0000634	920	876	352	sp|P02362|RS7_XENLA	194	16	191	58.2	177	71	3	200.7	2.5e-50	sp|P02362|RS7_XENLA Small ribosomal subunit protein eS7 OS=Xenopus laevis OX=8355 GN=rps7 PE=1 SV=2
Unigene0000634	920	876	352	sp|Q90YR7|RS7_ICTPU	194	16	191	58.2	177	71	3	199.5	5.5e-50	sp|Q90YR7|RS7_ICTPU Small ribosomal subunit protein eS7 OS=Ictalurus punctatus OX=7998 GN=rps7 PE=2 SV=1
Unigene0000634	920	876	352	sp|P50894|RS7_TAKRU	194	16	191	58.2	177	71	3	198.7	9.4e-50	sp|P50894|RS7_TAKRU Small ribosomal subunit protein eS7 OS=Takifugu rubripes OX=31033 GN=rps7 PE=3 SV=1
Unigene0000634	920	876	352	sp|P62084|RS7_DANRE	194	16	191	57.6	177	72	3	196.8	3.6e-49	sp|P62084|RS7_DANRE Small ribosomal subunit protein eS7 OS=Danio rerio OX=7955 GN=rps7 PE=1 SV=1
Unigene0000634	920	918	352	sp|Q962S0|RS7_SPOFR	190	2	187	52.9	191	83	7	189.5	5.7e-47	sp|Q962S0|RS7_SPOFR Small ribosomal subunit protein eS7 OS=Spodoptera frugiperda OX=7108 GN=RpS7 PE=2 SV=1
Unigene0000634	920	864	352	sp|P48155|RS7_MANSE	190	17	187	56.1	173	72	4	188.7	9.7e-47	sp|P48155|RS7_MANSE Small ribosomal subunit protein eS7 OS=Manduca sexta OX=7130 GN=RpS7 PE=2 SV=1
Unigene0000634	920	876	352	sp|Q9NB21|RS7_CULQU	192	15	189	55.9	177	74	4	188.3	1.3e-46	sp|Q9NB21|RS7_CULQU Small ribosomal subunit protein eS7 OS=Culex quinquefasciatus OX=7176 GN=RpS7 PE=2 SV=1
Unigene0000634	920	903	352	sp|P33514|RS7_ANOGA	192	6	189	52.7	186	84	4	187.2	2.8e-46	sp|P33514|RS7_ANOGA Small ribosomal subunit protein eS7 OS=Anopheles gambiae OX=7165 GN=RpS7 PE=2 SV=2
Unigene0000634	920	882	352	sp|P62085|RS7_DROYA	194	13	189	53.1	179	80	4	181.4	1.6e-44	sp|P62085|RS7_DROYA Small ribosomal subunit protein eS7 OS=Drosophila yakuba OX=7245 GN=RpS7 PE=2 SV=1
Unigene0000635	1834	115	1644	sp|Q3HRQ2|GLOX_VITPS	523	13	522	65.1	516	168	12	692.6	4.1e-198	sp|Q3HRQ2|GLOX_VITPS Aldehyde oxidase GLOX OS=Vitis pseudoreticulata OX=231512 GN=GLOX PE=2 SV=1
Unigene0000635	1834	118	1644	sp|Q9FYG4|GLOX1_ARATH	615	95	615	40.1	526	293	22	394.8	1.8e-108	sp|Q9FYG4|GLOX1_ARATH Aldehyde oxidase GLOX1 OS=Arabidopsis thaliana OX=3702 GN=GLOX1 PE=2 SV=1
Unigene0000635	1834	121	1641	sp|A0A2H4HHY6|GLOX_ARTAN	594	68	593	39.3	539	282	45	383.3	5.4e-105	sp|A0A2H4HHY6|GLOX_ARTAN Putative aldehyde oxidase Art an 7 OS=Artemisia annua OX=35608 PE=1 SV=1
Unigene0000635	1834	106	1647	sp|Q01772|GLOX_PHACH	559	20	551	30.3	564	311	82	217.6	3.9e-55	sp|Q01772|GLOX_PHACH Aldehyde oxidase GLOX OS=Phanerodontia chrysosporium OX=2822231 GN=GLX PE=1 SV=1
Unigene0000638	411	410	3	sp|C8V8H5|IES1_EMENI	780	38	173	93.4	136	9	0	265.4	3.7e-70	sp|C8V8H5|IES1_EMENI Ino eighty subunit 1 OS=Emericella nidulans (strain FGSC A4 / ATCC 38163 / CBS 112.46 / NRRL 194 / M139) OX=227321 GN=AN10560 PE=3 SV=1
Unigene0000638	411	377	3	sp|P43579|IES1_YEAST	692	124	278	42	157	57	34	104.4	1.1e-21	sp|P43579|IES1_YEAST Ino eighty subunit 1 OS=Saccharomyces cerevisiae (strain ATCC 204508 / S288c) OX=559292 GN=IES1 PE=1 SV=1
Unigene0000642	2723	2471	357	sp|Q5SMU7|ORC1_ORYSJ	814	118	814	69.4	707	204	12	1033.1	1.9e-300	sp|Q5SMU7|ORC1_ORYSJ Origin of replication complex subunit 1 OS=Oryza sativa subsp. japonica OX=39947 GN=ORC1 PE=2 SV=1
Unigene0000642	2723	2567	357	sp|Q710E8|ORC1A_ARATH	809	94	809	65.1	745	223	37	959.5	2.7e-278	sp|Q710E8|ORC1A_ARATH Origin of replication complex subunit 1A OS=Arabidopsis thaliana OX=3702 GN=ORC1A PE=1 SV=1
Unigene0000642	2723	2636	357	sp|Q9SU24|ORC1B_ARATH	813	78	813	62.8	766	249	36	958	7.8e-278	sp|Q9SU24|ORC1B_ARATH Origin of replication complex subunit 1B OS=Arabidopsis thaliana OX=3702 GN=ORC1B PE=1 SV=1
Unigene0000642	2723	1559	390	sp|Q13415|ORC1_HUMAN	861	488	860	40.9	391	212	19	299.7	1.2e-79	sp|Q13415|ORC1_HUMAN Origin recognition complex subunit 1 OS=Homo sapiens OX=9606 GN=ORC1 PE=1 SV=2
Unigene0000642	2723	1559	390	sp|Q58DC8|ORC1_BOVIN	863	490	862	41.4	391	210	19	295.8	1.7e-78	sp|Q58DC8|ORC1_BOVIN Origin recognition complex subunit 1 OS=Bos taurus OX=9913 GN=ORC1 PE=2 SV=2
Unigene0000642	2723	1568	393	sp|O16810|ORC1_DROME	924	549	918	41.3	395	204	28	295.4	2.2e-78	sp|O16810|ORC1_DROME Origin recognition complex subunit 1 OS=Drosophila melanogaster OX=7227 GN=Orc1 PE=1 SV=2
Unigene0000642	2723	1559	390	sp|Q80Z32|ORC1_RAT	848	475	847	40.4	391	214	19	292	2.4e-77	sp|Q80Z32|ORC1_RAT Origin recognition complex subunit 1 OS=Rattus norvegicus OX=10116 GN=Orc1 PE=2 SV=1
Unigene0000642	2723	1559	390	sp|Q9JI69|ORC1_CRIGR	850	477	849	40.2	393	212	23	289.3	1.6e-76	sp|Q9JI69|ORC1_CRIGR Origin recognition complex subunit 1 OS=Cricetulus griseus OX=10029 GN=ORC1 PE=2 SV=1
Unigene0000642	2723	1559	390	sp|Q9Z1N2|ORC1_MOUSE	840	467	839	40.2	391	215	19	285.4	2.3e-75	sp|Q9Z1N2|ORC1_MOUSE Origin recognition complex subunit 1 OS=Mus musculus OX=10090 GN=Orc1 PE=1 SV=2
Unigene0000642	2723	1553	594	sp|P54789|ORC1_SCHPO	707	324	623	43.2	324	156	28	245.7	2.0e-63	sp|P54789|ORC1_SCHPO Origin recognition complex subunit 1 OS=Schizosaccharomyces pombe (strain 972 / ATCC 24843) OX=284812 GN=orc1 PE=1 SV=1
Unigene0000642	2723	1553	378	sp|Q54RM2|ORC1_DICDI	631	220	623	34.9	407	247	18	243	1.3e-62	sp|Q54RM2|ORC1_DICDI Origin recognition complex subunit 1 OS=Dictyostelium discoideum OX=44689 GN=orcA PE=3 SV=1
Unigene0000642	2723	1556	594	sp|Q6BSE2|ORC1_DEBHA	810	378	698	39.5	329	183	16	208.4	3.5e-52	sp|Q6BSE2|ORC1_DEBHA Origin recognition complex subunit 1 OS=Debaryomyces hansenii (strain ATCC 36239 / CBS 767 / BCRC 21394 / JCM 1990 / NBRC 0083 / IGC 2968) OX=284592 GN=ORC1 PE=3 SV=2
Unigene0000642	2723	1595	594	sp|O74270|ORC1_CANAX	805	370	699	35.4	342	201	20	197.2	8.1e-49	sp|O74270|ORC1_CANAX Origin recognition complex subunit 1 OS=Candida albicans OX=5476 GN=ORC1 PE=2 SV=1
Unigene0000642	2723	1556	819	sp|Q8I615|ORC1_PLAF7	1189	769	1014	39.4	249	145	6	180.3	1.0e-43	sp|Q8I615|ORC1_PLAF7 Origin recognition complex subunit 1 OS=Plasmodium falciparum (isolate 3D7) OX=36329 GN=ORC1 PE=1 SV=1
Unigene0000642	2723	1511	810	sp|P54784|ORC1_YEAST	914	449	718	37.4	273	129	42	171	6.2e-41	sp|P54784|ORC1_YEAST Origin recognition complex subunit 1 OS=Saccharomyces cerevisiae (strain ATCC 204508 / S288c) OX=559292 GN=ORC1 PE=1 SV=1
Unigene0000642	2723	1559	393	sp|Q5N897|CDC6_ORYSJ	515	122	501	29.5	396	256	23	161.8	3.8e-38	sp|Q5N897|CDC6_ORYSJ Cell division control protein 6 homolog OS=Oryza sativa subsp. japonica OX=39947 GN=CDC6 PE=2 SV=1
Unigene0000642	2723	1568	390	sp|Q8W032|CDC6B_ARATH	505	107	496	27	400	275	17	158.3	4.2e-37	sp|Q8W032|CDC6B_ARATH Cell division control protein 6 homolog B OS=Arabidopsis thaliana OX=3702 GN=CDC6B PE=2 SV=1
Unigene0000642	2723	1583	396	sp|O89033|CDC6_MOUSE	562	149	547	28.4	408	271	21	158.3	4.2e-37	sp|O89033|CDC6_MOUSE Cell division control protein 6 homolog OS=Mus musculus OX=10090 GN=Cdc6 PE=1 SV=2
Unigene0000642	2723	1601	390	sp|Q99741|CDC6_HUMAN	560	141	547	28	415	280	19	157.5	7.1e-37	sp|Q99741|CDC6_HUMAN Cell division control protein 6 homolog OS=Homo sapiens OX=9606 GN=CDC6 PE=1 SV=1
Unigene0000642	2723	1571	927	sp|P54788|ORC1_KLULA	886	420	633	36.5	219	130	9	142.1	3.1e-32	sp|P54788|ORC1_KLULA Origin recognition complex subunit 1 OS=Kluyveromyces lactis (strain ATCC 8585 / CBS 2359 / DSM 70799 / NBRC 1267 / NRRL Y-1140 / WM37) OX=284590 GN=ORC1 PE=3 SV=2
Unigene0000647	828	817	77	sp|O60128|RS3_SCHPO	249	3	246	72.9	247	64	3	334.7	9.9e-91	sp|O60128|RS3_SCHPO Small ribosomal subunit protein uS3 OS=Schizosaccharomyces pombe (strain 972 / ATCC 24843) OX=284812 GN=rps3 PE=1 SV=1
Unigene0000647	828	814	101	sp|P79891|RS3_AMBME	253	2	239	71	238	69	0	321.2	1.1e-86	sp|P79891|RS3_AMBME Small ribosomal subunit protein uS3 OS=Ambystoma mexicanum OX=8296 GN=RPS3 PE=2 SV=1
Unigene0000647	828	814	98	sp|Q9SIP7|RS3A_ARATH	250	2	237	69.5	239	70	3	320.1	2.5e-86	sp|Q9SIP7|RS3A_ARATH Small ribosomal subunit protein uS3z OS=Arabidopsis thaliana OX=3702 GN=RPS3A PE=1 SV=1
Unigene0000647	828	814	89	sp|Q3T169|RS3_BOVIN	243	2	243	71.1	242	70	0	320.1	2.5e-86	sp|Q3T169|RS3_BOVIN Small ribosomal subunit protein uS3 OS=Bos taurus OX=9913 GN=RPS3 PE=2 SV=1
Unigene0000647	828	814	89	sp|P23396|RS3_HUMAN	243	2	243	71.1	242	70	0	320.1	2.5e-86	sp|P23396|RS3_HUMAN Small ribosomal subunit protein uS3 OS=Homo sapiens OX=9606 GN=RPS3 PE=1 SV=2
Unigene0000647	828	814	89	sp|Q0Z8U2|RS3_PIG	243	2	243	71.1	242	70	0	320.1	2.5e-86	sp|Q0Z8U2|RS3_PIG Small ribosomal subunit protein uS3 OS=Sus scrofa OX=9823 GN=RPS3 PE=1 SV=1
Unigene0000647	828	814	98	sp|Q9FJA6|RS33_ARATH	248	2	247	68.3	246	71	7	319.7	3.3e-86	sp|Q9FJA6|RS33_ARATH Small ribosomal subunit protein uS3x OS=Arabidopsis thaliana OX=3702 GN=RPS3C PE=1 SV=1
Unigene0000647	828	814	89	sp|P02350|RS3A_XENLA	246	2	244	70.4	243	71	1	319.7	3.3e-86	sp|P02350|RS3A_XENLA Small ribosomal subunit protein uS3A OS=Xenopus laevis OX=8355 GN=rps3-a PE=2 SV=2
Unigene0000647	828	814	98	sp|Q90YS2|RS3_ICTPU	245	2	235	70.7	239	65	5	319.7	3.3e-86	sp|Q90YS2|RS3_ICTPU Small ribosomal subunit protein uS3 OS=Ictalurus punctatus OX=7998 GN=rps3 PE=2 SV=1
Unigene0000647	828	814	89	sp|Q5R465|RS3_PONAB	243	2	243	71.1	242	70	0	319.3	4.3e-86	sp|Q5R465|RS3_PONAB Small ribosomal subunit protein uS3 OS=Pongo abelii OX=9601 GN=RPS3 PE=2 SV=1
Unigene0000647	828	814	89	sp|E2RH47|RS3_CANLF	243	2	243	70.7	242	71	0	318.5	7.3e-86	sp|E2RH47|RS3_CANLF Small ribosomal subunit protein uS3 OS=Canis lupus familiaris OX=9615 GN=RPS3 PE=1 SV=1
Unigene0000647	828	814	89	sp|P62908|RS3_MOUSE	243	2	243	70.7	242	71	0	318.5	7.3e-86	sp|P62908|RS3_MOUSE Small ribosomal subunit protein uS3 OS=Mus musculus OX=10090 GN=Rps3 PE=1 SV=1
Unigene0000647	828	814	89	sp|G1TNM3|RS3_RABIT	243	2	243	70.7	242	71	0	318.5	7.3e-86	sp|G1TNM3|RS3_RABIT Small ribosomal subunit protein uS3 OS=Oryctolagus cuniculus OX=9986 GN=RPS3 PE=1 SV=3
Unigene0000647	828	814	89	sp|P62909|RS3_RAT	243	2	243	70.7	242	71	0	318.5	7.3e-86	sp|P62909|RS3_RAT Small ribosomal subunit protein uS3 OS=Rattus norvegicus OX=10116 GN=Rps3 PE=1 SV=1
Unigene0000647	828	814	89	sp|P47835|RS3B_XENLA	246	2	244	70	243	72	1	318.2	9.6e-86	sp|P47835|RS3B_XENLA Small ribosomal subunit protein uS3B OS=Xenopus laevis OX=8355 GN=rps3-b PE=2 SV=1
Unigene0000647	828	814	50	sp|Q9M339|RS3B_ARATH	249	2	248	67.5	255	75	8	317.8	1.3e-85	sp|Q9M339|RS3B_ARATH Small ribosomal subunit protein uS3y OS=Arabidopsis thaliana OX=3702 GN=RPS3B PE=1 SV=1
Unigene0000647	828	811	92	sp|P05750|RS3_YEAST	240	3	240	70	240	70	2	316.2	3.6e-85	sp|P05750|RS3_YEAST Small ribosomal subunit protein uS3 OS=Saccharomyces cerevisiae (strain ATCC 204508 / S288c) OX=559292 GN=RPS3 PE=1 SV=5
Unigene0000647	828	820	116	sp|P48153|RS3_MANSE	243	1	237	67.1	237	76	2	302.4	5.4e-81	sp|P48153|RS3_MANSE Small ribosomal subunit protein uS3 OS=Manduca sexta OX=7130 GN=RpS3 PE=2 SV=1
Unigene0000647	828	817	131	sp|Q06559|RS3_DROME	246	3	231	67.7	229	74	0	301.2	1.2e-80	sp|Q06559|RS3_DROME Small ribosomal subunit protein uS3 OS=Drosophila melanogaster OX=7227 GN=RpS3 PE=1 SV=1
Unigene0000647	828	817	74	sp|P48152|RS3_CAEEL	247	3	245	61.7	248	90	5	288.5	8.1e-77	sp|P48152|RS3_CAEEL Small ribosomal subunit protein uS3 OS=Caenorhabditis elegans OX=6239 GN=rps-3 PE=3 SV=1
Unigene0000648	2281	67	2280	sp|A0A0M3R8G2|SBT_PETHY	734	2	728	49.5	742	356	19	674.1	1.9e-192	sp|A0A0M3R8G2|SBT_PETHY Subtilisin-like protease OS=Petunia hybrida OX=4102 GN=SBT PE=2 SV=1
Unigene0000648	2281	76	2280	sp|A9QY38|SBT4_LOTJA	755	5	749	46.7	756	371	32	639	6.7e-182	sp|A9QY38|SBT4_LOTJA Subtilisin-like protease 4 OS=Lotus japonicus OX=34305 GN=SBTM4 PE=2 SV=1
Unigene0000648	2281	43	2280	sp|A9QY40|SBT1_LOTJA	750	5	744	46.6	755	379	24	633.3	3.7e-180	sp|A9QY40|SBT1_LOTJA Subtilisin-like protease 1 OS=Lotus japonicus OX=34305 GN=SBTM1 PE=2 SV=1
Unigene0000648	2281	70	2280	sp|A9QY39|SBT3_LOTJA	750	15	744	46.6	744	376	21	632.9	4.8e-180	sp|A9QY39|SBT3_LOTJA Subtilisin-like protease 3 OS=Lotus japonicus OX=34305 GN=SBTM3 PE=2 SV=1
Unigene0000648	2281	37	2280	sp|G7KEU7|SBT_MEDTR	748	1	742	45.5	759	386	28	602.4	7.0e-171	sp|G7KEU7|SBT_MEDTR Subtilisin-like protease OS=Medicago truncatula OX=3880 GN=SBT PE=2 SV=1
Unigene0000648	2281	67	2280	sp|Q9LVJ1|SBT14_ARATH	777	5	764	41.5	771	407	44	534.6	1.8e-150	sp|Q9LVJ1|SBT14_ARATH Subtilisin-like protease SBT1.4 OS=Arabidopsis thaliana OX=3702 GN=SBT1.4 PE=2 SV=1
Unigene0000648	2281	139	2280	sp|O64495|SBT12_ARATH	775	24	767	41.7	755	388	52	530.4	3.4e-149	sp|O64495|SBT12_ARATH Subtilisin-like protease SBT1.2 OS=Arabidopsis thaliana OX=3702 GN=SBT1.2 PE=2 SV=1
Unigene0000648	2281	148	2280	sp|Q9LUM3|SBT15_ARATH	775	27	766	41.5	745	397	39	529.6	5.8e-149	sp|Q9LUM3|SBT15_ARATH Subtilisin-like protease SBT1.5 OS=Arabidopsis thaliana OX=3702 GN=SBT1.5 PE=2 SV=1
Unigene0000648	2281	118	2280	sp|O65351|SBT17_ARATH	757	22	751	39.9	746	407	41	496.1	7.1e-139	sp|O65351|SBT17_ARATH Subtilisin-like protease SBT1.7 OS=Arabidopsis thaliana OX=3702 GN=SBT1.7 PE=1 SV=1
Unigene0000648	2281	145	2280	sp|Q9ZUF6|SBT18_ARATH	754	28	746	38.9	736	409	41	488	1.9e-136	sp|Q9ZUF6|SBT18_ARATH Subtilisin-like protease SBT1.8 OS=Arabidopsis thaliana OX=3702 GN=SBT1.8 PE=1 SV=1
Unigene0000648	2281	262	2280	sp|O49607|SBT16_ARATH	764	57	755	39.9	704	387	36	486.5	5.6e-136	sp|O49607|SBT16_ARATH Subtilisin-like protease SBT1.6 OS=Arabidopsis thaliana OX=3702 GN=SBT1.6 PE=2 SV=1
Unigene0000648	2281	121	2280	sp|Q84WS0|SBT11_ARATH	774	34	768	39.4	747	414	39	474.6	2.2e-132	sp|Q84WS0|SBT11_ARATH Subtilisin-like protease SBT1.1 OS=Arabidopsis thaliana OX=3702 GN=SBTI1.1 PE=1 SV=1
Unigene0000648	2281	61	2280	sp|F4JXC5|SBT54_ARATH	778	12	771	37.7	779	427	58	449.5	7.6e-125	sp|F4JXC5|SBT54_ARATH Subtilisin-like protease SBT5.4 OS=Arabidopsis thaliana OX=3702 GN=SBT5.4 PE=1 SV=1
Unigene0000648	2281	46	2280	sp|Q9FLI4|SBT13_ARATH	780	3	771	35.2	781	458	48	448	2.2e-124	sp|Q9FLI4|SBT13_ARATH Subtilisin-like protease SBT1.3 OS=Arabidopsis thaliana OX=3702 GN=SBT1.3 PE=2 SV=1
Unigene0000648	2281	97	2280	sp|Q9ZSP5|AIR3_ARATH	772	13	767	37.2	763	436	43	444.1	3.2e-123	sp|Q9ZSP5|AIR3_ARATH Subtilisin-like protease SBT5.3 OS=Arabidopsis thaliana OX=3702 GN=AIR3 PE=2 SV=1
Unigene0000648	2281	139	2280	sp|O82777|SBT3_SOLLC	761	23	751	35.7	748	428	53	405.6	1.3e-111	sp|O82777|SBT3_SOLLC Subtilisin-like protease SBT3 OS=Solanum lycopersicum OX=4081 GN=sbt3 PE=1 SV=1
Unigene0000648	2281	133	2280	sp|Q39547|CUCM1_CUCME	731	28	724	36.1	740	406	67	403.3	6.2e-111	sp|Q39547|CUCM1_CUCME Cucumisin OS=Cucumis melo OX=3656 PE=1 SV=1
Unigene0000648	2281	67	2280	sp|Q9FIG2|SBT4D_ARATH	732	3	724	36.3	753	434	46	400.6	4.0e-110	sp|Q9FIG2|SBT4D_ARATH Subtilisin-like protease SBT4.13 OS=Arabidopsis thaliana OX=3702 GN=SBT4.13 PE=2 SV=1
Unigene0000648	2281	70	2280	sp|I1N462|SBT1_SOYBN	789	8	783	36.4	785	442	57	399.1	1.2e-109	sp|I1N462|SBT1_SOYBN Subtilisin-like protease Glyma18g48580 OS=Glycine max OX=3847 GN=Glyma18g48580 PE=1 SV=3
Unigene0000648	2281	151	2280	sp|Q9LZS6|SBT4F_ARATH	766	35	755	35.4	745	422	59	397.5	3.4e-109	sp|Q9LZS6|SBT4F_ARATH Subtilisin-like protease SBT4.15 OS=Arabidopsis thaliana OX=3702 GN=SBT4.15 PE=3 SV=1
Unigene0000650	1636	1509	34	sp|Q9SRQ5|Y3351_ARATH	508	12	460	36.1	498	263	55	259.6	8.0e-68	sp|Q9SRQ5|Y3351_ARATH BTB/POZ domain-containing protein At3g03510 OS=Arabidopsis thaliana OX=3702 GN=At3g03510 PE=2 SV=2
Unigene0000650	1636	1509	184	sp|Q9LF66|Y5758_ARATH	548	8	449	36.6	451	268	18	254.6	2.6e-66	sp|Q9LF66|Y5758_ARATH BTB/POZ domain-containing protein At5g17580 OS=Arabidopsis thaliana OX=3702 GN=At5g17580 PE=2 SV=1
Unigene0000650	1636	1551	190	sp|Q94A73|Y5656_ARATH	668	8	535	33.1	540	263	98	235.7	1.2e-60	sp|Q94A73|Y5656_ARATH BTB/POZ domain-containing protein At5g66560 OS=Arabidopsis thaliana OX=3702 GN=At5g66560 PE=2 SV=2
Unigene0000650	1636	1560	169	sp|Q8LPQ3|Y3084_ARATH	569	1	472	33.8	488	283	40	232.6	1.0e-59	sp|Q8LPQ3|Y3084_ARATH BTB/POZ domain-containing protein At3g50840 OS=Arabidopsis thaliana OX=3702 GN=At3g50840 PE=2 SV=2
Unigene0000650	1636	1542	40	sp|Q9LYW0|Y5325_ARATH	592	18	556	30.4	559	311	78	225.7	1.3e-57	sp|Q9LYW0|Y5325_ARATH BTB/POZ domain-containing protein At5g03250 OS=Arabidopsis thaliana OX=3702 GN=At5g03250 PE=2 SV=1
Unigene0000650	1636	1536	40	sp|Q9FNB3|Y5360_ARATH	591	20	548	30.8	539	323	50	216.9	5.9e-55	sp|Q9FNB3|Y5360_ARATH Putative BTB/POZ domain-containing protein At5g13600 OS=Arabidopsis thaliana OX=3702 GN=At5g13600 PE=3 SV=1
Unigene0000650	1636	1515	169	sp|Q9FKB6|Y5880_ARATH	614	42	496	29.1	474	292	44	194.9	2.4e-48	sp|Q9FKB6|Y5880_ARATH BTB/POZ domain-containing protein At5g48800 OS=Arabidopsis thaliana OX=3702 GN=At5g48800 PE=2 SV=1
Unigene0000650	1636	1509	205	sp|Q9FN09|NPY3_ARATH	579	30	476	30	470	271	58	181.4	2.8e-44	sp|Q9FN09|NPY3_ARATH Phototropic-responsive NPH3 family protein NPY3 OS=Arabidopsis thaliana OX=3702 GN=NPY3 PE=2 SV=1
Unigene0000650	1636	1509	13	sp|Q9C9Z0|Y3866_ARATH	582	37	541	28.8	534	316	64	180.3	6.2e-44	sp|Q9C9Z0|Y3866_ARATH Putative BTB/POZ domain-containing protein At3g08660 OS=Arabidopsis thaliana OX=3702 GN=At3g08660 PE=3 SV=1
Unigene0000650	1636	1509	205	sp|Q0WL52|NPY5_ARATH	580	30	465	28	461	281	51	171.4	2.9e-41	sp|Q0WL52|NPY5_ARATH Phototropic-responsive NPH3 family protein NPY5 OS=Arabidopsis thaliana OX=3702 GN=NPY5 PE=1 SV=2
Unigene0000650	1636	1500	163	sp|Q9C9V6|Y1790_ARATH	631	32	523	27.6	503	296	68	171	3.7e-41	sp|Q9C9V6|Y1790_ARATH BTB/POZ domain-containing protein At1g67900 OS=Arabidopsis thaliana OX=3702 GN=At1g67900 PE=1 SV=1
Unigene0000650	1636	1500	205	sp|Q9LIM6|Y3649_ARATH	588	32	507	28.5	488	281	68	161	3.9e-38	sp|Q9LIM6|Y3649_ARATH BTB/POZ domain-containing protein At3g26490 OS=Arabidopsis thaliana OX=3702 GN=At3g26490 PE=1 SV=1
Unigene0000650	1636	1608	205	sp|Q8H1D3|NPY1_ARATH	571	2	468	26.8	497	305	59	155.6	1.6e-36	sp|Q8H1D3|NPY1_ARATH Phototropic-responsive NPH3 family protein NPY1 OS=Arabidopsis thaliana OX=3702 GN=NPY1 PE=1 SV=1
Unigene0000650	1636	1509	190	sp|Q9C9Z7|Y3857_ARATH	617	37	495	26.7	476	296	53	152.5	1.4e-35	sp|Q9C9Z7|Y3857_ARATH BTB/POZ domain-containing protein At3g08570 OS=Arabidopsis thaliana OX=3702 GN=At3g08570 PE=2 SV=2
Unigene0000650	1636	1539	190	sp|O82253|SETH6_ARATH	635	30	499	27.9	491	292	62	151.4	3.1e-35	sp|O82253|SETH6_ARATH BTB/POZ domain-containing protein SETH6 OS=Arabidopsis thaliana OX=3702 GN=SETH6 PE=3 SV=1
Unigene0000650	1636	1563	163	sp|Q9LFU0|DOT3_ARATH	607	35	506	25.9	491	321	43	144.1	4.9e-33	sp|Q9LFU0|DOT3_ARATH BTB/POZ domain-containing protein DOT3 OS=Arabidopsis thaliana OX=3702 GN=DOT3 PE=2 SV=1
Unigene0000650	1636	1485	253	sp|Q9SN21|Y3997_ARATH	515	5	393	26.9	431	253	62	142.1	1.9e-32	sp|Q9SN21|Y3997_ARATH Putative BTB/POZ domain-containing protein At3g49970 OS=Arabidopsis thaliana OX=3702 GN=At3g49970 PE=3 SV=2
Unigene0000650	1636	1521	223	sp|Q8RXR6|Y1028_ARATH	525	2	460	25.6	472	299	52	116.7	8.4e-25	sp|Q8RXR6|Y1028_ARATH BTB/POZ domain-containing protein At1g50280 OS=Arabidopsis thaliana OX=3702 GN=At1g50280 PE=2 SV=1
Unigene0000650	1636	1599	1084	sp|Q9M2W8|Y3990_ARATH	517	43	212	26	177	119	12	56.2	1.3e-06	sp|Q9M2W8|Y3990_ARATH BTB/POZ domain-containing protein At3g49900 OS=Arabidopsis thaliana OX=3702 GN=At3g49900 PE=3 SV=1
Unigene0000654	1277	1122	496	sp|Q40478|ERF5_TOBAC	291	67	281	41.5	224	107	24	145.6	1.3e-33	sp|Q40478|ERF5_TOBAC Ethylene-responsive transcription factor 5 OS=Nicotiana tabacum OX=4097 GN=ERF5 PE=2 SV=1
Unigene0000654	1277	987	469	sp|O80341|EF102_ARATH	300	118	297	45.7	188	79	23	141.4	2.5e-32	sp|O80341|EF102_ARATH Ethylene-responsive transcription factor 5 OS=Arabidopsis thaliana OX=3702 GN=ERF5 PE=2 SV=1
Unigene0000654	1277	984	496	sp|Q9FKG1|EF104_ARATH	241	54	233	44	184	78	25	138.7	1.6e-31	sp|Q9FKG1|EF104_ARATH Ethylene-responsive transcription factor ERF104 OS=Arabidopsis thaliana OX=3702 GN=ERF104 PE=1 SV=1
Unigene0000654	1277	1125	469	sp|Q8VZ91|EF103_ARATH	282	57	279	38.3	243	106	44	135.6	1.4e-30	sp|Q8VZ91|EF103_ARATH Ethylene-responsive transcription factor 6 OS=Arabidopsis thaliana OX=3702 GN=ERF6 PE=1 SV=2
Unigene0000654	1277	897	466	sp|Q8VY90|EF105_ARATH	221	65	219	48.7	158	64	17	135.2	1.8e-30	sp|Q8VY90|EF105_ARATH Ethylene-responsive transcription factor ERF105 OS=Arabidopsis thaliana OX=3702 GN=ERF105 PE=2 SV=1
Unigene0000654	1277	1101	484	sp|Q9LW48|ERF5_NICSY	282	59	279	38.6	233	104	39	132.9	8.8e-30	sp|Q9LW48|ERF5_NICSY Ethylene-responsive transcription factor 5 OS=Nicotiana sylvestris OX=4096 GN=ERF5 PE=2 SV=1
Unigene0000654	1277	972	670	sp|Q8L9K1|ERF99_ARATH	226	59	160	61.2	103	37	3	119.4	1.0e-25	sp|Q8L9K1|ERF99_ARATH Ethylene-responsive transcription factor 13 OS=Arabidopsis thaliana OX=3702 GN=ERF13 PE=1 SV=2
Unigene0000654	1277	993	670	sp|Q9LW50|ERF2_NICSY	237	68	171	54.6	108	45	4	117.1	5.0e-25	sp|Q9LW50|ERF2_NICSY Ethylene-responsive transcription factor 2 OS=Nicotiana sylvestris OX=4096 GN=ERF2 PE=2 SV=1
Unigene0000654	1277	993	670	sp|Q40479|ERF2_TOBAC	233	64	167	54.6	108	45	4	116.3	8.5e-25	sp|Q40479|ERF2_TOBAC Ethylene-responsive transcription factor 2 OS=Nicotiana tabacum OX=4097 GN=ERF2 PE=2 SV=1
Unigene0000654	1277	927	676	sp|Q9LTC5|ERF98_ARATH	139	3	86	65.5	84	29	0	115.2	1.9e-24	sp|Q9LTC5|ERF98_ARATH Ethylene-responsive transcription factor ERF098 OS=Arabidopsis thaliana OX=3702 GN=ERF098 PE=1 SV=1
Unigene0000654	1277	1014	670	sp|O80337|EF100_ARATH	268	97	216	50.8	120	54	5	111.3	2.7e-23	sp|O80337|EF100_ARATH Ethylene-responsive transcription factor 1A OS=Arabidopsis thaliana OX=3702 GN=ERF1A PE=1 SV=2
Unigene0000654	1277	888	691	sp|Q9LY05|EF106_ARATH	207	106	171	74.2	66	17	0	110.2	6.1e-23	sp|Q9LY05|EF106_ARATH Ethylene-responsive transcription factor ERF106 OS=Arabidopsis thaliana OX=3702 GN=ERF106 PE=2 SV=1
Unigene0000654	1277	954	691	sp|Q9FKG2|EF107_ARATH	201	86	168	58	88	32	5	110.2	6.1e-23	sp|Q9FKG2|EF107_ARATH Ethylene-responsive transcription factor ERF107 OS=Arabidopsis thaliana OX=3702 GN=ERF107 PE=2 SV=1
Unigene0000654	1277	1017	670	sp|Q84XB3|ERF1_SOLLC	244	63	175	53.3	122	42	15	110.2	6.1e-23	sp|Q84XB3|ERF1_SOLLC Ethylene-responsive transcription factor 1 OS=Solanum lycopersicum OX=4081 GN=ERF1 PE=2 SV=1
Unigene0000654	1277	933	646	sp|Q40476|ERF1_TOBAC	236	89	179	59.4	96	34	5	109.4	1.0e-22	sp|Q40476|ERF1_TOBAC Ethylene-responsive transcription factor 1 OS=Nicotiana tabacum OX=4097 GN=ERF1 PE=2 SV=1
Unigene0000654	1277	885	694	sp|O04681|PTI5_SOLLC	161	56	119	76.6	64	15	0	107.8	3.0e-22	sp|O04681|PTI5_SOLLC Pathogenesis-related genes transcriptional activator PTI5 OS=Solanum lycopersicum OX=4081 GN=PTI5 PE=2 SV=1
Unigene0000654	1277	882	670	sp|O80338|EF101_ARATH	243	115	185	67.6	71	23	0	106.7	6.7e-22	sp|O80338|EF101_ARATH Ethylene-responsive transcription factor 2 OS=Arabidopsis thaliana OX=3702 GN=ERF2 PE=2 SV=1
Unigene0000654	1277	921	697	sp|P93822|ERF97_ARATH	133	6	79	65.3	75	25	1	103.6	5.7e-21	sp|P93822|ERF97_ARATH Ethylene-responsive transcription factor 14 OS=Arabidopsis thaliana OX=3702 GN=ERF14 PE=2 SV=1
Unigene0000654	1277	879	697	sp|Q9LTC6|ERF95_ARATH	139	13	73	75.4	61	15	0	102.1	1.7e-20	sp|Q9LTC6|ERF95_ARATH Ethylene-responsive transcription factor ERF095 OS=Arabidopsis thaliana OX=3702 GN=ERF095 PE=1 SV=1
Unigene0000654	1277	879	697	sp|Q9LSX0|ERF96_ARATH	131	14	74	72.1	61	17	0	100.1	6.3e-20	sp|Q9LSX0|ERF96_ARATH Ethylene-responsive transcription factor ERF096 OS=Arabidopsis thaliana OX=3702 GN=ERF096 PE=1 SV=1
Unigene0000662	645	416	574	sp|P28552|ATPG_PEA	376	127	182	62.5	56	18	3	72.8	5.5e-12	sp|P28552|ATPG_PEA ATP synthase gamma chain, chloroplastic OS=Pisum sativum OX=3888 GN=ATPC PE=2 SV=1
Unigene0000662	645	416	574	sp|Q01908|ATPG1_ARATH	373	126	181	64.3	56	17	3	71.6	1.2e-11	sp|Q01908|ATPG1_ARATH ATP synthase gamma chain 1, chloroplastic OS=Arabidopsis thaliana OX=3702 GN=ATPC1 PE=1 SV=1
Unigene0000662	645	416	574	sp|P05435|ATPG_SPIOL	364	117	172	62.5	56	18	3	70.9	2.1e-11	sp|P05435|ATPG_SPIOL ATP synthase gamma chain, chloroplastic OS=Spinacia oleracea OX=3562 GN=ATPC PE=1 SV=2
Unigene0000662	645	416	574	sp|P29790|ATPG_TOBAC	377	130	185	62.5	56	18	3	70.9	2.1e-11	sp|P29790|ATPG_TOBAC ATP synthase gamma chain, chloroplastic OS=Nicotiana tabacum OX=4097 GN=ATPC PE=1 SV=1
Unigene0000662	645	416	574	sp|P0C1M0|ATPG_MAIZE	359	111	166	55.4	56	22	3	65.1	1.1e-09	sp|P0C1M0|ATPG_MAIZE ATP synthase subunit gamma, chloroplastic OS=Zea mays OX=4577 PE=1 SV=1
Unigene0000662	645	416	568	sp|Q01909|ATPG2_ARATH	386	136	189	51.9	54	23	3	60.1	3.7e-08	sp|Q01909|ATPG2_ARATH ATP synthase gamma chain 2, chloroplastic OS=Arabidopsis thaliana OX=3702 GN=ATPC2 PE=2 SV=1
Unigene0000662	645	413	568	sp|Q06908|ATPG_TRICV	370	131	185	49.1	55	25	3	54.3	2.0e-06	sp|Q06908|ATPG_TRICV ATP synthase gamma chain, chloroplastic OS=Trieres chinensis OX=1514140 GN=ATPC PE=1 SV=1
Unigene0000662	645	428	568	sp|B2J059|ATPG_NOSP7	315	81	130	46	50	24	3	53.1	4.5e-06	sp|B2J059|ATPG_NOSP7 ATP synthase gamma chain OS=Nostoc punctiforme (strain ATCC 29133 / PCC 73102) OX=63737 GN=atpG PE=3 SV=1
Unigene0000662	645	416	568	sp|Q41075|ATPG_PHATR	370	132	185	46.3	54	26	3	53.1	4.5e-06	sp|Q41075|ATPG_PHATR ATP synthase gamma chain, chloroplastic OS=Phaeodactylum tricornutum OX=2850 GN=ATPC PE=2 SV=1
Unigene0000662	645	428	577	sp|B7KKR3|ATPG_GLOC7	314	81	133	49.1	53	24	3	52	1.0e-05	sp|B7KKR3|ATPG_GLOC7 ATP synthase gamma chain OS=Gloeothece citriformis (strain PCC 7424) OX=65393 GN=atpG PE=3 SV=1
Unigene0000663	2496	2280	268	sp|Q05046|CH62_CUCMA	575	210	575	34.8	686	112	335	285.4	2.1e-75	sp|Q05046|CH62_CUCMA Chaperonin CPN60-2, mitochondrial OS=Cucurbita maxima OX=3661 GN=CPN60-2 PE=1 SV=1
Unigene0000663	2496	2280	268	sp|Q05045|CH61_CUCMA	575	210	575	34.3	686	116	335	275.8	1.6e-72	sp|Q05045|CH61_CUCMA Chaperonin CPN60-1, mitochondrial OS=Cucurbita maxima OX=3661 GN=CPN60-1 PE=1 SV=1
Unigene0000663	2496	2280	268	sp|P29185|CH61_MAIZE	577	212	577	34.3	686	116	335	268.5	2.6e-70	sp|P29185|CH61_MAIZE Chaperonin CPN60-1, mitochondrial OS=Zea mays OX=4577 GN=CPN60I PE=1 SV=2
Unigene0000663	2496	2283	313	sp|P29197|CH60A_ARATH	577	208	559	34.4	672	106	335	261.9	2.5e-68	sp|P29197|CH60A_ARATH Chaperonin CPN60, mitochondrial OS=Arabidopsis thaliana OX=3702 GN=CPN60 PE=1 SV=2
Unigene0000663	2496	2280	268	sp|Q43298|CH62_MAIZE	576	212	576	33.4	686	121	336	255.8	1.8e-66	sp|Q43298|CH62_MAIZE Chaperonin CPN60-2, mitochondrial OS=Zea mays OX=4577 GN=CPN60II PE=2 SV=1
Unigene0000663	2496	2283	277	sp|Q8L7B5|CH60B_ARATH	585	209	568	32.6	684	122	339	252.7	1.5e-65	sp|Q8L7B5|CH60B_ARATH Chaperonin CPN60-like 1, mitochondrial OS=Arabidopsis thaliana OX=3702 GN=At2g33210 PE=1 SV=1
Unigene0000663	2496	2283	286	sp|P35480|CH60_BRANA	587	211	572	31.7	682	130	336	236.1	1.4e-60	sp|P35480|CH60_BRANA Chaperonin CPN60, mitochondrial OS=Brassica napus OX=3708 PE=2 SV=1
Unigene0000663	2496	2280	274	sp|Q93ZM7|CH60C_ARATH	572	209	570	28.5	681	156	331	189.1	2.0e-46	sp|Q93ZM7|CH60C_ARATH Chaperonin CPN60-like 2, mitochondrial OS=Arabidopsis thaliana OX=3702 GN=At3g13860 PE=1 SV=2
Unigene0000663	2496	915	268	sp|Q11LG4|CH601_CHESB	544	319	544	46.9	226	110	10	177.6	6.1e-43	sp|Q11LG4|CH601_CHESB Chaperonin GroEL 1 OS=Chelativorans sp. (strain BNC1) OX=266779 GN=groEL1 PE=3 SV=1
Unigene0000663	2496	2283	1996	sp|Q11LG4|CH601_CHESB	544	178	273	58.3	96	40	0	112.8	1.8e-23	sp|Q11LG4|CH601_CHESB Chaperonin GroEL 1 OS=Chelativorans sp. (strain BNC1) OX=266779 GN=groEL1 PE=3 SV=1
Unigene0000663	2496	903	307	sp|P50142|HSP60_AJECA	590	360	571	50.2	213	91	15	177.2	7.9e-43	sp|P50142|HSP60_AJECA Heat shock protein 60, mitochondrial OS=Ajellomyces capsulatus OX=5037 GN=HSP60 PE=3 SV=2
Unigene0000663	2496	906	283	sp|Q54J97|CH60_DICDI	556	338	554	47.5	223	96	21	175.3	3.0e-42	sp|Q54J97|CH60_DICDI 60 kDa heat shock protein, mitochondrial OS=Dictyostelium discoideum OX=44689 GN=hspA PE=2 SV=1
Unigene0000663	2496	2283	1996	sp|Q54J97|CH60_DICDI	556	195	289	50	96	47	1	103.2	1.5e-20	sp|Q54J97|CH60_DICDI 60 kDa heat shock protein, mitochondrial OS=Dictyostelium discoideum OX=44689 GN=hspA PE=2 SV=1
Unigene0000663	2496	915	268	sp|P30779|CH60_AGRFC	544	319	544	45.1	226	114	10	174.5	5.2e-42	sp|P30779|CH60_AGRFC Chaperonin GroEL OS=Agrobacterium fabrum (strain C58 / ATCC 33970) OX=176299 GN=groEL PE=3 SV=2
Unigene0000663	2496	2283	1996	sp|P30779|CH60_AGRFC	544	178	273	56.2	96	42	0	111.7	4.1e-23	sp|P30779|CH60_AGRFC Chaperonin GroEL OS=Agrobacterium fabrum (strain C58 / ATCC 33970) OX=176299 GN=groEL PE=3 SV=2
Unigene0000663	2496	915	268	sp|B1LVA0|CH60_METRJ	546	319	546	45.6	228	112	12	174.1	6.7e-42	sp|B1LVA0|CH60_METRJ Chaperonin GroEL OS=Methylobacterium radiotolerans (strain ATCC 27329 / DSM 1819 / JCM 2831 / NBRC 15690 / NCIMB 10815 / 0-1) OX=426355 GN=groEL PE=3 SV=1
Unigene0000663	2496	2283	1996	sp|B1LVA0|CH60_METRJ	546	178	273	61.5	96	37	0	118.2	4.4e-25	sp|B1LVA0|CH60_METRJ Chaperonin GroEL OS=Methylobacterium radiotolerans (strain ATCC 27329 / DSM 1819 / JCM 2831 / NBRC 15690 / NCIMB 10815 / 0-1) OX=426355 GN=groEL PE=3 SV=1
Unigene0000663	2496	915	268	sp|A5EM76|CH604_BRASB	546	319	546	44.2	233	108	22	172.9	1.5e-41	sp|A5EM76|CH604_BRASB Chaperonin GroEL 4 OS=Bradyrhizobium sp. (strain BTAi1 / ATCC BAA-1182) OX=288000 GN=groEL4 PE=3 SV=1
Unigene0000663	2496	2283	1996	sp|A5EM76|CH604_BRASB	546	178	273	58.3	96	40	0	114	8.3e-24	sp|A5EM76|CH604_BRASB Chaperonin GroEL 4 OS=Bradyrhizobium sp. (strain BTAi1 / ATCC BAA-1182) OX=288000 GN=groEL4 PE=3 SV=1
Unigene0000663	2496	915	268	sp|A8I5R5|CH602_AZOC5	542	319	542	45.6	226	111	12	172.2	2.6e-41	sp|A8I5R5|CH602_AZOC5 Chaperonin GroEL 2 OS=Azorhizobium caulinodans (strain ATCC 43989 / DSM 5975 / JCM 20966 / LMG 6465 / NBRC 14845 / NCIMB 13405 / ORS 571) OX=438753 GN=groEL2 PE=3 SV=1
Unigene0000663	2496	2283	1996	sp|A8I5R5|CH602_AZOC5	542	178	273	59.4	96	39	0	115.2	3.7e-24	sp|A8I5R5|CH602_AZOC5 Chaperonin GroEL 2 OS=Azorhizobium caulinodans (strain ATCC 43989 / DSM 5975 / JCM 20966 / LMG 6465 / NBRC 14845 / NCIMB 13405 / ORS 571) OX=438753 GN=groEL2 PE=3 SV=1
Unigene0000663	2496	912	286	sp|Q2WAW8|CH60_PARM1	552	320	536	47.5	221	100	16	171.8	3.3e-41	sp|Q2WAW8|CH60_PARM1 Chaperonin GroEL OS=Paramagnetospirillum magneticum (strain ATCC 700264 / AMB-1) OX=342108 GN=groEL PE=3 SV=1
Unigene0000663	2496	2283	1996	sp|Q2WAW8|CH60_PARM1	552	178	273	53.1	96	45	0	105.9	2.3e-21	sp|Q2WAW8|CH60_PARM1 Chaperonin GroEL OS=Paramagnetospirillum magneticum (strain ATCC 700264 / AMB-1) OX=342108 GN=groEL PE=3 SV=1
Unigene0000663	2496	903	274	sp|O60008|HSP60_PARBA	592	360	580	47.3	224	101	17	171.8	3.3e-41	sp|O60008|HSP60_PARBA Heat shock protein 60, mitochondrial OS=Paracoccidioides lutzii (strain ATCC MYA-826 / Pb01) OX=502779 GN=HSP60 PE=1 SV=1
Unigene0000663	2496	915	268	sp|B1ZAU5|CH60_METPB	546	319	546	44.7	228	114	12	171.4	4.4e-41	sp|B1ZAU5|CH60_METPB Chaperonin GroEL OS=Methylorubrum populi (strain ATCC BAA-705 / NCIMB 13946 / BJ001) OX=441620 GN=groEL PE=3 SV=1
Unigene0000663	2496	2283	1996	sp|B1ZAU5|CH60_METPB	546	178	273	59.4	96	39	0	115.9	2.2e-24	sp|B1ZAU5|CH60_METPB Chaperonin GroEL OS=Methylorubrum populi (strain ATCC BAA-705 / NCIMB 13946 / BJ001) OX=441620 GN=groEL PE=3 SV=1
Unigene0000663	2496	906	274	sp|P63038|CH60_MOUSE	573	347	561	48.2	220	100	14	171	5.7e-41	sp|P63038|CH60_MOUSE 60 kDa heat shock protein, mitochondrial OS=Mus musculus OX=10090 GN=Hspd1 PE=1 SV=1
Unigene0000663	2496	2283	1996	sp|P63038|CH60_MOUSE	573	202	297	56.2	96	42	0	119	2.6e-25	sp|P63038|CH60_MOUSE 60 kDa heat shock protein, mitochondrial OS=Mus musculus OX=10090 GN=Hspd1 PE=1 SV=1
Unigene0000663	2496	906	274	sp|P63039|CH60_RAT	573	347	561	48.2	220	100	14	171	5.7e-41	sp|P63039|CH60_RAT 60 kDa heat shock protein, mitochondrial OS=Rattus norvegicus OX=10116 GN=Hspd1 PE=1 SV=1
Unigene0000663	2496	2283	1996	sp|P63039|CH60_RAT	573	202	297	56.2	96	42	0	119	2.6e-25	sp|P63039|CH60_RAT 60 kDa heat shock protein, mitochondrial OS=Rattus norvegicus OX=10116 GN=Hspd1 PE=1 SV=1
Unigene0000669	409	17	256	sp|Q9M2E2|SDR1_ARATH	296	7	94	53.4	88	33	8	81.6	7.4e-15	sp|Q9M2E2|SDR1_ARATH (+)-neomenthol dehydrogenase OS=Arabidopsis thaliana OX=3702 GN=SDR1 PE=1 SV=1
Unigene0000673	757	742	239	sp|P93835|DRE1B_ARATH	213	20	212	44.7	199	73	37	154.8	1.3e-36	sp|P93835|DRE1B_ARATH Dehydration-responsive element-binding protein 1B OS=Arabidopsis thaliana OX=3702 GN=DREB1B PE=1 SV=2
Unigene0000673	757	697	242	sp|A2WZI4|DRE1F_ORYSI	219	34	217	46.7	184	66	32	151	1.8e-35	sp|A2WZI4|DRE1F_ORYSI Dehydration-responsive element-binding protein 1F OS=Oryza sativa subsp. indica OX=39946 GN=DREB1F PE=2 SV=1
Unigene0000673	757	697	242	sp|Q8S9Z5|DRE1F_ORYSJ	219	34	217	46.7	184	66	32	151	1.8e-35	sp|Q8S9Z5|DRE1F_ORYSJ Dehydration-responsive element-binding protein 1F OS=Oryza sativa subsp. japonica OX=39947 GN=DREB1F PE=3 SV=1
Unigene0000673	757	742	239	sp|Q9SYS6|DRE1C_ARATH	216	23	215	43.7	199	75	37	147.5	2.0e-34	sp|Q9SYS6|DRE1C_ARATH Dehydration-responsive element-binding protein 1C OS=Arabidopsis thaliana OX=3702 GN=DREB1C PE=1 SV=2
Unigene0000673	757	724	233	sp|Q9FJ93|DRE1D_ARATH	224	32	223	42.5	200	71	44	144.4	1.7e-33	sp|Q9FJ93|DRE1D_ARATH Dehydration-responsive element-binding protein 1D OS=Arabidopsis thaliana OX=3702 GN=DREB1D PE=2 SV=1
Unigene0000673	757	742	239	sp|Q9M0L0|DRE1A_ARATH	216	23	215	41.9	198	80	35	141.7	1.1e-32	sp|Q9M0L0|DRE1A_ARATH Dehydration-responsive element-binding protein 1A OS=Arabidopsis thaliana OX=3702 GN=DREB1A PE=1 SV=2
Unigene0000673	757	745	407	sp|Q9LN86|DRE1F_ARATH	209	1	114	53.5	114	52	1	129	7.5e-29	sp|Q9LN86|DRE1F_ARATH Dehydration-responsive element-binding protein 1F OS=Arabidopsis thaliana OX=3702 GN=DREB1F PE=2 SV=1
Unigene0000673	757	706	407	sp|Q9SGJ6|DRE1E_ARATH	181	14	114	59.4	101	40	1	127.9	1.7e-28	sp|Q9SGJ6|DRE1E_ARATH Dehydration-responsive element-binding protein 1E OS=Arabidopsis thaliana OX=3702 GN=DREB1E PE=2 SV=1
Unigene0000673	757	742	407	sp|A2XWL6|DRE1E_ORYSI	219	23	138	52.6	116	51	4	110.2	3.6e-23	sp|A2XWL6|DRE1E_ORYSI Dehydration-responsive element-binding protein 1E OS=Oryza sativa subsp. indica OX=39946 GN=DREB1E PE=3 SV=1
Unigene0000673	757	742	407	sp|Q8H273|DRE1E_ORYSJ	219	23	138	52.6	116	51	4	110.2	3.6e-23	sp|Q8H273|DRE1E_ORYSJ Dehydration-responsive element-binding protein 1E OS=Oryza sativa subsp. japonica OX=39947 GN=DREB1E PE=2 SV=1
Unigene0000673	757	724	407	sp|A2X899|DRE1G_ORYSI	224	33	140	52.8	108	49	2	107.8	1.8e-22	sp|A2X899|DRE1G_ORYSI Dehydration-responsive element-binding protein 1G OS=Oryza sativa subsp. indica OX=39946 GN=DREB1G PE=3 SV=1
Unigene0000673	757	724	407	sp|Q6EP77|DRE1G_ORYSJ	224	33	140	52.8	108	49	2	107.8	1.8e-22	sp|Q6EP77|DRE1G_ORYSJ Dehydration-responsive element-binding protein 1G OS=Oryza sativa subsp. japonica OX=39947 GN=DREB1G PE=2 SV=1
Unigene0000673	757	739	413	sp|A2Y8S6|DRE1C_ORYSI	214	7	119	53.1	113	49	4	106.3	5.2e-22	sp|A2Y8S6|DRE1C_ORYSI Dehydration-responsive element-binding protein 1C OS=Oryza sativa subsp. indica OX=39946 GN=DREB1C PE=3 SV=1
Unigene0000673	757	739	413	sp|Q9LWV3|DRE1C_ORYSJ	214	7	119	53.1	113	49	4	106.3	5.2e-22	sp|Q9LWV3|DRE1C_ORYSJ Dehydration-responsive element-binding protein 1C OS=Oryza sativa subsp. japonica OX=39947 GN=DREB1C PE=2 SV=1
Unigene0000673	757	706	296	sp|Q3T5N4|DRE1B_ORYSJ	218	17	164	41.2	148	76	11	102.1	9.8e-21	sp|Q3T5N4|DRE1B_ORYSJ Dehydration-responsive element-binding protein 1B OS=Oryza sativa subsp. japonica OX=39947 GN=DREB1B PE=2 SV=1
Unigene0000673	757	706	296	sp|Q8GUW4|DRE1B_ORYSI	218	17	164	41.2	148	76	11	101.7	1.3e-20	sp|Q8GUW4|DRE1B_ORYSI Dehydration-responsive element-binding protein 1B OS=Oryza sativa subsp. indica OX=39946 GN=DREB1B PE=2 SV=1
Unigene0000673	757	706	203	sp|A2Z388|DRE1H_ORYSI	246	31	213	38.8	188	90	25	99.4	6.4e-20	sp|A2Z388|DRE1H_ORYSI Dehydration-responsive element-binding protein 1H OS=Oryza sativa subsp. indica OX=39946 GN=DREB1H PE=2 SV=1
Unigene0000673	757	706	203	sp|Q0J090|DRE1H_ORYSJ	246	31	213	38.8	188	90	25	99.4	6.4e-20	sp|Q0J090|DRE1H_ORYSJ Dehydration-responsive element-binding protein 1H OS=Oryza sativa subsp. japonica OX=39947 GN=DREB1H PE=3 SV=1
Unigene0000673	757	694	278	sp|Q9SJR0|ERF24_ARATH	184	3	177	37.7	175	73	36	97.4	2.4e-19	sp|Q9SJR0|ERF24_ARATH Ethylene-responsive transcription factor ERF024 OS=Arabidopsis thaliana OX=3702 GN=ERF024 PE=2 SV=1
Unigene0000673	757	670	410	sp|Q39127|TINY_ARATH	218	32	119	51.1	88	42	1	93.6	3.5e-18	sp|Q39127|TINY_ARATH Ethylene-responsive transcription factor TINY OS=Arabidopsis thaliana OX=3702 GN=TINY PE=2 SV=1
Unigene0000674	651	38	448	sp|P0CT56|RS14A_SCHPO	139	3	139	86.9	137	18	0	244.6	1.1e-63	sp|P0CT56|RS14A_SCHPO Small ribosomal subunit protein uS11A OS=Schizosaccharomyces pombe (strain 972 / ATCC 24843) OX=284812 GN=rps1401 PE=3 SV=1
Unigene0000674	651	38	448	sp|P0CT57|RS14B_SCHPO	139	3	139	86.9	137	18	0	244.6	1.1e-63	sp|P0CT57|RS14B_SCHPO Small ribosomal subunit protein uS11B OS=Schizosaccharomyces pombe (strain 972 / ATCC 24843) OX=284812 GN=rps1402 PE=3 SV=1
Unigene0000674	651	8	448	sp|Q08699|RS14_PODCA	151	3	151	84.6	149	21	2	244.6	1.1e-63	sp|Q08699|RS14_PODCA Small ribosomal subunit protein uS11 OS=Podocoryna carnea OX=6096 GN=RPS14 PE=2 SV=1
Unigene0000674	651	41	448	sp|P62265|RS14_CRIGR	151	16	151	90.4	136	13	0	243.4	2.4e-63	sp|P62265|RS14_CRIGR Small ribosomal subunit protein uS11 OS=Cricetulus griseus OX=10029 GN=RPS14 PE=2 SV=3
Unigene0000674	651	41	448	sp|P62263|RS14_HUMAN	151	16	151	90.4	136	13	0	243.4	2.4e-63	sp|P62263|RS14_HUMAN Small ribosomal subunit protein uS11 OS=Homo sapiens OX=9606 GN=RPS14 PE=1 SV=3
Unigene0000674	651	41	448	sp|P62264|RS14_MOUSE	151	16	151	90.4	136	13	0	243.4	2.4e-63	sp|P62264|RS14_MOUSE Small ribosomal subunit protein uS11 OS=Mus musculus OX=10090 GN=Rps14 PE=1 SV=3
Unigene0000674	651	41	448	sp|G1T1F0|RS14_RABIT	151	16	151	90.4	136	13	0	243.4	2.4e-63	sp|G1T1F0|RS14_RABIT Small ribosomal subunit protein uS11 OS=Oryctolagus cuniculus OX=9986 GN=RPS14 PE=1 SV=2
Unigene0000674	651	41	448	sp|P13471|RS14_RAT	151	16	151	90.4	136	13	0	243.4	2.4e-63	sp|P13471|RS14_RAT Small ribosomal subunit protein uS11 OS=Rattus norvegicus OX=10116 GN=Rps14 PE=1 SV=3
Unigene0000674	651	14	448	sp|P48150|RS14_CAEEL	152	8	152	83.4	145	24	0	242.7	4.0e-63	sp|P48150|RS14_CAEEL Small ribosomal subunit protein uS11 OS=Caenorhabditis elegans OX=6239 GN=rps-14 PE=3 SV=1
Unigene0000674	651	5	448	sp|P19115|RS14_NEUCR	150	1	150	82.7	150	24	2	242.7	4.0e-63	sp|P19115|RS14_NEUCR Small ribosomal subunit protein uS11 OS=Neurospora crassa (strain ATCC 24698 / 74-OR23-1A / CBS 708.71 / DSM 1257 / FGSC 987) OX=367110 GN=rps-14 PE=3 SV=2
Unigene0000674	651	14	448	sp|P19950|RS141_MAIZE	149	5	149	83.4	145	24	0	241.5	9.0e-63	sp|P19950|RS141_MAIZE Small ribosomal subunit protein uS11z OS=Zea mays OX=4577 PE=3 SV=1
Unigene0000674	651	5	448	sp|P46295|RS14_CHLRE	153	1	153	82.4	153	22	5	240.7	1.5e-62	sp|P46295|RS14_CHLRE Small ribosomal subunit protein uS11 OS=Chlamydomonas reinhardtii OX=3055 GN=RPS14 PE=3 SV=1
Unigene0000674	651	14	448	sp|Q7QBX2|RS14B_ANOGA	152	8	152	82.8	145	25	0	240	2.6e-62	sp|Q7QBX2|RS14B_ANOGA Small ribosomal subunit protein uS11B OS=Anopheles gambiae OX=7165 GN=RpS14b PE=3 SV=2
Unigene0000674	651	35	448	sp|Q1HR24|RS14_AEDAE	151	14	151	86.2	138	19	0	240	2.6e-62	sp|Q1HR24|RS14_AEDAE Small ribosomal subunit protein uS11 OS=Aedes aegypti OX=7159 GN=RpS14 PE=2 SV=1
Unigene0000674	651	14	448	sp|P19951|RS142_MAIZE	150	6	150	82.8	145	25	0	239.2	4.4e-62	sp|P19951|RS142_MAIZE Small ribosomal subunit protein uS11y OS=Zea mays OX=4577 PE=3 SV=1
Unigene0000674	651	14	448	sp|Q7QEH1|RS14A_ANOGA	152	8	152	82.8	145	25	0	239.2	4.4e-62	sp|Q7QEH1|RS14A_ANOGA Small ribosomal subunit protein uS11A OS=Anopheles gambiae OX=7165 GN=RpS14a PE=3 SV=2
Unigene0000674	651	14	448	sp|C0HKA0|RS14A_DROME	151	7	151	81.4	145	27	0	237.7	1.3e-61	sp|C0HKA0|RS14A_DROME Small ribosomal subunit protein uS11A OS=Drosophila melanogaster OX=7227 GN=RpS14a PE=1 SV=1
Unigene0000674	651	14	448	sp|Q6XI08|RS14A_DROYA	151	7	151	81.4	145	27	0	237.7	1.3e-61	sp|Q6XI08|RS14A_DROYA Small ribosomal subunit protein uS11 OS=Drosophila yakuba OX=7245 GN=RpS14a PE=2 SV=1
Unigene0000674	651	14	448	sp|C0HKA1|RS14B_DROME	151	7	151	81.4	145	27	0	237.7	1.3e-61	sp|C0HKA1|RS14B_DROME Small ribosomal subunit protein uS11B OS=Drosophila melanogaster OX=7227 GN=RpS14b PE=2 SV=1
Unigene0000674	651	14	448	sp|Q9CAX6|RS142_ARATH	150	5	150	80.1	146	28	1	235.7	4.9e-61	sp|Q9CAX6|RS142_ARATH Small ribosomal subunit protein uS11y OS=Arabidopsis thaliana OX=3702 GN=RPS14B PE=1 SV=1
Unigene0000676	2145	2075	417	sp|Q9C5D6|CAAT9_ARATH	569	2	558	65.8	559	183	8	701.4	1.0e-200	sp|Q9C5D6|CAAT9_ARATH Cationic amino acid transporter 9, chloroplastic OS=Arabidopsis thaliana OX=3702 GN=CAT9 PE=2 SV=1
Unigene0000676	2145	1952	798	sp|Q797A7|MTRTR_BACSU	461	20	399	43.8	386	210	7	303.9	4.8e-81	sp|Q797A7|MTRTR_BACSU Methylthioribose transporter OS=Bacillus subtilis (strain 168) OX=224308 GN=mtrA PE=3 SV=1
Unigene0000676	2145	1958	435	sp|Q8W4K3|CAAT4_ARATH	600	20	578	33.2	567	312	67	302.4	1.4e-80	sp|Q8W4K3|CAAT4_ARATH Cationic amino acid transporter 4, vacuolar OS=Arabidopsis thaliana OX=3702 GN=CAT4 PE=1 SV=1
Unigene0000676	2145	1958	435	sp|O07576|BCAP_BACSU	465	20	461	34.4	509	266	68	285	2.3e-75	sp|O07576|BCAP_BACSU Branched-chain amino acid permease BcaP OS=Bacillus subtilis (strain 168) OX=224308 GN=bcaP PE=1 SV=1
Unigene0000676	2145	1946	432	sp|Q8GYB4|CAAT3_ARATH	609	29	585	32.2	568	311	74	277.7	3.7e-73	sp|Q8GYB4|CAAT3_ARATH Cationic amino acid transporter 3, mitochondrial OS=Arabidopsis thaliana OX=3702 GN=CAT3 PE=2 SV=1
Unigene0000676	2145	1964	435	sp|O08812|CTR3_RAT	619	22	589	32	584	307	90	257.3	5.2e-67	sp|O08812|CTR3_RAT Cationic amino acid transporter 3 OS=Rattus norvegicus OX=10116 GN=Slc7a3 PE=1 SV=1
Unigene0000676	2145	2030	801	sp|Q9ASS7|CAAT2_ARATH	635	18	421	37.2	417	242	20	255.4	2.0e-66	sp|Q9ASS7|CAAT2_ARATH Cationic amino acid transporter 2, vacuolar OS=Arabidopsis thaliana OX=3702 GN=CAT2 PE=1 SV=1
Unigene0000676	2145	1964	435	sp|Q6DCE8|CTR2_XENLA	622	24	583	32.2	572	314	74	254.6	3.4e-66	sp|Q6DCE8|CTR2_XENLA Cationic amino acid transporter 2 OS=Xenopus laevis OX=8355 GN=slc7a2 PE=2 SV=1
Unigene0000676	2145	1964	435	sp|P70423|CTR3_MOUSE	618	22	588	31.3	575	322	73	248.8	1.8e-64	sp|P70423|CTR3_MOUSE Cationic amino acid transporter 3 OS=Mus musculus OX=10090 GN=Slc7a3 PE=1 SV=1
Unigene0000676	2145	2033	798	sp|B0UYF2|S7A14_DANRE	785	21	432	36.1	418	255	12	248.1	3.2e-64	sp|B0UYF2|S7A14_DANRE Probable cationic amino acid transporter OS=Danio rerio OX=7955 GN=slc7a14a PE=3 SV=1
Unigene0000676	2145	2015	435	sp|Q8WY07|CTR3_HUMAN	619	14	589	31.1	592	327	81	246.1	1.2e-63	sp|Q8WY07|CTR3_HUMAN Cationic amino acid transporter 3 OS=Homo sapiens OX=9606 GN=SLC7A3 PE=1 SV=1
Unigene0000676	2145	1955	777	sp|Q09143|CTR1_MOUSE	622	25	433	36.1	415	237	28	244.6	3.5e-63	sp|Q09143|CTR1_MOUSE High affinity cationic amino acid transporter 1 OS=Mus musculus OX=10090 GN=Slc7a1 PE=1 SV=1
Unigene0000676	2145	1955	777	sp|P30823|CTR1_RAT	624	25	435	36.2	417	236	30	242.7	1.3e-62	sp|P30823|CTR1_RAT High affinity cationic amino acid transporter 1 OS=Rattus norvegicus OX=10116 GN=Slc7a1 PE=2 SV=1
Unigene0000676	2145	1955	435	sp|O43246|CTR4_HUMAN	635	30	590	29.9	572	325	76	241.1	3.9e-62	sp|O43246|CTR4_HUMAN Cationic amino acid transporter 4 OS=Homo sapiens OX=9606 GN=SLC7A4 PE=1 SV=3
Unigene0000676	2145	1952	381	sp|Q9SQZ0|CAAT7_ARATH	584	54	577	30.6	545	336	42	240.4	6.6e-62	sp|Q9SQZ0|CAAT7_ARATH Cationic amino acid transporter 7, chloroplastic OS=Arabidopsis thaliana OX=3702 GN=CAT7 PE=3 SV=1
Unigene0000676	2145	2033	798	sp|B3TP03|CTR2_CHICK	654	9	434	33.9	445	242	52	239.6	1.1e-61	sp|B3TP03|CTR2_CHICK Cationic amino acid transporter 2 OS=Gallus gallus OX=9031 GN=SLC7A2 PE=2 SV=1
Unigene0000676	2145	2051	435	sp|Q8BLQ7|CTR4_MOUSE	635	7	590	30	604	338	85	236.5	9.5e-61	sp|Q8BLQ7|CTR4_MOUSE Cationic amino acid transporter 4 OS=Mus musculus OX=10090 GN=Slc7a4 PE=1 SV=1
Unigene0000676	2145	2045	789	sp|Q8BXR1|S7A14_MOUSE	771	17	435	33.7	433	259	28	235	2.8e-60	sp|Q8BXR1|S7A14_MOUSE Solute carrier family 7 member 14 OS=Mus musculus OX=10090 GN=Slc7a14 PE=1 SV=1
Unigene0000676	2145	1952	405	sp|Q9LZ20|CAAT6_ARATH	583	55	570	29.8	541	330	50	234.2	4.7e-60	sp|Q9LZ20|CAAT6_ARATH Cationic amino acid transporter 6, chloroplastic OS=Arabidopsis thaliana OX=3702 GN=CAT6 PE=2 SV=1
Unigene0000676	2145	1922	447	sp|Q84MA5|CAAT1_ARATH	594	78	559	31.9	496	320	18	233.8	6.2e-60	sp|Q84MA5|CAAT1_ARATH Cationic amino acid transporter 1 OS=Arabidopsis thaliana OX=3702 GN=CAT1 PE=1 SV=1
Unigene0000679	751	751	137	sp|Q59T44|RS8A_CANAL	206	1	205	62.9	205	76	0	258.1	1.1e-67	sp|Q59T44|RS8A_CANAL Small ribosomal subunit protein eS8 OS=Candida albicans (strain SC5314 / ATCC MYA-2876) OX=237561 GN=RPS8A PE=1 SV=1
Unigene0000679	751	751	137	sp|P0CX39|RS8A_YEAST	200	1	199	64.9	205	66	6	257.7	1.4e-67	sp|P0CX39|RS8A_YEAST Small ribosomal subunit protein eS8A OS=Saccharomyces cerevisiae (strain ATCC 204508 / S288c) OX=559292 GN=RPS8A PE=1 SV=1
Unigene0000679	751	751	137	sp|P0CX40|RS8B_YEAST	200	1	199	64.9	205	66	6	257.7	1.4e-67	sp|P0CX40|RS8B_YEAST Small ribosomal subunit protein eS8B OS=Saccharomyces cerevisiae (strain ATCC 204508 / S288c) OX=559292 GN=RPS8B PE=1 SV=1
Unigene0000679	751	751	131	sp|O76756|RS8_APIME	208	1	207	63.3	207	76	0	250.4	2.2e-65	sp|O76756|RS8_APIME Small ribosomal subunit protein eS8 OS=Apis mellifera OX=7460 GN=RpS8 PE=2 SV=2
Unigene0000679	751	751	137	sp|Q90YR6|RS8_ICTPU	208	1	205	60.5	205	81	0	248.4	8.4e-65	sp|Q90YR6|RS8_ICTPU Small ribosomal subunit protein eS8 OS=Ictalurus punctatus OX=7998 GN=rps8 PE=2 SV=3
Unigene0000679	751	751	137	sp|Q7SYU0|RS8_XENLA	208	1	205	61	205	80	0	246.9	2.5e-64	sp|Q7SYU0|RS8_XENLA Small ribosomal subunit protein eS8 OS=Xenopus laevis OX=8355 GN=rps8 PE=2 SV=3
Unigene0000679	751	751	137	sp|Q5E958|RS8_BOVIN	208	1	205	60	205	82	0	246.1	4.2e-64	sp|Q5E958|RS8_BOVIN Small ribosomal subunit protein eS8 OS=Bos taurus OX=9913 GN=RPS8 PE=1 SV=3
Unigene0000679	751	751	137	sp|P62241|RS8_HUMAN	208	1	205	60	205	82	0	246.1	4.2e-64	sp|P62241|RS8_HUMAN Small ribosomal subunit protein eS8 OS=Homo sapiens OX=9606 GN=RPS8 PE=1 SV=2
Unigene0000679	751	751	137	sp|Q4R6P8|RS8_MACFA	208	1	205	60	205	82	0	246.1	4.2e-64	sp|Q4R6P8|RS8_MACFA Small ribosomal subunit protein eS8 OS=Macaca fascicularis OX=9541 GN=RPS8 PE=2 SV=3
Unigene0000679	751	751	137	sp|P62242|RS8_MOUSE	208	1	205	60	205	82	0	246.1	4.2e-64	sp|P62242|RS8_MOUSE Small ribosomal subunit protein eS8 OS=Mus musculus OX=10090 GN=Rps8 PE=1 SV=2
Unigene0000679	751	751	137	sp|P62243|RS8_RAT	208	1	205	60	205	82	0	246.1	4.2e-64	sp|P62243|RS8_RAT Small ribosomal subunit protein eS8 OS=Rattus norvegicus OX=10116 GN=Rps8 PE=1 SV=2
Unigene0000679	751	751	137	sp|G1TJW1|RS8_RABIT	208	1	205	59.5	205	83	0	243.4	2.7e-63	sp|G1TJW1|RS8_RABIT Small ribosomal subunit protein eS8 OS=Oryctolagus cuniculus OX=9986 GN=RPS8 PE=1 SV=1
Unigene0000679	751	751	137	sp|Q9P7B2|RS8B_SCHPO	200	1	199	62	205	72	6	243	3.5e-63	sp|Q9P7B2|RS8B_SCHPO Small ribosomal subunit protein eS8B OS=Schizosaccharomyces pombe (strain 972 / ATCC 24843) OX=284812 GN=rps802 PE=1 SV=1
Unigene0000679	751	751	137	sp|O14049|RS8A_SCHPO	200	1	199	62	205	72	6	242.7	4.6e-63	sp|O14049|RS8A_SCHPO Small ribosomal subunit protein eS8A OS=Schizosaccharomyces pombe (strain 972 / ATCC 24843) OX=284812 GN=rps801 PE=3 SV=1
Unigene0000679	751	751	137	sp|P62247|RS8_DANRE	208	1	205	59	205	84	0	242.3	6.0e-63	sp|P62247|RS8_DANRE Small ribosomal subunit protein eS8 OS=Danio rerio OX=7955 GN=rps8 PE=1 SV=2
Unigene0000679	751	751	128	sp|P49199|RS8_ORYSJ	220	1	219	59.8	219	77	11	240.7	1.8e-62	sp|P49199|RS8_ORYSJ Small ribosomal subunit protein eS8 OS=Oryza sativa subsp. japonica OX=39947 GN=RPS8 PE=2 SV=2
Unigene0000679	751	751	119	sp|Q9FIF3|RS82_ARATH	210	1	208	59.9	212	80	5	240.4	2.3e-62	sp|Q9FIF3|RS82_ARATH Small ribosomal subunit protein eS8y OS=Arabidopsis thaliana OX=3702 GN=RPS8B PE=2 SV=1
Unigene0000679	751	751	128	sp|Q08069|RS8_MAIZE	221	1	218	59.6	218	78	10	240.4	2.3e-62	sp|Q08069|RS8_MAIZE Small ribosomal subunit protein eS8 OS=Zea mays OX=4577 GN=RPS8 PE=2 SV=2
Unigene0000679	751	751	131	sp|Q8WQI5|RS8_SPOFR	208	1	207	60.9	207	81	0	239.2	5.1e-62	sp|Q8WQI5|RS8_SPOFR Small ribosomal subunit protein eS8 OS=Spodoptera frugiperda OX=7108 GN=RpS8 PE=2 SV=1
Unigene0000679	751	751	137	sp|Q8MLY8|RS8_DROME	208	1	207	58.9	207	83	2	232.6	4.8e-60	sp|Q8MLY8|RS8_DROME Small ribosomal subunit protein eS8 OS=Drosophila melanogaster OX=7227 GN=RpS8 PE=1 SV=1
Unigene0000681	1173	1147	269	sp|Q10243|VPS26_SCHPO	298	4	296	62.8	293	109	0	404.4	1.4e-111	sp|Q10243|VPS26_SCHPO Vacuolar protein sorting-associated protein 26 OS=Schizosaccharomyces pombe (strain 972 / ATCC 24843) OX=284812 GN=vps26 PE=3 SV=1
Unigene0000681	1173	1159	278	sp|Q6DFB9|V26BB_XENLA	337	1	295	62.4	295	110	1	385.6	6.9e-106	sp|Q6DFB9|V26BB_XENLA Vacuolar protein sorting-associated protein 26B-B OS=Xenopus laevis OX=8355 GN=vps26b-b PE=2 SV=1
Unigene0000681	1173	1159	278	sp|Q5BKM4|VP26B_XENTR	337	1	295	61.7	295	112	1	384.4	1.5e-105	sp|Q5BKM4|VP26B_XENTR Vacuolar protein sorting-associated protein 26B OS=Xenopus tropicalis OX=8364 GN=vps26b PE=2 SV=1
Unigene0000681	1173	1159	278	sp|Q68F29|V26BA_XENLA	337	1	295	61.7	295	112	1	383.3	3.4e-105	sp|Q68F29|V26BA_XENLA Vacuolar protein sorting-associated protein 26B-A OS=Xenopus laevis OX=8355 GN=vps26b-a PE=2 SV=1
Unigene0000681	1173	1159	278	sp|Q4G0F5|VP26B_HUMAN	336	1	295	60.7	295	115	1	381.7	1.0e-104	sp|Q4G0F5|VP26B_HUMAN Vacuolar protein sorting-associated protein 26B OS=Homo sapiens OX=9606 GN=VPS26B PE=1 SV=2
Unigene0000681	1173	1159	278	sp|Q8C0E2|VP26B_MOUSE	336	1	295	60.7	295	115	1	381.7	1.0e-104	sp|Q8C0E2|VP26B_MOUSE Vacuolar protein sorting-associated protein 26B OS=Mus musculus OX=10090 GN=Vps26b PE=1 SV=1
Unigene0000681	1173	1159	278	sp|Q6DH23|V26BL_DANRE	329	1	295	60.7	295	115	1	379.4	5.0e-104	sp|Q6DH23|V26BL_DANRE Vacuolar protein sorting-associated protein 26B-like OS=Danio rerio OX=7955 GN=vps26bl PE=2 SV=1
Unigene0000681	1173	1159	278	sp|Q5R436|VP26B_PONAB	336	1	295	60.7	295	115	1	379	6.5e-104	sp|Q5R436|VP26B_PONAB Vacuolar protein sorting-associated protein 26B OS=Pongo abelii OX=9601 GN=VPS26B PE=2 SV=1
Unigene0000681	1173	1159	278	sp|Q7ZV03|VP26B_DANRE	331	1	295	60.3	295	116	1	375.6	7.2e-103	sp|Q7ZV03|VP26B_DANRE Vacuolar protein sorting-associated protein 26B OS=Danio rerio OX=7955 GN=vps26b PE=2 SV=1
Unigene0000681	1173	1144	278	sp|Q55CA0|VPS26_DICDI	349	8	298	59.1	291	117	2	373.6	2.7e-102	sp|Q55CA0|VPS26_DICDI Vacuolar protein sorting-associated protein 26 OS=Dictyostelium discoideum OX=44689 GN=vps26 PE=2 SV=1
Unigene0000681	1173	1144	269	sp|Q6TNP8|VP26A_DANRE	327	8	300	58.7	293	120	1	362.1	8.2e-99	sp|Q6TNP8|VP26A_DANRE Vacuolar protein sorting-associated protein 26A OS=Danio rerio OX=7955 GN=vps26a PE=1 SV=1
Unigene0000681	1173	1147	269	sp|Q0VD53|VP26A_BOVIN	327	7	300	58.5	294	121	1	357.1	2.6e-97	sp|Q0VD53|VP26A_BOVIN Vacuolar protein sorting-associated protein 26A OS=Bos taurus OX=9913 GN=VPS26A PE=2 SV=1
Unigene0000681	1173	1147	269	sp|O75436|VP26A_HUMAN	327	7	300	58.2	294	122	1	356.7	3.4e-97	sp|O75436|VP26A_HUMAN Vacuolar protein sorting-associated protein 26A OS=Homo sapiens OX=9606 GN=VPS26A PE=1 SV=2
Unigene0000681	1173	1147	269	sp|Q6AY86|VP26A_RAT	327	7	300	58.5	294	121	1	356.7	3.4e-97	sp|Q6AY86|VP26A_RAT Vacuolar protein sorting-associated protein 26A OS=Rattus norvegicus OX=10116 GN=Vps26a PE=1 SV=1
Unigene0000681	1173	1144	269	sp|Q6DFU4|V26AB_XENLA	326	8	300	58	293	122	1	356.3	4.5e-97	sp|Q6DFU4|V26AB_XENLA Vacuolar protein sorting-associated protein 26A-B OS=Xenopus laevis OX=8355 GN=vps26a-b PE=2 SV=1
Unigene0000681	1173	1147	269	sp|Q28HT6|VP26A_XENTR	326	7	300	58.2	294	122	1	356.3	4.5e-97	sp|Q28HT6|VP26A_XENTR Vacuolar protein sorting-associated protein 26A OS=Xenopus tropicalis OX=8364 GN=vps26a PE=2 SV=1
Unigene0000681	1173	1147	269	sp|P40336|VP26A_MOUSE	327	7	300	58.2	294	122	1	355.5	7.7e-97	sp|P40336|VP26A_MOUSE Vacuolar protein sorting-associated protein 26A OS=Mus musculus OX=10090 GN=Vps26a PE=1 SV=1
Unigene0000681	1173	1147	269	sp|Q6IRD0|V26AA_XENLA	326	7	300	57.8	294	123	1	354.4	1.7e-96	sp|Q6IRD0|V26AA_XENLA Vacuolar protein sorting-associated protein 26A-A OS=Xenopus laevis OX=8355 GN=vps26a-a PE=2 SV=1
Unigene0000681	1173	1159	275	sp|Q9W552|VPS26_DROME	478	1	295	56.1	296	128	2	354	2.2e-96	sp|Q9W552|VPS26_DROME Vacuolar protein sorting-associated protein 26 OS=Drosophila melanogaster OX=7227 GN=Vps26 PE=2 SV=1
Unigene0000681	1173	1159	266	sp|O01258|VPS26_CAEEL	356	1	300	56	300	130	2	346.7	3.6e-94	sp|O01258|VPS26_CAEEL Vacuolar protein sorting-associated protein 26 OS=Caenorhabditis elegans OX=6239 GN=vps-26 PE=3 SV=2
Unigene0000685	279	3	260	sp|Q9C5U1|AHK3_ARATH	1036	943	1028	72.1	86	24	0	137.9	6.0e-32	sp|Q9C5U1|AHK3_ARATH Histidine kinase 3 OS=Arabidopsis thaliana OX=3702 GN=AHK3 PE=1 SV=1
Unigene0000685	279	3	272	sp|A1A697|OHK5_ORYSJ	1187	1093	1182	62.2	90	34	0	127.5	8.1e-29	sp|A1A697|OHK5_ORYSJ Probable histidine kinase 5 OS=Oryza sativa subsp. japonica OX=39947 GN=HK5 PE=2 SV=1
Unigene0000685	279	3	263	sp|Q9C5U2|AHK2_ARATH	1176	1088	1174	63.2	87	32	0	124.4	6.8e-28	sp|Q9C5U2|AHK2_ARATH Histidine kinase 2 OS=Arabidopsis thaliana OX=3702 GN=AHK2 PE=1 SV=1
Unigene0000685	279	3	263	sp|A2WYI4|OHK3_ORYSI	1023	932	1017	66.7	87	28	1	120.9	7.6e-27	sp|A2WYI4|OHK3_ORYSI Probable histidine kinase 3 OS=Oryza sativa subsp. indica OX=39946 GN=HK3 PE=2 SV=1
Unigene0000685	279	3	263	sp|A1A696|OHK3_ORYSJ	1023	932	1017	66.7	87	28	1	120.9	7.6e-27	sp|A1A696|OHK3_ORYSJ Probable histidine kinase 3 OS=Oryza sativa subsp. japonica OX=39947 GN=HK3 PE=2 SV=1
Unigene0000685	279	3	257	sp|A1A698|OHK4_ORYSJ	1005	914	998	61.2	85	33	0	113.6	1.2e-24	sp|A1A698|OHK4_ORYSJ Probable histidine kinase 4 OS=Oryza sativa subsp. japonica OX=39947 GN=HK4 PE=2 SV=1
Unigene0000685	279	3	263	sp|Q9C5U0|AHK4_ARATH	1080	998	1072	59.8	87	23	12	105.5	3.3e-22	sp|Q9C5U0|AHK4_ARATH Histidine kinase 4 OS=Arabidopsis thaliana OX=3702 GN=AHK4 PE=1 SV=1
Unigene0000685	279	3	269	sp|A1A699|OHK6_ORYSJ	970	879	965	56.8	95	27	14	104	9.6e-22	sp|A1A699|OHK6_ORYSJ Probable histidine kinase 6 OS=Oryza sativa subsp. japonica OX=39947 GN=HK6 PE=1 SV=1
Unigene0000685	279	6	257	sp|A2YFR6|OHK1_ORYSI	968	870	964	34.7	95	51	11	58.9	3.5e-08	sp|A2YFR6|OHK1_ORYSI Probable histidine kinase 1 OS=Oryza sativa subsp. indica OX=39946 GN=HK1 PE=3 SV=1
Unigene0000685	279	6	257	sp|A3BE68|OHK1_ORYSJ	968	870	964	34.7	95	51	11	58.9	3.5e-08	sp|A3BE68|OHK1_ORYSJ Probable histidine kinase 1 OS=Oryza sativa subsp. japonica OX=39947 GN=HK1 PE=2 SV=1
Unigene0000685	279	3	257	sp|Q54YZ9|DHKJ_DICDI	2062	1781	1847	36.5	85	36	18	55.1	5.1e-07	sp|Q54YZ9|DHKJ_DICDI Hybrid signal transduction histidine kinase J OS=Dictyostelium discoideum OX=44689 GN=dhkJ PE=3 SV=2
Unigene0000685	279	3	224	sp|Q54YH4|DHKB_DICDI	1969	1891	1955	36.5	74	38	9	53.5	1.5e-06	sp|Q54YH4|DHKB_DICDI Hybrid signal transduction histidine kinase B OS=Dictyostelium discoideum OX=44689 GN=dhkB PE=1 SV=1
Unigene0000686	947	50	910	sp|P14065|GCY1_YEAST	312	8	311	46.4	306	143	21	278.9	7.3e-74	sp|P14065|GCY1_YEAST Glycerol 2-dehydrogenase (NADP(+)) OS=Saccharomyces cerevisiae (strain ATCC 204508 / S288c) OX=559292 GN=GCY1 PE=1 SV=1
Unigene0000686	947	50	859	sp|Q12458|YPR1_YEAST	312	8	291	44.8	286	140	18	253.1	4.3e-66	sp|Q12458|YPR1_YEAST Putative reductase 1 OS=Saccharomyces cerevisiae (strain ATCC 204508 / S288c) OX=559292 GN=YPR1 PE=1 SV=1
Unigene0000686	947	47	922	sp|Q3ZFI7|GAR1_HYPJE	309	1	302	42.5	306	158	18	238.4	1.1e-61	sp|Q3ZFI7|GAR1_HYPJE D-galacturonate reductase OS=Hypocrea jecorina OX=51453 GN=gar1 PE=1 SV=1
Unigene0000686	947	44	859	sp|Q10494|YDG7_SCHPO	321	10	296	41.9	291	146	23	218.8	9.0e-56	sp|Q10494|YDG7_SCHPO Uncharacterized oxidoreductase C26F1.07 OS=Schizosaccharomyces pombe (strain 972 / ATCC 24843) OX=284812 GN=SPAC26F1.07 PE=3 SV=1
Unigene0000686	947	59	859	sp|P27800|ALDX_SPOSA	323	4	284	42.8	285	141	22	218.4	1.2e-55	sp|P27800|ALDX_SPOSA Aldehyde reductase 1 OS=Sporidiobolus salmonicolor OX=5005 GN=ARI PE=1 SV=3
Unigene0000686	947	53	862	sp|A0QV10|Y2408_MYCS2	275	2	259	44.1	272	136	16	215.7	7.6e-55	sp|A0QV10|Y2408_MYCS2 Aldo-keto reductase MSMEG_2408/MSMEI_2347 OS=Mycolicibacterium smegmatis (strain ATCC 700084 / mc(2)155) OX=246196 GN=MSMEG_2408 PE=1 SV=1
Unigene0000686	947	62	895	sp|Q9M338|AKRCB_ARATH	315	8	297	41.3	300	144	32	214.5	1.7e-54	sp|Q9M338|AKRCB_ARATH Aldo-keto reductase family 4 member C11 OS=Arabidopsis thaliana OX=3702 GN=AKR4C11 PE=1 SV=1
Unigene0000686	947	62	859	sp|Q84TF0|AKRCA_ARATH	314	8	285	42.5	280	145	16	213.4	3.8e-54	sp|Q84TF0|AKRCA_ARATH Aldo-keto reductase family 4 member C10 OS=Arabidopsis thaliana OX=3702 GN=AKR4C10 PE=1 SV=1
Unigene0000686	947	38	859	sp|O42888|YBN4_SCHPO	325	7	295	39.2	293	155	23	209.5	5.5e-53	sp|O42888|YBN4_SCHPO Uncharacterized oxidoreductase C8E4.04 OS=Schizosaccharomyces pombe (strain 972 / ATCC 24843) OX=284812 GN=SPBC8E4.04 PE=3 SV=1
Unigene0000686	947	50	868	sp|Q0GYU5|GLD1_HYPJE	331	3	296	42.5	299	141	31	208.4	1.2e-52	sp|Q0GYU5|GLD1_HYPJE D/L-glyceraldehyde reductase OS=Hypocrea jecorina OX=51453 GN=gld1 PE=1 SV=1
Unigene0000686	947	65	859	sp|P22045|PGFS_LEIMA	284	10	269	43.7	270	137	15	206.5	4.6e-52	sp|P22045|PGFS_LEIMA 9,11-endoperoxide prostaglandin H2 reductase OS=Leishmania major OX=5664 GN=P100/11E PE=1 SV=3
Unigene0000686	947	68	886	sp|A3PXT0|Y1919_MYCSJ	276	8	268	40.2	276	147	18	204.9	1.3e-51	sp|A3PXT0|Y1919_MYCSJ Aldo-keto reductase Mjls_1919 OS=Mycobacterium sp. (strain JLS) OX=164757 GN=Mjls_1919 PE=3 SV=1
Unigene0000686	947	68	880	sp|O08782|ALD2_CRIGR	316	7	299	38.9	298	150	32	204.5	1.8e-51	sp|O08782|ALD2_CRIGR Aldose reductase-related protein 2 OS=Cricetulus griseus OX=10029 GN=AKR1B8 PE=1 SV=3
Unigene0000686	947	38	883	sp|Q0PGJ6|AKRC9_ARATH	315	2	293	40.9	296	157	18	204.1	2.3e-51	sp|Q0PGJ6|AKRC9_ARATH NADPH-dependent aldo-keto reductase, chloroplastic OS=Arabidopsis thaliana OX=3702 GN=AKR4C9 PE=1 SV=1
Unigene0000686	947	68	865	sp|A1UEC6|Y1985_MYCSK	276	8	261	40.9	269	141	18	203.4	3.9e-51	sp|A1UEC6|Y1985_MYCSK Aldo-keto reductase Mkms_1985 OS=Mycobacterium sp. (strain KMS) OX=189918 GN=Mkms_1985 PE=3 SV=1
Unigene0000686	947	47	874	sp|Q9JII6|AK1A1_MOUSE	325	1	297	37.1	299	163	25	202.6	6.7e-51	sp|Q9JII6|AK1A1_MOUSE Aldo-keto reductase family 1 member A1 OS=Mus musculus OX=10090 GN=Akr1a1 PE=1 SV=3
Unigene0000686	947	47	874	sp|P51635|AK1A1_RAT	325	1	297	37.1	299	163	25	201.8	1.1e-50	sp|P51635|AK1A1_RAT Aldo-keto reductase family 1 member A1 OS=Rattus norvegicus OX=10116 GN=Akr1a1 PE=1 SV=2
Unigene0000686	947	44	925	sp|Q4DJ07|PGFS_TRYCC	283	2	282	38.9	298	161	21	200.3	3.3e-50	sp|Q4DJ07|PGFS_TRYCC 9,11-endoperoxide prostaglandin H2 reductase OS=Trypanosoma cruzi (strain CL Brener) OX=353153 GN=Tc00.1047053511287.49 PE=1 SV=2
Unigene0000686	947	59	865	sp|A4TE41|Y4205_MYCGI	279	9	265	42.4	271	140	16	198.4	1.3e-49	sp|A4TE41|Y4205_MYCGI Aldo-keto reductase Mflv_4205 OS=Mycolicibacterium gilvum (strain PYR-GCK) OX=350054 GN=Mflv_4205 PE=3 SV=1
Unigene0000686	947	68	874	sp|Q3ZCJ2|AK1A1_BOVIN	325	8	297	37.3	292	158	25	198	1.6e-49	sp|Q3ZCJ2|AK1A1_BOVIN Aldo-keto reductase family 1 member A1 OS=Bos taurus OX=9913 GN=AKR1A1 PE=1 SV=1
Unigene0000687	508	495	178	sp|A8PCG3|RL44_COPC7	106	1	106	86.8	106	14	0	194.1	1.3e-48	sp|A8PCG3|RL44_COPC7 Large ribosomal subunit protein eL42 OS=Coprinopsis cinerea (strain Okayama-7 / 130 / ATCC MYA-4618 / FGSC 9003) OX=240176 GN=RPL44 PE=3 SV=2
Unigene0000687	508	495	178	sp|Q9UWE4|RL44_COPCI	106	1	106	86.8	106	14	0	194.1	1.3e-48	sp|Q9UWE4|RL44_COPCI Large ribosomal subunit protein eL42 OS=Coprinopsis cinerea OX=5346 GN=RPL44 PE=3 SV=3
Unigene0000687	508	495	178	sp|O59870|RL44_PHARH	106	1	106	87.7	106	13	0	194.1	1.3e-48	sp|O59870|RL44_PHARH Large ribosomal subunit protein eL42 OS=Phaffia rhodozyma OX=264483 GN=RPL44 PE=3 SV=3
Unigene0000687	508	495	178	sp|P0CQ51|RL44_CRYNB	106	1	106	84.9	106	16	0	189.5	3.1e-47	sp|P0CQ51|RL44_CRYNB Large ribosomal subunit protein eL42 OS=Cryptococcus neoformans var. neoformans serotype D (strain B-3501A) OX=283643 GN=RPL44 PE=3 SV=1
Unigene0000687	508	495	178	sp|P0CQ50|RL44_CRYNJ	106	1	106	84.9	106	16	0	189.5	3.1e-47	sp|P0CQ50|RL44_CRYNJ Large ribosomal subunit protein eL42 OS=Cryptococcus neoformans var. neoformans serotype D (strain JEC21 / ATCC MYA-565) OX=214684 GN=RPL44 PE=3 SV=1
Unigene0000687	508	495	178	sp|Q4PNY0|RL44_PICKU	106	1	106	85.8	106	15	0	188	9.1e-47	sp|Q4PNY0|RL44_PICKU Large ribosomal subunit protein eL42 OS=Pichia kudriavzevii OX=4909 GN=RPL44 PE=3 SV=3
Unigene0000687	508	495	178	sp|P52809|RL44_CYBJA	106	1	106	85.8	106	15	0	187.2	1.6e-46	sp|P52809|RL44_CYBJA Large ribosomal subunit protein eL42 OS=Cyberlindnera jadinii OX=4903 GN=RPL44 PE=3 SV=2
Unigene0000687	508	495	178	sp|Q6BLK0|RL44_DEBHA	106	1	106	84	106	17	0	184.5	1.0e-45	sp|Q6BLK0|RL44_DEBHA Large ribosomal subunit protein eL42 OS=Debaryomyces hansenii (strain ATCC 36239 / CBS 767 / BCRC 21394 / JCM 1990 / NBRC 0083 / IGC 2968) OX=284592 GN=RPL44 PE=3 SV=3
Unigene0000687	508	495	178	sp|P31866|RL44_PICGU	106	1	106	84	106	17	0	184.5	1.0e-45	sp|P31866|RL44_PICGU Large ribosomal subunit protein eL42 OS=Meyerozyma guilliermondii (strain ATCC 6260 / CBS 566 / DSM 6381 / JCM 1539 / NBRC 10279 / NRRL Y-324) OX=294746 GN=RPL44 PE=3 SV=3
Unigene0000687	508	495	178	sp|Q9UVB8|RL44_WICCF	106	1	106	83	106	18	0	183.7	1.7e-45	sp|Q9UVB8|RL44_WICCF Large ribosomal subunit protein eL42 OS=Wickerhamomyces ciferrii (strain ATCC 14091 / BCRC 22168 / CBS 111 / JCM 3599 / NBRC 0793 / NRRL Y-1031 F-60-10) OX=1206466 GN=RPL44 PE=3 SV=3
Unigene0000687	508	495	178	sp|P0CX27|RL44A_YEAST	106	1	106	83	106	18	0	182.2	5.0e-45	sp|P0CX27|RL44A_YEAST Large ribosomal subunit protein eL42A OS=Saccharomyces cerevisiae (strain ATCC 204508 / S288c) OX=559292 GN=RPL42A PE=1 SV=1
Unigene0000687	508	495	178	sp|P0CX28|RL44B_YEAST	106	1	106	83	106	18	0	182.2	5.0e-45	sp|P0CX28|RL44B_YEAST Large ribosomal subunit protein eL42B OS=Saccharomyces cerevisiae (strain ATCC 204508 / S288c) OX=559292 GN=RPL42B PE=1 SV=1
Unigene0000687	508	495	178	sp|Q6CFS7|RL44_YARLI	106	1	106	82.1	106	19	0	181.4	8.6e-45	sp|Q6CFS7|RL44_YARLI Large ribosomal subunit protein eL42 OS=Yarrowia lipolytica (strain CLIB 122 / E 150) OX=284591 GN=RPL44 PE=3 SV=3
Unigene0000687	508	495	178	sp|Q00477|RL44P_CANMA	106	1	106	81.1	106	20	0	180.6	1.5e-44	sp|Q00477|RL44P_CANMA Large ribosomal subunit protein eL42P OS=Candida maltosa OX=5479 GN=L41P1A PE=3 SV=3
Unigene0000687	508	495	178	sp|A0A1D8PEV4|RL44_CANAL	106	1	106	82.1	106	19	0	180.6	1.5e-44	sp|A0A1D8PEV4|RL44_CANAL Large ribosomal subunit protein eL42 OS=Candida albicans (strain SC5314 / ATCC MYA-2876) OX=237561 GN=RPL44 PE=1 SV=1
Unigene0000687	508	495	178	sp|P27076|RL44_KLUMA	106	1	106	80.2	106	21	0	178.7	5.5e-44	sp|P27076|RL44_KLUMA Large ribosomal subunit protein eL42 OS=Kluyveromyces marxianus OX=4911 GN=RPL44 PE=3 SV=2
Unigene0000687	508	495	178	sp|P31027|RL44_KLULA	106	1	106	80.2	106	21	0	178.3	7.2e-44	sp|P31027|RL44_KLULA Large ribosomal subunit protein eL42 OS=Kluyveromyces lactis (strain ATCC 8585 / CBS 2359 / DSM 70799 / NBRC 1267 / NRRL Y-1140 / WM37) OX=284590 GN=RPL44 PE=1 SV=2
Unigene0000687	508	495	178	sp|P31028|RL44_SCHOC	106	1	106	80.2	106	21	0	178.3	7.2e-44	sp|P31028|RL44_SCHOC Large ribosomal subunit protein eL42 OS=Schwanniomyces occidentalis OX=27300 GN=RPL44 PE=3 SV=2
Unigene0000687	508	495	178	sp|Q9UTI8|RL44_SCHPO	106	1	106	77.4	106	24	0	175.3	6.1e-43	sp|Q9UTI8|RL44_SCHPO Large ribosomal subunit protein eL42 OS=Schizosaccharomyces pombe (strain 972 / ATCC 24843) OX=284812 GN=rpl42 PE=1 SV=3
Unigene0000687	508	495	178	sp|Q754N8|RL44_EREGS	106	1	106	79.2	106	22	0	174.5	1.0e-42	sp|Q754N8|RL44_EREGS Large ribosomal subunit protein eL42 OS=Eremothecium gossypii (strain ATCC 10895 / CBS 109.51 / FGSC 9923 / NRRL Y-1056) OX=284811 GN=RPL44 PE=3 SV=3
Unigene0000704	5275	5163	172	sp|Q2RBN7|CLH1_ORYSJ	1708	1	1664	93.6	1664	107	0	3113.9	0.0e+00	sp|Q2RBN7|CLH1_ORYSJ Clathrin heavy chain 1 OS=Oryza sativa subsp. japonica OX=39947 GN=Os11g0104900 PE=3 SV=1
Unigene0000704	5275	5163	172	sp|Q2QYW2|CLH2_ORYSJ	1708	1	1664	93.4	1664	109	0	3111.6	0.0e+00	sp|Q2QYW2|CLH2_ORYSJ Clathrin heavy chain 2 OS=Oryza sativa subsp. japonica OX=39947 GN=Os12g0104800 PE=3 SV=1
Unigene0000704	5275	5163	172	sp|Q0WNJ6|CLAH1_ARATH	1705	1	1664	91.6	1664	139	0	3060.4	0.0e+00	sp|Q0WNJ6|CLAH1_ARATH Clathrin heavy chain 1 OS=Arabidopsis thaliana OX=3702 GN=CHC1 PE=1 SV=1
Unigene0000704	5275	5163	172	sp|Q0WLB5|CLAH2_ARATH	1703	1	1664	91.5	1664	141	0	3055.8	0.0e+00	sp|Q0WLB5|CLAH2_ARATH Clathrin heavy chain 2 OS=Arabidopsis thaliana OX=3702 GN=CHC2 PE=1 SV=1
Unigene0000704	5275	5145	193	sp|Q68FD5|CLH1_MOUSE	1675	6	1636	57.1	1653	685	24	1875.5	0.0e+00	sp|Q68FD5|CLH1_MOUSE Clathrin heavy chain 1 OS=Mus musculus OX=10090 GN=Cltc PE=1 SV=3
Unigene0000704	5275	5145	193	sp|P49951|CLH1_BOVIN	1675	6	1636	57	1653	686	24	1875.1	0.0e+00	sp|P49951|CLH1_BOVIN Clathrin heavy chain 1 OS=Bos taurus OX=9913 GN=CLTC PE=1 SV=1
Unigene0000704	5275	5145	193	sp|Q00610|CLH1_HUMAN	1675	6	1636	57	1653	686	24	1875.1	0.0e+00	sp|Q00610|CLH1_HUMAN Clathrin heavy chain 1 OS=Homo sapiens OX=9606 GN=CLTC PE=1 SV=5
Unigene0000704	5275	5145	193	sp|P11442|CLH1_RAT	1675	6	1636	57	1653	687	24	1870.5	0.0e+00	sp|P11442|CLH1_RAT Clathrin heavy chain 1 OS=Rattus norvegicus OX=10116 GN=Cltc PE=1 SV=3
Unigene0000704	5275	5145	184	sp|P29742|CLH_DROME	1678	6	1638	56.8	1657	688	27	1866.7	0.0e+00	sp|P29742|CLH_DROME Clathrin heavy chain OS=Drosophila melanogaster OX=7227 GN=Chc PE=1 SV=1
Unigene0000704	5275	5145	235	sp|P53675|CLH2_HUMAN	1640	6	1624	55.9	1640	699	24	1815	0.0e+00	sp|P53675|CLH2_HUMAN Clathrin heavy chain 2 OS=Homo sapiens OX=9606 GN=CLTCL1 PE=1 SV=2
Unigene0000704	5275	5151	202	sp|P25870|CLH_DICDI	1694	3	1634	55	1655	716	28	1809.3	0.0e+00	sp|P25870|CLH_DICDI Clathrin heavy chain OS=Dictyostelium discoideum OX=44689 GN=chcA PE=1 SV=1
Unigene0000704	5275	5145	202	sp|P34574|CLH_CAEEL	1681	4	1641	54.5	1654	731	22	1775	0.0e+00	sp|P34574|CLH_CAEEL Probable clathrin heavy chain 1 OS=Caenorhabditis elegans OX=6239 GN=chc-1 PE=1 SV=1
Unigene0000704	5275	5157	235	sp|Q10161|CLH_SCHPO	1666	2	1623	49.1	1642	815	21	1587.4	0.0e+00	sp|Q10161|CLH_SCHPO Probable clathrin heavy chain OS=Schizosaccharomyces pombe (strain 972 / ATCC 24843) OX=284812 GN=chc1 PE=1 SV=1
Unigene0000704	5275	5154	223	sp|P22137|CLH_YEAST	1653	2	1635	44.2	1650	898	22	1439.5	0.0e+00	sp|P22137|CLH_YEAST Clathrin heavy chain OS=Saccharomyces cerevisiae (strain ATCC 204508 / S288c) OX=559292 GN=CHC1 PE=1 SV=1
Unigene0000706	3722	1217	537	sp|Q9ZQ31|STY13_ARATH	411	153	337	32.5	228	110	44	97.1	1.6e-18	sp|Q9ZQ31|STY13_ARATH Serine/threonine-protein kinase STY13 OS=Arabidopsis thaliana OX=3702 GN=STY13 PE=1 SV=2
Unigene0000706	3722	1007	303	sp|Q75DK7|STE20_EREGS	970	755	943	29.6	240	113	56	94.7	7.7e-18	sp|Q75DK7|STE20_EREGS Serine/threonine-protein kinase STE20 OS=Eremothecium gossypii (strain ATCC 10895 / CBS 109.51 / FGSC 9923 / NRRL Y-1056) OX=284811 GN=STE20 PE=3 SV=2
Unigene0000706	3722	1007	411	sp|Q2VWQ3|STE20_TALMA	642	433	609	32.2	205	105	34	94	1.3e-17	sp|Q2VWQ3|STE20_TALMA Serine/threonine-protein kinase pakA OS=Talaromyces marneffei OX=37727 GN=pakA PE=3 SV=1
Unigene0000706	3722	1007	411	sp|Q2ULU3|STE20_ASPOR	848	639	815	32.7	205	104	34	93.2	2.3e-17	sp|Q2ULU3|STE20_ASPOR Serine/threonine-protein kinase ste20 OS=Aspergillus oryzae (strain ATCC 42149 / RIB 40) OX=510516 GN=ste20 PE=3 SV=1
Unigene0000706	3722	1007	405	sp|O88643|PAK1_MOUSE	545	342	516	33	206	102	36	92	5.0e-17	sp|O88643|PAK1_MOUSE Serine/threonine-protein kinase PAK 1 OS=Mus musculus OX=10090 GN=Pak1 PE=1 SV=1
Unigene0000706	3722	1007	411	sp|Q5BBL3|STE20_EMENI	848	639	815	34.1	205	101	34	91.3	8.6e-17	sp|Q5BBL3|STE20_EMENI Serine/threonine-protein kinase ste20 OS=Emericella nidulans (strain FGSC A4 / ATCC 38163 / CBS 112.46 / NRRL 194 / M139) OX=227321 GN=ste20 PE=3 SV=1
Unigene0000706	3722	1007	438	sp|Q4WHP3|STE20_ASPFU	815	606	769	32.8	192	99	30	90.5	1.5e-16	sp|Q4WHP3|STE20_ASPFU Serine/threonine-protein kinase ste20 OS=Aspergillus fumigatus (strain ATCC MYA-4609 / CBS 101355 / FGSC A1100 / Af293) OX=330879 GN=ste20 PE=3 SV=2
Unigene0000706	3722	1007	405	sp|Q08E52|PAK1_BOVIN	544	341	515	32.5	206	103	36	89.7	2.5e-16	sp|Q08E52|PAK1_BOVIN Serine/threonine-protein kinase PAK 1 OS=Bos taurus OX=9913 GN=PAK1 PE=1 SV=1
Unigene0000706	3722	1007	405	sp|Q13153|PAK1_HUMAN	545	342	516	32.5	206	103	36	89.7	2.5e-16	sp|Q13153|PAK1_HUMAN Serine/threonine-protein kinase PAK 1 OS=Homo sapiens OX=9606 GN=PAK1 PE=1 SV=2
Unigene0000706	3722	1007	405	sp|P35465|PAK1_RAT	544	341	515	32.5	206	103	36	89.7	2.5e-16	sp|P35465|PAK1_RAT Serine/threonine-protein kinase PAK 1 OS=Rattus norvegicus OX=10116 GN=Pak1 PE=1 SV=3
Unigene0000706	3722	1007	405	sp|O75914|PAK3_HUMAN	559	355	529	32.5	206	103	36	89.4	3.2e-16	sp|O75914|PAK3_HUMAN Serine/threonine-protein kinase PAK 3 OS=Homo sapiens OX=9606 GN=PAK3 PE=1 SV=2
Unigene0000706	3722	1007	405	sp|Q61036|PAK3_MOUSE	559	355	529	32.5	206	103	36	89.4	3.2e-16	sp|Q61036|PAK3_MOUSE Serine/threonine-protein kinase PAK 3 OS=Mus musculus OX=10090 GN=Pak3 PE=1 SV=2
Unigene0000706	3722	1007	405	sp|Q7YQL4|PAK3_PANTR	559	355	529	32.5	206	103	36	89.4	3.2e-16	sp|Q7YQL4|PAK3_PANTR Serine/threonine-protein kinase PAK 3 OS=Pan troglodytes OX=9598 GN=PAK3 PE=2 SV=1
Unigene0000706	3722	1007	405	sp|Q7YQL3|PAK3_PONPY	559	355	529	32.5	206	103	36	89.4	3.2e-16	sp|Q7YQL3|PAK3_PONPY Serine/threonine-protein kinase PAK 3 OS=Pongo pygmaeus OX=9600 GN=PAK3 PE=2 SV=1
Unigene0000706	3722	1007	405	sp|Q62829|PAK3_RAT	544	340	514	32.5	206	103	36	89.4	3.2e-16	sp|Q62829|PAK3_RAT Serine/threonine-protein kinase PAK 3 OS=Rattus norvegicus OX=10116 GN=Pak3 PE=1 SV=1
Unigene0000706	3722	1007	399	sp|Q7RZD3|STE20_NEUCR	954	746	931	30.8	214	109	39	89.4	3.2e-16	sp|Q7RZD3|STE20_NEUCR Serine/threonine-protein kinase ste20 OS=Neurospora crassa (strain ATCC 24698 / 74-OR23-1A / CBS 708.71 / DSM 1257 / FGSC 987) OX=367110 GN=stk-4 PE=3 SV=1
Unigene0000706	3722	1007	405	sp|Q8AXB4|PAK3_XENLA	564	360	534	32.5	206	103	36	89	4.2e-16	sp|Q8AXB4|PAK3_XENLA Serine/threonine-protein kinase PAK 3 OS=Xenopus laevis OX=8355 GN=pak3 PE=2 SV=1
Unigene0000706	3722	1007	366	sp|Q9HFW2|CLA4_EREGS	793	589	784	30.3	218	126	26	88.2	7.2e-16	sp|Q9HFW2|CLA4_EREGS Serine/threonine-protein kinase CLA4 OS=Eremothecium gossypii (strain ATCC 10895 / CBS 109.51 / FGSC 9923 / NRRL Y-1056) OX=284811 GN=CLA4 PE=3 SV=1
Unigene0000706	3722	1007	411	sp|Q8BTW9|PAK4_MOUSE	593	395	571	33.5	209	97	42	88.2	7.2e-16	sp|Q8BTW9|PAK4_MOUSE Serine/threonine-protein kinase PAK 4 OS=Mus musculus OX=10090 GN=Pak4 PE=1 SV=1
Unigene0000706	3722	1007	474	sp|Q6FN53|STE20_CANGA	915	692	841	35.8	179	85	30	88.2	7.2e-16	sp|Q6FN53|STE20_CANGA Serine/threonine-protein kinase STE20 OS=Candida glabrata (strain ATCC 2001 / BCRC 20586 / JCM 3761 / NBRC 0622 / NRRL Y-65 / CBS 138) OX=284593 GN=STE20 PE=3 SV=1
Unigene0000709	957	855	88	sp|Q9SCU0|SDR2A_ARATH	303	31	297	38	274	145	25	147.9	2.0e-34	sp|Q9SCU0|SDR2A_ARATH Short-chain dehydrogenase reductase 2a OS=Arabidopsis thaliana OX=3702 GN=SDR2a PE=3 SV=1
Unigene0000709	957	837	94	sp|Q56840|HCDR1_XANP2	250	5	248	38.8	250	145	8	146	7.5e-34	sp|Q56840|HCDR1_XANP2 2-(R)-hydroxypropyl-CoM dehydrogenase OS=Xanthobacter autotrophicus (strain ATCC BAA-1158 / Py2) OX=78245 GN=xecD1 PE=1 SV=3
Unigene0000709	957	861	76	sp|P46331|YXBG_BACSU	273	1	259	35.4	268	158	15	146	7.5e-34	sp|P46331|YXBG_BACSU Uncharacterized oxidoreductase YxbG OS=Bacillus subtilis (strain 168) OX=224308 GN=yxbG PE=3 SV=2
Unigene0000709	957	855	97	sp|Q9X248|FABG_THEMA	246	2	244	39.4	254	142	12	144.8	1.7e-33	sp|Q9X248|FABG_THEMA 3-oxoacyl-[acyl-carrier-protein] reductase FabG OS=Thermotoga maritima (strain ATCC 43589 / DSM 3109 / JCM 10099 / NBRC 100826 / MSB8) OX=243274 GN=fabG PE=3 SV=1
Unigene0000709	957	861	100	sp|D4A1J4|DHRS6_RAT	245	1	242	35.4	257	148	18	142.9	6.4e-33	sp|D4A1J4|DHRS6_RAT Dehydrogenase/reductase SDR family member 6 OS=Rattus norvegicus OX=10116 GN=Bdh2 PE=1 SV=2
Unigene0000709	957	861	100	sp|Q8JZV9|DHRS6_MOUSE	245	1	242	34.2	257	151	18	142.5	8.3e-33	sp|Q8JZV9|DHRS6_MOUSE Dehydrogenase/reductase SDR family member 6 OS=Mus musculus OX=10090 GN=Bdh2 PE=1 SV=1
Unigene0000709	957	861	94	sp|Q8GAV9|CPNA_COMS9	250	1	248	39.4	259	143	14	141	2.4e-32	sp|Q8GAV9|CPNA_COMS9 Cyclopentanol dehydrogenase OS=Comamonas sp. (strain NCIMB 9872) OX=213664 GN=cpnA PE=1 SV=1
Unigene0000709	957	861	94	sp|Q937L4|CPNA_COMTE	250	1	248	39.4	259	143	14	141	2.4e-32	sp|Q937L4|CPNA_COMTE Cyclopentanol dehydrogenase OS=Comamonas testosteroni OX=285 GN=cpnA PE=1 SV=1
Unigene0000709	957	861	100	sp|Q3KPT7|DHRS6_XENLA	245	1	242	34.1	258	150	20	136.3	6.0e-31	sp|Q3KPT7|DHRS6_XENLA Dehydrogenase/reductase SDR family member 6 OS=Xenopus laevis OX=8355 GN=bdh2 PE=2 SV=1
Unigene0000709	957	855	94	sp|Q5FPE5|GMDH_GLUOX	266	8	255	34.9	255	158	8	134	3.0e-30	sp|Q5FPE5|GMDH_GLUOX Glucose 1-dehydrogenase OS=Gluconobacter oxydans (strain 621H) OX=290633 GN=GOX2015 PE=1 SV=1
Unigene0000709	957	855	91	sp|A3F5F0|SDH_SINHE	278	13	264	35.3	258	158	9	131	2.5e-29	sp|A3F5F0|SDH_SINHE Secoisolariciresinol dehydrogenase OS=Sinopodophyllum hexandrum OX=93608 GN=SDH PE=1 SV=1
Unigene0000709	957	852	100	sp|Q9KJF1|BBSD_THAAR	248	3	242	36.4	253	146	15	130.6	3.3e-29	sp|Q9KJF1|BBSD_THAAR (2S)-[(R)-hydroxy(phenyl)methyl]succinyl-CoA dehydrogenase subunit BbsD OS=Thauera aromatica OX=59405 GN=bbsD PE=1 SV=1
Unigene0000709	957	855	73	sp|H9XP47|MBDH_SERMA	251	2	249	34.5	264	154	19	129.8	5.6e-29	sp|H9XP47|MBDH_SERMA Meso-2,3-butanediol dehydrogenase OS=Serratia marcescens OX=615 GN=budC PE=1 SV=1
Unigene0000709	957	855	100	sp|O80713|SDR3A_ARATH	257	5	250	35.8	257	149	16	129.4	7.3e-29	sp|O80713|SDR3A_ARATH Short-chain dehydrogenase reductase 3a OS=Arabidopsis thaliana OX=3702 GN=SDR3a PE=2 SV=1
Unigene0000709	957	855	91	sp|Q94KL8|SILD_PODPE	278	13	264	34.9	258	159	9	129	9.5e-29	sp|Q94KL8|SILD_PODPE Secoisolariciresinol dehydrogenase (Fragment) OS=Podophyllum peltatum OX=35933 PE=1 SV=1
Unigene0000709	957	918	94	sp|F4J2Z7|SDR4_ARATH	298	20	291	34.4	282	168	17	127.1	3.6e-28	sp|F4J2Z7|SDR4_ARATH Short-chain dehydrogenase reductase 4 OS=Arabidopsis thaliana OX=3702 GN=SDR4 PE=2 SV=1
Unigene0000709	957	855	97	sp|Q75KH3|GRDH_ORYSJ	300	37	296	35.2	267	152	21	123.2	5.2e-27	sp|Q75KH3|GRDH_ORYSJ Glucose and ribitol dehydrogenase homolog OS=Oryza sativa subsp. japonica OX=39947 GN=Os05g0140800 PE=2 SV=2
Unigene0000709	957	852	100	sp|C8WGQ3|3BHD2_EGGLE	260	10	256	35	257	151	16	122.9	6.8e-27	sp|C8WGQ3|3BHD2_EGGLE 3beta-hydroxysteroid dehydrogenase 2 OS=Eggerthella lenta (strain ATCC 25559 / DSM 2243 / CCUG 17323 / JCM 9979 / KCTC 3265 / NCTC 11813 / VPI 0255 / 1899 B) OX=479437 GN=Elen_1325 PE=1 SV=1
Unigene0000709	957	840	94	sp|P9WES5|FOGB_ASPRC	273	6	268	34.6	266	154	20	121.7	1.5e-26	sp|P9WES5|FOGB_ASPRC Short-chain dehydrogenase fogB OS=Aspergillus ruber (strain CBS 135680) OX=1388766 GN=fogB PE=3 SV=1
Unigene0000709	957	855	100	sp|Q94K41|SDR3B_ARATH	257	5	251	34.4	256	155	13	121.7	1.5e-26	sp|Q94K41|SDR3B_ARATH Short-chain dehydrogenase reductase 3b OS=Arabidopsis thaliana OX=3702 GN=SDR3b PE=2 SV=1
Unigene0000710	1205	1108	32	sp|Q04894|ADH6_YEAST	360	1	358	51.8	361	169	5	378.3	1.1e-103	sp|Q04894|ADH6_YEAST NADP-dependent alcohol dehydrogenase 6 OS=Saccharomyces cerevisiae (strain ATCC 204508 / S288c) OX=559292 GN=ADH6 PE=1 SV=1
Unigene0000710	1205	1108	32	sp|P25377|ADH7_YEAST	361	1	359	46.7	362	187	6	339.7	4.5e-92	sp|P25377|ADH7_YEAST NADP-dependent alcohol dehydrogenase 7 OS=Saccharomyces cerevisiae (strain ATCC 204508 / S288c) OX=559292 GN=ADH7 PE=1 SV=1
Unigene0000710	1205	1051	53	sp|C0SPA5|ADHA_BACSU	349	18	344	39.3	333	196	6	234.2	2.6e-60	sp|C0SPA5|ADHA_BACSU Probable formaldehyde dehydrogenase AdhA OS=Bacillus subtilis (strain 168) OX=224308 GN=adhA PE=2 SV=1
Unigene0000710	1205	1072	53	sp|Q9SJ25|CADH2_ARATH	376	14	347	38.8	343	198	12	233.8	3.4e-60	sp|Q9SJ25|CADH2_ARATH Cinnamyl alcohol dehydrogenase 2 OS=Arabidopsis thaliana OX=3702 GN=CAD2 PE=1 SV=1
Unigene0000710	1205	1072	53	sp|Q9SJ10|CADH3_ARATH	375	14	346	38.8	343	197	13	227.3	3.2e-58	sp|Q9SJ10|CADH3_ARATH Cinnamyl alcohol dehydrogenase 3 OS=Arabidopsis thaliana OX=3702 GN=CAD3 PE=1 SV=1
Unigene0000710	1205	1015	53	sp|P0CH36|ADHC1_MYCS2	349	27	342	40.4	322	185	7	226.5	5.5e-58	sp|P0CH36|ADHC1_MYCS2 NADP-dependent alcohol dehydrogenase C 1 OS=Mycolicibacterium smegmatis (strain ATCC 700084 / mc(2)155) OX=246196 GN=adhc1 PE=1 SV=1
Unigene0000710	1205	1015	53	sp|P0CH37|ADHC2_MYCS2	349	27	342	40.4	322	185	7	226.5	5.5e-58	sp|P0CH37|ADHC2_MYCS2 NADP-dependent alcohol dehydrogenase C 2 OS=Mycolicibacterium smegmatis (strain ATCC 700084 / mc(2)155) OX=246196 GN=adhC2 PE=1 SV=1
Unigene0000710	1205	1015	53	sp|P0A4X1|ADHC_MYCBO	346	27	341	39.3	321	189	6	226.5	5.5e-58	sp|P0A4X1|ADHC_MYCBO NADP-dependent alcohol dehydrogenase C OS=Mycobacterium bovis (strain ATCC BAA-935 / AF2122/97) OX=233413 GN=adhC PE=3 SV=1
Unigene0000710	1205	1015	53	sp|P9WQC4|ADHC_MYCTO	346	27	341	39.3	321	189	6	226.5	5.5e-58	sp|P9WQC4|ADHC_MYCTO NADP-dependent alcohol dehydrogenase C OS=Mycobacterium tuberculosis (strain CDC 1551 / Oshkosh) OX=83331 GN=adhC PE=3 SV=1
Unigene0000710	1205	1015	53	sp|P9WQC5|ADHC_MYCTU	346	27	341	39.3	321	189	6	226.5	5.5e-58	sp|P9WQC5|ADHC_MYCTU NADP-dependent alcohol dehydrogenase C OS=Mycobacterium tuberculosis (strain ATCC 25618 / H37Rv) OX=83332 GN=adhC PE=1 SV=1
Unigene0000710	1205	1015	53	sp|Q337Y2|CADH3_ORYSJ	366	39	354	39.6	323	186	9	224.2	2.7e-57	sp|Q337Y2|CADH3_ORYSJ Probable cinnamyl alcohol dehydrogenase 3 OS=Oryza sativa subsp. japonica OX=39947 GN=CAD3 PE=2 SV=1
Unigene0000710	1205	1033	53	sp|Q9ZRF1|MTDH_FRAAN	359	28	349	38.6	329	193	9	222.6	8.0e-57	sp|Q9ZRF1|MTDH_FRAAN Probable mannitol dehydrogenase OS=Fragaria ananassa OX=3747 GN=CAD PE=2 SV=1
Unigene0000710	1205	1033	53	sp|O65621|CADH6_ARATH	363	31	352	38	329	195	9	222.2	1.0e-56	sp|O65621|CADH6_ARATH Probable cinnamyl alcohol dehydrogenase 6 OS=Arabidopsis thaliana OX=3702 GN=CAD6 PE=2 SV=1
Unigene0000710	1205	1117	53	sp|Q6V4H0|10HGO_CATRO	360	4	351	37.4	358	211	13	221.5	1.8e-56	sp|Q6V4H0|10HGO_CATRO 8-hydroxygeraniol dehydrogenase OS=Catharanthus roseus OX=4058 GN=10HGO PE=1 SV=1
Unigene0000710	1205	1033	53	sp|Q02972|CADH8_ARATH	359	26	347	37.7	329	196	9	220.7	3.0e-56	sp|Q02972|CADH8_ARATH Cinnamyl alcohol dehydrogenase 8 OS=Arabidopsis thaliana OX=3702 GN=CAD8 PE=1 SV=1
Unigene0000710	1205	1102	53	sp|Q2KNL6|GEDH1_OCIBA	360	9	351	36.8	353	210	13	219.5	6.7e-56	sp|Q2KNL6|GEDH1_OCIBA Geraniol dehydrogenase 1 OS=Ocimum basilicum OX=39350 GN=GEDH1 PE=1 SV=1
Unigene0000710	1205	1015	53	sp|P75691|YAHK_ECOLI	349	26	342	39.4	322	189	6	218.4	1.5e-55	sp|P75691|YAHK_ECOLI Aldehyde reductase YahK OS=Escherichia coli (strain K12) OX=83333 GN=yahK PE=1 SV=1
Unigene0000710	1205	1033	53	sp|Q38707|MTDH_APIGR	365	30	351	38	329	195	9	211.5	1.8e-53	sp|Q38707|MTDH_APIGR Mannitol dehydrogenase OS=Apium graveolens OX=4045 GN=MTD PE=1 SV=1
Unigene0000710	1205	1033	53	sp|P42754|MTDH_PETCR	337	7	328	38.3	329	194	9	210.7	3.1e-53	sp|P42754|MTDH_PETCR Mannitol dehydrogenase (Fragment) OS=Petroselinum crispum OX=4043 GN=ELI3 PE=2 SV=1
Unigene0000710	1205	1015	53	sp|Q0J6T3|CADH5_ORYSJ	354	29	343	39.3	323	186	10	210.3	4.1e-53	sp|Q0J6T3|CADH5_ORYSJ Probable cinnamyl alcohol dehydrogenase 5 OS=Oryza sativa subsp. japonica OX=39947 GN=CAD5 PE=3 SV=2
Unigene0000713	358	3	155	sp|Q5VRY1|HSP18_ORYSJ	166	116	166	74.5	51	13	0	80.5	1.4e-14	sp|Q5VRY1|HSP18_ORYSJ 18.0 kDa class II heat shock protein OS=Oryza sativa subsp. japonica OX=39947 GN=HSP18.0 PE=2 SV=1
Unigene0000713	358	3	155	sp|P24632|HSP22_MAIZE	164	114	164	72.5	51	14	0	80.1	1.9e-14	sp|P24632|HSP22_MAIZE 17.8 kDa class II heat shock protein OS=Zea mays OX=4577 PE=2 SV=1
Unigene0000713	358	3	155	sp|P24631|HSP21_MAIZE	161	111	161	72.5	51	14	0	79.7	2.5e-14	sp|P24631|HSP21_MAIZE 17.5 kDa class II heat shock protein OS=Zea mays OX=4577 PE=2 SV=1
Unigene0000713	358	3	155	sp|Q08275|HSP23_MAIZE	154	104	154	70.6	51	15	0	79.7	2.5e-14	sp|Q08275|HSP23_MAIZE 17.0 kDa class II heat shock protein OS=Zea mays OX=4577 GN=HSP18 PE=2 SV=1
Unigene0000713	358	3	155	sp|O82013|HSP21_SOLPE	155	105	155	70.6	51	15	0	78.6	5.5e-14	sp|O82013|HSP21_SOLPE 17.3 kDa class II heat shock protein OS=Solanum peruvianum OX=4082 PE=2 SV=1
Unigene0000713	358	3	155	sp|P29830|HS176_ARATH	155	105	155	72.5	51	14	0	77.8	9.4e-14	sp|P29830|HS176_ARATH 17.6 kDa class II heat shock protein OS=Arabidopsis thaliana OX=3702 GN=HSP17.6 PE=2 SV=1
Unigene0000713	358	3	155	sp|Q6Z6L5|HSP19_ORYSJ	175	115	165	68.6	51	16	0	77.8	9.4e-14	sp|Q6Z6L5|HSP19_ORYSJ 19.0 kDa class II heat shock protein OS=Oryza sativa subsp. japonica OX=39947 GN=HSP19.0 PE=3 SV=1
Unigene0000713	358	3	155	sp|P46516|HSP21_HELAN	160	110	160	70.6	51	15	0	76.3	2.7e-13	sp|P46516|HSP21_HELAN 17.9 kDa class II heat shock protein OS=Helianthus annuus OX=4232 GN=HSP17.9 PE=2 SV=1
Unigene0000713	358	3	155	sp|O81822|HS177_ARATH	156	106	156	68.6	51	16	0	75.9	3.6e-13	sp|O81822|HS177_ARATH 17.7 kDa class II heat shock protein OS=Arabidopsis thaliana OX=3702 GN=HSP17.7 PE=2 SV=1
Unigene0000713	358	3	155	sp|P05477|HSP21_SOYBN	159	109	159	64.7	51	18	0	73.2	2.3e-12	sp|P05477|HSP21_SOYBN 17.9 kDa class II heat shock protein OS=Glycine max OX=3847 GN=HSP17.9-D PE=3 SV=1
Unigene0000713	358	3	155	sp|P19242|HSP21_PEA	152	102	152	66.7	51	17	0	71.6	6.7e-12	sp|P19242|HSP21_PEA 17.1 kDa class II heat shock protein OS=Pisum sativum OX=3888 GN=HSP17.7 PE=1 SV=1
Unigene0000713	358	3	155	sp|Q01545|HSP22_IPONI	167	117	167	66.7	51	17	0	71.2	8.8e-12	sp|Q01545|HSP22_IPONI 18.8 kDa class II heat shock protein OS=Ipomoea nil OX=35883 GN=SHSP-2 PE=2 SV=1
Unigene0000713	358	3	152	sp|Q01544|HSP21_IPONI	155	105	154	64	50	18	0	69.3	3.3e-11	sp|Q01544|HSP21_IPONI 17.2 kDa class II heat shock protein OS=Ipomoea nil OX=35883 GN=SHSP-1 PE=2 SV=1
Unigene0000716	1715	1650	163	sp|Q9XF43|KCS6_ARATH	497	1	497	76.5	497	116	1	799.7	2.2e-230	sp|Q9XF43|KCS6_ARATH 3-ketoacyl-CoA synthase 6 OS=Arabidopsis thaliana OX=3702 GN=CUT1 PE=1 SV=1
Unigene0000716	1715	1635	163	sp|Q9C6L5|KCS5_ARATH	492	1	492	74.8	492	123	1	770.4	1.5e-221	sp|Q9C6L5|KCS5_ARATH 3-ketoacyl-CoA synthase 5 OS=Arabidopsis thaliana OX=3702 GN=KCS5 PE=2 SV=1
Unigene0000716	1715	1644	181	sp|Q9LN49|KCS4_ARATH	516	26	514	63.4	489	178	1	648.7	6.4e-185	sp|Q9LN49|KCS4_ARATH 3-ketoacyl-CoA synthase 4 OS=Arabidopsis thaliana OX=3702 GN=KCS4 PE=2 SV=1
Unigene0000716	1715	1641	181	sp|Q9SIX1|KCS9_ARATH	512	23	510	62.3	488	183	1	628.6	6.8e-179	sp|Q9SIX1|KCS9_ARATH 3-ketoacyl-CoA synthase 9 OS=Arabidopsis thaliana OX=3702 GN=KCS9 PE=2 SV=1
Unigene0000716	1715	1674	172	sp|O48780|KCS11_ARATH	509	4	506	57.9	503	210	2	584.3	1.5e-165	sp|O48780|KCS11_ARATH 3-ketoacyl-CoA synthase 11 OS=Arabidopsis thaliana OX=3702 GN=KCS11 PE=1 SV=1
Unigene0000716	1715	1635	172	sp|Q9FG87|KCS20_ARATH	529	28	523	59.7	496	192	8	578.6	8.1e-164	sp|Q9FG87|KCS20_ARATH 3-ketoacyl-CoA synthase 20 OS=Arabidopsis thaliana OX=3702 GN=KCS20 PE=2 SV=1
Unigene0000716	1715	1602	181	sp|O65677|KCS17_ARATH	487	15	485	59.5	476	186	7	577.4	1.8e-163	sp|O65677|KCS17_ARATH 3-ketoacyl-CoA synthase 17 OS=Arabidopsis thaliana OX=3702 GN=KCS17 PE=1 SV=1
Unigene0000716	1715	1644	178	sp|Q5XEP9|KCS2_ARATH	528	19	516	58.3	499	197	11	560.1	3.0e-158	sp|Q5XEP9|KCS2_ARATH 3-ketoacyl-CoA synthase 2 OS=Arabidopsis thaliana OX=3702 GN=KCS2 PE=2 SV=2
Unigene0000716	1715	1641	181	sp|Q9MAM3|KCS1_ARATH	528	32	526	55.9	497	207	12	535.4	7.9e-151	sp|Q9MAM3|KCS1_ARATH 3-ketoacyl-CoA synthase 1 OS=Arabidopsis thaliana OX=3702 GN=KCS1 PE=1 SV=1
Unigene0000716	1715	1608	181	sp|Q9SYZ0|KCS16_ARATH	493	5	487	52.6	483	222	7	519.6	4.5e-146	sp|Q9SYZ0|KCS16_ARATH 3-ketoacyl-CoA synthase 16 OS=Arabidopsis thaliana OX=3702 GN=KCS16 PE=2 SV=1
Unigene0000716	1715	1641	181	sp|Q570B4|KCS10_ARATH	550	37	550	51.4	518	217	35	514.6	1.4e-144	sp|Q570B4|KCS10_ARATH 3-ketoacyl-CoA synthase 10 OS=Arabidopsis thaliana OX=3702 GN=FDH PE=1 SV=2
Unigene0000716	1715	1566	181	sp|Q4V3C9|KCS8_ARATH	481	8	479	52.5	474	211	14	503.1	4.3e-141	sp|Q4V3C9|KCS8_ARATH 3-ketoacyl-CoA synthase 8 OS=Arabidopsis thaliana OX=3702 GN=KCS8 PE=2 SV=1
Unigene0000716	1715	1599	181	sp|Q38860|KCS18_ARATH	506	6	490	51.5	485	223	12	495.7	6.9e-139	sp|Q38860|KCS18_ARATH 3-ketoacyl-CoA synthase 18 OS=Arabidopsis thaliana OX=3702 GN=FAE1 PE=1 SV=1
Unigene0000716	1715	1554	181	sp|Q9ZUZ0|KCS13_ARATH	466	12	465	51.6	465	207	18	482.3	7.9e-135	sp|Q9ZUZ0|KCS13_ARATH 3-ketoacyl-CoA synthase 13 OS=Arabidopsis thaliana OX=3702 GN=HIC PE=2 SV=1
Unigene0000716	1715	1491	181	sp|Q9SS39|KCS14_ARATH	459	15	458	50.7	452	200	23	463	5.0e-129	sp|Q9SS39|KCS14_ARATH Probable 3-ketoacyl-CoA synthase 14 OS=Arabidopsis thaliana OX=3702 GN=KCS14 PE=2 SV=1
Unigene0000716	1715	1431	163	sp|Q9FH27|KCS21_ARATH	464	35	461	51.3	427	204	4	456.4	4.7e-127	sp|Q9FH27|KCS21_ARATH Probable 3-ketoacyl-CoA synthase 21 OS=Arabidopsis thaliana OX=3702 GN=KCS21 PE=2 SV=1
Unigene0000716	1715	1410	172	sp|Q7XEM4|KCS20_ORYSJ	523	93	511	55.6	419	180	6	454.9	1.4e-126	sp|Q7XEM4|KCS20_ORYSJ Probable 3-ketoacyl-CoA synthase 20 OS=Oryza sativa subsp. japonica OX=39947 GN=KCS20 PE=1 SV=1
Unigene0000716	1715	1452	187	sp|Q9C992|KCS7_ARATH	460	25	446	49.6	423	211	2	443.4	4.1e-123	sp|Q9C992|KCS7_ARATH 3-ketoacyl-CoA synthase 7 OS=Arabidopsis thaliana OX=3702 GN=KCS7 PE=2 SV=1
Unigene0000716	1715	1668	214	sp|Q9SUY9|KCS15_ARATH	451	2	449	42.1	497	227	61	372.9	6.8e-102	sp|Q9SUY9|KCS15_ARATH 3-ketoacyl-CoA synthase 15 OS=Arabidopsis thaliana OX=3702 GN=KCS15 PE=2 SV=1
Unigene0000716	1715	1449	190	sp|Q9SIB2|KCS12_ARATH	476	10	446	40.4	438	242	19	320.1	5.2e-86	sp|Q9SIB2|KCS12_ARATH 3-ketoacyl-CoA synthase 12 OS=Arabidopsis thaliana OX=3702 GN=KCS12 PE=2 SV=1
Unigene0000717	1752	1702	221	sp|Q9XF43|KCS6_ARATH	497	5	497	73.5	494	130	1	757.3	1.3e-217	sp|Q9XF43|KCS6_ARATH 3-ketoacyl-CoA synthase 6 OS=Arabidopsis thaliana OX=3702 GN=CUT1 PE=1 SV=1
Unigene0000717	1752	1699	221	sp|Q9C6L5|KCS5_ARATH	492	1	492	72.2	493	136	1	745.3	5.1e-214	sp|Q9C6L5|KCS5_ARATH 3-ketoacyl-CoA synthase 5 OS=Arabidopsis thaliana OX=3702 GN=KCS5 PE=2 SV=1
Unigene0000717	1752	1699	239	sp|Q9LN49|KCS4_ARATH	516	29	514	61.2	487	188	1	618.2	9.5e-176	sp|Q9LN49|KCS4_ARATH 3-ketoacyl-CoA synthase 4 OS=Arabidopsis thaliana OX=3702 GN=KCS4 PE=2 SV=1
Unigene0000717	1752	1717	239	sp|Q9SIX1|KCS9_ARATH	512	19	510	59.6	493	198	1	607.8	1.3e-172	sp|Q9SIX1|KCS9_ARATH 3-ketoacyl-CoA synthase 9 OS=Arabidopsis thaliana OX=3702 GN=KCS9 PE=2 SV=1
Unigene0000717	1752	1735	230	sp|O48780|KCS11_ARATH	509	6	506	56.7	503	215	3	567.4	1.9e-160	sp|O48780|KCS11_ARATH 3-ketoacyl-CoA synthase 11 OS=Arabidopsis thaliana OX=3702 GN=KCS11 PE=1 SV=1
Unigene0000717	1752	1720	230	sp|Q9FG87|KCS20_ARATH	529	21	523	57.6	505	204	10	562.8	4.7e-159	sp|Q9FG87|KCS20_ARATH 3-ketoacyl-CoA synthase 20 OS=Arabidopsis thaliana OX=3702 GN=KCS20 PE=2 SV=1
Unigene0000717	1752	1666	239	sp|O65677|KCS17_ARATH	487	15	485	57.5	482	188	17	557.8	1.5e-157	sp|O65677|KCS17_ARATH 3-ketoacyl-CoA synthase 17 OS=Arabidopsis thaliana OX=3702 GN=KCS17 PE=1 SV=1
Unigene0000717	1752	1699	236	sp|Q5XEP9|KCS2_ARATH	528	22	516	56.7	499	201	15	551.2	1.4e-155	sp|Q5XEP9|KCS2_ARATH 3-ketoacyl-CoA synthase 2 OS=Arabidopsis thaliana OX=3702 GN=KCS2 PE=2 SV=2
Unigene0000717	1752	1699	239	sp|Q9MAM3|KCS1_ARATH	528	34	526	57.1	494	204	8	539.3	5.6e-152	sp|Q9MAM3|KCS1_ARATH 3-ketoacyl-CoA synthase 1 OS=Arabidopsis thaliana OX=3702 GN=KCS1 PE=1 SV=1
Unigene0000717	1752	1699	239	sp|Q570B4|KCS10_ARATH	550	39	550	52	515	216	31	515.4	8.6e-145	sp|Q570B4|KCS10_ARATH 3-ketoacyl-CoA synthase 10 OS=Arabidopsis thaliana OX=3702 GN=FDH PE=1 SV=2
Unigene0000717	1752	1672	239	sp|Q9SYZ0|KCS16_ARATH	493	5	487	52.3	484	224	7	504.2	2.0e-141	sp|Q9SYZ0|KCS16_ARATH 3-ketoacyl-CoA synthase 16 OS=Arabidopsis thaliana OX=3702 GN=KCS16 PE=2 SV=1
Unigene0000717	1752	1630	239	sp|Q4V3C9|KCS8_ARATH	481	8	479	52.3	472	217	8	496.9	3.2e-139	sp|Q4V3C9|KCS8_ARATH 3-ketoacyl-CoA synthase 8 OS=Arabidopsis thaliana OX=3702 GN=KCS8 PE=2 SV=1
Unigene0000717	1752	1663	239	sp|Q38860|KCS18_ARATH	506	6	490	51.9	486	222	12	485.3	9.6e-136	sp|Q38860|KCS18_ARATH 3-ketoacyl-CoA synthase 18 OS=Arabidopsis thaliana OX=3702 GN=FAE1 PE=1 SV=1
Unigene0000717	1752	1558	239	sp|Q9ZUZ0|KCS13_ARATH	466	13	465	52.3	453	203	13	483.8	2.8e-135	sp|Q9ZUZ0|KCS13_ARATH 3-ketoacyl-CoA synthase 13 OS=Arabidopsis thaliana OX=3702 GN=HIC PE=2 SV=1
Unigene0000717	1752	1519	230	sp|Q7XEM4|KCS20_ORYSJ	523	79	511	55.9	435	185	7	465.3	1.0e-129	sp|Q7XEM4|KCS20_ORYSJ Probable 3-ketoacyl-CoA synthase 20 OS=Oryza sativa subsp. japonica OX=39947 GN=KCS20 PE=1 SV=1
Unigene0000717	1752	1558	239	sp|Q9SS39|KCS14_ARATH	459	13	458	50.8	453	203	20	462.6	6.6e-129	sp|Q9SS39|KCS14_ARATH Probable 3-ketoacyl-CoA synthase 14 OS=Arabidopsis thaliana OX=3702 GN=KCS14 PE=2 SV=1
Unigene0000717	1752	1516	245	sp|Q9C992|KCS7_ARATH	460	22	446	50.2	426	209	3	447.6	2.2e-124	sp|Q9C992|KCS7_ARATH 3-ketoacyl-CoA synthase 7 OS=Arabidopsis thaliana OX=3702 GN=KCS7 PE=2 SV=1
Unigene0000717	1752	1492	233	sp|Q9FH27|KCS21_ARATH	464	35	457	50.8	423	205	3	444.5	1.9e-123	sp|Q9FH27|KCS21_ARATH Probable 3-ketoacyl-CoA synthase 21 OS=Arabidopsis thaliana OX=3702 GN=KCS21 PE=2 SV=1
Unigene0000717	1752	1672	272	sp|Q9SUY9|KCS15_ARATH	451	29	449	44.5	470	209	52	383.6	3.9e-105	sp|Q9SUY9|KCS15_ARATH 3-ketoacyl-CoA synthase 15 OS=Arabidopsis thaliana OX=3702 GN=KCS15 PE=2 SV=1
Unigene0000717	1752	1537	248	sp|Q9SIB2|KCS12_ARATH	476	1	446	40.8	446	248	16	314.7	2.2e-84	sp|Q9SIB2|KCS12_ARATH 3-ketoacyl-CoA synthase 12 OS=Arabidopsis thaliana OX=3702 GN=KCS12 PE=2 SV=1
Unigene0000728	6272	1413	736	sp|Q9XIP2|OTU6_ARATH	505	280	505	70.6	231	58	10	293.5	1.9e-77	sp|Q9XIP2|OTU6_ARATH OVARIAN TUMOR DOMAIN-containing deubiquitinating enzyme 6 OS=Arabidopsis thaliana OX=3702 GN=OTU6 PE=1 SV=2
Unigene0000728	6272	5333	4965	sp|Q9XIP2|OTU6_ARATH	505	129	254	61.9	126	45	3	147.1	2.2e-33	sp|Q9XIP2|OTU6_ARATH OVARIAN TUMOR DOMAIN-containing deubiquitinating enzyme 6 OS=Arabidopsis thaliana OX=3702 GN=OTU6 PE=1 SV=2
Unigene0000728	6272	2322	2233	sp|Q9XIP2|OTU6_ARATH	505	253	282	86.7	30	4	0	59.3	6.1e-07	sp|Q9XIP2|OTU6_ARATH OVARIAN TUMOR DOMAIN-containing deubiquitinating enzyme 6 OS=Arabidopsis thaliana OX=3702 GN=OTU6 PE=1 SV=2
Unigene0000728	6272	1407	976	sp|Q640H3|OTU5B_XENLA	518	237	380	37.5	144	90	0	114.8	1.2e-23	sp|Q640H3|OTU5B_XENLA OTU domain-containing protein 5-B OS=Xenopus laevis OX=8355 GN=otud5-b PE=2 SV=1
Unigene0000728	6272	5252	4962	sp|Q640H3|OTU5B_XENLA	518	114	210	38.6	101	54	8	69.3	5.9e-10	sp|Q640H3|OTU5B_XENLA OTU domain-containing protein 5-B OS=Xenopus laevis OX=8355 GN=otud5-b PE=2 SV=1
Unigene0000728	6272	1407	1012	sp|Q3U2S4|OTUD5_MOUSE	566	279	410	40.2	132	79	0	114	2.1e-23	sp|Q3U2S4|OTUD5_MOUSE OTU domain-containing protein 5 OS=Mus musculus OX=10090 GN=Otud5 PE=1 SV=2
Unigene0000728	6272	5213	4962	sp|Q3U2S4|OTUD5_MOUSE	566	164	252	44.9	89	44	5	75.5	8.2e-12	sp|Q3U2S4|OTUD5_MOUSE OTU domain-containing protein 5 OS=Mus musculus OX=10090 GN=Otud5 PE=1 SV=2
Unigene0000728	6272	1407	1012	sp|Q2YDU3|OTUD5_RAT	566	279	410	40.2	132	79	0	114	2.1e-23	sp|Q2YDU3|OTUD5_RAT OTU domain-containing protein 5 OS=Rattus norvegicus OX=10116 GN=Otud5 PE=1 SV=2
Unigene0000728	6272	5213	4962	sp|Q2YDU3|OTUD5_RAT	566	164	252	44.9	89	44	5	75.5	8.2e-12	sp|Q2YDU3|OTUD5_RAT OTU domain-containing protein 5 OS=Rattus norvegicus OX=10116 GN=Otud5 PE=1 SV=2
Unigene0000728	6272	1407	976	sp|Q7ZX21|OTU5A_XENLA	513	232	375	37.5	144	90	0	113.2	3.5e-23	sp|Q7ZX21|OTU5A_XENLA OTU domain-containing protein 5-A OS=Xenopus laevis OX=8355 GN=otud5-a PE=2 SV=1
Unigene0000728	6272	5252	4962	sp|Q7ZX21|OTU5A_XENLA	513	109	205	38.6	101	54	8	66.2	5.0e-09	sp|Q7ZX21|OTU5A_XENLA OTU domain-containing protein 5-A OS=Xenopus laevis OX=8355 GN=otud5-a PE=2 SV=1
Unigene0000728	6272	1407	976	sp|Q6GL44|OTUD5_XENTR	518	237	380	37.5	144	90	0	113.2	3.5e-23	sp|Q6GL44|OTUD5_XENTR OTU domain-containing protein 5 OS=Xenopus tropicalis OX=8364 GN=otud5 PE=2 SV=1
Unigene0000728	6272	5279	4962	sp|Q6GL44|OTUD5_XENTR	518	108	210	40	110	55	11	69.7	4.5e-10	sp|Q6GL44|OTUD5_XENTR OTU domain-containing protein 5 OS=Xenopus tropicalis OX=8364 GN=otud5 PE=2 SV=1
Unigene0000728	6272	5192	4962	sp|Q08BW0|OTU5A_DANRE	560	170	250	48.1	81	38	4	77.8	1.6e-12	sp|Q08BW0|OTU5A_DANRE OTU domain-containing protein 5-A OS=Danio rerio OX=7955 GN=otud5a PE=2 SV=1
Unigene0000728	6272	5210	4962	sp|Q96G74|OTUD5_HUMAN	571	165	252	45.5	88	43	5	75.5	8.2e-12	sp|Q96G74|OTUD5_HUMAN OTU domain-containing protein 5 OS=Homo sapiens OX=9606 GN=OTUD5 PE=1 SV=1
Unigene0000733	1106	955	2	sp|Q10NX8|BGAL6_ORYSJ	858	18	334	78.9	318	66	1	565.5	4.6e-160	sp|Q10NX8|BGAL6_ORYSJ Beta-galactosidase 6 OS=Oryza sativa subsp. japonica OX=39947 GN=Os03g0255100 PE=1 SV=2
Unigene0000733	1106	925	2	sp|Q9SCV4|BGAL8_ARATH	852	27	333	81.8	308	55	1	564.7	7.8e-160	sp|Q9SCV4|BGAL8_ARATH Beta-galactosidase 8 OS=Arabidopsis thaliana OX=3702 GN=BGAL8 PE=2 SV=2
Unigene0000733	1106	967	2	sp|P45582|BGAL_ASPOF	832	1	328	68.7	329	95	8	506.5	2.5e-142	sp|P45582|BGAL_ASPOF Beta-galactosidase OS=Asparagus officinalis OX=4686 PE=2 SV=1
Unigene0000733	1106	910	2	sp|Q6Z6K4|BGAL4_ORYSJ	729	38	339	72.6	303	82	1	504.6	9.6e-142	sp|Q6Z6K4|BGAL4_ORYSJ Beta-galactosidase 4 OS=Oryza sativa subsp. japonica OX=39947 GN=Os02g0219200 PE=2 SV=1
Unigene0000733	1106	910	2	sp|A2X2H7|BGAL4_ORYSI	729	38	339	72.6	303	82	1	504.2	1.3e-141	sp|A2X2H7|BGAL4_ORYSI Beta-galactosidase 4 OS=Oryza sativa subsp. indica OX=39946 GN=OsI_006270 PE=3 SV=1
Unigene0000733	1106	934	2	sp|Q9SCW1|BGAL1_ARATH	847	26	335	71.1	311	89	1	503.4	2.1e-141	sp|Q9SCW1|BGAL1_ARATH Beta-galactosidase 1 OS=Arabidopsis thaliana OX=3702 GN=BGAL1 PE=2 SV=1
Unigene0000733	1106	940	2	sp|Q5Z7L0|BGAL9_ORYSJ	715	9	323	71.5	316	86	4	502.3	4.8e-141	sp|Q5Z7L0|BGAL9_ORYSJ Beta-galactosidase 9 OS=Oryza sativa subsp. japonica OX=39947 GN=Os06g0573600 PE=2 SV=1
Unigene0000733	1106	967	2	sp|P48980|BGAL_SOLLC	835	5	325	68.3	322	101	1	498.4	6.9e-140	sp|P48980|BGAL_SOLLC Beta-galactosidase OS=Solanum lycopersicum OX=4081 PE=1 SV=1
Unigene0000733	1106	952	2	sp|Q10RB4|BGAL5_ORYSJ	841	14	328	68.5	317	98	2	493.4	2.2e-138	sp|Q10RB4|BGAL5_ORYSJ Beta-galactosidase 5 OS=Oryza sativa subsp. japonica OX=39947 GN=Os03g0165400 PE=2 SV=1
Unigene0000733	1106	910	2	sp|Q9SCV9|BGAL3_ARATH	856	33	334	70	303	90	1	490.3	1.9e-137	sp|Q9SCV9|BGAL3_ARATH Beta-galactosidase 3 OS=Arabidopsis thaliana OX=3702 GN=BGAL3 PE=2 SV=1
Unigene0000733	1106	910	2	sp|Q8W0A1|BGAL2_ORYSJ	827	26	327	69.3	303	92	1	488	9.3e-137	sp|Q8W0A1|BGAL2_ORYSJ Beta-galactosidase 2 OS=Oryza sativa subsp. japonica OX=39947 GN=Os01g0580200 PE=2 SV=1
Unigene0000733	1106	973	2	sp|P48981|BGAL_MALDO	731	5	327	65.7	324	110	1	485	7.9e-136	sp|P48981|BGAL_MALDO Beta-galactosidase OS=Malus domestica OX=3750 PE=1 SV=1
Unigene0000733	1106	916	2	sp|Q9MAJ7|BGAL5_ARATH	732	29	332	69.8	305	91	1	483.8	1.8e-135	sp|Q9MAJ7|BGAL5_ARATH Beta-galactosidase 5 OS=Arabidopsis thaliana OX=3702 GN=BGAL5 PE=2 SV=1
Unigene0000733	1106	964	2	sp|P49676|BGAL_BRAOL	828	5	328	67.1	325	102	5	482.6	3.9e-135	sp|P49676|BGAL_BRAOL Beta-galactosidase OS=Brassica oleracea OX=3712 PE=2 SV=1
Unigene0000733	1106	910	2	sp|Q9SCV0|BGA12_ARATH	728	29	329	70	303	89	2	481.5	8.7e-135	sp|Q9SCV0|BGA12_ARATH Beta-galactosidase 12 OS=Arabidopsis thaliana OX=3702 GN=BGAL12 PE=2 SV=1
Unigene0000733	1106	952	2	sp|Q9LFA6|BGAL2_ARATH	727	11	329	67.3	321	99	6	478.4	7.4e-134	sp|Q9LFA6|BGAL2_ARATH Beta-galactosidase 2 OS=Arabidopsis thaliana OX=3702 GN=BGAL2 PE=2 SV=2
Unigene0000733	1106	973	2	sp|Q9SCV3|BGAL9_ARATH	887	10	339	64.4	331	110	8	478.4	7.4e-134	sp|Q9SCV3|BGAL9_ARATH Beta-galactosidase 9 OS=Arabidopsis thaliana OX=3702 GN=BGAL9 PE=2 SV=1
Unigene0000733	1106	991	2	sp|Q9SCV5|BGAL7_ARATH	826	1	329	65.8	330	112	1	477.6	1.3e-133	sp|Q9SCV5|BGAL7_ARATH Beta-galactosidase 7 OS=Arabidopsis thaliana OX=3702 GN=BGAL7 PE=2 SV=2
Unigene0000733	1106	916	2	sp|Q5N8X6|BGAL3_ORYSJ	851	36	339	68.9	305	94	1	476.1	3.7e-133	sp|Q5N8X6|BGAL3_ORYSJ Beta-galactosidase 3 OS=Oryza sativa subsp. japonica OX=39947 GN=Os01g0875500 PE=3 SV=1
Unigene0000733	1106	916	2	sp|Q9SCV8|BGAL4_ARATH	724	27	329	67.9	305	96	2	469.9	2.6e-131	sp|Q9SCV8|BGAL4_ARATH Beta-galactosidase 4 OS=Arabidopsis thaliana OX=3702 GN=BGAL4 PE=1 SV=1
Unigene0000734	2194	60	2024	sp|O80742|PUB19_ARATH	686	1	663	37.8	667	399	16	397.1	4.3e-109	sp|O80742|PUB19_ARATH U-box domain-containing protein 19 OS=Arabidopsis thaliana OX=3702 GN=PUB19 PE=2 SV=1
Unigene0000734	2194	60	2024	sp|Q9XIJ5|PUB18_ARATH	697	1	674	36.8	677	403	25	382.9	8.4e-105	sp|Q9XIJ5|PUB18_ARATH U-box domain-containing protein 18 OS=Arabidopsis thaliana OX=3702 GN=PUB18 PE=1 SV=1
Unigene0000734	2194	123	2021	sp|Q9LZW3|PUB16_ARATH	674	25	643	28.4	645	424	38	251.1	3.8e-65	sp|Q9LZW3|PUB16_ARATH U-box domain-containing protein 16 OS=Arabidopsis thaliana OX=3702 GN=PUB16 PE=2 SV=1
Unigene0000734	2194	129	2009	sp|Q9C7R6|PUB17_ARATH	729	27	681	30	661	423	40	243.8	6.1e-63	sp|Q9C7R6|PUB17_ARATH U-box domain-containing protein 17 OS=Arabidopsis thaliana OX=3702 GN=PUB17 PE=2 SV=1
Unigene0000734	2194	123	2012	sp|E4NKF8|PUB1_MEDTR	694	12	680	26.3	674	448	49	228.4	2.6e-58	sp|E4NKF8|PUB1_MEDTR U-box domain-containing protein 1 OS=Medicago truncatula OX=3880 GN=PUB1 PE=1 SV=1
Unigene0000734	2194	87	2012	sp|Q6EUK7|PUB04_ORYSJ	728	23	675	27.8	663	448	31	207.6	4.8e-52	sp|Q6EUK7|PUB04_ORYSJ U-box domain-containing protein 4 OS=Oryza sativa subsp. japonica OX=39947 GN=PUB4 PE=2 SV=1
Unigene0000734	2194	132	1385	sp|Q8VZ40|PUB14_ARATH	632	8	415	32.4	423	266	20	185.3	2.6e-45	sp|Q8VZ40|PUB14_ARATH U-box domain-containing protein 14 OS=Arabidopsis thaliana OX=3702 GN=PUB14 PE=1 SV=1
Unigene0000734	2194	210	1385	sp|A2ZLU6|SL11_ORYSI	694	49	437	33	394	257	7	179.1	1.8e-43	sp|A2ZLU6|SL11_ORYSI Protein spotted leaf 11 OS=Oryza sativa subsp. indica OX=39946 GN=SPL11 PE=1 SV=2
Unigene0000734	2194	210	1385	sp|Q0IMG9|SL11_ORYSJ	694	49	437	33	394	257	7	179.1	1.8e-43	sp|Q0IMG9|SL11_ORYSJ E3 ubiquitin-protein ligase SPL11 OS=Oryza sativa subsp. japonica OX=39947 GN=SPL11 PE=1 SV=2
Unigene0000734	2194	165	1385	sp|Q5VRH9|PUB12_ORYSJ	611	5	393	31.2	407	262	18	168.3	3.2e-40	sp|Q5VRH9|PUB12_ORYSJ U-box domain-containing protein 12 OS=Oryza sativa subsp. japonica OX=39947 GN=PUB12 PE=1 SV=1
Unigene0000734	2194	153	1385	sp|Q9SNC6|PUB13_ARATH	660	11	422	28.7	422	280	21	160.6	6.8e-38	sp|Q9SNC6|PUB13_ARATH U-box domain-containing protein 13 OS=Arabidopsis thaliana OX=3702 GN=PUB13 PE=1 SV=1
Unigene0000734	2194	141	1541	sp|Q9ZV31|PUB12_ARATH	654	12	478	30.6	484	302	34	158.3	3.4e-37	sp|Q9ZV31|PUB12_ARATH U-box domain-containing protein 12 OS=Arabidopsis thaliana OX=3702 GN=PUB12 PE=2 SV=1
Unigene0000734	2194	153	1451	sp|Q9C9A6|PUB10_ARATH	628	10	434	29.5	465	256	72	132.1	2.6e-29	sp|Q9C9A6|PUB10_ARATH U-box domain-containing protein 10 OS=Arabidopsis thaliana OX=3702 GN=PUB10 PE=2 SV=1
Unigene0000734	2194	891	1799	sp|O81902|PUB8_ARATH	374	6	297	29.6	304	201	13	123.2	1.2e-26	sp|O81902|PUB8_ARATH U-box domain-containing protein 8 OS=Arabidopsis thaliana OX=3702 GN=PUB8 PE=2 SV=1
Unigene0000734	2194	129	1385	sp|Q8GUG9|PUB11_ARATH	612	6	401	28.6	437	253	59	122.5	2.0e-26	sp|Q8GUG9|PUB11_ARATH U-box domain-containing protein 11 OS=Arabidopsis thaliana OX=3702 GN=PUB11 PE=2 SV=2
Unigene0000734	2194	357	1385	sp|Q681N2|PUB15_ARATH	660	120	449	28	346	230	19	118.6	2.9e-25	sp|Q681N2|PUB15_ARATH U-box domain-containing protein 15 OS=Arabidopsis thaliana OX=3702 GN=PUB15 PE=2 SV=2
Unigene0000734	2194	891	1544	sp|Q9SRT0|PUB9_ARATH	460	75	297	32.6	224	144	7	117.5	6.6e-25	sp|Q9SRT0|PUB9_ARATH U-box domain-containing protein 9 OS=Arabidopsis thaliana OX=3702 GN=PUB9 PE=1 SV=1
Unigene0000734	2194	891	2012	sp|Q5PNY6|PUB21_ARATH	435	32	408	27.2	386	260	21	106.3	1.5e-21	sp|Q5PNY6|PUB21_ARATH U-box domain-containing protein 21 OS=Arabidopsis thaliana OX=3702 GN=PUB21 PE=2 SV=1
Unigene0000734	2194	891	1796	sp|Q9CAG5|PUB7_ARATH	782	273	634	28.4	366	194	68	106.3	1.5e-21	sp|Q9CAG5|PUB7_ARATH U-box domain-containing protein 7 OS=Arabidopsis thaliana OX=3702 GN=PUB7 PE=2 SV=1
Unigene0000734	2194	891	2042	sp|Q9C7G1|PUB45_ARATH	768	280	709	26.4	443	254	72	102.4	2.2e-20	sp|Q9C7G1|PUB45_ARATH U-box domain-containing protein 45 OS=Arabidopsis thaliana OX=3702 GN=PUB45 PE=1 SV=1
Unigene0000735	565	557	6	sp|P04146|COPIA_DROME	1409	476	665	36.3	190	115	6	127.9	1.2e-28	sp|P04146|COPIA_DROME Copia protein OS=Drosophila melanogaster OX=7227 GN=GIP PE=1 SV=3
Unigene0000736	1560	1531	149	sp|Q84JF5|PTA14_ARATH	483	28	483	66.7	462	147	7	639	4.6e-182	sp|Q84JF5|PTA14_ARATH Protein PLASTID TRANSCRIPTIONALLY ACTIVE 14 OS=Arabidopsis thaliana OX=3702 GN=PTAC14 PE=1 SV=1
Unigene0000744	1279	1279	65	sp|P55059|PDI_HUMIN	505	75	479	70.4	405	120	0	576.6	2.3e-163	sp|P55059|PDI_HUMIN Protein disulfide-isomerase OS=Humicola insolens OX=34413 PE=1 SV=1
Unigene0000744	1279	1276	41	sp|Q12730|PDI_ASPNG	515	80	504	59.8	425	158	13	519.2	4.4e-146	sp|Q12730|PDI_ASPNG Protein disulfide-isomerase OS=Aspergillus niger OX=5061 GN=pdiA PE=2 SV=1
Unigene0000744	1279	1279	80	sp|D4B2L8|PDI_ARTBC	523	84	483	61.6	401	152	2	517.7	1.3e-145	sp|D4B2L8|PDI_ARTBC Protein disulfide-isomerase OS=Arthroderma benhamiae (strain ATCC MYA-4681 / CBS 112371) OX=663331 GN=ARB_02626 PE=3 SV=1
Unigene0000744	1279	1276	35	sp|Q00248|PDI_ASPOR	515	84	506	60.1	426	155	15	508.1	1.0e-142	sp|Q00248|PDI_ASPOR Protein disulfide-isomerase OS=Aspergillus oryzae (strain ATCC 42149 / RIB 40) OX=510516 GN=pdiA PE=3 SV=1
Unigene0000744	1279	1138	194	sp|Q00002|PDI_ALTAL	436	4	317	65.1	315	109	1	401	1.7e-110	sp|Q00002|PDI_ALTAL Protein disulfide-isomerase (Fragment) OS=Alternaria alternata OX=5599 PE=1 SV=2
Unigene0000744	1279	1276	41	sp|Q10057|PDI1_SCHPO	492	77	483	45	416	216	13	350.5	2.7e-95	sp|Q10057|PDI1_SCHPO Putative protein disulfide-isomerase C1F5.02 OS=Schizosaccharomyces pombe (strain 972 / ATCC 24843) OX=284812 GN=SPAC1F5.02 PE=3 SV=1
Unigene0000744	1279	1279	92	sp|Q54EN4|PDI2_DICDI	513	96	491	37.2	400	243	8	287	3.6e-76	sp|Q54EN4|PDI2_DICDI Protein disulfide-isomerase 2 OS=Dictyostelium discoideum OX=44689 GN=pdi2 PE=3 SV=1
Unigene0000744	1279	1279	5	sp|P17967|PDI_YEAST	522	86	514	37.8	439	249	24	263.8	3.3e-69	sp|P17967|PDI_YEAST Protein disulfide-isomerase OS=Saccharomyces cerevisiae (strain ATCC 204508 / S288c) OX=559292 GN=PDI1 PE=1 SV=2
Unigene0000744	1279	1279	107	sp|P09102|PDIA1_CHICK	515	85	480	33	406	247	25	218.4	1.6e-55	sp|P09102|PDIA1_CHICK Protein disulfide-isomerase OS=Gallus gallus OX=9031 GN=P4HB PE=1 SV=3
Unigene0000744	1279	1279	119	sp|P30101|PDIA3_HUMAN	505	81	481	34.3	405	244	22	218.4	1.6e-55	sp|P30101|PDIA3_HUMAN Protein disulfide-isomerase A3 OS=Homo sapiens OX=9606 GN=PDIA3 PE=1 SV=4
Unigene0000744	1279	1279	119	sp|Q5RDG4|PDIA3_PONAB	505	81	481	34.3	405	244	22	218.4	1.6e-55	sp|Q5RDG4|PDIA3_PONAB Protein disulfide-isomerase A3 OS=Pongo abelii OX=9601 GN=PDIA3 PE=2 SV=1
Unigene0000744	1279	1279	119	sp|Q4VIT4|PDIA3_CHLAE	505	81	481	34.3	405	244	22	216.9	4.6e-55	sp|Q4VIT4|PDIA3_CHLAE Protein disulfide-isomerase A3 OS=Chlorocebus aethiops OX=9534 GN=PDIA3 PE=1 SV=1
Unigene0000744	1279	1279	47	sp|P29828|PDI_MEDSA	512	89	508	37	440	228	49	216.1	7.9e-55	sp|P29828|PDI_MEDSA Protein disulfide-isomerase OS=Medicago sativa OX=3879 GN=PDI PE=2 SV=1
Unigene0000744	1279	1279	113	sp|Q9XI01|PDI11_ARATH	501	86	480	36.8	405	230	26	215.7	1.0e-54	sp|Q9XI01|PDI11_ARATH Protein disulfide isomerase-like 1-1 OS=Arabidopsis thaliana OX=3702 GN=PDIL1-1 PE=1 SV=1
Unigene0000744	1279	1279	119	sp|P27773|PDIA3_MOUSE	505	81	481	34.3	405	244	22	215.7	1.0e-54	sp|P27773|PDIA3_MOUSE Protein disulfide-isomerase A3 OS=Mus musculus OX=10090 GN=Pdia3 PE=1 SV=2
Unigene0000744	1279	1279	50	sp|P54399|PDI_DROME	496	83	489	33.3	418	260	19	214.2	3.0e-54	sp|P54399|PDI_DROME Protein disulfide-isomerase OS=Drosophila melanogaster OX=7227 GN=Pdi PE=2 SV=1
Unigene0000744	1279	1279	107	sp|Q5R5B6|PDIA1_PONAB	508	80	475	32	406	251	25	213.8	3.9e-54	sp|Q5R5B6|PDIA1_PONAB Protein disulfide-isomerase OS=Pongo abelii OX=9601 GN=P4HB PE=2 SV=1
Unigene0000744	1279	1279	107	sp|P07237|PDIA1_HUMAN	508	80	475	32	406	251	25	213.4	5.1e-54	sp|P07237|PDIA1_HUMAN Protein disulfide-isomerase OS=Homo sapiens OX=9606 GN=P4HB PE=1 SV=3
Unigene0000744	1279	1276	110	sp|P34329|PDIA4_CAEEL	618	204	608	34.6	408	245	22	213	6.7e-54	sp|P34329|PDIA4_CAEEL Probable protein disulfide-isomerase A4 OS=Caenorhabditis elegans OX=6239 GN=C14B9.2 PE=3 SV=2
Unigene0000744	1279	1276	53	sp|Q17770|PDI2_CAEEL	493	80	488	33.4	416	262	15	212.2	1.1e-53	sp|Q17770|PDI2_CAEEL Protein disulfide-isomerase 2 OS=Caenorhabditis elegans OX=6239 GN=pdi-2 PE=1 SV=1
Unigene0000746	797	246	434	sp|Q08422|TMC1_YEAST	150	85	147	55.6	63	28	0	88.6	1.2e-16	sp|Q08422|TMC1_YEAST AN1-type zinc finger protein TMC1 OS=Saccharomyces cerevisiae (strain ATCC 204508 / S288c) OX=559292 GN=TMC1 PE=1 SV=1
Unigene0000747	488	113	364	sp|B5FVG3|ATPJ_YARLI	90	2	82	48.8	84	40	3	75.1	8.3e-13	sp|B5FVG3|ATPJ_YARLI ATP synthase subunit e, mitochondrial OS=Yarrowia lipolytica (strain CLIB 122 / E 150) OX=284591 GN=TIM11 PE=1 SV=1
Unigene0000747	488	122	355	sp|P81449|ATPJ_YEAST	96	4	81	41	78	46	0	54.7	1.2e-06	sp|P81449|ATPJ_YEAST ATP synthase subunit e, mitochondrial OS=Saccharomyces cerevisiae (strain ATCC 204508 / S288c) OX=559292 GN=TIM11 PE=1 SV=2
Unigene0000748	780	655	182	sp|F4JIJ7|BH162_ARATH	190	16	186	33.9	174	96	19	93.6	3.6e-18	sp|F4JIJ7|BH162_ARATH Transcription factor bHLH162 OS=Arabidopsis thaliana OX=3702 GN=BHLH162 PE=1 SV=1
Unigene0000752	2329	143	2104	sp|Q8GUU3|CPS3B_ARATH	613	1	610	59	654	224	44	767.3	1.7e-220	sp|Q8GUU3|CPS3B_ARATH Cleavage and polyadenylation specificity factor subunit 3-II OS=Arabidopsis thaliana OX=3702 GN=CPSF73-II PE=1 SV=2
Unigene0000752	2329	143	1507	sp|Q54YL3|INT11_DICDI	744	1	466	57.9	466	185	11	575.1	1.2e-162	sp|Q54YL3|INT11_DICDI Integrator complex subunit 11 homolog OS=Dictyostelium discoideum OX=44689 GN=ints11 PE=3 SV=1
Unigene0000752	2329	164	2107	sp|Q503E1|INT11_DANRE	598	9	594	46.5	648	285	62	562.4	8.2e-159	sp|Q503E1|INT11_DANRE Integrator complex subunit 11 OS=Danio rerio OX=7955 GN=cpsf3l PE=2 SV=1
Unigene0000752	2329	164	1744	sp|Q5ZIH0|INT11_CHICK	600	9	510	52.2	527	227	25	554.7	1.7e-156	sp|Q5ZIH0|INT11_CHICK Integrator complex subunit 11 OS=Gallus gallus OX=9031 GN=INTS11 PE=2 SV=1
Unigene0000752	2329	164	2104	sp|Q9CWS4|INT11_MOUSE	600	9	592	45.7	647	288	63	553.1	5.0e-156	sp|Q9CWS4|INT11_MOUSE Integrator complex subunit 11 OS=Mus musculus OX=10090 GN=Ints11 PE=1 SV=1
Unigene0000752	2329	164	2104	sp|Q3MHC2|INT11_RAT	600	9	592	46.1	647	286	63	553.1	5.0e-156	sp|Q3MHC2|INT11_RAT Integrator complex subunit 11 OS=Rattus norvegicus OX=10116 GN=Ints11 PE=2 SV=1
Unigene0000752	2329	164	1744	sp|Q5TA45|INT11_HUMAN	600	9	510	52.4	527	226	25	552.7	6.5e-156	sp|Q5TA45|INT11_HUMAN Integrator complex subunit 11 OS=Homo sapiens OX=9606 GN=INTS11 PE=1 SV=2
Unigene0000752	2329	164	1744	sp|Q5NVE6|INT11_PONAB	600	9	510	52.4	527	226	25	552.7	6.5e-156	sp|Q5NVE6|INT11_PONAB Integrator complex subunit 11 OS=Pongo abelii OX=9601 GN=INTS11 PE=2 SV=2
Unigene0000752	2329	164	2107	sp|Q2YDM2|INT11_BOVIN	599	9	593	45.4	648	291	63	550.8	2.5e-155	sp|Q2YDM2|INT11_BOVIN Integrator complex subunit 11 OS=Bos taurus OX=9913 GN=INTS11 PE=2 SV=2
Unigene0000752	2329	164	1744	sp|Q9VAH9|INT11_DROME	597	9	512	51.6	529	229	27	545.8	7.9e-154	sp|Q9VAH9|INT11_DROME Integrator complex subunit 11 OS=Drosophila melanogaster OX=7227 GN=IntS11 PE=1 SV=1
Unigene0000752	2329	164	1690	sp|Q9C952|CPSF3_ARATH	693	27	518	34.6	512	312	23	292.7	1.2e-77	sp|Q9C952|CPSF3_ARATH Cleavage and polyadenylation specificity factor subunit 3-I OS=Arabidopsis thaliana OX=3702 GN=CPSF73-I PE=1 SV=1
Unigene0000752	2329	164	1480	sp|Q9QXK7|CPSF3_MOUSE	684	17	456	35.3	448	273	17	287.7	3.9e-76	sp|Q9QXK7|CPSF3_MOUSE Cleavage and polyadenylation specificity factor subunit 3 OS=Mus musculus OX=10090 GN=Cpsf3 PE=1 SV=2
Unigene0000752	2329	164	1480	sp|P79101|CPSF3_BOVIN	684	17	456	35	448	274	17	286.6	8.7e-76	sp|P79101|CPSF3_BOVIN Cleavage and polyadenylation specificity factor subunit 3 OS=Bos taurus OX=9913 GN=CPSF3 PE=1 SV=1
Unigene0000752	2329	164	1480	sp|Q9UKF6|CPSF3_HUMAN	684	17	456	35	448	274	17	286.6	8.7e-76	sp|Q9UKF6|CPSF3_HUMAN Cleavage and polyadenylation specificity factor subunit 3 OS=Homo sapiens OX=9606 GN=CPSF3 PE=1 SV=1
Unigene0000752	2329	164	1576	sp|Q9VE51|CPSF3_DROME	684	23	481	33.8	480	288	30	274.6	3.4e-72	sp|Q9VE51|CPSF3_DROME Cleavage and polyadenylation specificity factor 73 OS=Drosophila melanogaster OX=7227 GN=Cpsf73 PE=1 SV=2
Unigene0000752	2329	149	1480	sp|Q86A79|CPSF3_DICDI	774	36	478	32.2	454	287	21	272.7	1.3e-71	sp|Q86A79|CPSF3_DICDI Cleavage and polyadenylation specificity factor subunit 3 OS=Dictyostelium discoideum OX=44689 GN=cpsf3 PE=3 SV=1
Unigene0000752	2329	131	1483	sp|O13794|YSH1_SCHPO	757	13	463	32.3	462	291	22	260.8	5.1e-68	sp|O13794|YSH1_SCHPO Endoribonuclease ysh1 OS=Schizosaccharomyces pombe (strain 972 / ATCC 24843) OX=284812 GN=ysh1 PE=3 SV=2
Unigene0000752	2329	161	1516	sp|Q4PEJ3|YSH1_USTMA	880	28	489	33	470	289	26	254.6	3.7e-66	sp|Q4PEJ3|YSH1_USTMA Endoribonuclease YSH1 OS=Ustilago maydis (strain 521 / FGSC 9021) OX=237631 GN=YSH1 PE=3 SV=1
Unigene0000752	2329	164	1429	sp|Q74ZC0|YSH1_EREGS	771	16	446	31.7	441	272	29	251.1	4.0e-65	sp|Q74ZC0|YSH1_EREGS Endoribonuclease YSH1 OS=Eremothecium gossypii (strain ATCC 10895 / CBS 109.51 / FGSC 9923 / NRRL Y-1056) OX=284811 GN=YSH1 PE=3 SV=2
Unigene0000752	2329	164	1462	sp|Q6FUA5|YSH1_CANGA	771	15	463	30.3	459	284	36	246.1	1.3e-63	sp|Q6FUA5|YSH1_CANGA Endoribonuclease YSH1 OS=Candida glabrata (strain ATCC 2001 / BCRC 20586 / JCM 3761 / NBRC 0622 / NRRL Y-65 / CBS 138) OX=284593 GN=YSH1 PE=3 SV=1
Unigene0000757	507	41	352	sp|O59804|CH10_SCHPO	104	1	104	66.3	104	35	0	142.5	4.4e-33	sp|O59804|CH10_SCHPO 10 kDa heat shock protein, mitochondrial OS=Schizosaccharomyces pombe (strain 972 / ATCC 24843) OX=284812 GN=hsp10 PE=1 SV=1
Unigene0000757	507	41	346	sp|P38910|CH10_YEAST	106	1	103	63.1	103	37	1	127.9	1.1e-28	sp|P38910|CH10_YEAST 10 kDa heat shock protein, mitochondrial OS=Saccharomyces cerevisiae (strain ATCC 204508 / S288c) OX=559292 GN=HSP10 PE=1 SV=1
Unigene0000757	507	62	352	sp|P34893|CH10_ARATH	98	2	97	55.7	97	42	1	110.2	2.4e-23	sp|P34893|CH10_ARATH 10 kDa chaperonin, mitochondrial OS=Arabidopsis thaliana OX=3702 GN=CPN10 PE=1 SV=1
Unigene0000757	507	62	352	sp|Q96539|CH10_BRANA	98	2	97	53.6	97	44	1	105.5	6.0e-22	sp|Q96539|CH10_BRANA 10 kDa chaperonin OS=Brassica napus OX=3708 PE=3 SV=1
Unigene0000757	507	59	343	sp|Q9W6X3|CH10_ORYLA	99	2	96	49.5	95	48	0	95.1	8.1e-19	sp|Q9W6X3|CH10_ORYLA 10 kDa heat shock protein, mitochondrial OS=Oryzias latipes OX=8090 GN=hspe1 PE=3 SV=1
Unigene0000757	507	56	352	sp|Q5DC69|CH10_SCHJA	102	4	102	48.5	99	51	0	95.1	8.1e-19	sp|Q5DC69|CH10_SCHJA 10 kDa heat shock protein, mitochondrial OS=Schistosoma japonicum OX=6182 GN=SJCHGC01960 PE=3 SV=2
Unigene0000757	507	56	343	sp|Q64433|CH10_MOUSE	102	4	99	50	96	48	0	94	1.8e-18	sp|Q64433|CH10_MOUSE 10 kDa heat shock protein, mitochondrial OS=Mus musculus OX=10090 GN=Hspe1 PE=1 SV=2
Unigene0000757	507	56	343	sp|P26772|CH10_RAT	102	4	99	50	96	48	0	93.2	3.1e-18	sp|P26772|CH10_RAT 10 kDa heat shock protein, mitochondrial OS=Rattus norvegicus OX=10116 GN=Hspe1 PE=1 SV=3
Unigene0000757	507	56	343	sp|P61603|CH10_BOVIN	102	4	99	49	96	49	0	90.9	1.5e-17	sp|P61603|CH10_BOVIN 10 kDa heat shock protein, mitochondrial OS=Bos taurus OX=9913 GN=HSPE1 PE=3 SV=2
Unigene0000757	507	56	343	sp|P61604|CH10_HUMAN	102	4	99	49	96	49	0	90.9	1.5e-17	sp|P61604|CH10_HUMAN 10 kDa heat shock protein, mitochondrial OS=Homo sapiens OX=9606 GN=HSPE1 PE=1 SV=2
Unigene0000757	507	68	352	sp|B2JFE1|CH10_PARP8	96	2	96	44.2	95	53	0	87.8	1.3e-16	sp|B2JFE1|CH10_PARP8 Co-chaperonin GroES OS=Paraburkholderia phymatum (strain DSM 17167 / CIP 108236 / LMG 21445 / STM815) OX=391038 GN=groES PE=3 SV=1
Unigene0000757	507	68	352	sp|Q1LQS5|CH10_CUPMC	96	2	96	43.2	95	54	0	87.4	1.7e-16	sp|Q1LQS5|CH10_CUPMC Co-chaperonin GroES OS=Cupriavidus metallidurans (strain ATCC 43123 / DSM 2839 / NBRC 102507 / CH34) OX=266264 GN=groES PE=3 SV=1
Unigene0000757	507	68	352	sp|Q0KDR8|CH10_CUPNH	96	2	96	43.2	95	54	0	87.4	1.7e-16	sp|Q0KDR8|CH10_CUPNH Co-chaperonin GroES OS=Cupriavidus necator (strain ATCC 17699 / DSM 428 / KCTC 22496 / NCIMB 10442 / H16 / Stanier 337) OX=381666 GN=groES PE=3 SV=1
Unigene0000757	507	68	352	sp|Q46XW5|CH10_CUPPJ	96	2	96	43.2	95	54	0	87.4	1.7e-16	sp|Q46XW5|CH10_CUPPJ Co-chaperonin GroES OS=Cupriavidus pinatubonensis (strain JMP 134 / LMG 1197) OX=264198 GN=groES PE=3 SV=1
Unigene0000757	507	68	352	sp|B3R2Y2|CH10_CUPTR	96	2	96	43.2	95	54	0	87.4	1.7e-16	sp|B3R2Y2|CH10_CUPTR Co-chaperonin GroES OS=Cupriavidus taiwanensis (strain DSM 17343 / BCRC 17206 / CCUG 44338 / CIP 107171 / LMG 19424 / R1) OX=977880 GN=groES PE=3 SV=1
Unigene0000757	507	68	352	sp|B2T0H9|CH10_PARPJ	96	2	96	43.2	95	54	0	87.4	1.7e-16	sp|B2T0H9|CH10_PARPJ Co-chaperonin GroES OS=Paraburkholderia phytofirmans (strain DSM 17436 / LMG 22146 / PsJN) OX=398527 GN=groES PE=3 SV=1
Unigene0000757	507	68	349	sp|Q9ZFE1|CH10_BURCE	97	2	95	43.6	94	53	0	86.7	2.9e-16	sp|Q9ZFE1|CH10_BURCE Co-chaperonin GroES OS=Burkholderia cepacia OX=292 GN=groES PE=3 SV=1
Unigene0000757	507	68	349	sp|Q9ZFD9|CH10_BURVI	97	2	95	43.6	94	53	0	86.7	2.9e-16	sp|Q9ZFD9|CH10_BURVI Co-chaperonin GroES OS=Burkholderia vietnamiensis OX=60552 GN=groES PE=3 SV=1
Unigene0000757	507	71	352	sp|B9LZ36|CH10_GEODF	96	3	96	43.6	94	53	0	85.5	6.4e-16	sp|B9LZ36|CH10_GEODF Co-chaperonin GroES OS=Geotalea daltonii (strain DSM 22248 / JCM 15807 / FRC-32) OX=316067 GN=groES PE=3 SV=1
Unigene0000757	507	71	346	sp|B3DZP6|CH10_METI4	99	6	97	44.6	92	51	0	85.1	8.4e-16	sp|B3DZP6|CH10_METI4 Co-chaperonin GroES OS=Methylacidiphilum infernorum (isolate V4) OX=481448 GN=groES PE=3 SV=1
Unigene0000759	1131	138	1043	sp|P56286|IF2A_SCHPO	306	1	303	64.7	303	106	1	381.7	9.6e-105	sp|P56286|IF2A_SCHPO Eukaryotic translation initiation factor 2 subunit alpha OS=Schizosaccharomyces pombe (strain 972 / ATCC 24843) OX=284812 GN=tif211 PE=1 SV=1
Unigene0000759	1131	138	1049	sp|P20459|IF2A_YEAST	304	1	304	64.8	304	107	0	379.8	3.7e-104	sp|P20459|IF2A_YEAST Eukaryotic translation initiation factor 2 subunit alpha OS=Saccharomyces cerevisiae (strain ATCC 204508 / S288c) OX=559292 GN=SUI2 PE=1 SV=1
Unigene0000759	1131	150	1046	sp|P05198|IF2A_HUMAN	315	5	310	53.1	307	135	9	311.2	1.6e-83	sp|P05198|IF2A_HUMAN Eukaryotic translation initiation factor 2 subunit 1 OS=Homo sapiens OX=9606 GN=EIF2S1 PE=1 SV=3
Unigene0000759	1131	150	1046	sp|Q5R493|IF2A_PONAB	315	5	310	53.1	307	135	9	310.5	2.7e-83	sp|Q5R493|IF2A_PONAB Eukaryotic translation initiation factor 2 subunit 1 OS=Pongo abelii OX=9601 GN=EIF2S1 PE=2 SV=1
Unigene0000759	1131	138	1046	sp|Q6GL89|IF2A_XENTR	315	1	310	52.4	311	139	9	310.1	3.6e-83	sp|Q6GL89|IF2A_XENTR Eukaryotic translation initiation factor 2 subunit 1 OS=Xenopus tropicalis OX=8364 GN=eif2s1 PE=2 SV=1
Unigene0000759	1131	150	1046	sp|P68102|IF2A_BOVIN	315	5	310	52.8	307	136	9	309.3	6.1e-83	sp|P68102|IF2A_BOVIN Eukaryotic translation initiation factor 2 subunit 1 OS=Bos taurus OX=9913 GN=EIF2S1 PE=2 SV=2
Unigene0000759	1131	150	1046	sp|Q6ZWX6|IF2A_MOUSE	315	5	310	52.8	307	136	9	309.3	6.1e-83	sp|Q6ZWX6|IF2A_MOUSE Eukaryotic translation initiation factor 2 subunit 1 OS=Mus musculus OX=10090 GN=Eif2s1 PE=1 SV=3
Unigene0000759	1131	150	1046	sp|P20460|IF2A_PIG	315	5	310	52.8	307	136	9	309.3	6.1e-83	sp|P20460|IF2A_PIG Eukaryotic translation initiation factor 2 subunit 1 OS=Sus scrofa OX=9823 GN=EIF2S1 PE=1 SV=3
Unigene0000759	1131	150	1046	sp|P68101|IF2A_RAT	315	5	310	52.8	307	136	9	309.3	6.1e-83	sp|P68101|IF2A_RAT Eukaryotic translation initiation factor 2 subunit 1 OS=Rattus norvegicus OX=10116 GN=Eif2s1 PE=1 SV=2
Unigene0000759	1131	150	1046	sp|Q7ZTK4|IF2A_XENLA	315	5	310	52.4	307	137	9	307.4	2.3e-82	sp|Q7ZTK4|IF2A_XENLA Eukaryotic translation initiation factor 2 subunit 1 OS=Xenopus laevis OX=8355 GN=eif2s1 PE=2 SV=1
Unigene0000759	1131	138	1046	sp|Q5ZLX2|IF2A_CHICK	315	1	310	52.2	314	135	15	307	3.0e-82	sp|Q5ZLX2|IF2A_CHICK Eukaryotic translation initiation factor 2 subunit 1 OS=Gallus gallus OX=9031 GN=EIF2S1 PE=2 SV=2
Unigene0000759	1131	153	1052	sp|Q9SIZ2|IF2AH_ARATH	344	10	328	51.7	319	135	19	300.8	2.2e-80	sp|Q9SIZ2|IF2AH_ARATH Eukaryotic translation initiation factor 2 subunit alpha homolog OS=Arabidopsis thaliana OX=3702 GN=At2g40290 PE=1 SV=2
Unigene0000759	1131	153	1052	sp|Q9FE78|IF2A_ARATH	344	10	328	53.3	319	130	19	295.8	6.9e-79	sp|Q9FE78|IF2A_ARATH Eukaryotic translation initiation factor 2 subunit alpha OS=Arabidopsis thaliana OX=3702 GN=EIF2A PE=1 SV=1
Unigene0000759	1131	138	1055	sp|P41374|IF2A_DROME	341	1	311	49.5	313	149	9	281.6	1.4e-74	sp|P41374|IF2A_DROME Eukaryotic translation initiation factor 2 subunit 1 OS=Drosophila melanogaster OX=7227 GN=eIF2alpha PE=2 SV=1
Unigene0000759	1131	144	998	sp|A0A509AJP9|IF2A_PLABA	326	10	295	49	286	145	1	276.2	5.7e-73	sp|A0A509AJP9|IF2A_PLABA Eukaryotic translation initiation factor 2 subunit 1 OS=Plasmodium berghei (strain Anka) OX=5823 GN=eIF2alpha PE=1 SV=1
Unigene0000759	1131	150	1013	sp|Q869N9|IF2A_DICDI	341	6	311	48.9	311	131	28	270	4.1e-71	sp|Q869N9|IF2A_DICDI Eukaryotic translation initiation factor 2 subunit 1 OS=Dictyostelium discoideum OX=44689 GN=eif2s1 PE=1 SV=1
Unigene0000759	1131	144	998	sp|Q8IBH7|IF2A_PLAF7	329	10	295	46.9	290	145	9	265	1.3e-69	sp|Q8IBH7|IF2A_PLAF7 Eukaryotic translation initiation factor 2 subunit 1 OS=Plasmodium falciparum (isolate 3D7) OX=36329 GN=eIF2alpha PE=1 SV=1
Unigene0000759	1131	168	950	sp|B6YT35|IF2A_THEON	275	6	267	27	267	184	11	102.8	8.6e-21	sp|B6YT35|IF2A_THEON Translation initiation factor 2 subunit alpha OS=Thermococcus onnurineus (strain NA1) OX=523850 GN=eif2a PE=3 SV=1
Unigene0000759	1131	177	821	sp|Q973G0|IF2A_SULTO	263	9	224	30.1	216	150	1	102.1	1.5e-20	sp|Q973G0|IF2A_SULTO Translation initiation factor 2 subunit alpha OS=Sulfurisphaera tokodaii (strain DSM 16993 / JCM 10545 / NBRC 100140 / 7) OX=273063 GN=eif2a PE=3 SV=1
Unigene0000759	1131	171	917	sp|C5A4Z9|IF2A_THEGJ	273	7	256	28.2	255	172	11	100.5	4.3e-20	sp|C5A4Z9|IF2A_THEGJ Translation initiation factor 2 subunit alpha OS=Thermococcus gammatolerans (strain DSM 15229 / JCM 11827 / EJ3) OX=593117 GN=eif2a PE=3 SV=1
Unigene0000760	2297	2099	99	sp|Q9LW63|PP251_ARATH	715	49	715	33.7	703	394	72	438.7	1.3e-121	sp|Q9LW63|PP251_ARATH Putative pentatricopeptide repeat-containing protein At3g23330 OS=Arabidopsis thaliana OX=3702 GN=PCMP-H32 PE=3 SV=1
Unigene0000760	2297	2084	99	sp|Q3E6Q1|PPR32_ARATH	809	185	809	34.3	662	398	37	435.6	1.1e-120	sp|Q3E6Q1|PPR32_ARATH Pentatricopeptide repeat-containing protein At1g11290, chloroplastic OS=Arabidopsis thaliana OX=3702 GN=PCMP-H40 PE=2 SV=1
Unigene0000760	2297	2063	99	sp|Q9LNU6|PPR53_ARATH	760	72	760	35.2	690	411	36	425.2	1.5e-117	sp|Q9LNU6|PPR53_ARATH Pentatricopeptide repeat-containing protein At1g20230 OS=Arabidopsis thaliana OX=3702 GN=PCMP-H21 PE=2 SV=2
Unigene0000760	2297	2123	99	sp|O81767|PP348_ARATH	823	190	823	33.1	676	409	43	424.5	2.6e-117	sp|O81767|PP348_ARATH Pentatricopeptide repeat-containing protein At4g33990 OS=Arabidopsis thaliana OX=3702 GN=EMB2758 PE=3 SV=2
Unigene0000760	2297	2099	99	sp|Q9SN39|PP320_ARATH	871	240	871	34	667	405	35	423.7	4.5e-117	sp|Q9SN39|PP320_ARATH Pentatricopeptide repeat-containing protein DOT4, chloroplastic OS=Arabidopsis thaliana OX=3702 GN=DOT4 PE=2 SV=1
Unigene0000760	2297	2081	99	sp|Q9LFL5|PP390_ARATH	850	178	850	31.9	706	403	78	423.3	5.9e-117	sp|Q9LFL5|PP390_ARATH Pentatricopeptide repeat-containing protein At5g16860 OS=Arabidopsis thaliana OX=3702 GN=PCMP-H92 PE=2 SV=1
Unigene0000760	2297	2087	99	sp|Q7Y211|PP285_ARATH	890	250	890	34.3	668	407	32	420.6	3.8e-116	sp|Q7Y211|PP285_ARATH Pentatricopeptide repeat-containing protein At3g57430, chloroplastic OS=Arabidopsis thaliana OX=3702 GN=PCMP-H81 PE=2 SV=2
Unigene0000760	2297	2051	99	sp|Q9LW32|PP258_ARATH	659	36	659	33.4	659	396	43	412.5	1.0e-113	sp|Q9LW32|PP258_ARATH Pentatricopeptide repeat-containing protein At3g26782, mitochondrial OS=Arabidopsis thaliana OX=3702 GN=PCMP-H34 PE=2 SV=1
Unigene0000760	2297	2087	99	sp|Q9SUH6|PP341_ARATH	792	66	792	31.1	727	437	64	407.1	4.3e-112	sp|Q9SUH6|PP341_ARATH Pentatricopeptide repeat-containing protein At4g30700 OS=Arabidopsis thaliana OX=3702 GN=DYW9 PE=2 SV=1
Unigene0000760	2297	2081	99	sp|O82380|PP175_ARATH	738	80	738	34.1	662	432	4	406	9.7e-112	sp|O82380|PP175_ARATH Pentatricopeptide repeat-containing protein At2g29760, chloroplastic OS=Arabidopsis thaliana OX=3702 GN=PCMP-H33 PE=2 SV=1
Unigene0000760	2297	2129	99	sp|Q9LTV8|PP224_ARATH	694	56	694	33.1	679	412	42	403.3	6.3e-111	sp|Q9LTV8|PP224_ARATH Pentatricopeptide repeat-containing protein At3g12770 OS=Arabidopsis thaliana OX=3702 GN=PCMP-H43 PE=2 SV=1
Unigene0000760	2297	2072	99	sp|Q9SS60|PP210_ARATH	882	261	882	32.5	659	407	38	399.4	9.1e-110	sp|Q9SS60|PP210_ARATH Pentatricopeptide repeat-containing protein At3g03580 OS=Arabidopsis thaliana OX=3702 GN=PCMP-H23 PE=2 SV=1
Unigene0000760	2297	1868	99	sp|Q9LIC3|PP227_ARATH	628	72	628	34.6	592	350	37	397.9	2.6e-109	sp|Q9LIC3|PP227_ARATH Putative pentatricopeptide repeat-containing protein At3g13770, mitochondrial OS=Arabidopsis thaliana OX=3702 GN=PCMP-H85 PE=3 SV=1
Unigene0000760	2297	2087	99	sp|Q0WN60|PPR48_ARATH	970	341	970	31.7	666	416	39	396.7	5.9e-109	sp|Q0WN60|PPR48_ARATH Pentatricopeptide repeat-containing protein At1g18485 OS=Arabidopsis thaliana OX=3702 GN=PCMP-H8 PE=2 SV=2
Unigene0000760	2297	2072	99	sp|Q0WSH6|PP312_ARATH	684	61	684	34.1	660	397	38	396.4	7.7e-109	sp|Q0WSH6|PP312_ARATH Pentatricopeptide repeat-containing protein At4g14850 OS=Arabidopsis thaliana OX=3702 GN=LOI1 PE=1 SV=1
Unigene0000760	2297	1979	99	sp|Q9CAA8|PP108_ARATH	743	122	743	32.4	657	379	65	396	1.0e-108	sp|Q9CAA8|PP108_ARATH Putative pentatricopeptide repeat-containing protein At1g68930 OS=Arabidopsis thaliana OX=3702 GN=PCMP-H22 PE=3 SV=1
Unigene0000760	2297	2039	99	sp|Q9SVP7|PP307_ARATH	1064	454	1064	31.4	647	408	36	395.6	1.3e-108	sp|Q9SVP7|PP307_ARATH Pentatricopeptide repeat-containing protein At4g13650 OS=Arabidopsis thaliana OX=3702 GN=PCMP-H42 PE=2 SV=2
Unigene0000760	2297	2072	99	sp|Q9SMZ2|PP347_ARATH	990	369	990	33	660	402	40	392.1	1.4e-107	sp|Q9SMZ2|PP347_ARATH Pentatricopeptide repeat-containing protein At4g33170 OS=Arabidopsis thaliana OX=3702 GN=PCMP-H53 PE=3 SV=1
Unigene0000760	2297	1982	99	sp|Q9CAY1|PP223_ARATH	623	36	623	33.1	632	375	48	391.7	1.9e-107	sp|Q9CAY1|PP223_ARATH Putative pentatricopeptide repeat-containing protein At3g11460, mitochondrial OS=Arabidopsis thaliana OX=3702 GN=PCMP-H52 PE=1 SV=1
Unigene0000760	2297	1895	99	sp|Q9LTF4|PP429_ARATH	588	26	588	35.2	600	351	38	389.4	9.4e-107	sp|Q9LTF4|PP429_ARATH Putative pentatricopeptide repeat-containing protein At5g52630 OS=Arabidopsis thaliana OX=3702 GN=PCMP-H52 PE=3 SV=1
Unigene0000769	824	781	50	sp|B6HNY8|MTNB_PENRW	243	1	243	92.6	244	17	1	493.4	1.7e-138	sp|B6HNY8|MTNB_PENRW Methylthioribulose-1-phosphate dehydratase OS=Penicillium rubens (strain ATCC 28089 / DSM 1075 / NRRL 1951 / Wisconsin 54-1255) OX=500485 GN=mde1 PE=3 SV=1
Unigene0000769	824	745	50	sp|A1CW59|MTNB_NEOFI	240	9	240	89.2	232	25	0	456.1	2.9e-127	sp|A1CW59|MTNB_NEOFI Methylthioribulose-1-phosphate dehydratase OS=Neosartorya fischeri (strain ATCC 1020 / DSM 3700 / CBS 544.65 / FGSC A1164 / JCM 1740 / NRRL 181 / WB 181) OX=331117 GN=mde1 PE=3 SV=1
Unigene0000769	824	745	50	sp|B0Y4N9|MTNB_ASPFC	240	9	240	88.8	232	26	0	454.9	6.5e-127	sp|B0Y4N9|MTNB_ASPFC Methylthioribulose-1-phosphate dehydratase OS=Aspergillus fumigatus (strain CBS 144.89 / FGSC A1163 / CEA10) OX=451804 GN=mde1 PE=3 SV=1
Unigene0000769	824	745	50	sp|Q4WQH4|MTNB_ASPFU	240	9	240	88.8	232	26	0	454.9	6.5e-127	sp|Q4WQH4|MTNB_ASPFU Methylthioribulose-1-phosphate dehydratase OS=Aspergillus fumigatus (strain ATCC MYA-4609 / CBS 101355 / FGSC A1100 / Af293) OX=330879 GN=mde1 PE=3 SV=1
Unigene0000769	824	745	50	sp|Q5B787|MTNB_EMENI	240	9	240	86.2	232	32	0	446.4	2.3e-124	sp|Q5B787|MTNB_EMENI Methylthioribulose-1-phosphate dehydratase OS=Emericella nidulans (strain FGSC A4 / ATCC 38163 / CBS 112.46 / NRRL 194 / M139) OX=227321 GN=mde1 PE=3 SV=1
Unigene0000769	824	739	50	sp|A1CIK4|MTNB_ASPCL	245	16	245	86.5	230	31	0	441.8	5.7e-123	sp|A1CIK4|MTNB_ASPCL Methylthioribulose-1-phosphate dehydratase OS=Aspergillus clavatus (strain ATCC 1007 / CBS 513.65 / DSM 816 / NCTC 3887 / NRRL 1 / QM 1276 / 107) OX=344612 GN=mde1 PE=3 SV=1
Unigene0000769	824	748	50	sp|C1H861|MTNB_PARBA	240	7	239	85	233	35	0	438	8.2e-122	sp|C1H861|MTNB_PARBA Methylthioribulose-1-phosphate dehydratase OS=Paracoccidioides lutzii (strain ATCC MYA-826 / Pb01) OX=502779 GN=MDE1 PE=3 SV=1
Unigene0000769	824	748	50	sp|C0S4Z7|MTNB_PARBP	240	7	239	84.5	233	36	0	437.2	1.4e-121	sp|C0S4Z7|MTNB_PARBP Methylthioribulose-1-phosphate dehydratase OS=Paracoccidioides brasiliensis (strain Pb03) OX=482561 GN=MDE1 PE=3 SV=1
Unigene0000769	824	748	50	sp|C1G3Q0|MTNB_PARBD	240	7	239	84.1	233	37	0	436	3.1e-121	sp|C1G3Q0|MTNB_PARBD Methylthioribulose-1-phosphate dehydratase OS=Paracoccidioides brasiliensis (strain Pb18) OX=502780 GN=MDE1 PE=3 SV=1
Unigene0000769	824	745	50	sp|B8NSW2|MTNB_ASPFN	241	9	240	85.8	232	33	0	435.6	4.1e-121	sp|B8NSW2|MTNB_ASPFN Methylthioribulose-1-phosphate dehydratase OS=Aspergillus flavus (strain ATCC 200026 / FGSC A1120 / IAM 13836 / NRRL 3357 / JCM 12722 / SRRC 167) OX=332952 GN=mde1 PE=3 SV=1
Unigene0000769	824	745	50	sp|Q2UUH5|MTNB_ASPOR	241	9	240	85.8	232	33	0	435.6	4.1e-121	sp|Q2UUH5|MTNB_ASPOR Methylthioribulose-1-phosphate dehydratase OS=Aspergillus oryzae (strain ATCC 42149 / RIB 40) OX=510516 GN=mde1 PE=3 SV=1
Unigene0000769	824	745	50	sp|A2Q9M4|MTNB_ASPNC	242	9	240	84.1	232	37	0	435.3	5.3e-121	sp|A2Q9M4|MTNB_ASPNC Methylthioribulose-1-phosphate dehydratase OS=Aspergillus niger (strain ATCC MYA-4892 / CBS 513.88 / FGSC A1513) OX=425011 GN=mde1 PE=3 SV=1
Unigene0000769	824	745	50	sp|Q0CT19|MTNB_ASPTN	241	10	241	84.5	232	36	0	433.7	1.6e-120	sp|Q0CT19|MTNB_ASPTN Methylthioribulose-1-phosphate dehydratase OS=Aspergillus terreus (strain NIH 2624 / FGSC A1156) OX=341663 GN=mde1 PE=3 SV=1
Unigene0000769	824	745	50	sp|C6H2R1|MTNB_AJECH	240	8	239	84.5	232	36	0	433.3	2.0e-120	sp|C6H2R1|MTNB_AJECH Methylthioribulose-1-phosphate dehydratase OS=Ajellomyces capsulatus (strain H143) OX=544712 GN=MDE1 PE=3 SV=1
Unigene0000769	824	745	50	sp|A6RAS3|MTNB_AJECN	240	8	239	84.5	232	36	0	433.3	2.0e-120	sp|A6RAS3|MTNB_AJECN Methylthioribulose-1-phosphate dehydratase OS=Ajellomyces capsulatus (strain NAm1 / WU24) OX=2059318 GN=MDE1 PE=3 SV=1
Unigene0000769	824	763	50	sp|C5GGA4|MTNB_AJEDR	241	3	240	82.8	238	41	0	433.3	2.0e-120	sp|C5GGA4|MTNB_AJEDR Methylthioribulose-1-phosphate dehydratase OS=Ajellomyces dermatitidis (strain ER-3 / ATCC MYA-2586) OX=559297 GN=MDE1 PE=3 SV=1
Unigene0000769	824	763	50	sp|C5JIC2|MTNB_BLAGS	241	3	240	82.8	238	41	0	432.6	3.5e-120	sp|C5JIC2|MTNB_BLAGS Methylthioribulose-1-phosphate dehydratase OS=Blastomyces gilchristii (strain SLH14081) OX=559298 GN=MDE1 PE=3 SV=1
Unigene0000769	824	745	50	sp|C0NN25|MTNB_AJECG	240	8	239	84.1	232	37	0	432.2	4.5e-120	sp|C0NN25|MTNB_AJECG Methylthioribulose-1-phosphate dehydratase OS=Ajellomyces capsulatus (strain G186AR / H82 / ATCC MYA-2454 / RMSCC 2432) OX=447093 GN=MDE1 PE=3 SV=1
Unigene0000769	824	745	53	sp|C5FEJ4|MTNB_ARTOC	249	14	244	83.1	231	39	0	423.3	2.1e-117	sp|C5FEJ4|MTNB_ARTOC Methylthioribulose-1-phosphate dehydratase OS=Arthroderma otae (strain ATCC MYA-4605 / CBS 113480) OX=554155 GN=MDE1 PE=3 SV=2
Unigene0000769	824	745	50	sp|C5PIC1|MTNB_COCP7	237	6	237	82.3	232	41	0	423.3	2.1e-117	sp|C5PIC1|MTNB_COCP7 Methylthioribulose-1-phosphate dehydratase OS=Coccidioides posadasii (strain C735) OX=222929 GN=MDE1 PE=3 SV=1
Unigene0000770	1145	254	892	sp|Q9LVZ8|LOR12_ARATH	220	5	203	53.7	214	83	16	206.1	7.3e-52	sp|Q9LVZ8|LOR12_ARATH Protein LURP-one-related 12 OS=Arabidopsis thaliana OX=3702 GN=At3g15810 PE=2 SV=1
Unigene0000770	1145	299	892	sp|Q9SSC7|LOR5_ARATH	210	7	192	56.3	199	73	14	200.3	4.0e-50	sp|Q9SSC7|LOR5_ARATH Protein LURP-one-related 5 OS=Arabidopsis thaliana OX=3702 GN=At1g80120 PE=2 SV=1
Unigene0000770	1145	371	889	sp|Q9LZX1|LOR15_ARATH	217	51	211	33.5	173	103	12	87.4	3.8e-16	sp|Q9LZX1|LOR15_ARATH Protein LURP-one-related 15 OS=Arabidopsis thaliana OX=3702 GN=At5g01750 PE=1 SV=1
Unigene0000770	1145	398	802	sp|Q9LSQ1|LOR13_ARATH	185	39	172	30.9	139	87	9	55.8	1.2e-06	sp|Q9LSQ1|LOR13_ARATH Protein LURP-one-related 13 OS=Arabidopsis thaliana OX=3702 GN=At3g16900 PE=3 SV=1
Unigene0000774	1083	86	1078	sp|Q9LZW4|CIPKE_ARATH	442	18	347	62.7	335	116	9	429.5	3.9e-119	sp|Q9LZW4|CIPKE_ARATH CBL-interacting serine/threonine-protein kinase 14 OS=Arabidopsis thaliana OX=3702 GN=CIPK14 PE=1 SV=1
Unigene0000774	1083	86	1078	sp|O22932|CIPKB_ARATH	435	17	345	62.3	337	113	14	421.4	1.1e-116	sp|O22932|CIPKB_ARATH CBL-interacting serine/threonine-protein kinase 11 OS=Arabidopsis thaliana OX=3702 GN=CIPK11 PE=1 SV=1
Unigene0000774	1083	83	1072	sp|Q9SN43|CIPKC_ARATH	489	21	373	57.9	356	121	29	408.7	7.0e-113	sp|Q9SN43|CIPKC_ARATH CBL-interacting serine/threonine-protein kinase 12 OS=Arabidopsis thaliana OX=3702 GN=CIPK12 PE=1 SV=1
Unigene0000774	1083	8	1078	sp|Q68Y49|CIPKJ_ORYSJ	508	12	413	51	408	143	57	399.8	3.3e-110	sp|Q68Y49|CIPKJ_ORYSJ CBL-interacting protein kinase 19 OS=Oryza sativa subsp. japonica OX=39947 GN=CIPK19 PE=1 SV=1
Unigene0000774	1083	83	1072	sp|Q9FJ55|CIPKJ_ARATH	483	23	377	56.7	356	127	27	395.6	6.2e-109	sp|Q9FJ55|CIPKJ_ARATH CBL-interacting serine/threonine-protein kinase 19 OS=Arabidopsis thaliana OX=3702 GN=CIPK19 PE=1 SV=1
Unigene0000774	1083	77	1072	sp|Q9LP51|CIPKI_ARATH	520	67	420	54.9	355	136	24	391.3	1.2e-107	sp|Q9LP51|CIPKI_ARATH CBL-interacting serine/threonine-protein kinase 18 OS=Arabidopsis thaliana OX=3702 GN=CIPK18 PE=1 SV=1
Unigene0000774	1083	56	1081	sp|O65554|CIPK6_ARATH	441	9	354	55.7	350	143	12	387.1	2.2e-106	sp|O65554|CIPK6_ARATH CBL-interacting serine/threonine-protein kinase 6 OS=Arabidopsis thaliana OX=3702 GN=CIPK6 PE=1 SV=1
Unigene0000774	1083	77	1081	sp|Q9LWM4|CIPK5_ORYSJ	461	5	353	56	350	138	16	386.7	2.9e-106	sp|Q9LWM4|CIPK5_ORYSJ CBL-interacting protein kinase 5 OS=Oryza sativa subsp. japonica OX=39947 GN=CIPK5 PE=2 SV=1
[truncated: 368,221+ more rows]

## Sheet: Table S6
Table S6 KEGG annotation to pathway results statistics
KEGG_A_class	KEGG_B_class	Pathway	Count (11572)	Pathway ID	Genes	K_IDs
[truncated: 155 more rows]

## Sheet: Table S7
Table S7 COG/KOG classification statistics
[truncated: 42 more rows]

## Sheet: Table S8
Table S8 GO secondary classification statistics
[truncated: 105 more rows]

[truncated: 1 more sheets: Table S9]
