# Supplementary material
Source: Research Square preprint supplement (doi:10.21203/rs.3.rs-9585445/v1)
Supplement: Supplementary file 2 [file c4964812465f6c0f03c3273e.docx]

**Additional file 1**

**Integrated transcriptome sequencing approach provides insights into the mechanism of stamen petaloidy in *Clivia miniata***

Xinghua Zhao1, Ling Yue1, Dan Li1, Xiuli Feng1, Xi Ren1, Jingyu Yue2, Jiajun Lei2*

1Institute of Floriculture, Liaoning Academy of Agricultural Sciences, Shenyang 110161, Liaoning, China

2College of Horticulture, Shenyang Agricultural University, Shenyang, 110866, Liaoning, China

* Corresponding author

*E-mail address*: Jiajun Lei ([jiajunlei@syau.edu.cn](mailto:jiajunlei@syau.edu.cn)); Tel.: +86 13478198765.


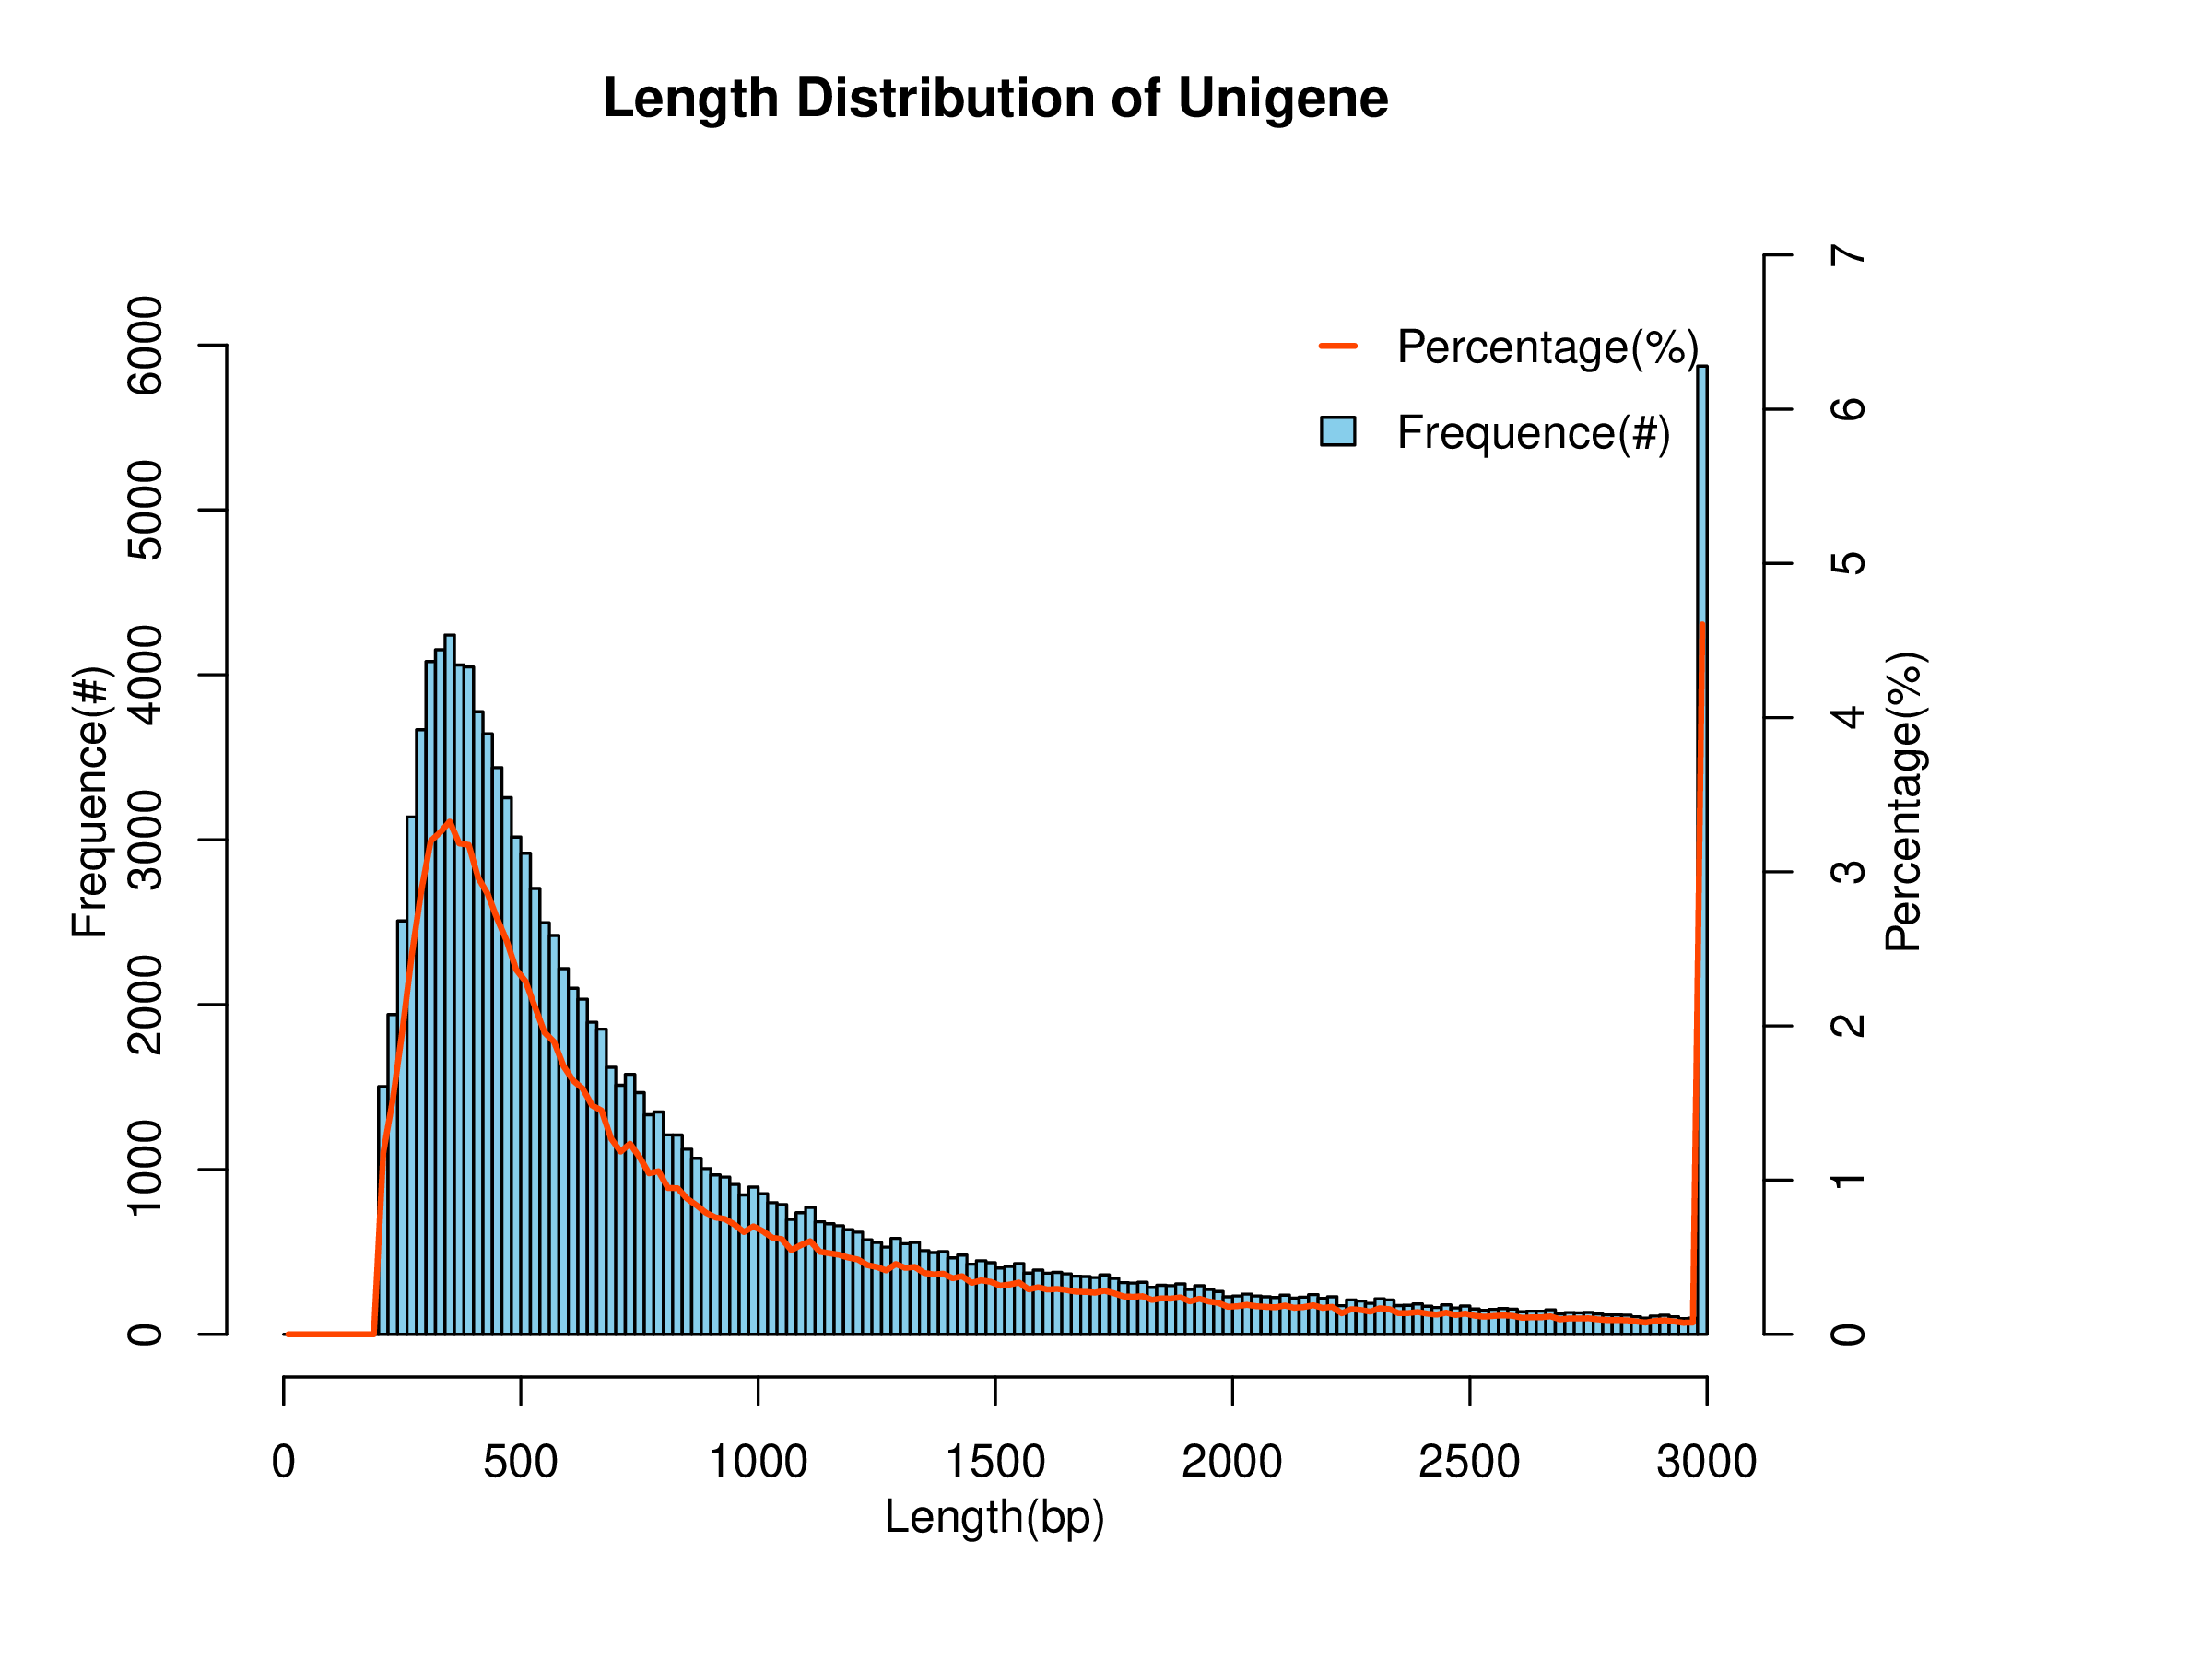


**Figure S1.** Length distribution of Unigene.


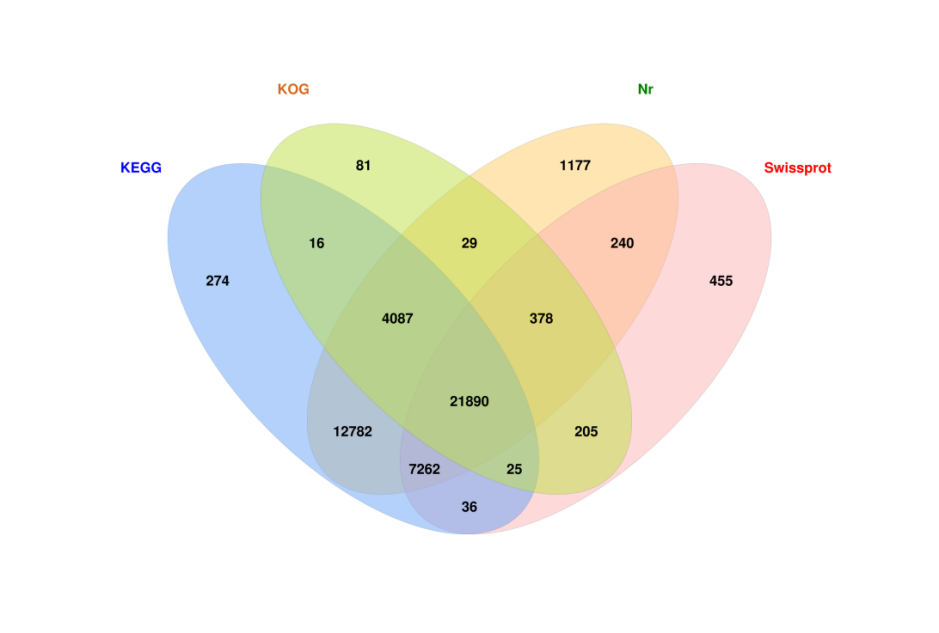


**Figure S2.** The numbers of unigenes annotated in four database (KOG, SwissProt, KEGG, Nr) at an E-value < 10−5.


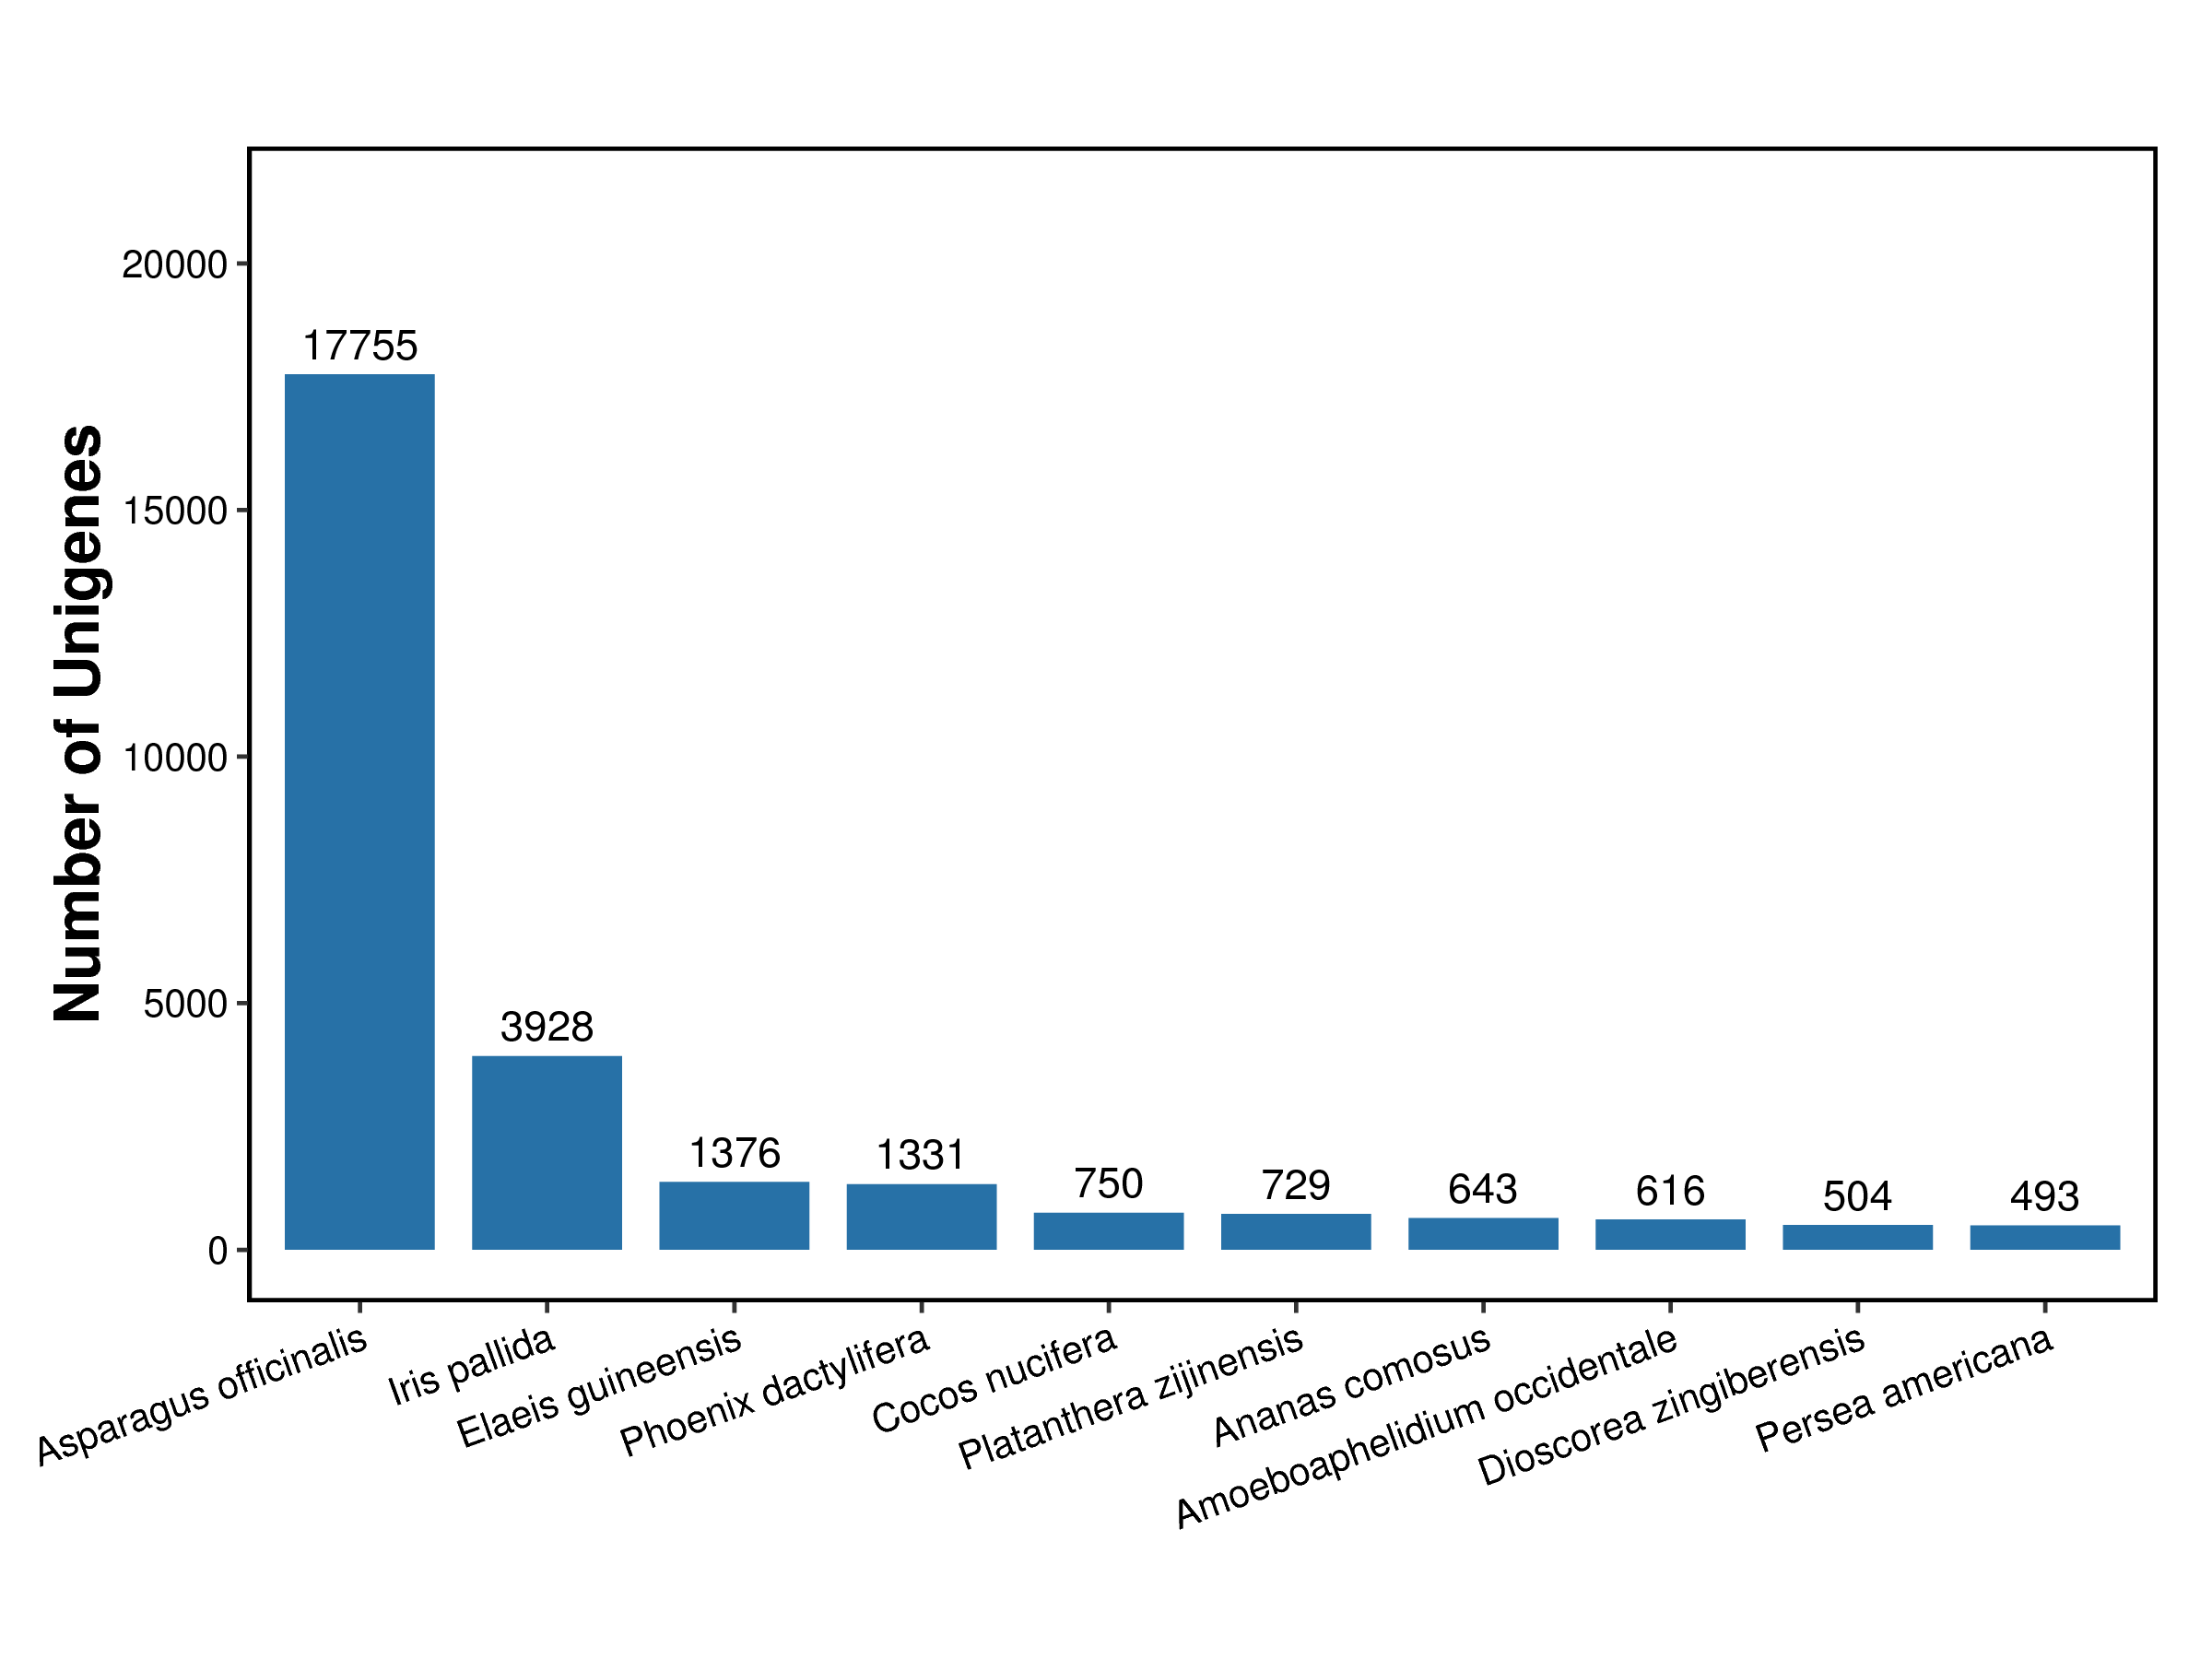


**Figure S3.** Number of homologous sequences from various species matched to Unigene sequences in the Nr database.


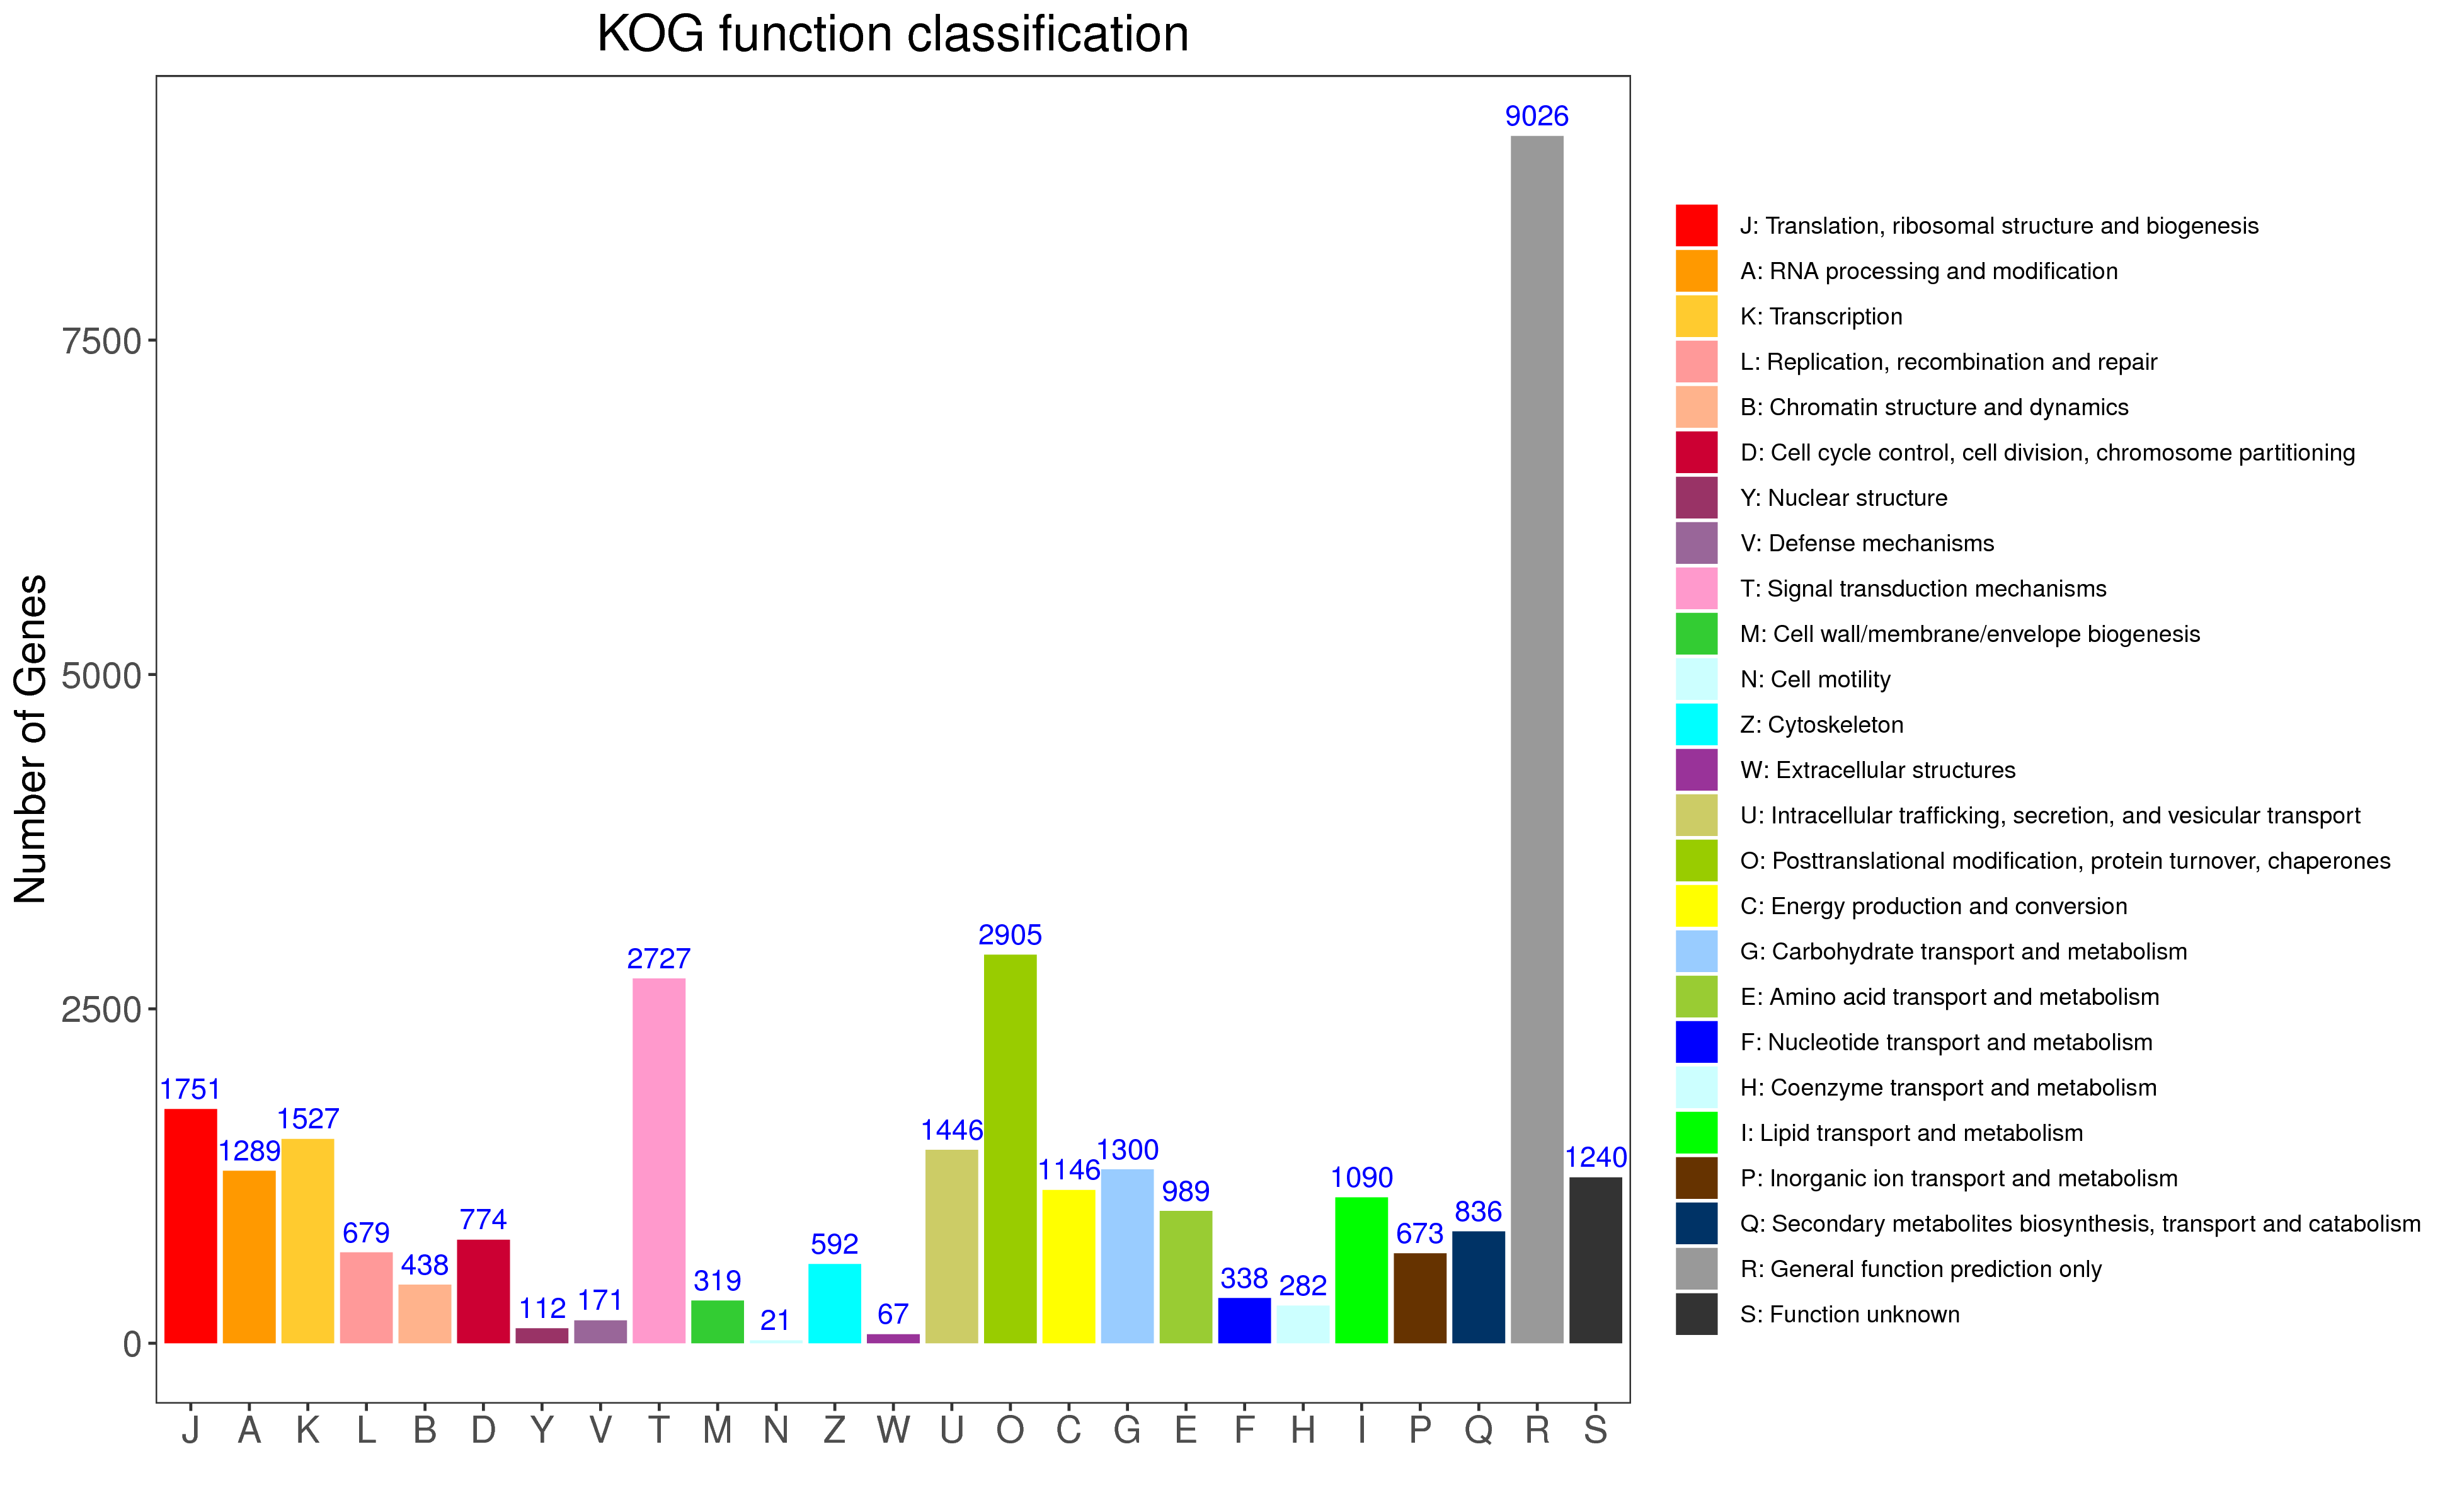


**Figure S4.** KOG classification statistics.


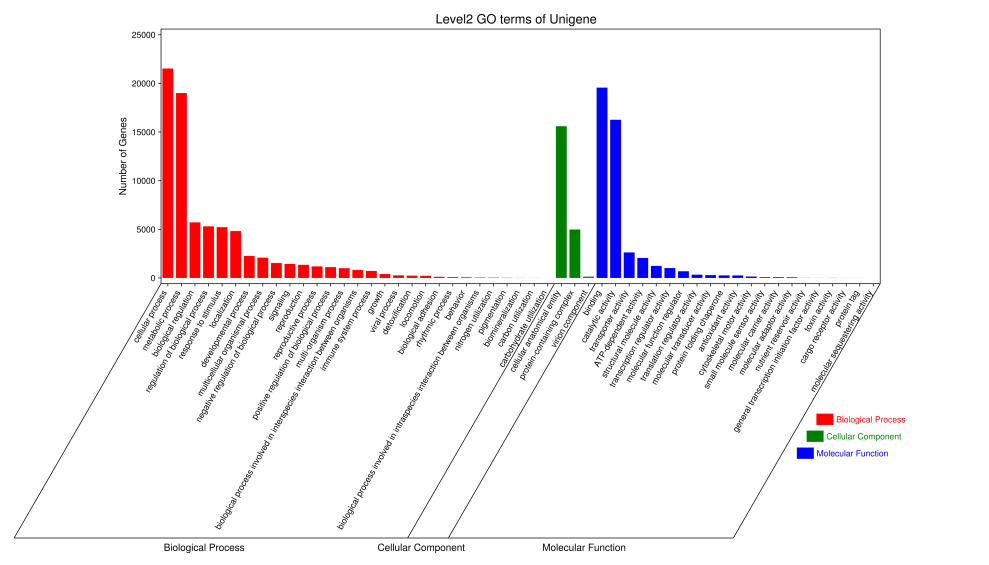


**Figure S5.** GO secondary classification statistics.


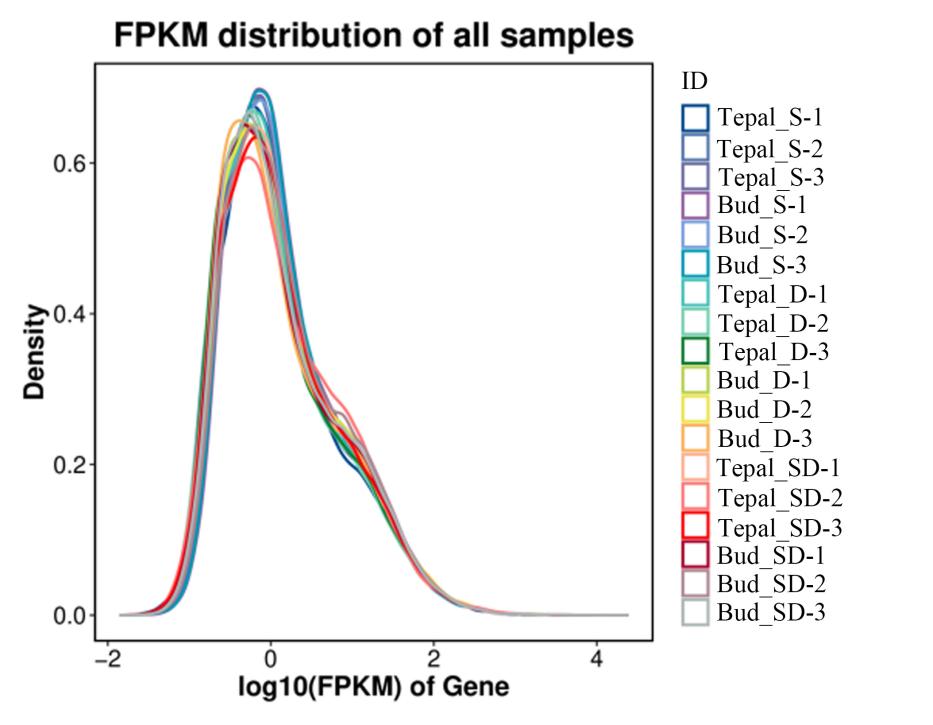


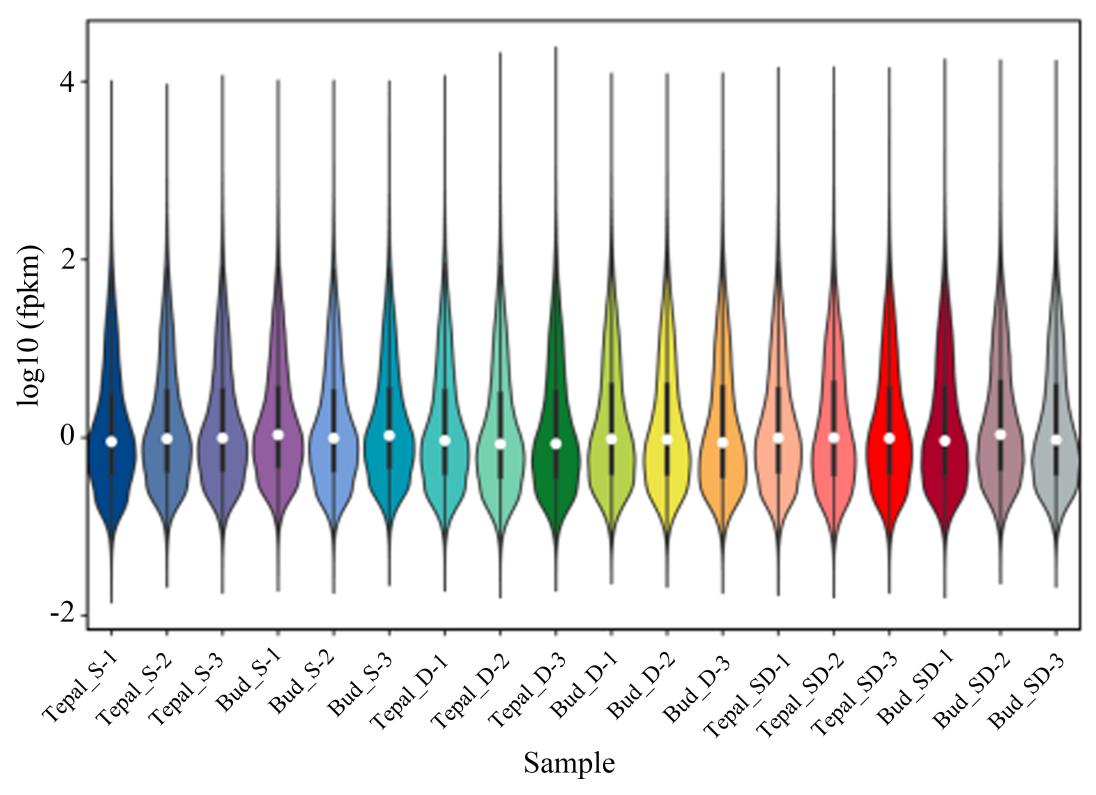


**Figure S6.** Gene expression abundance distribution plot and sample expression violin plot.


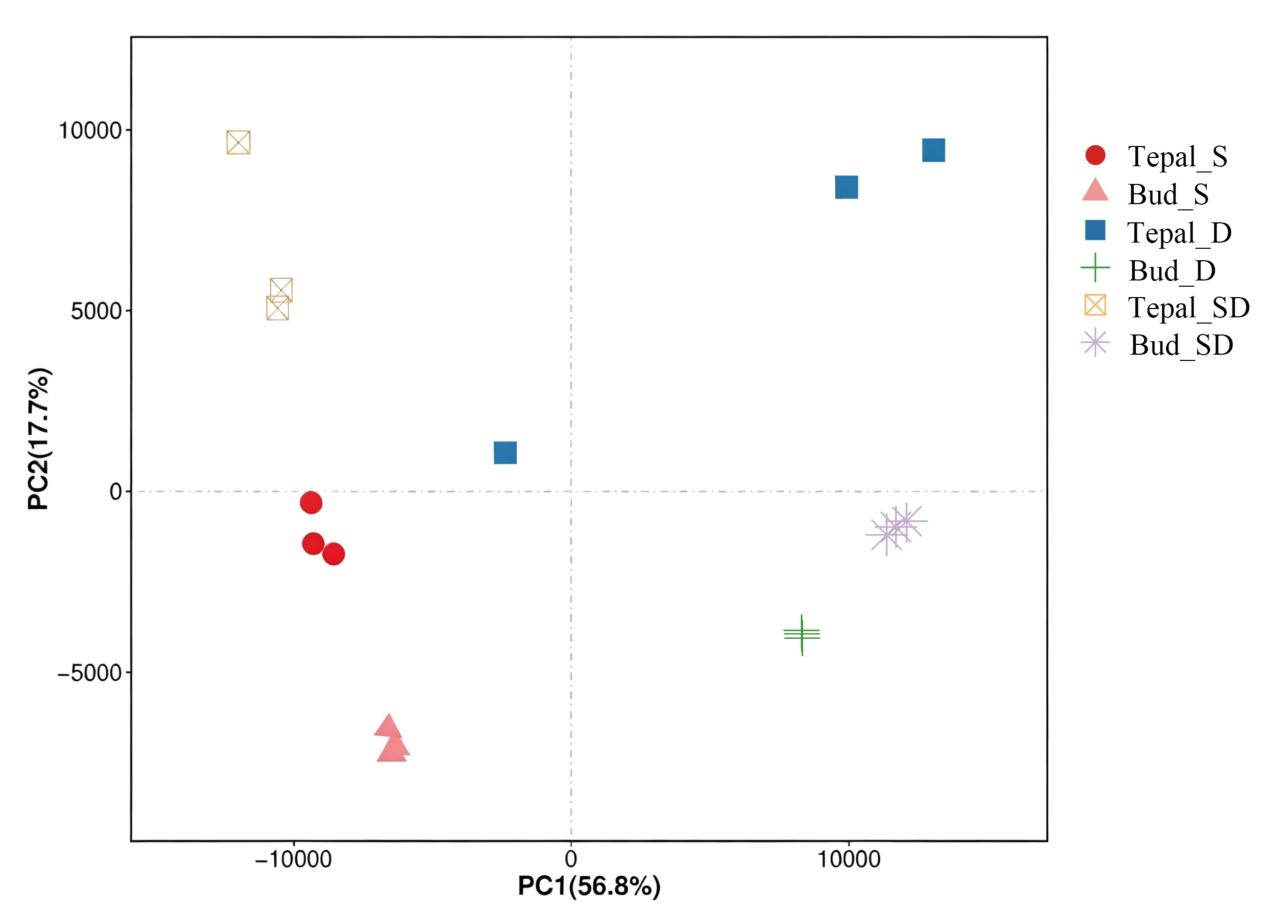


**Figure S7.** Sample principal component analysis.
